# Supplementary material for: Addressing Genetic Tumor Heterogeneity through Computationally Predictive Combination Therapy
Source: Oxford University Press journal article supplement (doi:10.1158/2159-8290.cd-13-0465), 2013-12-07
Supplement: 21598290cd130465-sup-supp_tables.xlsx [file 21598290cd130465-sup-supp_tables.xlsx]

## Sheet: Supp Table 1
Table S1 - Drugs Used
Drug name	Abbreviation	Brand name	Mechanism of Action	Class
Doxorubicin	Dox	Adriamycin	Topoisomerase II inhibition; DSBs induction	Cytotoxic
Chlorambucil	CBL	Leukeran	DNA alkylation	Cytotoxic
5-FU		Efudex	Thymidylate synthase inhibition	Cytotoxic
Vincristine	Vin	Oncovin	Microtubule inhibition	Cytotoxic
Irinotecan	IRT	Camptosar	Topoisomerase I inhibition; SSBs induction	Cytotoxic
Actinomycin D	ActD	Cosmegen	Transcription inhibition	Cytotoxic
Sunitinib		Sutent	PDGFRA, PDGFRB, VEGFR, KIT, FLT3 inhibition	Targeted
Erlotinib	Erl	Tarceva	EGFR inhibition	Targeted
17-AAG		Tanespimycin	HSP90 inhibition	Targeted
Vorinostat	SAHA	Zolinza	HDAC inhibition	Targeted

## Sheet: Supp Table 2
Table S2
pop struct id	pop struct N	p53	chk2	atr	chk1	atx	dnapk	bok	bim	best-N	best-drugs	best-dose	best-effects	worst-N	worst-drugs	worst-dose	worst-effects	diff (worst-best)	dominant species	bestDominant-N	bestDominant-drugs	bestDominant-dose	bestDominant-effects	best-N	best-drugs	best-dose	best-effects	diff
1	2	0.01	0.99	0	0	0	0	0	0	2	ActD Erlotinib	0.50 0.50	0.02	2	CBL IRT	0.50 0.50	3.48	3.46	chk2	2	ActD Erlotinib	0.50 0.50	0.02	2	ActD Erlotinib	0.50 0.50	0.02	0
2	2	0.02	0.98	0	0	0	0	0	0	2	ActD Erlotinib	0.50 0.50	0.06	2	CBL IRT	0.50 0.50	3.48	3.42	chk2	2	ActD Erlotinib	0.50 0.50	0.06	2	ActD Erlotinib	0.50 0.50	0.06	0
3	2	0.03	0.97	0	0	0	0	0	0	2	ActD Erlotinib	0.50 0.50	0.08	2	CBL IRT	0.50 0.50	3.48	3.4	chk2	2	ActD Erlotinib	0.50 0.50	0.08	2	ActD Erlotinib	0.50 0.50	0.08	0
4	2	0.04	0.96	0	0	0	0	0	0	2	ActD Erlotinib	0.50 0.50	0.1	2	CBL IRT	0.50 0.50	3.48	3.38	chk2	2	ActD Erlotinib	0.50 0.50	0.1	2	ActD Erlotinib	0.50 0.50	0.1	0
5	2	0.05	0.95	0	0	0	0	0	0	2	ActD Erlotinib	0.50 0.50	0.14	2	CBL IRT	0.50 0.50	3.48	3.34	chk2	2	ActD Erlotinib	0.50 0.50	0.14	2	ActD Erlotinib	0.50 0.50	0.14	0
6	2	0.06	0.94	0	0	0	0	0	0	2	ActD Erlotinib	0.50 0.50	0.16	2	CBL IRT	0.50 0.50	3.48	3.32	chk2	2	ActD Erlotinib	0.50 0.50	0.16	2	ActD Erlotinib	0.50 0.50	0.16	0
7	2	0.07	0.93	0	0	0	0	0	0	2	ActD Erlotinib	0.50 0.50	0.18	2	CBL IRT	0.50 0.50	3.48	3.3	chk2	2	ActD Erlotinib	0.50 0.50	0.18	2	ActD Erlotinib	0.50 0.50	0.18	0
8	2	0.08	0.92	0	0	0	0	0	0	2	ActD Erlotinib	0.50 0.50	0.22	2	CBL IRT	0.50 0.50	3.48	3.26	chk2	2	ActD Erlotinib	0.50 0.50	0.22	2	ActD Erlotinib	0.50 0.50	0.22	0
9	2	0.09	0.91	0	0	0	0	0	0	2	ActD Erlotinib	0.50 0.50	0.24	2	CBL IRT	0.50 0.50	3.5	3.26	chk2	2	ActD Erlotinib	0.50 0.50	0.24	2	ActD Erlotinib	0.50 0.50	0.24	0
10	2	0.1	0.9	0	0	0	0	0	0	2	ActD Erlotinib	0.50 0.50	0.26	2	CBL IRT	0.50 0.50	3.5	3.24	chk2	2	ActD Erlotinib	0.50 0.50	0.26	2	ActD Erlotinib	0.50 0.50	0.26	0
11	2	0.11	0.89	0	0	0	0	0	0	2	ActD Erlotinib	0.50 0.50	0.3	2	CBL IRT	0.50 0.50	3.5	3.2	chk2	2	ActD Erlotinib	0.50 0.50	0.3	2	ActD Erlotinib	0.50 0.50	0.3	0
12	2	0.12	0.88	0	0	0	0	0	0	2	ActD Erlotinib	0.50 0.50	0.32	2	CBL IRT	0.50 0.50	3.5	3.18	chk2	2	ActD Erlotinib	0.50 0.50	0.32	2	ActD Erlotinib	0.50 0.50	0.32	0
13	2	0.13	0.87	0	0	0	0	0	0	2	Erlotinib SAHA	0.50 0.50	0.34	2	CBL IRT	0.50 0.50	3.5	3.16	chk2	2	ActD Erlotinib	0.50 0.50	0.34	2	Erlotinib SAHA	0.50 0.50	0.34	0
14	2	0.14	0.86	0	0	0	0	0	0	2	Erlotinib SAHA	0.50 0.50	0.36	2	CBL IRT	0.50 0.50	3.5	3.14	chk2	2	ActD Erlotinib	0.50 0.50	0.36	2	Erlotinib SAHA	0.50 0.50	0.36	0
15	2	0.15	0.85	0	0	0	0	0	0	2	Erlotinib SAHA	0.50 0.50	0.36	2	CBL IRT	0.50 0.50	3.5	3.14	chk2	2	ActD Erlotinib	0.50 0.50	0.4	2	Erlotinib SAHA	0.50 0.50	0.36	0.04
16	2	0.16	0.84	0	0	0	0	0	0	2	Erlotinib SAHA	0.50 0.50	0.38	2	CBL IRT	0.50 0.50	3.5	3.12	chk2	2	ActD Erlotinib	0.50 0.50	0.42	2	Erlotinib SAHA	0.50 0.50	0.38	0.04
17	2	0.17	0.83	0	0	0	0	0	0	2	Erlotinib SAHA	0.50 0.50	0.38	2	CBL IRT	0.50 0.50	3.5	3.12	chk2	2	ActD Erlotinib	0.50 0.50	0.44	2	Erlotinib SAHA	0.50 0.50	0.38	0.06
18	2	0.18	0.82	0	0	0	0	0	0	2	Erlotinib SAHA	0.50 0.50	0.4	2	CBL IRT	0.50 0.50	3.5	3.1	chk2	2	ActD Erlotinib	0.50 0.50	0.48	2	Erlotinib SAHA	0.50 0.50	0.4	0.08
19	2	0.19	0.81	0	0	0	0	0	0	2	Erlotinib SAHA	0.50 0.50	0.42	2	CBL IRT	0.50 0.50	3.5	3.08	chk2	2	ActD Erlotinib	0.50 0.50	0.5	2	Erlotinib SAHA	0.50 0.50	0.42	0.08
20	2	0.2	0.8	0	0	0	0	0	0	2	Erlotinib SAHA	0.50 0.50	0.42	2	CBL IRT	0.50 0.50	3.5	3.08	chk2	2	ActD Erlotinib	0.50 0.50	0.52	2	Erlotinib SAHA	0.50 0.50	0.42	0.1
21	2	0.21	0.79	0	0	0	0	0	0	2	Erlotinib SAHA	0.50 0.50	0.44	2	CBL IRT	0.50 0.50	3.52	3.08	chk2	2	ActD Erlotinib	0.50 0.50	0.56	2	Erlotinib SAHA	0.50 0.50	0.44	0.12
22	2	0.22	0.78	0	0	0	0	0	0	2	Erlotinib SAHA	0.50 0.50	0.46	2	CBL IRT	0.50 0.50	3.52	3.06	chk2	2	ActD Erlotinib	0.50 0.50	0.58	2	Erlotinib SAHA	0.50 0.50	0.46	0.12
23	2	0.23	0.77	0	0	0	0	0	0	2	Erlotinib SAHA	0.50 0.50	0.46	2	CBL IRT	0.50 0.50	3.52	3.06	chk2	2	ActD Erlotinib	0.50 0.50	0.6	2	Erlotinib SAHA	0.50 0.50	0.46	0.14
24	2	0.24	0.76	0	0	0	0	0	0	2	Erlotinib SAHA	0.50 0.50	0.48	2	CBL IRT	0.50 0.50	3.52	3.04	chk2	2	ActD Erlotinib	0.50 0.50	0.64	2	Erlotinib SAHA	0.50 0.50	0.48	0.16
25	2	0.25	0.75	0	0	0	0	0	0	2	Erlotinib SAHA	0.50 0.50	0.48	2	CBL IRT	0.50 0.50	3.52	3.04	chk2	2	ActD Erlotinib	0.50 0.50	0.66	2	Erlotinib SAHA	0.50 0.50	0.48	0.18
26	2	0.26	0.74	0	0	0	0	0	0	2	Erlotinib SAHA	0.50 0.50	0.5	2	CBL IRT	0.50 0.50	3.52	3.02	chk2	2	ActD Erlotinib	0.50 0.50	0.68	2	Erlotinib SAHA	0.50 0.50	0.5	0.18
27	2	0.27	0.73	0	0	0	0	0	0	2	Erlotinib SAHA	0.50 0.50	0.52	2	CBL IRT	0.50 0.50	3.52	3	chk2	2	ActD Erlotinib	0.50 0.50	0.7	2	Erlotinib SAHA	0.50 0.50	0.52	0.18
28	2	0.28	0.72	0	0	0	0	0	0	2	Erlotinib SAHA	0.50 0.50	0.52	2	CBL IRT	0.50 0.50	3.52	3	chk2	2	ActD Erlotinib	0.50 0.50	0.74	2	Erlotinib SAHA	0.50 0.50	0.52	0.22
29	2	0.29	0.71	0	0	0	0	0	0	2	Erlotinib SAHA	0.50 0.50	0.54	2	CBL IRT	0.50 0.50	3.52	2.98	chk2	2	ActD Erlotinib	0.50 0.50	0.76	2	Erlotinib SAHA	0.50 0.50	0.54	0.22
30	2	0.3	0.7	0	0	0	0	0	0	2	Erlotinib SAHA	0.50 0.50	0.56	2	CBL IRT	0.50 0.50	3.52	2.96	chk2	2	ActD Erlotinib	0.50 0.50	0.78	2	Erlotinib SAHA	0.50 0.50	0.56	0.22
31	2	0.31	0.69	0	0	0	0	0	0	2	Vin SAHA	0.50 0.50	0.56	2	CBL IRT	0.50 0.50	3.52	2.96	chk2	2	ActD Erlotinib	0.50 0.50	0.82	2	Vin SAHA	0.50 0.50	0.56	0.26
32	2	0.32	0.68	0	0	0	0	0	0	2	Vin SAHA	0.50 0.50	0.56	2	CBL IRT	0.50 0.50	3.54	2.98	chk2	2	ActD Erlotinib	0.50 0.50	0.84	2	Vin SAHA	0.50 0.50	0.56	0.28
33	2	0.33	0.67	0	0	0	0	0	0	2	Vin SAHA	0.50 0.50	0.56	2	CBL IRT	0.50 0.50	3.54	2.98	chk2	2	ActD Erlotinib	0.50 0.50	0.86	2	Vin SAHA	0.50 0.50	0.56	0.3
34	2	0.34	0.66	0	0	0	0	0	0	2	Vin SAHA	0.50 0.50	0.58	2	CBL IRT	0.50 0.50	3.54	2.96	chk2	2	ActD Erlotinib	0.50 0.50	0.9	2	Vin SAHA	0.50 0.50	0.58	0.32
35	2	0.35	0.65	0	0	0	0	0	0	2	Vin SAHA	0.50 0.50	0.58	2	CBL IRT	0.50 0.50	3.54	2.96	chk2	2	ActD Erlotinib	0.50 0.50	0.92	2	Vin SAHA	0.50 0.50	0.58	0.34
36	2	0.36	0.64	0	0	0	0	0	0	2	Vin SAHA	0.50 0.50	0.58	2	CBL IRT	0.50 0.50	3.54	2.96	chk2	2	ActD Erlotinib	0.50 0.50	0.94	2	Vin SAHA	0.50 0.50	0.58	0.36
37	2	0.37	0.63	0	0	0	0	0	0	2	Vin SAHA	0.50 0.50	0.58	2	CBL IRT	0.50 0.50	3.54	2.96	chk2	2	ActD Erlotinib	0.50 0.50	0.98	2	Vin SAHA	0.50 0.50	0.58	0.4
38	2	0.38	0.62	0	0	0	0	0	0	2	Vin SAHA	0.50 0.50	0.6	2	CBL IRT	0.50 0.50	3.54	2.94	chk2	2	ActD Erlotinib	0.50 0.50	1	2	Vin SAHA	0.50 0.50	0.6	0.4
39	2	0.39	0.61	0	0	0	0	0	0	2	Vin SAHA	0.50 0.50	0.6	2	CBL IRT	0.50 0.50	3.54	2.94	chk2	2	ActD Erlotinib	0.50 0.50	1.02	2	Vin SAHA	0.50 0.50	0.6	0.42
40	2	0.4	0.6	0	0	0	0	0	0	2	Vin SAHA	0.50 0.50	0.6	2	CBL IRT	0.50 0.50	3.54	2.94	chk2	2	ActD Erlotinib	0.50 0.50	1.04	2	Vin SAHA	0.50 0.50	0.6	0.44
41	2	0.41	0.59	0	0	0	0	0	0	2	Vin SAHA	0.50 0.50	0.6	2	CBL IRT	0.50 0.50	3.54	2.94	chk2	2	ActD Erlotinib	0.50 0.50	1.08	2	Vin SAHA	0.50 0.50	0.6	0.48
42	2	0.42	0.58	0	0	0	0	0	0	2	Vin SAHA	0.50 0.50	0.62	2	CBL IRT	0.50 0.50	3.54	2.92	chk2	2	ActD Erlotinib	0.50 0.50	1.1	2	Vin SAHA	0.50 0.50	0.62	0.48
43	2	0.43	0.57	0	0	0	0	0	0	2	Vin SAHA	0.50 0.50	0.62	2	CBL IRT	0.50 0.50	3.54	2.92	chk2	2	ActD Erlotinib	0.50 0.50	1.12	2	Vin SAHA	0.50 0.50	0.62	0.5
44	2	0.44	0.56	0	0	0	0	0	0	2	Vin SAHA	0.50 0.50	0.62	2	CBL IRT	0.50 0.50	3.56	2.94	chk2	2	ActD Erlotinib	0.50 0.50	1.16	2	Vin SAHA	0.50 0.50	0.62	0.54
45	2	0.45	0.55	0	0	0	0	0	0	2	Vin SAHA	0.50 0.50	0.62	2	CBL IRT	0.50 0.50	3.56	2.94	chk2	2	ActD Erlotinib	0.50 0.50	1.18	2	Vin SAHA	0.50 0.50	0.62	0.56
46	2	0.46	0.54	0	0	0	0	0	0	2	Vin SAHA	0.50 0.50	0.64	2	CBL IRT	0.50 0.50	3.56	2.92	chk2	2	ActD Erlotinib	0.50 0.50	1.2	2	Vin SAHA	0.50 0.50	0.64	0.56
47	2	0.47	0.53	0	0	0	0	0	0	2	Vin SAHA	0.50 0.50	0.64	2	CBL IRT	0.50 0.50	3.56	2.92	chk2	2	ActD Erlotinib	0.50 0.50	1.24	2	Vin SAHA	0.50 0.50	0.64	0.6
48	2	0.48	0.52	0	0	0	0	0	0	2	Vin SAHA	0.50 0.50	0.64	2	CBL IRT	0.50 0.50	3.56	2.92	chk2	2	ActD Erlotinib	0.50 0.50	1.26	2	Vin SAHA	0.50 0.50	0.64	0.62
49	2	0.49	0.51	0	0	0	0	0	0	2	Vin SAHA	0.50 0.50	0.64	2	CBL IRT	0.50 0.50	3.56	2.92	chk2	2	ActD Erlotinib	0.50 0.50	1.28	2	Vin SAHA	0.50 0.50	0.64	0.64
50	2	0.5	0.5	0	0	0	0	0	0	2	Vin SAHA	0.50 0.50	0.66	2	CBL IRT	0.50 0.50	3.56	2.9	chk2	2	ActD Erlotinib	0.50 0.50	1.32	2	Vin SAHA	0.50 0.50	0.66	0.66
51	2	0.51	0.49	0	0	0	0	0	0	2	Vin SAHA	0.50 0.50	0.66	2	CBL IRT	0.50 0.50	3.56	2.9	p53	2	Sunitinib SAHA	0.50 0.50	0.76	2	Vin SAHA	0.50 0.50	0.66	0.1
52	2	0.52	0.48	0	0	0	0	0	0	2	Vin SAHA	0.50 0.50	0.66	2	CBL IRT	0.50 0.50	3.56	2.9	p53	2	Sunitinib SAHA	0.50 0.50	0.76	2	Vin SAHA	0.50 0.50	0.66	0.1
53	2	0.53	0.47	0	0	0	0	0	0	2	Vin SAHA	0.50 0.50	0.66	2	CBL IRT	0.50 0.50	3.56	2.9	p53	2	Sunitinib SAHA	0.50 0.50	0.76	2	Vin SAHA	0.50 0.50	0.66	0.1
54	2	0.54	0.46	0	0	0	0	0	0	2	Vin SAHA	0.50 0.50	0.68	2	CBL IRT	0.50 0.50	3.56	2.88	p53	2	Sunitinib SAHA	0.50 0.50	0.76	2	Vin SAHA	0.50 0.50	0.68	0.08
55	2	0.55	0.45	0	0	0	0	0	0	2	Vin SAHA	0.50 0.50	0.68	2	CBL IRT	0.50 0.50	3.58	2.9	p53	2	Sunitinib SAHA	0.50 0.50	0.74	2	Vin SAHA	0.50 0.50	0.68	0.06
56	2	0.56	0.44	0	0	0	0	0	0	2	Vin SAHA	0.50 0.50	0.68	2	CBL IRT	0.50 0.50	3.58	2.9	p53	2	Sunitinib SAHA	0.50 0.50	0.74	2	Vin SAHA	0.50 0.50	0.68	0.06
57	2	0.57	0.43	0	0	0	0	0	0	2	Vin SAHA	0.50 0.50	0.68	2	CBL IRT	0.50 0.50	3.58	2.9	p53	2	Sunitinib SAHA	0.50 0.50	0.74	2	Vin SAHA	0.50 0.50	0.68	0.06
58	2	0.58	0.42	0	0	0	0	0	0	2	Vin SAHA	0.50 0.50	0.7	2	CBL IRT	0.50 0.50	3.58	2.88	p53	2	Sunitinib SAHA	0.50 0.50	0.74	2	Vin SAHA	0.50 0.50	0.7	0.04
59	2	0.59	0.41	0	0	0	0	0	0	2	Vin SAHA	0.50 0.50	0.7	2	CBL IRT	0.50 0.50	3.58	2.88	p53	2	Sunitinib SAHA	0.50 0.50	0.74	2	Vin SAHA	0.50 0.50	0.7	0.04
60	2	0.6	0.4	0	0	0	0	0	0	2	Vin SAHA	0.50 0.50	0.7	2	CBL IRT	0.50 0.50	3.58	2.88	p53	2	Sunitinib SAHA	0.50 0.50	0.74	2	Vin SAHA	0.50 0.50	0.7	0.04
61	2	0.61	0.39	0	0	0	0	0	0	2	Vin SAHA	0.50 0.50	0.7	2	CBL IRT	0.50 0.50	3.58	2.88	p53	2	Sunitinib SAHA	0.50 0.50	0.74	2	Vin SAHA	0.50 0.50	0.7	0.04
62	2	0.62	0.38	0	0	0	0	0	0	2	Vin SAHA	0.50 0.50	0.72	2	CBL IRT	0.50 0.50	3.58	2.86	p53	2	Sunitinib SAHA	0.50 0.50	0.72	2	Vin SAHA	0.50 0.50	0.72	0
63	2	0.63	0.37	0	0	0	0	0	0	2	Vin SAHA	0.50 0.50	0.72	2	CBL IRT	0.50 0.50	3.58	2.86	p53	2	Sunitinib SAHA	0.50 0.50	0.72	2	Vin SAHA	0.50 0.50	0.72	0
64	2	0.64	0.36	0	0	0	0	0	0	2	Sunitinib SAHA	0.50 0.50	0.72	2	CBL IRT	0.50 0.50	3.58	2.86	p53	2	Sunitinib SAHA	0.50 0.50	0.72	2	Sunitinib SAHA	0.50 0.50	0.72	0
65	2	0.65	0.35	0	0	0	0	0	0	2	Sunitinib SAHA	0.50 0.50	0.72	2	CBL IRT	0.50 0.50	3.58	2.86	p53	2	Sunitinib SAHA	0.50 0.50	0.72	2	Sunitinib SAHA	0.50 0.50	0.72	0
66	2	0.66	0.34	0	0	0	0	0	0	2	Sunitinib SAHA	0.50 0.50	0.72	2	CBL IRT	0.50 0.50	3.58	2.86	p53	2	Sunitinib SAHA	0.50 0.50	0.72	2	Sunitinib SAHA	0.50 0.50	0.72	0
67	2	0.67	0.33	0	0	0	0	0	0	2	Sunitinib SAHA	0.50 0.50	0.72	2	CBL IRT	0.50 0.50	3.6	2.88	p53	2	Sunitinib SAHA	0.50 0.50	0.72	2	Sunitinib SAHA	0.50 0.50	0.72	0
68	2	0.68	0.32	0	0	0	0	0	0	2	Sunitinib SAHA	0.50 0.50	0.72	2	CBL IRT	0.50 0.50	3.6	2.88	p53	2	Sunitinib SAHA	0.50 0.50	0.72	2	Sunitinib SAHA	0.50 0.50	0.72	0
69	2	0.69	0.31	0	0	0	0	0	0	2	Sunitinib SAHA	0.50 0.50	0.7	2	CBL IRT	0.50 0.50	3.6	2.9	p53	2	Sunitinib SAHA	0.50 0.50	0.7	2	Sunitinib SAHA	0.50 0.50	0.7	0
70	2	0.7	0.3	0	0	0	0	0	0	2	Sunitinib SAHA	0.50 0.50	0.7	2	CBL IRT	0.50 0.50	3.6	2.9	p53	2	Sunitinib SAHA	0.50 0.50	0.7	2	Sunitinib SAHA	0.50 0.50	0.7	0
71	2	0.71	0.29	0	0	0	0	0	0	2	Sunitinib SAHA	0.50 0.50	0.7	2	CBL IRT	0.50 0.50	3.6	2.9	p53	2	Sunitinib SAHA	0.50 0.50	0.7	2	Sunitinib SAHA	0.50 0.50	0.7	0
72	2	0.72	0.28	0	0	0	0	0	0	2	Sunitinib SAHA	0.50 0.50	0.7	2	CBL IRT	0.50 0.50	3.6	2.9	p53	2	Sunitinib SAHA	0.50 0.50	0.7	2	Sunitinib SAHA	0.50 0.50	0.7	0
73	2	0.73	0.27	0	0	0	0	0	0	2	Sunitinib SAHA	0.50 0.50	0.7	2	CBL IRT	0.50 0.50	3.6	2.9	p53	2	Sunitinib SAHA	0.50 0.50	0.7	2	Sunitinib SAHA	0.50 0.50	0.7	0
74	2	0.74	0.26	0	0	0	0	0	0	2	Sunitinib SAHA	0.50 0.50	0.7	2	CBL IRT	0.50 0.50	3.6	2.9	p53	2	Sunitinib SAHA	0.50 0.50	0.7	2	Sunitinib SAHA	0.50 0.50	0.7	0
75	2	0.75	0.25	0	0	0	0	0	0	2	Sunitinib SAHA	0.50 0.50	0.7	2	CBL IRT	0.50 0.50	3.6	2.9	p53	2	Sunitinib SAHA	0.50 0.50	0.7	2	Sunitinib SAHA	0.50 0.50	0.7	0
76	2	0.76	0.24	0	0	0	0	0	0	2	Sunitinib SAHA	0.50 0.50	0.68	2	CBL IRT	0.50 0.50	3.6	2.92	p53	2	Sunitinib SAHA	0.50 0.50	0.68	2	Sunitinib SAHA	0.50 0.50	0.68	0
77	2	0.77	0.23	0	0	0	0	0	0	2	Sunitinib SAHA	0.50 0.50	0.68	2	CBL IRT	0.50 0.50	3.6	2.92	p53	2	Sunitinib SAHA	0.50 0.50	0.68	2	Sunitinib SAHA	0.50 0.50	0.68	0
78	2	0.78	0.22	0	0	0	0	0	0	2	Sunitinib SAHA	0.50 0.50	0.68	2	CBL IRT	0.50 0.50	3.62	2.94	p53	2	Sunitinib SAHA	0.50 0.50	0.68	2	Sunitinib SAHA	0.50 0.50	0.68	0
79	2	0.79	0.21	0	0	0	0	0	0	2	Sunitinib SAHA	0.50 0.50	0.68	2	CBL IRT	0.50 0.50	3.62	2.94	p53	2	Sunitinib SAHA	0.50 0.50	0.68	2	Sunitinib SAHA	0.50 0.50	0.68	0
80	2	0.8	0.2	0	0	0	0	0	0	2	Sunitinib SAHA	0.50 0.50	0.68	2	CBL IRT	0.50 0.50	3.62	2.94	p53	2	Sunitinib SAHA	0.50 0.50	0.68	2	Sunitinib SAHA	0.50 0.50	0.68	0
81	2	0.81	0.19	0	0	0	0	0	0	2	Sunitinib SAHA	0.50 0.50	0.68	2	CBL IRT	0.50 0.50	3.62	2.94	p53	2	Sunitinib SAHA	0.50 0.50	0.68	2	Sunitinib SAHA	0.50 0.50	0.68	0
82	2	0.82	0.18	0	0	0	0	0	0	2	Sunitinib SAHA	0.50 0.50	0.68	2	CBL IRT	0.50 0.50	3.62	2.94	p53	2	Sunitinib SAHA	0.50 0.50	0.68	2	Sunitinib SAHA	0.50 0.50	0.68	0
83	2	0.83	0.17	0	0	0	0	0	0	2	Sunitinib SAHA	0.50 0.50	0.66	2	CBL IRT	0.50 0.50	3.62	2.96	p53	2	Sunitinib SAHA	0.50 0.50	0.66	2	Sunitinib SAHA	0.50 0.50	0.66	0
84	2	0.84	0.16	0	0	0	0	0	0	2	Sunitinib SAHA	0.50 0.50	0.66	2	CBL IRT	0.50 0.50	3.62	2.96	p53	2	Sunitinib SAHA	0.50 0.50	0.66	2	Sunitinib SAHA	0.50 0.50	0.66	0
85	2	0.85	0.15	0	0	0	0	0	0	2	Sunitinib SAHA	0.50 0.50	0.66	2	CBL IRT	0.50 0.50	3.62	2.96	p53	2	Sunitinib SAHA	0.50 0.50	0.66	2	Sunitinib SAHA	0.50 0.50	0.66	0
86	2	0.86	0.14	0	0	0	0	0	0	2	Sunitinib SAHA	0.50 0.50	0.66	2	CBL IRT	0.50 0.50	3.62	2.96	p53	2	Sunitinib SAHA	0.50 0.50	0.66	2	Sunitinib SAHA	0.50 0.50	0.66	0
87	2	0.87	0.13	0	0	0	0	0	0	2	Sunitinib SAHA	0.50 0.50	0.66	2	CBL IRT	0.50 0.50	3.62	2.96	p53	2	Sunitinib SAHA	0.50 0.50	0.66	2	Sunitinib SAHA	0.50 0.50	0.66	0
88	2	0.88	0.12	0	0	0	0	0	0	2	Sunitinib SAHA	0.50 0.50	0.66	2	CBL IRT	0.50 0.50	3.62	2.96	p53	2	Sunitinib SAHA	0.50 0.50	0.66	2	Sunitinib SAHA	0.50 0.50	0.66	0
89	2	0.89	0.11	0	0	0	0	0	0	2	Sunitinib SAHA	0.50 0.50	0.66	2	CBL IRT	0.50 0.50	3.64	2.98	p53	2	Sunitinib SAHA	0.50 0.50	0.66	2	Sunitinib SAHA	0.50 0.50	0.66	0
90	2	0.9	0.1	0	0	0	0	0	0	2	Sunitinib SAHA	0.50 0.50	0.66	2	CBL IRT	0.50 0.50	3.64	2.98	p53	2	Sunitinib SAHA	0.50 0.50	0.66	2	Sunitinib SAHA	0.50 0.50	0.66	0
91	2	0.91	0.09	0	0	0	0	0	0	2	Sunitinib SAHA	0.50 0.50	0.64	2	CBL IRT	0.50 0.50	3.64	3	p53	2	Sunitinib SAHA	0.50 0.50	0.64	2	Sunitinib SAHA	0.50 0.50	0.64	0
92	2	0.92	0.08	0	0	0	0	0	0	2	Sunitinib SAHA	0.50 0.50	0.64	2	CBL IRT	0.50 0.50	3.64	3	p53	2	Sunitinib SAHA	0.50 0.50	0.64	2	Sunitinib SAHA	0.50 0.50	0.64	0
93	2	0.93	0.07	0	0	0	0	0	0	2	Sunitinib SAHA	0.50 0.50	0.64	2	CBL IRT	0.50 0.50	3.64	3	p53	2	Sunitinib SAHA	0.50 0.50	0.64	2	Sunitinib SAHA	0.50 0.50	0.64	0
94	2	0.94	0.06	0	0	0	0	0	0	2	Sunitinib SAHA	0.50 0.50	0.64	2	CBL IRT	0.50 0.50	3.64	3	p53	2	Sunitinib SAHA	0.50 0.50	0.64	2	Sunitinib SAHA	0.50 0.50	0.64	0
95	2	0.95	0.05	0	0	0	0	0	0	2	Sunitinib SAHA	0.50 0.50	0.64	2	CBL IRT	0.50 0.50	3.64	3	p53	2	Sunitinib SAHA	0.50 0.50	0.64	2	Sunitinib SAHA	0.50 0.50	0.64	0
96	2	0.96	0.04	0	0	0	0	0	0	2	Sunitinib SAHA	0.50 0.50	0.64	2	CBL IRT	0.50 0.50	3.64	3	p53	2	Sunitinib SAHA	0.50 0.50	0.64	2	Sunitinib SAHA	0.50 0.50	0.64	0
97	2	0.97	0.03	0	0	0	0	0	0	2	Sunitinib SAHA	0.50 0.50	0.64	2	CBL IRT	0.50 0.50	3.64	3	p53	2	Sunitinib SAHA	0.50 0.50	0.64	2	Sunitinib SAHA	0.50 0.50	0.64	0
98	2	0.98	0.02	0	0	0	0	0	0	2	Sunitinib SAHA	0.50 0.50	0.62	2	CBL IRT	0.50 0.50	3.64	3.02	p53	2	Sunitinib SAHA	0.50 0.50	0.62	2	Sunitinib SAHA	0.50 0.50	0.62	0
99	2	0.99	0.01	0	0	0	0	0	0	2	Sunitinib SAHA	0.50 0.50	0.62	2	CBL IRT	0.50 0.50	3.64	3.02	p53	2	Sunitinib SAHA	0.50 0.50	0.62	2	Sunitinib SAHA	0.50 0.50	0.62	0
100	2	0.01	0	0.99	0	0	0	0	0	2	5FU SAHA	0.50 0.50	-0.56	2	DOX ActD	0.50 0.50	1.14	1.7	atr	2	5FU SAHA	0.50 0.50	-0.56	2	5FU SAHA	0.50 0.50	-0.56	0
101	2	0.02	0	0.98	0	0	0	0	0	2	5FU SAHA	0.50 0.50	-0.54	2	DOX ActD	0.50 0.50	1.16	1.7	atr	2	5FU SAHA	0.50 0.50	-0.54	2	5FU SAHA	0.50 0.50	-0.54	0
102	2	0.03	0	0.97	0	0	0	0	0	2	5FU SAHA	0.50 0.50	-0.52	2	DOX ActD	0.50 0.50	1.18	1.7	atr	2	5FU SAHA	0.50 0.50	-0.52	2	5FU SAHA	0.50 0.50	-0.52	0
103	2	0.04	0	0.96	0	0	0	0	0	2	5FU SAHA	0.50 0.50	-0.5	2	DOX ActD	0.50 0.50	1.2	1.7	atr	2	5FU SAHA	0.50 0.50	-0.5	2	5FU SAHA	0.50 0.50	-0.5	0
104	2	0.05	0	0.95	0	0	0	0	0	2	5FU SAHA	0.50 0.50	-0.48	2	DOX ActD	0.50 0.50	1.22	1.7	atr	2	5FU SAHA	0.50 0.50	-0.48	2	5FU SAHA	0.50 0.50	-0.48	0
105	2	0.06	0	0.94	0	0	0	0	0	2	5FU SAHA	0.50 0.50	-0.44	2	DOX ActD	0.50 0.50	1.24	1.68	atr	2	5FU SAHA	0.50 0.50	-0.44	2	5FU SAHA	0.50 0.50	-0.44	0
106	2	0.07	0	0.93	0	0	0	0	0	2	5FU SAHA	0.50 0.50	-0.42	2	DOX ActD	0.50 0.50	1.26	1.68	atr	2	5FU SAHA	0.50 0.50	-0.42	2	5FU SAHA	0.50 0.50	-0.42	0
107	2	0.08	0	0.92	0	0	0	0	0	2	5FU SAHA	0.50 0.50	-0.4	2	DOX ActD	0.50 0.50	1.28	1.68	atr	2	5FU SAHA	0.50 0.50	-0.4	2	5FU SAHA	0.50 0.50	-0.4	0
108	2	0.09	0	0.91	0	0	0	0	0	2	5FU SAHA	0.50 0.50	-0.38	2	DOX ActD	0.50 0.50	1.3	1.68	atr	2	5FU SAHA	0.50 0.50	-0.38	2	5FU SAHA	0.50 0.50	-0.38	0
109	2	0.1	0	0.9	0	0	0	0	0	2	5FU SAHA	0.50 0.50	-0.36	2	DOX ActD	0.50 0.50	1.32	1.68	atr	2	5FU SAHA	0.50 0.50	-0.36	2	5FU SAHA	0.50 0.50	-0.36	0
110	2	0.11	0	0.89	0	0	0	0	0	2	5FU SAHA	0.50 0.50	-0.34	2	DOX ActD	0.50 0.50	1.34	1.68	atr	2	5FU SAHA	0.50 0.50	-0.34	2	5FU SAHA	0.50 0.50	-0.34	0
111	2	0.12	0	0.88	0	0	0	0	0	2	5FU SAHA	0.50 0.50	-0.32	2	DOX ActD	0.50 0.50	1.36	1.68	atr	2	5FU SAHA	0.50 0.50	-0.32	2	5FU SAHA	0.50 0.50	-0.32	0
112	2	0.13	0	0.87	0	0	0	0	0	2	5FU SAHA	0.50 0.50	-0.3	2	DOX IRT	0.50 0.50	1.4	1.7	atr	2	5FU SAHA	0.50 0.50	-0.3	2	5FU SAHA	0.50 0.50	-0.3	0
113	2	0.14	0	0.86	0	0	0	0	0	2	5FU SAHA	0.50 0.50	-0.28	2	DOX IRT	0.50 0.50	1.42	1.7	atr	2	5FU SAHA	0.50 0.50	-0.28	2	5FU SAHA	0.50 0.50	-0.28	0
114	2	0.15	0	0.85	0	0	0	0	0	2	5FU SAHA	0.50 0.50	-0.26	2	DOX IRT	0.50 0.50	1.44	1.7	atr	2	5FU SAHA	0.50 0.50	-0.26	2	5FU SAHA	0.50 0.50	-0.26	0
115	2	0.16	0	0.84	0	0	0	0	0	2	5FU SAHA	0.50 0.50	-0.24	2	DOX IRT	0.50 0.50	1.46	1.7	atr	2	5FU SAHA	0.50 0.50	-0.24	2	5FU SAHA	0.50 0.50	-0.24	0
116	2	0.17	0	0.83	0	0	0	0	0	2	5FU SAHA	0.50 0.50	-0.22	2	DOX IRT	0.50 0.50	1.48	1.7	atr	2	5FU SAHA	0.50 0.50	-0.22	2	5FU SAHA	0.50 0.50	-0.22	0
117	2	0.18	0	0.82	0	0	0	0	0	2	5FU SAHA	0.50 0.50	-0.18	2	DOX IRT	0.50 0.50	1.5	1.68	atr	2	5FU SAHA	0.50 0.50	-0.18	2	5FU SAHA	0.50 0.50	-0.18	0
118	2	0.19	0	0.81	0	0	0	0	0	2	5FU SAHA	0.50 0.50	-0.16	2	DOX IRT	0.50 0.50	1.54	1.7	atr	2	5FU SAHA	0.50 0.50	-0.16	2	5FU SAHA	0.50 0.50	-0.16	0
119	2	0.2	0	0.8	0	0	0	0	0	2	5FU SAHA	0.50 0.50	-0.14	2	DOX IRT	0.50 0.50	1.56	1.7	atr	2	5FU SAHA	0.50 0.50	-0.14	2	5FU SAHA	0.50 0.50	-0.14	0
120	2	0.21	0	0.79	0	0	0	0	0	2	5FU SAHA	0.50 0.50	-0.12	2	DOX IRT	0.50 0.50	1.58	1.7	atr	2	5FU SAHA	0.50 0.50	-0.12	2	5FU SAHA	0.50 0.50	-0.12	0
121	2	0.22	0	0.78	0	0	0	0	0	2	5FU SAHA	0.50 0.50	-0.1	2	DOX IRT	0.50 0.50	1.6	1.7	atr	2	5FU SAHA	0.50 0.50	-0.1	2	5FU SAHA	0.50 0.50	-0.1	0
122	2	0.23	0	0.77	0	0	0	0	0	2	5FU SAHA	0.50 0.50	-0.08	2	DOX IRT	0.50 0.50	1.62	1.7	atr	2	5FU SAHA	0.50 0.50	-0.08	2	5FU SAHA	0.50 0.50	-0.08	0
123	2	0.24	0	0.76	0	0	0	0	0	2	5FU SAHA	0.50 0.50	-0.06	2	DOX IRT	0.50 0.50	1.66	1.72	atr	2	5FU SAHA	0.50 0.50	-0.06	2	5FU SAHA	0.50 0.50	-0.06	0
124	2	0.25	0	0.75	0	0	0	0	0	2	5FU SAHA	0.50 0.50	-0.04	2	DOX IRT	0.50 0.50	1.68	1.72	atr	2	5FU SAHA	0.50 0.50	-0.04	2	5FU SAHA	0.50 0.50	-0.04	0
125	2	0.26	0	0.74	0	0	0	0	0	2	5FU SAHA	0.50 0.50	-0.02	2	DOX IRT	0.50 0.50	1.7	1.72	atr	2	5FU SAHA	0.50 0.50	-0.02	2	5FU SAHA	0.50 0.50	-0.02	0
126	2	0.27	0	0.73	0	0	0	0	0	2	5FU SAHA	0.50 0.50	0	2	DOX IRT	0.50 0.50	1.72	1.72	atr	2	5FU SAHA	0.50 0.50	0	2	5FU SAHA	0.50 0.50	0	0
127	2	0.28	0	0.72	0	0	0	0	0	2	5FU SAHA	0.50 0.50	0.02	2	DOX IRT	0.50 0.50	1.74	1.72	atr	2	5FU SAHA	0.50 0.50	0.02	2	5FU SAHA	0.50 0.50	0.02	0
128	2	0.29	0	0.71	0	0	0	0	0	2	Sunitinib SAHA	0.50 0.50	0.04	2	DOX IRT	0.50 0.50	1.76	1.72	atr	2	5FU SAHA	0.50 0.50	0.04	2	Sunitinib SAHA	0.50 0.50	0.04	0
129	2	0.3	0	0.7	0	0	0	0	0	2	Sunitinib SAHA	0.50 0.50	0.04	2	DOX IRT	0.50 0.50	1.8	1.76	atr	2	5FU SAHA	0.50 0.50	0.08	2	Sunitinib SAHA	0.50 0.50	0.04	0.04
130	2	0.31	0	0.69	0	0	0	0	0	2	Sunitinib SAHA	0.50 0.50	0.06	2	DOX IRT	0.50 0.50	1.82	1.76	atr	2	5FU SAHA	0.50 0.50	0.1	2	Sunitinib SAHA	0.50 0.50	0.06	0.04
131	2	0.32	0	0.68	0	0	0	0	0	2	Sunitinib SAHA	0.50 0.50	0.06	2	DOX IRT	0.50 0.50	1.84	1.78	atr	2	5FU SAHA	0.50 0.50	0.12	2	Sunitinib SAHA	0.50 0.50	0.06	0.06
132	2	0.33	0	0.67	0	0	0	0	0	2	Sunitinib SAHA	0.50 0.50	0.08	2	DOX IRT	0.50 0.50	1.86	1.78	atr	2	5FU SAHA	0.50 0.50	0.14	2	Sunitinib SAHA	0.50 0.50	0.08	0.06
133	2	0.34	0	0.66	0	0	0	0	0	2	Sunitinib SAHA	0.50 0.50	0.08	2	DOX IRT	0.50 0.50	1.88	1.8	atr	2	5FU SAHA	0.50 0.50	0.16	2	Sunitinib SAHA	0.50 0.50	0.08	0.08
134	2	0.35	0	0.65	0	0	0	0	0	2	Sunitinib SAHA	0.50 0.50	0.08	2	DOX IRT	0.50 0.50	1.92	1.84	atr	2	5FU SAHA	0.50 0.50	0.18	2	Sunitinib SAHA	0.50 0.50	0.08	0.1
135	2	0.36	0	0.64	0	0	0	0	0	2	Sunitinib SAHA	0.50 0.50	0.1	2	DOX IRT	0.50 0.50	1.94	1.84	atr	2	5FU SAHA	0.50 0.50	0.2	2	Sunitinib SAHA	0.50 0.50	0.1	0.1
136	2	0.37	0	0.63	0	0	0	0	0	2	Sunitinib SAHA	0.50 0.50	0.1	2	DOX IRT	0.50 0.50	1.96	1.86	atr	2	5FU SAHA	0.50 0.50	0.22	2	Sunitinib SAHA	0.50 0.50	0.1	0.12
137	2	0.38	0	0.62	0	0	0	0	0	2	Sunitinib SAHA	0.50 0.50	0.12	2	DOX IRT	0.50 0.50	1.98	1.86	atr	2	5FU SAHA	0.50 0.50	0.24	2	Sunitinib SAHA	0.50 0.50	0.12	0.12
138	2	0.39	0	0.61	0	0	0	0	0	2	Sunitinib SAHA	0.50 0.50	0.12	2	DOX IRT	0.50 0.50	2	1.88	atr	2	5FU SAHA	0.50 0.50	0.26	2	Sunitinib SAHA	0.50 0.50	0.12	0.14
139	2	0.4	0	0.6	0	0	0	0	0	2	Sunitinib SAHA	0.50 0.50	0.14	2	DOX IRT	0.50 0.50	2.04	1.9	atr	2	5FU SAHA	0.50 0.50	0.28	2	Sunitinib SAHA	0.50 0.50	0.14	0.14
140	2	0.41	0	0.59	0	0	0	0	0	2	Sunitinib SAHA	0.50 0.50	0.14	2	DOX IRT	0.50 0.50	2.06	1.92	atr	2	5FU SAHA	0.50 0.50	0.3	2	Sunitinib SAHA	0.50 0.50	0.14	0.16
141	2	0.42	0	0.58	0	0	0	0	0	2	Sunitinib SAHA	0.50 0.50	0.14	2	DOX IRT	0.50 0.50	2.08	1.94	atr	2	5FU SAHA	0.50 0.50	0.34	2	Sunitinib SAHA	0.50 0.50	0.14	0.2
142	2	0.43	0	0.57	0	0	0	0	0	2	Sunitinib SAHA	0.50 0.50	0.16	2	DOX IRT	0.50 0.50	2.1	1.94	atr	2	5FU SAHA	0.50 0.50	0.36	2	Sunitinib SAHA	0.50 0.50	0.16	0.2
143	2	0.44	0	0.56	0	0	0	0	0	2	Sunitinib SAHA	0.50 0.50	0.16	2	DOX IRT	0.50 0.50	2.12	1.96	atr	2	5FU SAHA	0.50 0.50	0.38	2	Sunitinib SAHA	0.50 0.50	0.16	0.22
144	2	0.45	0	0.55	0	0	0	0	0	2	Sunitinib SAHA	0.50 0.50	0.18	2	DOX IRT	0.50 0.50	2.14	1.96	atr	2	5FU SAHA	0.50 0.50	0.4	2	Sunitinib SAHA	0.50 0.50	0.18	0.22
145	2	0.46	0	0.54	0	0	0	0	0	2	Sunitinib SAHA	0.50 0.50	0.18	2	DOX IRT	0.50 0.50	2.18	2	atr	2	5FU SAHA	0.50 0.50	0.42	2	Sunitinib SAHA	0.50 0.50	0.18	0.24
146	2	0.47	0	0.53	0	0	0	0	0	2	Sunitinib SAHA	0.50 0.50	0.18	2	DOX IRT	0.50 0.50	2.2	2.02	atr	2	5FU SAHA	0.50 0.50	0.44	2	Sunitinib SAHA	0.50 0.50	0.18	0.26
147	2	0.48	0	0.52	0	0	0	0	0	2	Sunitinib SAHA	0.50 0.50	0.2	2	DOX IRT	0.50 0.50	2.22	2.02	atr	2	5FU SAHA	0.50 0.50	0.46	2	Sunitinib SAHA	0.50 0.50	0.2	0.26
148	2	0.49	0	0.51	0	0	0	0	0	2	Sunitinib SAHA	0.50 0.50	0.2	2	DOX IRT	0.50 0.50	2.24	2.04	atr	2	5FU SAHA	0.50 0.50	0.48	2	Sunitinib SAHA	0.50 0.50	0.2	0.28
149	2	0.5	0	0.5	0	0	0	0	0	2	Sunitinib SAHA	0.50 0.50	0.22	2	DOX IRT	0.50 0.50	2.26	2.04	atr	2	5FU SAHA	0.50 0.50	0.5	2	Sunitinib SAHA	0.50 0.50	0.22	0.28
150	2	0.51	0	0.49	0	0	0	0	0	2	Sunitinib SAHA	0.50 0.50	0.22	2	DOX IRT	0.50 0.50	2.3	2.08	p53	2	Sunitinib SAHA	0.50 0.50	0.22	2	Sunitinib SAHA	0.50 0.50	0.22	0
151	2	0.52	0	0.48	0	0	0	0	0	2	Sunitinib SAHA	0.50 0.50	0.22	2	DOX IRT	0.50 0.50	2.32	2.1	p53	2	Sunitinib SAHA	0.50 0.50	0.22	2	Sunitinib SAHA	0.50 0.50	0.22	0
152	2	0.53	0	0.47	0	0	0	0	0	2	Sunitinib SAHA	0.50 0.50	0.24	2	DOX IRT	0.50 0.50	2.34	2.1	p53	2	Sunitinib SAHA	0.50 0.50	0.24	2	Sunitinib SAHA	0.50 0.50	0.24	0
153	2	0.54	0	0.46	0	0	0	0	0	2	Sunitinib SAHA	0.50 0.50	0.24	2	DOX IRT	0.50 0.50	2.36	2.12	p53	2	Sunitinib SAHA	0.50 0.50	0.24	2	Sunitinib SAHA	0.50 0.50	0.24	0
154	2	0.55	0	0.45	0	0	0	0	0	2	Sunitinib SAHA	0.50 0.50	0.26	2	DOX IRT	0.50 0.50	2.38	2.12	p53	2	Sunitinib SAHA	0.50 0.50	0.26	2	Sunitinib SAHA	0.50 0.50	0.26	0
155	2	0.56	0	0.44	0	0	0	0	0	2	Sunitinib SAHA	0.50 0.50	0.26	2	DOX IRT	0.50 0.50	2.4	2.14	p53	2	Sunitinib SAHA	0.50 0.50	0.26	2	Sunitinib SAHA	0.50 0.50	0.26	0
156	2	0.57	0	0.43	0	0	0	0	0	2	Sunitinib SAHA	0.50 0.50	0.26	2	DOX IRT	0.50 0.50	2.44	2.18	p53	2	Sunitinib SAHA	0.50 0.50	0.26	2	Sunitinib SAHA	0.50 0.50	0.26	0
157	2	0.58	0	0.42	0	0	0	0	0	2	Sunitinib SAHA	0.50 0.50	0.28	2	DOX IRT	0.50 0.50	2.46	2.18	p53	2	Sunitinib SAHA	0.50 0.50	0.28	2	Sunitinib SAHA	0.50 0.50	0.28	0
158	2	0.59	0	0.41	0	0	0	0	0	2	Sunitinib SAHA	0.50 0.50	0.28	2	DOX IRT	0.50 0.50	2.48	2.2	p53	2	Sunitinib SAHA	0.50 0.50	0.28	2	Sunitinib SAHA	0.50 0.50	0.28	0
159	2	0.6	0	0.4	0	0	0	0	0	2	Sunitinib SAHA	0.50 0.50	0.3	2	DOX IRT	0.50 0.50	2.5	2.2	p53	2	Sunitinib SAHA	0.50 0.50	0.3	2	Sunitinib SAHA	0.50 0.50	0.3	0
160	2	0.61	0	0.39	0	0	0	0	0	2	Sunitinib SAHA	0.50 0.50	0.3	2	DOX IRT	0.50 0.50	2.52	2.22	p53	2	Sunitinib SAHA	0.50 0.50	0.3	2	Sunitinib SAHA	0.50 0.50	0.3	0
161	2	0.62	0	0.38	0	0	0	0	0	2	Sunitinib SAHA	0.50 0.50	0.32	2	DOX IRT	0.50 0.50	2.56	2.24	p53	2	Sunitinib SAHA	0.50 0.50	0.32	2	Sunitinib SAHA	0.50 0.50	0.32	0
162	2	0.63	0	0.37	0	0	0	0	0	2	Sunitinib SAHA	0.50 0.50	0.32	2	DOX IRT	0.50 0.50	2.58	2.26	p53	2	Sunitinib SAHA	0.50 0.50	0.32	2	Sunitinib SAHA	0.50 0.50	0.32	0
163	2	0.64	0	0.36	0	0	0	0	0	2	Sunitinib SAHA	0.50 0.50	0.32	2	DOX IRT	0.50 0.50	2.6	2.28	p53	2	Sunitinib SAHA	0.50 0.50	0.32	2	Sunitinib SAHA	0.50 0.50	0.32	0
164	2	0.65	0	0.35	0	0	0	0	0	2	Sunitinib SAHA	0.50 0.50	0.34	2	DOX IRT	0.50 0.50	2.62	2.28	p53	2	Sunitinib SAHA	0.50 0.50	0.34	2	Sunitinib SAHA	0.50 0.50	0.34	0
165	2	0.66	0	0.34	0	0	0	0	0	2	Sunitinib SAHA	0.50 0.50	0.34	2	DOX IRT	0.50 0.50	2.64	2.3	p53	2	Sunitinib SAHA	0.50 0.50	0.34	2	Sunitinib SAHA	0.50 0.50	0.34	0
166	2	0.67	0	0.33	0	0	0	0	0	2	Sunitinib SAHA	0.50 0.50	0.36	2	DOX IRT	0.50 0.50	2.66	2.3	p53	2	Sunitinib SAHA	0.50 0.50	0.36	2	Sunitinib SAHA	0.50 0.50	0.36	0
167	2	0.68	0	0.32	0	0	0	0	0	2	Sunitinib SAHA	0.50 0.50	0.36	2	DOX IRT	0.50 0.50	2.7	2.34	p53	2	Sunitinib SAHA	0.50 0.50	0.36	2	Sunitinib SAHA	0.50 0.50	0.36	0
168	2	0.69	0	0.31	0	0	0	0	0	2	Sunitinib SAHA	0.50 0.50	0.36	2	DOX IRT	0.50 0.50	2.72	2.36	p53	2	Sunitinib SAHA	0.50 0.50	0.36	2	Sunitinib SAHA	0.50 0.50	0.36	0
169	2	0.7	0	0.3	0	0	0	0	0	2	Sunitinib SAHA	0.50 0.50	0.38	2	DOX IRT	0.50 0.50	2.74	2.36	p53	2	Sunitinib SAHA	0.50 0.50	0.38	2	Sunitinib SAHA	0.50 0.50	0.38	0
170	2	0.71	0	0.29	0	0	0	0	0	2	Sunitinib SAHA	0.50 0.50	0.38	2	DOX IRT	0.50 0.50	2.76	2.38	p53	2	Sunitinib SAHA	0.50 0.50	0.38	2	Sunitinib SAHA	0.50 0.50	0.38	0
171	2	0.72	0	0.28	0	0	0	0	0	2	Sunitinib SAHA	0.50 0.50	0.4	2	DOX IRT	0.50 0.50	2.78	2.38	p53	2	Sunitinib SAHA	0.50 0.50	0.4	2	Sunitinib SAHA	0.50 0.50	0.4	0
172	2	0.73	0	0.27	0	0	0	0	0	2	Sunitinib SAHA	0.50 0.50	0.4	2	DOX IRT	0.50 0.50	2.82	2.42	p53	2	Sunitinib SAHA	0.50 0.50	0.4	2	Sunitinib SAHA	0.50 0.50	0.4	0
173	2	0.74	0	0.26	0	0	0	0	0	2	Sunitinib SAHA	0.50 0.50	0.4	2	DOX IRT	0.50 0.50	2.84	2.44	p53	2	Sunitinib SAHA	0.50 0.50	0.4	2	Sunitinib SAHA	0.50 0.50	0.4	0
174	2	0.75	0	0.25	0	0	0	0	0	2	Sunitinib SAHA	0.50 0.50	0.42	2	DOX IRT	0.50 0.50	2.86	2.44	p53	2	Sunitinib SAHA	0.50 0.50	0.42	2	Sunitinib SAHA	0.50 0.50	0.42	0
175	2	0.76	0	0.24	0	0	0	0	0	2	Sunitinib SAHA	0.50 0.50	0.42	2	DOX IRT	0.50 0.50	2.88	2.46	p53	2	Sunitinib SAHA	0.50 0.50	0.42	2	Sunitinib SAHA	0.50 0.50	0.42	0
176	2	0.77	0	0.23	0	0	0	0	0	2	Sunitinib SAHA	0.50 0.50	0.44	2	DOX IRT	0.50 0.50	2.9	2.46	p53	2	Sunitinib SAHA	0.50 0.50	0.44	2	Sunitinib SAHA	0.50 0.50	0.44	0
177	2	0.78	0	0.22	0	0	0	0	0	2	Sunitinib SAHA	0.50 0.50	0.44	2	CBL IRT	0.50 0.50	2.94	2.5	p53	2	Sunitinib SAHA	0.50 0.50	0.44	2	Sunitinib SAHA	0.50 0.50	0.44	0
178	2	0.79	0	0.21	0	0	0	0	0	2	Sunitinib SAHA	0.50 0.50	0.44	2	CBL IRT	0.50 0.50	2.98	2.54	p53	2	Sunitinib SAHA	0.50 0.50	0.44	2	Sunitinib SAHA	0.50 0.50	0.44	0
179	2	0.8	0	0.2	0	0	0	0	0	2	Sunitinib SAHA	0.50 0.50	0.46	2	CBL IRT	0.50 0.50	3	2.54	p53	2	Sunitinib SAHA	0.50 0.50	0.46	2	Sunitinib SAHA	0.50 0.50	0.46	0
180	2	0.81	0	0.19	0	0	0	0	0	2	Sunitinib SAHA	0.50 0.50	0.46	2	CBL IRT	0.50 0.50	3.04	2.58	p53	2	Sunitinib SAHA	0.50 0.50	0.46	2	Sunitinib SAHA	0.50 0.50	0.46	0
181	2	0.82	0	0.18	0	0	0	0	0	2	Sunitinib SAHA	0.50 0.50	0.48	2	CBL IRT	0.50 0.50	3.06	2.58	p53	2	Sunitinib SAHA	0.50 0.50	0.48	2	Sunitinib SAHA	0.50 0.50	0.48	0
182	2	0.83	0	0.17	0	0	0	0	0	2	Sunitinib SAHA	0.50 0.50	0.48	2	CBL IRT	0.50 0.50	3.1	2.62	p53	2	Sunitinib SAHA	0.50 0.50	0.48	2	Sunitinib SAHA	0.50 0.50	0.48	0
183	2	0.84	0	0.16	0	0	0	0	0	2	Sunitinib SAHA	0.50 0.50	0.5	2	CBL IRT	0.50 0.50	3.14	2.64	p53	2	Sunitinib SAHA	0.50 0.50	0.5	2	Sunitinib SAHA	0.50 0.50	0.5	0
184	2	0.85	0	0.15	0	0	0	0	0	2	Sunitinib SAHA	0.50 0.50	0.5	2	CBL IRT	0.50 0.50	3.16	2.66	p53	2	Sunitinib SAHA	0.50 0.50	0.5	2	Sunitinib SAHA	0.50 0.50	0.5	0
185	2	0.86	0	0.14	0	0	0	0	0	2	Sunitinib SAHA	0.50 0.50	0.5	2	CBL IRT	0.50 0.50	3.2	2.7	p53	2	Sunitinib SAHA	0.50 0.50	0.5	2	Sunitinib SAHA	0.50 0.50	0.5	0
186	2	0.87	0	0.13	0	0	0	0	0	2	Sunitinib SAHA	0.50 0.50	0.52	2	CBL IRT	0.50 0.50	3.22	2.7	p53	2	Sunitinib SAHA	0.50 0.50	0.52	2	Sunitinib SAHA	0.50 0.50	0.52	0
187	2	0.88	0	0.12	0	0	0	0	0	2	Sunitinib SAHA	0.50 0.50	0.52	2	CBL IRT	0.50 0.50	3.26	2.74	p53	2	Sunitinib SAHA	0.50 0.50	0.52	2	Sunitinib SAHA	0.50 0.50	0.52	0
188	2	0.89	0	0.11	0	0	0	0	0	2	Sunitinib SAHA	0.50 0.50	0.54	2	CBL IRT	0.50 0.50	3.3	2.76	p53	2	Sunitinib SAHA	0.50 0.50	0.54	2	Sunitinib SAHA	0.50 0.50	0.54	0
189	2	0.9	0	0.1	0	0	0	0	0	2	Sunitinib SAHA	0.50 0.50	0.54	2	CBL IRT	0.50 0.50	3.32	2.78	p53	2	Sunitinib SAHA	0.50 0.50	0.54	2	Sunitinib SAHA	0.50 0.50	0.54	0
190	2	0.91	0	0.09	0	0	0	0	0	2	Sunitinib SAHA	0.50 0.50	0.54	2	CBL IRT	0.50 0.50	3.36	2.82	p53	2	Sunitinib SAHA	0.50 0.50	0.54	2	Sunitinib SAHA	0.50 0.50	0.54	0
191	2	0.92	0	0.08	0	0	0	0	0	2	Sunitinib SAHA	0.50 0.50	0.56	2	CBL IRT	0.50 0.50	3.4	2.84	p53	2	Sunitinib SAHA	0.50 0.50	0.56	2	Sunitinib SAHA	0.50 0.50	0.56	0
192	2	0.93	0	0.07	0	0	0	0	0	2	Sunitinib SAHA	0.50 0.50	0.56	2	CBL IRT	0.50 0.50	3.42	2.86	p53	2	Sunitinib SAHA	0.50 0.50	0.56	2	Sunitinib SAHA	0.50 0.50	0.56	0
193	2	0.94	0	0.06	0	0	0	0	0	2	Sunitinib SAHA	0.50 0.50	0.58	2	CBL IRT	0.50 0.50	3.46	2.88	p53	2	Sunitinib SAHA	0.50 0.50	0.58	2	Sunitinib SAHA	0.50 0.50	0.58	0
194	2	0.95	0	0.05	0	0	0	0	0	2	Sunitinib SAHA	0.50 0.50	0.58	2	CBL IRT	0.50 0.50	3.48	2.9	p53	2	Sunitinib SAHA	0.50 0.50	0.58	2	Sunitinib SAHA	0.50 0.50	0.58	0
195	2	0.96	0	0.04	0	0	0	0	0	2	Sunitinib SAHA	0.50 0.50	0.58	2	CBL IRT	0.50 0.50	3.52	2.94	p53	2	Sunitinib SAHA	0.50 0.50	0.58	2	Sunitinib SAHA	0.50 0.50	0.58	0
196	2	0.97	0	0.03	0	0	0	0	0	2	Sunitinib SAHA	0.50 0.50	0.6	2	CBL IRT	0.50 0.50	3.56	2.96	p53	2	Sunitinib SAHA	0.50 0.50	0.6	2	Sunitinib SAHA	0.50 0.50	0.6	0
197	2	0.98	0	0.02	0	0	0	0	0	2	Sunitinib SAHA	0.50 0.50	0.6	2	CBL IRT	0.50 0.50	3.58	2.98	p53	2	Sunitinib SAHA	0.50 0.50	0.6	2	Sunitinib SAHA	0.50 0.50	0.6	0
198	2	0.99	0	0.01	0	0	0	0	0	2	Sunitinib SAHA	0.50 0.50	0.62	2	CBL IRT	0.50 0.50	3.62	3	p53	2	Sunitinib SAHA	0.50 0.50	0.62	2	Sunitinib SAHA	0.50 0.50	0.62	0
199	2	0.01	0	0	0.99	0	0	0	0	2	CBL 5FU	0.50 0.50	-1.62	2	DOX Sunitinib	0.50 0.50	-0.02	1.6	chk1	2	CBL 5FU	0.50 0.50	-1.62	2	CBL 5FU	0.50 0.50	-1.62	0
200	2	0.02	0	0	0.98	0	0	0	0	2	CBL 5FU	0.50 0.50	-1.58	2	DOX Sunitinib	0.50 0.50	0	1.58	chk1	2	CBL 5FU	0.50 0.50	-1.58	2	CBL 5FU	0.50 0.50	-1.58	0
201	2	0.03	0	0	0.97	0	0	0	0	2	CBL 5FU	0.50 0.50	-1.54	2	DOX Sunitinib	0.50 0.50	0.02	1.56	chk1	2	CBL 5FU	0.50 0.50	-1.54	2	CBL 5FU	0.50 0.50	-1.54	0
202	2	0.04	0	0	0.96	0	0	0	0	2	CBL 5FU	0.50 0.50	-1.48	2	DOX Sunitinib	0.50 0.50	0.04	1.52	chk1	2	CBL 5FU	0.50 0.50	-1.48	2	CBL 5FU	0.50 0.50	-1.48	0
203	2	0.05	0	0	0.95	0	0	0	0	2	CBL 5FU	0.50 0.50	-1.44	2	DOX Sunitinib	0.50 0.50	0.06	1.5	chk1	2	CBL 5FU	0.50 0.50	-1.44	2	CBL 5FU	0.50 0.50	-1.44	0
204	2	0.06	0	0	0.94	0	0	0	0	2	CBL 5FU	0.50 0.50	-1.4	2	DOX Sunitinib	0.50 0.50	0.08	1.48	chk1	2	CBL 5FU	0.50 0.50	-1.4	2	CBL 5FU	0.50 0.50	-1.4	0
205	2	0.07	0	0	0.93	0	0	0	0	2	CBL 5FU	0.50 0.50	-1.34	2	DOX Sunitinib	0.50 0.50	0.1	1.44	chk1	2	CBL 5FU	0.50 0.50	-1.34	2	CBL 5FU	0.50 0.50	-1.34	0
206	2	0.08	0	0	0.92	0	0	0	0	2	CBL 5FU	0.50 0.50	-1.3	2	DOX Sunitinib	0.50 0.50	0.12	1.42	chk1	2	CBL 5FU	0.50 0.50	-1.3	2	CBL 5FU	0.50 0.50	-1.3	0
207	2	0.09	0	0	0.91	0	0	0	0	2	CBL 5FU	0.50 0.50	-1.24	2	DOX Sunitinib	0.50 0.50	0.14	1.38	chk1	2	CBL 5FU	0.50 0.50	-1.24	2	CBL 5FU	0.50 0.50	-1.24	0
208	2	0.1	0	0	0.9	0	0	0	0	2	CBL 5FU	0.50 0.50	-1.2	2	DOX Sunitinib	0.50 0.50	0.16	1.36	chk1	2	CBL 5FU	0.50 0.50	-1.2	2	CBL 5FU	0.50 0.50	-1.2	0
209	2	0.11	0	0	0.89	0	0	0	0	2	CBL 5FU	0.50 0.50	-1.16	2	DOX ActD	0.50 0.50	0.18	1.34	chk1	2	CBL 5FU	0.50 0.50	-1.16	2	CBL 5FU	0.50 0.50	-1.16	0
210	2	0.12	0	0	0.88	0	0	0	0	2	CBL 5FU	0.50 0.50	-1.1	2	DOX ActD	0.50 0.50	0.22	1.32	chk1	2	CBL 5FU	0.50 0.50	-1.1	2	CBL 5FU	0.50 0.50	-1.1	0
211	2	0.13	0	0	0.87	0	0	0	0	2	CBL 5FU	0.50 0.50	-1.06	2	DOX ActD	0.50 0.50	0.24	1.3	chk1	2	CBL 5FU	0.50 0.50	-1.06	2	CBL 5FU	0.50 0.50	-1.06	0
212	2	0.14	0	0	0.86	0	0	0	0	2	CBL 5FU	0.50 0.50	-1	2	DOX ActD	0.50 0.50	0.28	1.28	chk1	2	CBL 5FU	0.50 0.50	-1	2	CBL 5FU	0.50 0.50	-1	0
213	2	0.15	0	0	0.85	0	0	0	0	2	CBL 5FU	0.50 0.50	-0.96	2	DOX ActD	0.50 0.50	0.32	1.28	chk1	2	CBL 5FU	0.50 0.50	-0.96	2	CBL 5FU	0.50 0.50	-0.96	0
214	2	0.16	0	0	0.84	0	0	0	0	2	5FU SAHA	0.50 0.50	-0.92	2	DOX ActD	0.50 0.50	0.34	1.26	chk1	2	CBL 5FU	0.50 0.50	-0.92	2	5FU SAHA	0.50 0.50	-0.92	0
215	2	0.17	0	0	0.83	0	0	0	0	2	5FU SAHA	0.50 0.50	-0.88	2	DOX ActD	0.50 0.50	0.38	1.26	chk1	2	CBL 5FU	0.50 0.50	-0.86	2	5FU SAHA	0.50 0.50	-0.88	0.02
216	2	0.18	0	0	0.82	0	0	0	0	2	5FU SAHA	0.50 0.50	-0.86	2	DOX ActD	0.50 0.50	0.42	1.28	chk1	2	CBL 5FU	0.50 0.50	-0.82	2	5FU SAHA	0.50 0.50	-0.86	0.04
217	2	0.19	0	0	0.81	0	0	0	0	2	5FU SAHA	0.50 0.50	-0.82	2	DOX ActD	0.50 0.50	0.44	1.26	chk1	2	CBL 5FU	0.50 0.50	-0.76	2	5FU SAHA	0.50 0.50	-0.82	0.06
218	2	0.2	0	0	0.8	0	0	0	0	2	5FU SAHA	0.50 0.50	-0.8	2	DOX ActD	0.50 0.50	0.48	1.28	chk1	2	CBL 5FU	0.50 0.50	-0.72	2	5FU SAHA	0.50 0.50	-0.8	0.08
219	2	0.21	0	0	0.79	0	0	0	0	2	5FU SAHA	0.50 0.50	-0.76	2	DOX ActD	0.50 0.50	0.52	1.28	chk1	2	CBL 5FU	0.50 0.50	-0.68	2	5FU SAHA	0.50 0.50	-0.76	0.08
220	2	0.22	0	0	0.78	0	0	0	0	2	5FU SAHA	0.50 0.50	-0.74	2	DOX ActD	0.50 0.50	0.54	1.28	chk1	2	CBL 5FU	0.50 0.50	-0.62	2	5FU SAHA	0.50 0.50	-0.74	0.12
221	2	0.23	0	0	0.77	0	0	0	0	2	5FU SAHA	0.50 0.50	-0.7	2	DOX ActD	0.50 0.50	0.58	1.28	chk1	2	CBL 5FU	0.50 0.50	-0.58	2	5FU SAHA	0.50 0.50	-0.7	0.12
222	2	0.24	0	0	0.76	0	0	0	0	2	5FU SAHA	0.50 0.50	-0.68	2	DOX ActD	0.50 0.50	0.62	1.3	chk1	2	CBL 5FU	0.50 0.50	-0.54	2	5FU SAHA	0.50 0.50	-0.68	0.14
223	2	0.25	0	0	0.75	0	0	0	0	2	5FU SAHA	0.50 0.50	-0.64	2	DOX ActD	0.50 0.50	0.64	1.28	chk1	2	CBL 5FU	0.50 0.50	-0.48	2	5FU SAHA	0.50 0.50	-0.64	0.16
224	2	0.26	0	0	0.74	0	0	0	0	2	5FU SAHA	0.50 0.50	-0.62	2	DOX ActD	0.50 0.50	0.68	1.3	chk1	2	CBL 5FU	0.50 0.50	-0.44	2	5FU SAHA	0.50 0.50	-0.62	0.18
225	2	0.27	0	0	0.73	0	0	0	0	2	5FU SAHA	0.50 0.50	-0.58	2	DOX ActD	0.50 0.50	0.72	1.3	chk1	2	CBL 5FU	0.50 0.50	-0.38	2	5FU SAHA	0.50 0.50	-0.58	0.2
226	2	0.28	0	0	0.72	0	0	0	0	2	5FU SAHA	0.50 0.50	-0.56	2	DOX ActD	0.50 0.50	0.74	1.3	chk1	2	CBL 5FU	0.50 0.50	-0.34	2	5FU SAHA	0.50 0.50	-0.56	0.22
227	2	0.29	0	0	0.71	0	0	0	0	2	5FU SAHA	0.50 0.50	-0.52	2	DOX ActD	0.50 0.50	0.78	1.3	chk1	2	CBL 5FU	0.50 0.50	-0.3	2	5FU SAHA	0.50 0.50	-0.52	0.22
228	2	0.3	0	0	0.7	0	0	0	0	2	5FU SAHA	0.50 0.50	-0.5	2	DOX ActD	0.50 0.50	0.82	1.32	chk1	2	CBL 5FU	0.50 0.50	-0.24	2	5FU SAHA	0.50 0.50	-0.5	0.26
229	2	0.31	0	0	0.69	0	0	0	0	2	5FU SAHA	0.50 0.50	-0.46	2	DOX ActD	0.50 0.50	0.84	1.3	chk1	2	CBL 5FU	0.50 0.50	-0.2	2	5FU SAHA	0.50 0.50	-0.46	0.26
230	2	0.32	0	0	0.68	0	0	0	0	2	5FU SAHA	0.50 0.50	-0.44	2	DOX ActD	0.50 0.50	0.88	1.32	chk1	2	CBL 5FU	0.50 0.50	-0.14	2	5FU SAHA	0.50 0.50	-0.44	0.3
231	2	0.33	0	0	0.67	0	0	0	0	2	5FU SAHA	0.50 0.50	-0.4	2	DOX ActD	0.50 0.50	0.92	1.32	chk1	2	CBL 5FU	0.50 0.50	-0.1	2	5FU SAHA	0.50 0.50	-0.4	0.3
232	2	0.34	0	0	0.66	0	0	0	0	2	5FU SAHA	0.50 0.50	-0.38	2	DOX ActD	0.50 0.50	0.94	1.32	chk1	2	CBL 5FU	0.50 0.50	-0.06	2	5FU SAHA	0.50 0.50	-0.38	0.32
233	2	0.35	0	0	0.65	0	0	0	0	2	5FU SAHA	0.50 0.50	-0.34	2	DOX ActD	0.50 0.50	0.98	1.32	chk1	2	CBL 5FU	0.50 0.50	0	2	5FU SAHA	0.50 0.50	-0.34	0.34
234	2	0.36	0	0	0.64	0	0	0	0	2	5FU SAHA	0.50 0.50	-0.32	2	DOX ActD	0.50 0.50	1.02	1.34	chk1	2	CBL 5FU	0.50 0.50	0.04	2	5FU SAHA	0.50 0.50	-0.32	0.36
235	2	0.37	0	0	0.63	0	0	0	0	2	5FU SAHA	0.50 0.50	-0.28	2	DOX ActD	0.50 0.50	1.04	1.32	chk1	2	CBL 5FU	0.50 0.50	0.1	2	5FU SAHA	0.50 0.50	-0.28	0.38
236	2	0.38	0	0	0.62	0	0	0	0	2	5FU SAHA	0.50 0.50	-0.26	2	DOX ActD	0.50 0.50	1.08	1.34	chk1	2	CBL 5FU	0.50 0.50	0.14	2	5FU SAHA	0.50 0.50	-0.26	0.4
237	2	0.39	0	0	0.61	0	0	0	0	2	5FU SAHA	0.50 0.50	-0.22	2	DOX ActD	0.50 0.50	1.12	1.34	chk1	2	CBL 5FU	0.50 0.50	0.18	2	5FU SAHA	0.50 0.50	-0.22	0.4
238	2	0.4	0	0	0.6	0	0	0	0	2	5FU SAHA	0.50 0.50	-0.2	2	DOX ActD	0.50 0.50	1.14	1.34	chk1	2	CBL 5FU	0.50 0.50	0.24	2	5FU SAHA	0.50 0.50	-0.2	0.44
239	2	0.41	0	0	0.59	0	0	0	0	2	5FU SAHA	0.50 0.50	-0.16	2	DOX ActD	0.50 0.50	1.18	1.34	chk1	2	CBL 5FU	0.50 0.50	0.28	2	5FU SAHA	0.50 0.50	-0.16	0.44
240	2	0.42	0	0	0.58	0	0	0	0	2	5FU SAHA	0.50 0.50	-0.14	2	DOX ActD	0.50 0.50	1.22	1.36	chk1	2	CBL 5FU	0.50 0.50	0.32	2	5FU SAHA	0.50 0.50	-0.14	0.46
241	2	0.43	0	0	0.57	0	0	0	0	2	5FU SAHA	0.50 0.50	-0.1	2	DOX ActD	0.50 0.50	1.24	1.34	chk1	2	CBL 5FU	0.50 0.50	0.38	2	5FU SAHA	0.50 0.50	-0.1	0.48
242	2	0.44	0	0	0.56	0	0	0	0	2	5FU SAHA	0.50 0.50	-0.08	2	DOX ActD	0.50 0.50	1.28	1.36	chk1	2	CBL 5FU	0.50 0.50	0.42	2	5FU SAHA	0.50 0.50	-0.08	0.5
243	2	0.45	0	0	0.55	0	0	0	0	2	5FU SAHA	0.50 0.50	-0.04	2	DOX ActD	0.50 0.50	1.32	1.36	chk1	2	CBL 5FU	0.50 0.50	0.48	2	5FU SAHA	0.50 0.50	-0.04	0.52
244	2	0.46	0	0	0.54	0	0	0	0	2	5FU SAHA	0.50 0.50	-0.02	2	DOX ActD	0.50 0.50	1.34	1.36	chk1	2	CBL 5FU	0.50 0.50	0.52	2	5FU SAHA	0.50 0.50	-0.02	0.54
245	2	0.47	0	0	0.53	0	0	0	0	2	5FU SAHA	0.50 0.50	0.02	2	DOX ActD	0.50 0.50	1.38	1.36	chk1	2	CBL 5FU	0.50 0.50	0.56	2	5FU SAHA	0.50 0.50	0.02	0.54
246	2	0.48	0	0	0.52	0	0	0	0	2	5FU SAHA	0.50 0.50	0.04	2	DOX ActD	0.50 0.50	1.42	1.38	chk1	2	CBL 5FU	0.50 0.50	0.62	2	5FU SAHA	0.50 0.50	0.04	0.58
247	2	0.49	0	0	0.51	0	0	0	0	2	5FU SAHA	0.50 0.50	0.06	2	DOX ActD	0.50 0.50	1.44	1.38	chk1	2	CBL 5FU	0.50 0.50	0.66	2	5FU SAHA	0.50 0.50	0.06	0.6
248	2	0.5	0	0	0.5	0	0	0	0	2	Vin SAHA	0.50 0.50	0.1	2	DOX ActD	0.50 0.50	1.48	1.38	chk1	2	CBL 5FU	0.50 0.50	0.72	2	Vin SAHA	0.50 0.50	0.1	0.62
249	2	0.51	0	0	0.49	0	0	0	0	2	Vin SAHA	0.50 0.50	0.1	2	DOX ActD	0.50 0.50	1.52	1.42	p53	2	Sunitinib SAHA	0.50 0.50	0.12	2	Vin SAHA	0.50 0.50	0.1	0.02
250	2	0.52	0	0	0.48	0	0	0	0	2	Vin SAHA	0.50 0.50	0.12	2	DOX ActD	0.50 0.50	1.54	1.42	p53	2	Sunitinib SAHA	0.50 0.50	0.14	2	Vin SAHA	0.50 0.50	0.12	0.02
251	2	0.53	0	0	0.47	0	0	0	0	2	Vin SAHA	0.50 0.50	0.14	2	DOX ActD	0.50 0.50	1.58	1.44	p53	2	Sunitinib SAHA	0.50 0.50	0.14	2	Vin SAHA	0.50 0.50	0.14	0
252	2	0.54	0	0	0.46	0	0	0	0	2	Vin SAHA	0.50 0.50	0.16	2	DOX ActD	0.50 0.50	1.62	1.46	p53	2	Sunitinib SAHA	0.50 0.50	0.16	2	Vin SAHA	0.50 0.50	0.16	0
253	2	0.55	0	0	0.45	0	0	0	0	2	Sunitinib SAHA	0.50 0.50	0.16	2	DOX ActD	0.50 0.50	1.64	1.48	p53	2	Sunitinib SAHA	0.50 0.50	0.16	2	Sunitinib SAHA	0.50 0.50	0.16	0
254	2	0.56	0	0	0.44	0	0	0	0	2	Sunitinib SAHA	0.50 0.50	0.18	2	DOX ActD	0.50 0.50	1.68	1.5	p53	2	Sunitinib SAHA	0.50 0.50	0.18	2	Sunitinib SAHA	0.50 0.50	0.18	0
255	2	0.57	0	0	0.43	0	0	0	0	2	Sunitinib SAHA	0.50 0.50	0.18	2	DOX ActD	0.50 0.50	1.72	1.54	p53	2	Sunitinib SAHA	0.50 0.50	0.18	2	Sunitinib SAHA	0.50 0.50	0.18	0
256	2	0.58	0	0	0.42	0	0	0	0	2	Sunitinib SAHA	0.50 0.50	0.2	2	DOX ActD	0.50 0.50	1.74	1.54	p53	2	Sunitinib SAHA	0.50 0.50	0.2	2	Sunitinib SAHA	0.50 0.50	0.2	0
257	2	0.59	0	0	0.41	0	0	0	0	2	Sunitinib SAHA	0.50 0.50	0.2	2	DOX IRT	0.50 0.50	1.78	1.58	p53	2	Sunitinib SAHA	0.50 0.50	0.2	2	Sunitinib SAHA	0.50 0.50	0.2	0
258	2	0.6	0	0	0.4	0	0	0	0	2	Sunitinib SAHA	0.50 0.50	0.22	2	DOX IRT	0.50 0.50	1.82	1.6	p53	2	Sunitinib SAHA	0.50 0.50	0.22	2	Sunitinib SAHA	0.50 0.50	0.22	0
259	2	0.61	0	0	0.39	0	0	0	0	2	Sunitinib SAHA	0.50 0.50	0.22	2	DOX IRT	0.50 0.50	1.86	1.64	p53	2	Sunitinib SAHA	0.50 0.50	0.22	2	Sunitinib SAHA	0.50 0.50	0.22	0
260	2	0.62	0	0	0.38	0	0	0	0	2	Sunitinib SAHA	0.50 0.50	0.24	2	DOX IRT	0.50 0.50	1.9	1.66	p53	2	Sunitinib SAHA	0.50 0.50	0.24	2	Sunitinib SAHA	0.50 0.50	0.24	0
261	2	0.63	0	0	0.37	0	0	0	0	2	Sunitinib SAHA	0.50 0.50	0.24	2	DOX IRT	0.50 0.50	1.94	1.7	p53	2	Sunitinib SAHA	0.50 0.50	0.24	2	Sunitinib SAHA	0.50 0.50	0.24	0
262	2	0.64	0	0	0.36	0	0	0	0	2	Sunitinib SAHA	0.50 0.50	0.26	2	DOX IRT	0.50 0.50	1.98	1.72	p53	2	Sunitinib SAHA	0.50 0.50	0.26	2	Sunitinib SAHA	0.50 0.50	0.26	0
263	2	0.65	0	0	0.35	0	0	0	0	2	Sunitinib SAHA	0.50 0.50	0.26	2	DOX IRT	0.50 0.50	2.02	1.76	p53	2	Sunitinib SAHA	0.50 0.50	0.26	2	Sunitinib SAHA	0.50 0.50	0.26	0
264	2	0.66	0	0	0.34	0	0	0	0	2	Sunitinib SAHA	0.50 0.50	0.28	2	DOX IRT	0.50 0.50	2.06	1.78	p53	2	Sunitinib SAHA	0.50 0.50	0.28	2	Sunitinib SAHA	0.50 0.50	0.28	0
265	2	0.67	0	0	0.33	0	0	0	0	2	Sunitinib SAHA	0.50 0.50	0.28	2	DOX IRT	0.50 0.50	2.1	1.82	p53	2	Sunitinib SAHA	0.50 0.50	0.28	2	Sunitinib SAHA	0.50 0.50	0.28	0
266	2	0.68	0	0	0.32	0	0	0	0	2	Sunitinib SAHA	0.50 0.50	0.3	2	DOX IRT	0.50 0.50	2.14	1.84	p53	2	Sunitinib SAHA	0.50 0.50	0.3	2	Sunitinib SAHA	0.50 0.50	0.3	0
267	2	0.69	0	0	0.31	0	0	0	0	2	Sunitinib SAHA	0.50 0.50	0.3	2	DOX IRT	0.50 0.50	2.2	1.9	p53	2	Sunitinib SAHA	0.50 0.50	0.3	2	Sunitinib SAHA	0.50 0.50	0.3	0
268	2	0.7	0	0	0.3	0	0	0	0	2	Sunitinib SAHA	0.50 0.50	0.32	2	DOX IRT	0.50 0.50	2.24	1.92	p53	2	Sunitinib SAHA	0.50 0.50	0.32	2	Sunitinib SAHA	0.50 0.50	0.32	0
269	2	0.71	0	0	0.29	0	0	0	0	2	Sunitinib SAHA	0.50 0.50	0.34	2	DOX IRT	0.50 0.50	2.28	1.94	p53	2	Sunitinib SAHA	0.50 0.50	0.34	2	Sunitinib SAHA	0.50 0.50	0.34	0
270	2	0.72	0	0	0.28	0	0	0	0	2	Sunitinib SAHA	0.50 0.50	0.34	2	DOX IRT	0.50 0.50	2.32	1.98	p53	2	Sunitinib SAHA	0.50 0.50	0.34	2	Sunitinib SAHA	0.50 0.50	0.34	0
271	2	0.73	0	0	0.27	0	0	0	0	2	Sunitinib SAHA	0.50 0.50	0.36	2	DOX IRT	0.50 0.50	2.36	2	p53	2	Sunitinib SAHA	0.50 0.50	0.36	2	Sunitinib SAHA	0.50 0.50	0.36	0
272	2	0.74	0	0	0.26	0	0	0	0	2	Sunitinib SAHA	0.50 0.50	0.36	2	DOX IRT	0.50 0.50	2.4	2.04	p53	2	Sunitinib SAHA	0.50 0.50	0.36	2	Sunitinib SAHA	0.50 0.50	0.36	0
273	2	0.75	0	0	0.25	0	0	0	0	2	Sunitinib SAHA	0.50 0.50	0.38	2	DOX IRT	0.50 0.50	2.44	2.06	p53	2	Sunitinib SAHA	0.50 0.50	0.38	2	Sunitinib SAHA	0.50 0.50	0.38	0
274	2	0.76	0	0	0.24	0	0	0	0	2	Sunitinib SAHA	0.50 0.50	0.38	2	DOX IRT	0.50 0.50	2.48	2.1	p53	2	Sunitinib SAHA	0.50 0.50	0.38	2	Sunitinib SAHA	0.50 0.50	0.38	0
275	2	0.77	0	0	0.23	0	0	0	0	2	Sunitinib SAHA	0.50 0.50	0.4	2	CBL IRT	0.50 0.50	2.52	2.12	p53	2	Sunitinib SAHA	0.50 0.50	0.4	2	Sunitinib SAHA	0.50 0.50	0.4	0
276	2	0.78	0	0	0.22	0	0	0	0	2	Sunitinib SAHA	0.50 0.50	0.4	2	CBL IRT	0.50 0.50	2.58	2.18	p53	2	Sunitinib SAHA	0.50 0.50	0.4	2	Sunitinib SAHA	0.50 0.50	0.4	0
277	2	0.79	0	0	0.21	0	0	0	0	2	Sunitinib SAHA	0.50 0.50	0.42	2	CBL IRT	0.50 0.50	2.62	2.2	p53	2	Sunitinib SAHA	0.50 0.50	0.42	2	Sunitinib SAHA	0.50 0.50	0.42	0
278	2	0.8	0	0	0.2	0	0	0	0	2	Sunitinib SAHA	0.50 0.50	0.42	2	CBL IRT	0.50 0.50	2.66	2.24	p53	2	Sunitinib SAHA	0.50 0.50	0.42	2	Sunitinib SAHA	0.50 0.50	0.42	0
279	2	0.81	0	0	0.19	0	0	0	0	2	Sunitinib SAHA	0.50 0.50	0.44	2	CBL IRT	0.50 0.50	2.72	2.28	p53	2	Sunitinib SAHA	0.50 0.50	0.44	2	Sunitinib SAHA	0.50 0.50	0.44	0
280	2	0.82	0	0	0.18	0	0	0	0	2	Sunitinib SAHA	0.50 0.50	0.44	2	CBL IRT	0.50 0.50	2.76	2.32	p53	2	Sunitinib SAHA	0.50 0.50	0.44	2	Sunitinib SAHA	0.50 0.50	0.44	0
281	2	0.83	0	0	0.17	0	0	0	0	2	Sunitinib SAHA	0.50 0.50	0.46	2	CBL IRT	0.50 0.50	2.82	2.36	p53	2	Sunitinib SAHA	0.50 0.50	0.46	2	Sunitinib SAHA	0.50 0.50	0.46	0
282	2	0.84	0	0	0.16	0	0	0	0	2	Sunitinib SAHA	0.50 0.50	0.46	2	CBL IRT	0.50 0.50	2.86	2.4	p53	2	Sunitinib SAHA	0.50 0.50	0.46	2	Sunitinib SAHA	0.50 0.50	0.46	0
283	2	0.85	0	0	0.15	0	0	0	0	2	Sunitinib SAHA	0.50 0.50	0.48	2	CBL IRT	0.50 0.50	2.92	2.44	p53	2	Sunitinib SAHA	0.50 0.50	0.48	2	Sunitinib SAHA	0.50 0.50	0.48	0
284	2	0.86	0	0	0.14	0	0	0	0	2	Sunitinib SAHA	0.50 0.50	0.48	2	CBL IRT	0.50 0.50	2.96	2.48	p53	2	Sunitinib SAHA	0.50 0.50	0.48	2	Sunitinib SAHA	0.50 0.50	0.48	0
285	2	0.87	0	0	0.13	0	0	0	0	2	Sunitinib SAHA	0.50 0.50	0.5	2	CBL IRT	0.50 0.50	3.02	2.52	p53	2	Sunitinib SAHA	0.50 0.50	0.5	2	Sunitinib SAHA	0.50 0.50	0.5	0
286	2	0.88	0	0	0.12	0	0	0	0	2	Sunitinib SAHA	0.50 0.50	0.5	2	CBL IRT	0.50 0.50	3.06	2.56	p53	2	Sunitinib SAHA	0.50 0.50	0.5	2	Sunitinib SAHA	0.50 0.50	0.5	0
287	2	0.89	0	0	0.11	0	0	0	0	2	Sunitinib SAHA	0.50 0.50	0.52	2	CBL IRT	0.50 0.50	3.12	2.6	p53	2	Sunitinib SAHA	0.50 0.50	0.52	2	Sunitinib SAHA	0.50 0.50	0.52	0
288	2	0.9	0	0	0.1	0	0	0	0	2	Sunitinib SAHA	0.50 0.50	0.52	2	CBL IRT	0.50 0.50	3.16	2.64	p53	2	Sunitinib SAHA	0.50 0.50	0.52	2	Sunitinib SAHA	0.50 0.50	0.52	0
289	2	0.91	0	0	0.09	0	0	0	0	2	Sunitinib SAHA	0.50 0.50	0.54	2	CBL IRT	0.50 0.50	3.2	2.66	p53	2	Sunitinib SAHA	0.50 0.50	0.54	2	Sunitinib SAHA	0.50 0.50	0.54	0
290	2	0.92	0	0	0.08	0	0	0	0	2	Sunitinib SAHA	0.50 0.50	0.54	2	CBL IRT	0.50 0.50	3.26	2.72	p53	2	Sunitinib SAHA	0.50 0.50	0.54	2	Sunitinib SAHA	0.50 0.50	0.54	0
291	2	0.93	0	0	0.07	0	0	0	0	2	Sunitinib SAHA	0.50 0.50	0.56	2	CBL IRT	0.50 0.50	3.3	2.74	p53	2	Sunitinib SAHA	0.50 0.50	0.56	2	Sunitinib SAHA	0.50 0.50	0.56	0
292	2	0.94	0	0	0.06	0	0	0	0	2	Sunitinib SAHA	0.50 0.50	0.56	2	CBL IRT	0.50 0.50	3.36	2.8	p53	2	Sunitinib SAHA	0.50 0.50	0.56	2	Sunitinib SAHA	0.50 0.50	0.56	0
293	2	0.95	0	0	0.05	0	0	0	0	2	Sunitinib SAHA	0.50 0.50	0.58	2	CBL IRT	0.50 0.50	3.4	2.82	p53	2	Sunitinib SAHA	0.50 0.50	0.58	2	Sunitinib SAHA	0.50 0.50	0.58	0
294	2	0.96	0	0	0.04	0	0	0	0	2	Sunitinib SAHA	0.50 0.50	0.58	2	CBL IRT	0.50 0.50	3.46	2.88	p53	2	Sunitinib SAHA	0.50 0.50	0.58	2	Sunitinib SAHA	0.50 0.50	0.58	0
295	2	0.97	0	0	0.03	0	0	0	0	2	Sunitinib SAHA	0.50 0.50	0.6	2	CBL IRT	0.50 0.50	3.5	2.9	p53	2	Sunitinib SAHA	0.50 0.50	0.6	2	Sunitinib SAHA	0.50 0.50	0.6	0
296	2	0.98	0	0	0.02	0	0	0	0	2	Sunitinib SAHA	0.50 0.50	0.6	2	CBL IRT	0.50 0.50	3.56	2.96	p53	2	Sunitinib SAHA	0.50 0.50	0.6	2	Sunitinib SAHA	0.50 0.50	0.6	0
297	2	0.99	0	0	0.01	0	0	0	0	2	Sunitinib SAHA	0.50 0.50	0.62	2	CBL IRT	0.50 0.50	3.6	2.98	p53	2	Sunitinib SAHA	0.50 0.50	0.62	2	Sunitinib SAHA	0.50 0.50	0.62	0
298	2	0.01	0	0	0	0.99	0	0	0	2	DOX SAHA	0.50 0.50	-1.98	2	IRT Sunitinib	0.50 0.50	0.36	2.34	atx	2	DOX SAHA	0.50 0.50	-1.98	2	DOX SAHA	0.50 0.50	-1.98	0
299	2	0.02	0	0	0	0.98	0	0	0	2	DOX SAHA	0.50 0.50	-1.94	2	IRT Sunitinib	0.50 0.50	0.38	2.32	atx	2	DOX SAHA	0.50 0.50	-1.94	2	DOX SAHA	0.50 0.50	-1.94	0
300	2	0.03	0	0	0	0.97	0	0	0	2	DOX SAHA	0.50 0.50	-1.9	2	IRT Sunitinib	0.50 0.50	0.4	2.3	atx	2	DOX SAHA	0.50 0.50	-1.9	2	DOX SAHA	0.50 0.50	-1.9	0
301	2	0.04	0	0	0	0.96	0	0	0	2	DOX SAHA	0.50 0.50	-1.86	2	IRT Sunitinib	0.50 0.50	0.42	2.28	atx	2	DOX SAHA	0.50 0.50	-1.86	2	DOX SAHA	0.50 0.50	-1.86	0
302	2	0.05	0	0	0	0.95	0	0	0	2	DOX SAHA	0.50 0.50	-1.82	2	IRT Sunitinib	0.50 0.50	0.44	2.26	atx	2	DOX SAHA	0.50 0.50	-1.82	2	DOX SAHA	0.50 0.50	-1.82	0
303	2	0.06	0	0	0	0.94	0	0	0	2	DOX SAHA	0.50 0.50	-1.78	2	IRT Sunitinib	0.50 0.50	0.46	2.24	atx	2	DOX SAHA	0.50 0.50	-1.78	2	DOX SAHA	0.50 0.50	-1.78	0
304	2	0.07	0	0	0	0.93	0	0	0	2	DOX SAHA	0.50 0.50	-1.74	2	IRT Sunitinib	0.50 0.50	0.48	2.22	atx	2	DOX SAHA	0.50 0.50	-1.74	2	DOX SAHA	0.50 0.50	-1.74	0
305	2	0.08	0	0	0	0.92	0	0	0	2	DOX SAHA	0.50 0.50	-1.7	2	IRT Sunitinib	0.50 0.50	0.48	2.18	atx	2	DOX SAHA	0.50 0.50	-1.7	2	DOX SAHA	0.50 0.50	-1.7	0
306	2	0.09	0	0	0	0.91	0	0	0	2	DOX SAHA	0.50 0.50	-1.66	2	IRT Sunitinib	0.50 0.50	0.5	2.16	atx	2	DOX SAHA	0.50 0.50	-1.66	2	DOX SAHA	0.50 0.50	-1.66	0
307	2	0.1	0	0	0	0.9	0	0	0	2	DOX SAHA	0.50 0.50	-1.62	2	IRT Sunitinib	0.50 0.50	0.52	2.14	atx	2	DOX SAHA	0.50 0.50	-1.62	2	DOX SAHA	0.50 0.50	-1.62	0
308	2	0.11	0	0	0	0.89	0	0	0	2	DOX SAHA	0.50 0.50	-1.58	2	IRT Sunitinib	0.50 0.50	0.54	2.12	atx	2	DOX SAHA	0.50 0.50	-1.58	2	DOX SAHA	0.50 0.50	-1.58	0
309	2	0.12	0	0	0	0.88	0	0	0	2	DOX SAHA	0.50 0.50	-1.54	2	IRT Sunitinib	0.50 0.50	0.56	2.1	atx	2	DOX SAHA	0.50 0.50	-1.54	2	DOX SAHA	0.50 0.50	-1.54	0
310	2	0.13	0	0	0	0.87	0	0	0	2	DOX SAHA	0.50 0.50	-1.5	2	5FU IRT	0.50 0.50	0.58	2.08	atx	2	DOX SAHA	0.50 0.50	-1.5	2	DOX SAHA	0.50 0.50	-1.5	0
311	2	0.14	0	0	0	0.86	0	0	0	2	DOX SAHA	0.50 0.50	-1.46	2	5FU IRT	0.50 0.50	0.62	2.08	atx	2	DOX SAHA	0.50 0.50	-1.46	2	DOX SAHA	0.50 0.50	-1.46	0
312	2	0.15	0	0	0	0.85	0	0	0	2	DOX SAHA	0.50 0.50	-1.42	2	5FU IRT	0.50 0.50	0.64	2.06	atx	2	DOX SAHA	0.50 0.50	-1.42	2	DOX SAHA	0.50 0.50	-1.42	0
313	2	0.16	0	0	0	0.84	0	0	0	2	DOX SAHA	0.50 0.50	-1.38	2	5FU IRT	0.50 0.50	0.68	2.06	atx	2	DOX SAHA	0.50 0.50	-1.38	2	DOX SAHA	0.50 0.50	-1.38	0
314	2	0.17	0	0	0	0.83	0	0	0	2	DOX SAHA	0.50 0.50	-1.34	2	5FU IRT	0.50 0.50	0.7	2.04	atx	2	DOX SAHA	0.50 0.50	-1.34	2	DOX SAHA	0.50 0.50	-1.34	0
315	2	0.18	0	0	0	0.82	0	0	0	2	DOX SAHA	0.50 0.50	-1.3	2	5FU IRT	0.50 0.50	0.72	2.02	atx	2	DOX SAHA	0.50 0.50	-1.3	2	DOX SAHA	0.50 0.50	-1.3	0
316	2	0.19	0	0	0	0.81	0	0	0	2	DOX SAHA	0.50 0.50	-1.26	2	5FU IRT	0.50 0.50	0.76	2.02	atx	2	DOX SAHA	0.50 0.50	-1.26	2	DOX SAHA	0.50 0.50	-1.26	0
317	2	0.2	0	0	0	0.8	0	0	0	2	DOX SAHA	0.50 0.50	-1.22	2	5FU IRT	0.50 0.50	0.78	2	atx	2	DOX SAHA	0.50 0.50	-1.22	2	DOX SAHA	0.50 0.50	-1.22	0
318	2	0.21	0	0	0	0.79	0	0	0	2	DOX SAHA	0.50 0.50	-1.18	2	5FU IRT	0.50 0.50	0.82	2	atx	2	DOX SAHA	0.50 0.50	-1.18	2	DOX SAHA	0.50 0.50	-1.18	0
319	2	0.22	0	0	0	0.78	0	0	0	2	DOX SAHA	0.50 0.50	-1.14	2	5FU IRT	0.50 0.50	0.84	1.98	atx	2	DOX SAHA	0.50 0.50	-1.14	2	DOX SAHA	0.50 0.50	-1.14	0
320	2	0.23	0	0	0	0.77	0	0	0	2	DOX SAHA	0.50 0.50	-1.1	2	5FU IRT	0.50 0.50	0.88	1.98	atx	2	DOX SAHA	0.50 0.50	-1.1	2	DOX SAHA	0.50 0.50	-1.1	0
321	2	0.24	0	0	0	0.76	0	0	0	2	DOX SAHA	0.50 0.50	-1.06	2	5FU IRT	0.50 0.50	0.9	1.96	atx	2	DOX SAHA	0.50 0.50	-1.06	2	DOX SAHA	0.50 0.50	-1.06	0
322	2	0.25	0	0	0	0.75	0	0	0	2	DOX SAHA	0.50 0.50	-1.02	2	5FU IRT	0.50 0.50	0.92	1.94	atx	2	DOX SAHA	0.50 0.50	-1.02	2	DOX SAHA	0.50 0.50	-1.02	0
323	2	0.26	0	0	0	0.74	0	0	0	2	DOX SAHA	0.50 0.50	-0.98	2	5FU IRT	0.50 0.50	0.96	1.94	atx	2	DOX SAHA	0.50 0.50	-0.98	2	DOX SAHA	0.50 0.50	-0.98	0
324	2	0.27	0	0	0	0.73	0	0	0	2	DOX SAHA	0.50 0.50	-0.94	2	5FU IRT	0.50 0.50	0.98	1.92	atx	2	DOX SAHA	0.50 0.50	-0.94	2	DOX SAHA	0.50 0.50	-0.94	0
325	2	0.28	0	0	0	0.72	0	0	0	2	DOX SAHA	0.50 0.50	-0.9	2	5FU IRT	0.50 0.50	1.02	1.92	atx	2	DOX SAHA	0.50 0.50	-0.9	2	DOX SAHA	0.50 0.50	-0.9	0
326	2	0.29	0	0	0	0.71	0	0	0	2	DOX SAHA	0.50 0.50	-0.86	2	5FU IRT	0.50 0.50	1.04	1.9	atx	2	DOX SAHA	0.50 0.50	-0.86	2	DOX SAHA	0.50 0.50	-0.86	0
327	2	0.3	0	0	0	0.7	0	0	0	2	DOX SAHA	0.50 0.50	-0.82	2	5FU IRT	0.50 0.50	1.08	1.9	atx	2	DOX SAHA	0.50 0.50	-0.82	2	DOX SAHA	0.50 0.50	-0.82	0
328	2	0.31	0	0	0	0.69	0	0	0	2	DOX SAHA	0.50 0.50	-0.78	2	5FU IRT	0.50 0.50	1.1	1.88	atx	2	DOX SAHA	0.50 0.50	-0.78	2	DOX SAHA	0.50 0.50	-0.78	0
329	2	0.32	0	0	0	0.68	0	0	0	2	Vin SAHA	0.50 0.50	-0.76	2	5FU IRT	0.50 0.50	1.12	1.88	atx	2	DOX SAHA	0.50 0.50	-0.74	2	Vin SAHA	0.50 0.50	-0.76	0.02
330	2	0.33	0	0	0	0.67	0	0	0	2	Vin SAHA	0.50 0.50	-0.74	2	5FU IRT	0.50 0.50	1.16	1.9	atx	2	DOX SAHA	0.50 0.50	-0.7	2	Vin SAHA	0.50 0.50	-0.74	0.04
331	2	0.34	0	0	0	0.66	0	0	0	2	Vin SAHA	0.50 0.50	-0.7	2	5FU IRT	0.50 0.50	1.18	1.88	atx	2	DOX SAHA	0.50 0.50	-0.66	2	Vin SAHA	0.50 0.50	-0.7	0.04
332	2	0.35	0	0	0	0.65	0	0	0	2	Vin SAHA	0.50 0.50	-0.68	2	5FU IRT	0.50 0.50	1.22	1.9	atx	2	DOX SAHA	0.50 0.50	-0.62	2	Vin SAHA	0.50 0.50	-0.68	0.06
333	2	0.36	0	0	0	0.64	0	0	0	2	Vin SAHA	0.50 0.50	-0.66	2	5FU IRT	0.50 0.50	1.24	1.9	atx	2	DOX SAHA	0.50 0.50	-0.58	2	Vin SAHA	0.50 0.50	-0.66	0.08
334	2	0.37	0	0	0	0.63	0	0	0	2	Vin SAHA	0.50 0.50	-0.64	2	5FU IRT	0.50 0.50	1.28	1.92	atx	2	DOX SAHA	0.50 0.50	-0.54	2	Vin SAHA	0.50 0.50	-0.64	0.1
335	2	0.38	0	0	0	0.62	0	0	0	2	Vin SAHA	0.50 0.50	-0.6	2	5FU IRT	0.50 0.50	1.3	1.9	atx	2	DOX SAHA	0.50 0.50	-0.5	2	Vin SAHA	0.50 0.50	-0.6	0.1
336	2	0.39	0	0	0	0.61	0	0	0	2	Vin SAHA	0.50 0.50	-0.58	2	5FU IRT	0.50 0.50	1.32	1.9	atx	2	DOX SAHA	0.50 0.50	-0.46	2	Vin SAHA	0.50 0.50	-0.58	0.12
337	2	0.4	0	0	0	0.6	0	0	0	2	Vin SAHA	0.50 0.50	-0.56	2	5FU IRT	0.50 0.50	1.36	1.92	atx	2	DOX SAHA	0.50 0.50	-0.42	2	Vin SAHA	0.50 0.50	-0.56	0.14
338	2	0.41	0	0	0	0.59	0	0	0	2	Vin SAHA	0.50 0.50	-0.54	2	5FU IRT	0.50 0.50	1.38	1.92	atx	2	DOX SAHA	0.50 0.50	-0.38	2	Vin SAHA	0.50 0.50	-0.54	0.16
339	2	0.42	0	0	0	0.58	0	0	0	2	Vin SAHA	0.50 0.50	-0.52	2	5FU IRT	0.50 0.50	1.42	1.94	atx	2	DOX SAHA	0.50 0.50	-0.34	2	Vin SAHA	0.50 0.50	-0.52	0.18
340	2	0.43	0	0	0	0.57	0	0	0	2	Vin SAHA	0.50 0.50	-0.48	2	5FU IRT	0.50 0.50	1.44	1.92	atx	2	DOX SAHA	0.50 0.50	-0.3	2	Vin SAHA	0.50 0.50	-0.48	0.18
341	2	0.44	0	0	0	0.56	0	0	0	2	Vin SAHA	0.50 0.50	-0.46	2	5FU IRT	0.50 0.50	1.48	1.94	atx	2	DOX SAHA	0.50 0.50	-0.26	2	Vin SAHA	0.50 0.50	-0.46	0.2
342	2	0.45	0	0	0	0.55	0	0	0	2	Vin SAHA	0.50 0.50	-0.44	2	5FU IRT	0.50 0.50	1.5	1.94	atx	2	DOX SAHA	0.50 0.50	-0.24	2	Vin SAHA	0.50 0.50	-0.44	0.2
343	2	0.46	0	0	0	0.54	0	0	0	2	Vin SAHA	0.50 0.50	-0.42	2	5FU IRT	0.50 0.50	1.54	1.96	atx	2	DOX SAHA	0.50 0.50	-0.2	2	Vin SAHA	0.50 0.50	-0.42	0.22
344	2	0.47	0	0	0	0.53	0	0	0	2	Vin SAHA	0.50 0.50	-0.38	2	5FU IRT	0.50 0.50	1.56	1.94	atx	2	DOX SAHA	0.50 0.50	-0.16	2	Vin SAHA	0.50 0.50	-0.38	0.22
345	2	0.48	0	0	0	0.52	0	0	0	2	Vin SAHA	0.50 0.50	-0.36	2	5FU IRT	0.50 0.50	1.58	1.94	atx	2	DOX SAHA	0.50 0.50	-0.12	2	Vin SAHA	0.50 0.50	-0.36	0.24
346	2	0.49	0	0	0	0.51	0	0	0	2	Vin SAHA	0.50 0.50	-0.34	2	5FU IRT	0.50 0.50	1.62	1.96	atx	2	DOX SAHA	0.50 0.50	-0.08	2	Vin SAHA	0.50 0.50	-0.34	0.26
347	2	0.5	0	0	0	0.5	0	0	0	2	Vin SAHA	0.50 0.50	-0.32	2	5FU IRT	0.50 0.50	1.64	1.96	atx	2	DOX SAHA	0.50 0.50	-0.04	2	Vin SAHA	0.50 0.50	-0.32	0.28
348	2	0.51	0	0	0	0.49	0	0	0	2	Vin SAHA	0.50 0.50	-0.3	2	5FU IRT	0.50 0.50	1.68	1.98	p53	2	Sunitinib SAHA	0.50 0.50	-0.08	2	Vin SAHA	0.50 0.50	-0.3	0.22
349	2	0.52	0	0	0	0.48	0	0	0	2	Vin SAHA	0.50 0.50	-0.26	2	5FU IRT	0.50 0.50	1.7	1.96	p53	2	Sunitinib SAHA	0.50 0.50	-0.08	2	Vin SAHA	0.50 0.50	-0.26	0.18
350	2	0.53	0	0	0	0.47	0	0	0	2	Vin SAHA	0.50 0.50	-0.24	2	5FU IRT	0.50 0.50	1.74	1.98	p53	2	Sunitinib SAHA	0.50 0.50	-0.06	2	Vin SAHA	0.50 0.50	-0.24	0.18
351	2	0.54	0	0	0	0.46	0	0	0	2	Vin SAHA	0.50 0.50	-0.22	2	5FU IRT	0.50 0.50	1.76	1.98	p53	2	Sunitinib SAHA	0.50 0.50	-0.04	2	Vin SAHA	0.50 0.50	-0.22	0.18
352	2	0.55	0	0	0	0.45	0	0	0	2	Vin SAHA	0.50 0.50	-0.2	2	5FU IRT	0.50 0.50	1.78	1.98	p53	2	Sunitinib SAHA	0.50 0.50	-0.02	2	Vin SAHA	0.50 0.50	-0.2	0.18
353	2	0.56	0	0	0	0.44	0	0	0	2	Vin SAHA	0.50 0.50	-0.18	2	CBL IRT	0.50 0.50	1.82	2	p53	2	Sunitinib SAHA	0.50 0.50	-0.02	2	Vin SAHA	0.50 0.50	-0.18	0.16
354	2	0.57	0	0	0	0.43	0	0	0	2	Vin SAHA	0.50 0.50	-0.14	2	CBL IRT	0.50 0.50	1.86	2	p53	2	Sunitinib SAHA	0.50 0.50	0	2	Vin SAHA	0.50 0.50	-0.14	0.14
355	2	0.58	0	0	0	0.42	0	0	0	2	Vin SAHA	0.50 0.50	-0.12	2	CBL IRT	0.50 0.50	1.9	2.02	p53	2	Sunitinib SAHA	0.50 0.50	0.02	2	Vin SAHA	0.50 0.50	-0.12	0.14
356	2	0.59	0	0	0	0.41	0	0	0	2	Vin SAHA	0.50 0.50	-0.1	2	CBL IRT	0.50 0.50	1.94	2.04	p53	2	Sunitinib SAHA	0.50 0.50	0.04	2	Vin SAHA	0.50 0.50	-0.1	0.14
357	2	0.6	0	0	0	0.4	0	0	0	2	Vin SAHA	0.50 0.50	-0.08	2	CBL IRT	0.50 0.50	1.98	2.06	p53	2	Sunitinib SAHA	0.50 0.50	0.04	2	Vin SAHA	0.50 0.50	-0.08	0.12
358	2	0.61	0	0	0	0.39	0	0	0	2	Vin SAHA	0.50 0.50	-0.04	2	CBL IRT	0.50 0.50	2.02	2.06	p53	2	Sunitinib SAHA	0.50 0.50	0.06	2	Vin SAHA	0.50 0.50	-0.04	0.1
359	2	0.62	0	0	0	0.38	0	0	0	2	Vin SAHA	0.50 0.50	-0.02	2	CBL IRT	0.50 0.50	2.06	2.08	p53	2	Sunitinib SAHA	0.50 0.50	0.08	2	Vin SAHA	0.50 0.50	-0.02	0.1
360	2	0.63	0	0	0	0.37	0	0	0	2	Vin SAHA	0.50 0.50	0	2	CBL IRT	0.50 0.50	2.12	2.12	p53	2	Sunitinib SAHA	0.50 0.50	0.08	2	Vin SAHA	0.50 0.50	0	0.08
361	2	0.64	0	0	0	0.36	0	0	0	2	Vin SAHA	0.50 0.50	0.02	2	CBL IRT	0.50 0.50	2.16	2.14	p53	2	Sunitinib SAHA	0.50 0.50	0.1	2	Vin SAHA	0.50 0.50	0.02	0.08
362	2	0.65	0	0	0	0.35	0	0	0	2	Vin SAHA	0.50 0.50	0.04	2	CBL IRT	0.50 0.50	2.2	2.16	p53	2	Sunitinib SAHA	0.50 0.50	0.12	2	Vin SAHA	0.50 0.50	0.04	0.08
363	2	0.66	0	0	0	0.34	0	0	0	2	Vin SAHA	0.50 0.50	0.08	2	CBL IRT	0.50 0.50	2.24	2.16	p53	2	Sunitinib SAHA	0.50 0.50	0.14	2	Vin SAHA	0.50 0.50	0.08	0.06
364	2	0.67	0	0	0	0.33	0	0	0	2	Vin SAHA	0.50 0.50	0.1	2	CBL IRT	0.50 0.50	2.28	2.18	p53	2	Sunitinib SAHA	0.50 0.50	0.14	2	Vin SAHA	0.50 0.50	0.1	0.04
365	2	0.68	0	0	0	0.32	0	0	0	2	Vin SAHA	0.50 0.50	0.12	2	CBL IRT	0.50 0.50	2.32	2.2	p53	2	Sunitinib SAHA	0.50 0.50	0.16	2	Vin SAHA	0.50 0.50	0.12	0.04
366	2	0.69	0	0	0	0.31	0	0	0	2	Vin SAHA	0.50 0.50	0.14	2	CBL IRT	0.50 0.50	2.36	2.22	p53	2	Sunitinib SAHA	0.50 0.50	0.18	2	Vin SAHA	0.50 0.50	0.14	0.04
367	2	0.7	0	0	0	0.3	0	0	0	2	Vin SAHA	0.50 0.50	0.18	2	CBL IRT	0.50 0.50	2.4	2.22	p53	2	Sunitinib SAHA	0.50 0.50	0.18	2	Vin SAHA	0.50 0.50	0.18	0
368	2	0.71	0	0	0	0.29	0	0	0	2	Vin SAHA	0.50 0.50	0.2	2	CBL IRT	0.50 0.50	2.44	2.24	p53	2	Sunitinib SAHA	0.50 0.50	0.2	2	Vin SAHA	0.50 0.50	0.2	0
369	2	0.72	0	0	0	0.28	0	0	0	2	Sunitinib SAHA	0.50 0.50	0.22	2	CBL IRT	0.50 0.50	2.48	2.26	p53	2	Sunitinib SAHA	0.50 0.50	0.22	2	Sunitinib SAHA	0.50 0.50	0.22	0
370	2	0.73	0	0	0	0.27	0	0	0	2	Sunitinib SAHA	0.50 0.50	0.24	2	CBL IRT	0.50 0.50	2.52	2.28	p53	2	Sunitinib SAHA	0.50 0.50	0.24	2	Sunitinib SAHA	0.50 0.50	0.24	0
371	2	0.74	0	0	0	0.26	0	0	0	2	Sunitinib SAHA	0.50 0.50	0.24	2	CBL IRT	0.50 0.50	2.56	2.32	p53	2	Sunitinib SAHA	0.50 0.50	0.24	2	Sunitinib SAHA	0.50 0.50	0.24	0
372	2	0.75	0	0	0	0.25	0	0	0	2	Sunitinib SAHA	0.50 0.50	0.26	2	CBL IRT	0.50 0.50	2.6	2.34	p53	2	Sunitinib SAHA	0.50 0.50	0.26	2	Sunitinib SAHA	0.50 0.50	0.26	0
373	2	0.76	0	0	0	0.24	0	0	0	2	Sunitinib SAHA	0.50 0.50	0.28	2	CBL IRT	0.50 0.50	2.66	2.38	p53	2	Sunitinib SAHA	0.50 0.50	0.28	2	Sunitinib SAHA	0.50 0.50	0.28	0
374	2	0.77	0	0	0	0.23	0	0	0	2	Sunitinib SAHA	0.50 0.50	0.3	2	CBL IRT	0.50 0.50	2.7	2.4	p53	2	Sunitinib SAHA	0.50 0.50	0.3	2	Sunitinib SAHA	0.50 0.50	0.3	0
375	2	0.78	0	0	0	0.22	0	0	0	2	Sunitinib SAHA	0.50 0.50	0.3	2	CBL IRT	0.50 0.50	2.74	2.44	p53	2	Sunitinib SAHA	0.50 0.50	0.3	2	Sunitinib SAHA	0.50 0.50	0.3	0
376	2	0.79	0	0	0	0.21	0	0	0	2	Sunitinib SAHA	0.50 0.50	0.32	2	CBL IRT	0.50 0.50	2.78	2.46	p53	2	Sunitinib SAHA	0.50 0.50	0.32	2	Sunitinib SAHA	0.50 0.50	0.32	0
377	2	0.8	0	0	0	0.2	0	0	0	2	Sunitinib SAHA	0.50 0.50	0.34	2	CBL IRT	0.50 0.50	2.82	2.48	p53	2	Sunitinib SAHA	0.50 0.50	0.34	2	Sunitinib SAHA	0.50 0.50	0.34	0
378	2	0.81	0	0	0	0.19	0	0	0	2	Sunitinib SAHA	0.50 0.50	0.34	2	CBL IRT	0.50 0.50	2.86	2.52	p53	2	Sunitinib SAHA	0.50 0.50	0.34	2	Sunitinib SAHA	0.50 0.50	0.34	0
379	2	0.82	0	0	0	0.18	0	0	0	2	Sunitinib SAHA	0.50 0.50	0.36	2	CBL IRT	0.50 0.50	2.9	2.54	p53	2	Sunitinib SAHA	0.50 0.50	0.36	2	Sunitinib SAHA	0.50 0.50	0.36	0
380	2	0.83	0	0	0	0.17	0	0	0	2	Sunitinib SAHA	0.50 0.50	0.38	2	CBL IRT	0.50 0.50	2.94	2.56	p53	2	Sunitinib SAHA	0.50 0.50	0.38	2	Sunitinib SAHA	0.50 0.50	0.38	0
381	2	0.84	0	0	0	0.16	0	0	0	2	Sunitinib SAHA	0.50 0.50	0.4	2	CBL IRT	0.50 0.50	2.98	2.58	p53	2	Sunitinib SAHA	0.50 0.50	0.4	2	Sunitinib SAHA	0.50 0.50	0.4	0
382	2	0.85	0	0	0	0.15	0	0	0	2	Sunitinib SAHA	0.50 0.50	0.4	2	CBL IRT	0.50 0.50	3.02	2.62	p53	2	Sunitinib SAHA	0.50 0.50	0.4	2	Sunitinib SAHA	0.50 0.50	0.4	0
383	2	0.86	0	0	0	0.14	0	0	0	2	Sunitinib SAHA	0.50 0.50	0.42	2	CBL IRT	0.50 0.50	3.06	2.64	p53	2	Sunitinib SAHA	0.50 0.50	0.42	2	Sunitinib SAHA	0.50 0.50	0.42	0
384	2	0.87	0	0	0	0.13	0	0	0	2	Sunitinib SAHA	0.50 0.50	0.44	2	CBL IRT	0.50 0.50	3.1	2.66	p53	2	Sunitinib SAHA	0.50 0.50	0.44	2	Sunitinib SAHA	0.50 0.50	0.44	0
385	2	0.88	0	0	0	0.12	0	0	0	2	Sunitinib SAHA	0.50 0.50	0.44	2	CBL IRT	0.50 0.50	3.16	2.72	p53	2	Sunitinib SAHA	0.50 0.50	0.44	2	Sunitinib SAHA	0.50 0.50	0.44	0
386	2	0.89	0	0	0	0.11	0	0	0	2	Sunitinib SAHA	0.50 0.50	0.46	2	CBL IRT	0.50 0.50	3.2	2.74	p53	2	Sunitinib SAHA	0.50 0.50	0.46	2	Sunitinib SAHA	0.50 0.50	0.46	0
387	2	0.9	0	0	0	0.1	0	0	0	2	Sunitinib SAHA	0.50 0.50	0.48	2	CBL IRT	0.50 0.50	3.24	2.76	p53	2	Sunitinib SAHA	0.50 0.50	0.48	2	Sunitinib SAHA	0.50 0.50	0.48	0
388	2	0.91	0	0	0	0.09	0	0	0	2	Sunitinib SAHA	0.50 0.50	0.5	2	CBL IRT	0.50 0.50	3.28	2.78	p53	2	Sunitinib SAHA	0.50 0.50	0.5	2	Sunitinib SAHA	0.50 0.50	0.5	0
389	2	0.92	0	0	0	0.08	0	0	0	2	Sunitinib SAHA	0.50 0.50	0.5	2	CBL IRT	0.50 0.50	3.32	2.82	p53	2	Sunitinib SAHA	0.50 0.50	0.5	2	Sunitinib SAHA	0.50 0.50	0.5	0
390	2	0.93	0	0	0	0.07	0	0	0	2	Sunitinib SAHA	0.50 0.50	0.52	2	CBL IRT	0.50 0.50	3.36	2.84	p53	2	Sunitinib SAHA	0.50 0.50	0.52	2	Sunitinib SAHA	0.50 0.50	0.52	0
391	2	0.94	0	0	0	0.06	0	0	0	2	Sunitinib SAHA	0.50 0.50	0.54	2	CBL IRT	0.50 0.50	3.4	2.86	p53	2	Sunitinib SAHA	0.50 0.50	0.54	2	Sunitinib SAHA	0.50 0.50	0.54	0
392	2	0.95	0	0	0	0.05	0	0	0	2	Sunitinib SAHA	0.50 0.50	0.54	2	CBL IRT	0.50 0.50	3.44	2.9	p53	2	Sunitinib SAHA	0.50 0.50	0.54	2	Sunitinib SAHA	0.50 0.50	0.54	0
393	2	0.96	0	0	0	0.04	0	0	0	2	Sunitinib SAHA	0.50 0.50	0.56	2	CBL IRT	0.50 0.50	3.48	2.92	p53	2	Sunitinib SAHA	0.50 0.50	0.56	2	Sunitinib SAHA	0.50 0.50	0.56	0
394	2	0.97	0	0	0	0.03	0	0	0	2	Sunitinib SAHA	0.50 0.50	0.58	2	CBL IRT	0.50 0.50	3.52	2.94	p53	2	Sunitinib SAHA	0.50 0.50	0.58	2	Sunitinib SAHA	0.50 0.50	0.58	0
395	2	0.98	0	0	0	0.02	0	0	0	2	Sunitinib SAHA	0.50 0.50	0.6	2	CBL IRT	0.50 0.50	3.56	2.96	p53	2	Sunitinib SAHA	0.50 0.50	0.6	2	Sunitinib SAHA	0.50 0.50	0.6	0
396	2	0.99	0	0	0	0.01	0	0	0	2	Sunitinib SAHA	0.50 0.50	0.6	2	CBL IRT	0.50 0.50	3.6	3	p53	2	Sunitinib SAHA	0.50 0.50	0.6	2	Sunitinib SAHA	0.50 0.50	0.6	0
397	2	0.01	0	0	0	0	0.99	0	0	2	DOX 17AAG	0.50 0.50	-0.9	2	CBL IRT	0.50 0.50	1.04	1.94	dnapk	2	DOX 17AAG	0.50 0.50	-0.9	2	DOX 17AAG	0.50 0.50	-0.9	0
398	2	0.02	0	0	0	0	0.98	0	0	2	DOX 17AAG	0.50 0.50	-0.86	2	CBL IRT	0.50 0.50	1.08	1.94	dnapk	2	DOX 17AAG	0.50 0.50	-0.86	2	DOX 17AAG	0.50 0.50	-0.86	0
399	2	0.03	0	0	0	0	0.97	0	0	2	DOX 17AAG	0.50 0.50	-0.84	2	CBL IRT	0.50 0.50	1.1	1.94	dnapk	2	DOX 17AAG	0.50 0.50	-0.84	2	DOX 17AAG	0.50 0.50	-0.84	0
400	2	0.04	0	0	0	0	0.96	0	0	2	DOX 17AAG	0.50 0.50	-0.8	2	CBL IRT	0.50 0.50	1.12	1.92	dnapk	2	DOX 17AAG	0.50 0.50	-0.8	2	DOX 17AAG	0.50 0.50	-0.8	0
401	2	0.05	0	0	0	0	0.95	0	0	2	DOX 17AAG	0.50 0.50	-0.78	2	CBL IRT	0.50 0.50	1.16	1.94	dnapk	2	DOX 17AAG	0.50 0.50	-0.78	2	DOX 17AAG	0.50 0.50	-0.78	0
402	2	0.06	0	0	0	0	0.94	0	0	2	DOX 17AAG	0.50 0.50	-0.74	2	CBL IRT	0.50 0.50	1.18	1.92	dnapk	2	DOX 17AAG	0.50 0.50	-0.74	2	DOX 17AAG	0.50 0.50	-0.74	0
403	2	0.07	0	0	0	0	0.93	0	0	2	DOX 17AAG	0.50 0.50	-0.7	2	CBL IRT	0.50 0.50	1.2	1.9	dnapk	2	DOX 17AAG	0.50 0.50	-0.7	2	DOX 17AAG	0.50 0.50	-0.7	0
404	2	0.08	0	0	0	0	0.92	0	0	2	DOX 17AAG	0.50 0.50	-0.68	2	CBL IRT	0.50 0.50	1.24	1.92	dnapk	2	DOX 17AAG	0.50 0.50	-0.68	2	DOX 17AAG	0.50 0.50	-0.68	0
405	2	0.09	0	0	0	0	0.91	0	0	2	DOX 17AAG	0.50 0.50	-0.64	2	CBL IRT	0.50 0.50	1.26	1.9	dnapk	2	DOX 17AAG	0.50 0.50	-0.64	2	DOX 17AAG	0.50 0.50	-0.64	0
406	2	0.1	0	0	0	0	0.9	0	0	2	DOX 17AAG	0.50 0.50	-0.62	2	CBL IRT	0.50 0.50	1.28	1.9	dnapk	2	DOX 17AAG	0.50 0.50	-0.62	2	DOX 17AAG	0.50 0.50	-0.62	0
407	2	0.11	0	0	0	0	0.89	0	0	2	DOX 17AAG	0.50 0.50	-0.58	2	CBL IRT	0.50 0.50	1.3	1.88	dnapk	2	DOX 17AAG	0.50 0.50	-0.58	2	DOX 17AAG	0.50 0.50	-0.58	0
408	2	0.12	0	0	0	0	0.88	0	0	2	DOX 17AAG	0.50 0.50	-0.56	2	CBL IRT	0.50 0.50	1.34	1.9	dnapk	2	DOX 17AAG	0.50 0.50	-0.56	2	DOX 17AAG	0.50 0.50	-0.56	0
409	2	0.13	0	0	0	0	0.87	0	0	2	DOX 17AAG	0.50 0.50	-0.52	2	CBL IRT	0.50 0.50	1.36	1.88	dnapk	2	DOX 17AAG	0.50 0.50	-0.52	2	DOX 17AAG	0.50 0.50	-0.52	0
410	2	0.14	0	0	0	0	0.86	0	0	2	DOX 17AAG	0.50 0.50	-0.48	2	CBL IRT	0.50 0.50	1.38	1.86	dnapk	2	DOX 17AAG	0.50 0.50	-0.48	2	DOX 17AAG	0.50 0.50	-0.48	0
411	2	0.15	0	0	0	0	0.85	0	0	2	DOX 17AAG	0.50 0.50	-0.46	2	CBL IRT	0.50 0.50	1.42	1.88	dnapk	2	DOX 17AAG	0.50 0.50	-0.46	2	DOX 17AAG	0.50 0.50	-0.46	0
412	2	0.16	0	0	0	0	0.84	0	0	2	DOX 17AAG	0.50 0.50	-0.42	2	CBL IRT	0.50 0.50	1.44	1.86	dnapk	2	DOX 17AAG	0.50 0.50	-0.42	2	DOX 17AAG	0.50 0.50	-0.42	0
413	2	0.17	0	0	0	0	0.83	0	0	2	DOX 17AAG	0.50 0.50	-0.4	2	CBL IRT	0.50 0.50	1.46	1.86	dnapk	2	DOX 17AAG	0.50 0.50	-0.4	2	DOX 17AAG	0.50 0.50	-0.4	0
414	2	0.18	0	0	0	0	0.82	0	0	2	DOX 17AAG	0.50 0.50	-0.36	2	CBL IRT	0.50 0.50	1.5	1.86	dnapk	2	DOX 17AAG	0.50 0.50	-0.36	2	DOX 17AAG	0.50 0.50	-0.36	0
415	2	0.19	0	0	0	0	0.81	0	0	2	DOX 17AAG	0.50 0.50	-0.34	2	CBL IRT	0.50 0.50	1.52	1.86	dnapk	2	DOX 17AAG	0.50 0.50	-0.34	2	DOX 17AAG	0.50 0.50	-0.34	0
416	2	0.2	0	0	0	0	0.8	0	0	2	DOX 17AAG	0.50 0.50	-0.3	2	CBL IRT	0.50 0.50	1.54	1.84	dnapk	2	DOX 17AAG	0.50 0.50	-0.3	2	DOX 17AAG	0.50 0.50	-0.3	0
417	2	0.21	0	0	0	0	0.79	0	0	2	DOX 17AAG	0.50 0.50	-0.26	2	CBL IRT	0.50 0.50	1.58	1.84	dnapk	2	DOX 17AAG	0.50 0.50	-0.26	2	DOX 17AAG	0.50 0.50	-0.26	0
418	2	0.22	0	0	0	0	0.78	0	0	2	DOX 17AAG	0.50 0.50	-0.24	2	CBL IRT	0.50 0.50	1.6	1.84	dnapk	2	DOX 17AAG	0.50 0.50	-0.24	2	DOX 17AAG	0.50 0.50	-0.24	0
419	2	0.23	0	0	0	0	0.77	0	0	2	DOX 17AAG	0.50 0.50	-0.2	2	CBL IRT	0.50 0.50	1.62	1.82	dnapk	2	DOX 17AAG	0.50 0.50	-0.2	2	DOX 17AAG	0.50 0.50	-0.2	0
420	2	0.24	0	0	0	0	0.76	0	0	2	DOX 17AAG	0.50 0.50	-0.18	2	CBL IRT	0.50 0.50	1.66	1.84	dnapk	2	DOX 17AAG	0.50 0.50	-0.18	2	DOX 17AAG	0.50 0.50	-0.18	0
421	2	0.25	0	0	0	0	0.75	0	0	2	DOX 17AAG	0.50 0.50	-0.14	2	CBL IRT	0.50 0.50	1.68	1.82	dnapk	2	DOX 17AAG	0.50 0.50	-0.14	2	DOX 17AAG	0.50 0.50	-0.14	0
422	2	0.26	0	0	0	0	0.74	0	0	2	DOX 17AAG	0.50 0.50	-0.12	2	CBL IRT	0.50 0.50	1.7	1.82	dnapk	2	DOX 17AAG	0.50 0.50	-0.12	2	DOX 17AAG	0.50 0.50	-0.12	0
423	2	0.27	0	0	0	0	0.73	0	0	2	DOX 17AAG	0.50 0.50	-0.08	2	CBL IRT	0.50 0.50	1.74	1.82	dnapk	2	DOX 17AAG	0.50 0.50	-0.08	2	DOX 17AAG	0.50 0.50	-0.08	0
424	2	0.28	0	0	0	0	0.72	0	0	2	DOX 17AAG	0.50 0.50	-0.04	2	CBL IRT	0.50 0.50	1.76	1.8	dnapk	2	DOX 17AAG	0.50 0.50	-0.04	2	DOX 17AAG	0.50 0.50	-0.04	0
425	2	0.29	0	0	0	0	0.71	0	0	2	DOX 17AAG	0.50 0.50	-0.02	2	CBL IRT	0.50 0.50	1.78	1.8	dnapk	2	DOX 17AAG	0.50 0.50	-0.02	2	DOX 17AAG	0.50 0.50	-0.02	0
426	2	0.3	0	0	0	0	0.7	0	0	2	DOX 17AAG	0.50 0.50	0.02	2	CBL IRT	0.50 0.50	1.8	1.78	dnapk	2	DOX 17AAG	0.50 0.50	0.02	2	DOX 17AAG	0.50 0.50	0.02	0
427	2	0.31	0	0	0	0	0.69	0	0	2	DOX 17AAG	0.50 0.50	0.04	2	CBL IRT	0.50 0.50	1.84	1.8	dnapk	2	DOX 17AAG	0.50 0.50	0.04	2	DOX 17AAG	0.50 0.50	0.04	0
428	2	0.32	0	0	0	0	0.68	0	0	2	DOX 17AAG	0.50 0.50	0.08	2	CBL IRT	0.50 0.50	1.86	1.78	dnapk	2	DOX 17AAG	0.50 0.50	0.08	2	DOX 17AAG	0.50 0.50	0.08	0
429	2	0.33	0	0	0	0	0.67	0	0	2	DOX 17AAG	0.50 0.50	0.1	2	CBL IRT	0.50 0.50	1.88	1.78	dnapk	2	DOX 17AAG	0.50 0.50	0.1	2	DOX 17AAG	0.50 0.50	0.1	0
430	2	0.34	0	0	0	0	0.66	0	0	2	Sunitinib 17AAG	0.50 0.50	0.14	2	CBL IRT	0.50 0.50	1.92	1.78	dnapk	2	DOX 17AAG	0.50 0.50	0.14	2	Sunitinib 17AAG	0.50 0.50	0.14	0
431	2	0.35	0	0	0	0	0.65	0	0	2	Sunitinib 17AAG	0.50 0.50	0.14	2	CBL IRT	0.50 0.50	1.94	1.8	dnapk	2	DOX 17AAG	0.50 0.50	0.18	2	Sunitinib 17AAG	0.50 0.50	0.14	0.04
432	2	0.36	0	0	0	0	0.64	0	0	2	Sunitinib 17AAG	0.50 0.50	0.16	2	CBL IRT	0.50 0.50	1.96	1.8	dnapk	2	DOX 17AAG	0.50 0.50	0.2	2	Sunitinib 17AAG	0.50 0.50	0.16	0.04
433	2	0.37	0	0	0	0	0.63	0	0	2	Sunitinib 17AAG	0.50 0.50	0.16	2	CBL IRT	0.50 0.50	2	1.84	dnapk	2	DOX 17AAG	0.50 0.50	0.24	2	Sunitinib 17AAG	0.50 0.50	0.16	0.08
434	2	0.38	0	0	0	0	0.62	0	0	2	Sunitinib 17AAG	0.50 0.50	0.18	2	CBL IRT	0.50 0.50	2.02	1.84	dnapk	2	DOX 17AAG	0.50 0.50	0.26	2	Sunitinib 17AAG	0.50 0.50	0.18	0.08
435	2	0.39	0	0	0	0	0.61	0	0	2	Sunitinib 17AAG	0.50 0.50	0.2	2	CBL IRT	0.50 0.50	2.04	1.84	dnapk	2	DOX 17AAG	0.50 0.50	0.3	2	Sunitinib 17AAG	0.50 0.50	0.2	0.1
436	2	0.4	0	0	0	0	0.6	0	0	2	Sunitinib 17AAG	0.50 0.50	0.2	2	CBL IRT	0.50 0.50	2.08	1.88	dnapk	2	DOX 17AAG	0.50 0.50	0.32	2	Sunitinib 17AAG	0.50 0.50	0.2	0.12
437	2	0.41	0	0	0	0	0.59	0	0	2	Sunitinib 17AAG	0.50 0.50	0.22	2	CBL IRT	0.50 0.50	2.1	1.88	dnapk	2	DOX 17AAG	0.50 0.50	0.36	2	Sunitinib 17AAG	0.50 0.50	0.22	0.14
438	2	0.42	0	0	0	0	0.58	0	0	2	Sunitinib 17AAG	0.50 0.50	0.22	2	CBL IRT	0.50 0.50	2.12	1.9	dnapk	2	DOX 17AAG	0.50 0.50	0.4	2	Sunitinib 17AAG	0.50 0.50	0.22	0.18
439	2	0.43	0	0	0	0	0.57	0	0	2	Sunitinib 17AAG	0.50 0.50	0.24	2	CBL IRT	0.50 0.50	2.16	1.92	dnapk	2	DOX 17AAG	0.50 0.50	0.42	2	Sunitinib 17AAG	0.50 0.50	0.24	0.18
440	2	0.44	0	0	0	0	0.56	0	0	2	Sunitinib 17AAG	0.50 0.50	0.24	2	CBL IRT	0.50 0.50	2.18	1.94	dnapk	2	DOX 17AAG	0.50 0.50	0.46	2	Sunitinib 17AAG	0.50 0.50	0.24	0.22
441	2	0.45	0	0	0	0	0.55	0	0	2	Sunitinib 17AAG	0.50 0.50	0.26	2	CBL IRT	0.50 0.50	2.2	1.94	dnapk	2	DOX 17AAG	0.50 0.50	0.48	2	Sunitinib 17AAG	0.50 0.50	0.26	0.22
442	2	0.46	0	0	0	0	0.54	0	0	2	Sunitinib 17AAG	0.50 0.50	0.28	2	CBL IRT	0.50 0.50	2.22	1.94	dnapk	2	DOX 17AAG	0.50 0.50	0.52	2	Sunitinib 17AAG	0.50 0.50	0.28	0.24
443	2	0.47	0	0	0	0	0.53	0	0	2	Sunitinib 17AAG	0.50 0.50	0.28	2	CBL IRT	0.50 0.50	2.26	1.98	dnapk	2	DOX 17AAG	0.50 0.50	0.54	2	Sunitinib 17AAG	0.50 0.50	0.28	0.26
444	2	0.48	0	0	0	0	0.52	0	0	2	Sunitinib 17AAG	0.50 0.50	0.3	2	CBL IRT	0.50 0.50	2.28	1.98	dnapk	2	DOX 17AAG	0.50 0.50	0.58	2	Sunitinib 17AAG	0.50 0.50	0.3	0.28
445	2	0.49	0	0	0	0	0.51	0	0	2	Sunitinib 17AAG	0.50 0.50	0.3	2	CBL IRT	0.50 0.50	2.3	2	dnapk	2	DOX 17AAG	0.50 0.50	0.62	2	Sunitinib 17AAG	0.50 0.50	0.3	0.32
446	2	0.5	0	0	0	0	0.5	0	0	2	Sunitinib 17AAG	0.50 0.50	0.32	2	CBL IRT	0.50 0.50	2.34	2.02	dnapk	2	DOX 17AAG	0.50 0.50	0.64	2	Sunitinib 17AAG	0.50 0.50	0.32	0.32
447	2	0.51	0	0	0	0	0.49	0	0	2	Sunitinib 17AAG	0.50 0.50	0.32	2	CBL IRT	0.50 0.50	2.36	2.04	p53	2	Sunitinib SAHA	0.50 0.50	0.46	2	Sunitinib 17AAG	0.50 0.50	0.32	0.14
448	2	0.52	0	0	0	0	0.48	0	0	2	Sunitinib 17AAG	0.50 0.50	0.34	2	CBL IRT	0.50 0.50	2.38	2.04	p53	2	Sunitinib SAHA	0.50 0.50	0.48	2	Sunitinib 17AAG	0.50 0.50	0.34	0.14
449	2	0.53	0	0	0	0	0.47	0	0	2	Sunitinib 17AAG	0.50 0.50	0.34	2	CBL IRT	0.50 0.50	2.42	2.08	p53	2	Sunitinib SAHA	0.50 0.50	0.48	2	Sunitinib 17AAG	0.50 0.50	0.34	0.14
450	2	0.54	0	0	0	0	0.46	0	0	2	Sunitinib 17AAG	0.50 0.50	0.36	2	CBL IRT	0.50 0.50	2.44	2.08	p53	2	Sunitinib SAHA	0.50 0.50	0.48	2	Sunitinib 17AAG	0.50 0.50	0.36	0.12
451	2	0.55	0	0	0	0	0.45	0	0	2	Sunitinib 17AAG	0.50 0.50	0.38	2	CBL IRT	0.50 0.50	2.46	2.08	p53	2	Sunitinib SAHA	0.50 0.50	0.48	2	Sunitinib 17AAG	0.50 0.50	0.38	0.1
452	2	0.56	0	0	0	0	0.44	0	0	2	Sunitinib 17AAG	0.50 0.50	0.38	2	CBL IRT	0.50 0.50	2.5	2.12	p53	2	Sunitinib SAHA	0.50 0.50	0.48	2	Sunitinib 17AAG	0.50 0.50	0.38	0.1
453	2	0.57	0	0	0	0	0.43	0	0	2	Sunitinib 17AAG	0.50 0.50	0.4	2	CBL IRT	0.50 0.50	2.52	2.12	p53	2	Sunitinib SAHA	0.50 0.50	0.48	2	Sunitinib 17AAG	0.50 0.50	0.4	0.08
454	2	0.58	0	0	0	0	0.42	0	0	2	Sunitinib 17AAG	0.50 0.50	0.4	2	CBL IRT	0.50 0.50	2.54	2.14	p53	2	Sunitinib SAHA	0.50 0.50	0.5	2	Sunitinib 17AAG	0.50 0.50	0.4	0.1
455	2	0.59	0	0	0	0	0.41	0	0	2	Sunitinib 17AAG	0.50 0.50	0.42	2	CBL IRT	0.50 0.50	2.58	2.16	p53	2	Sunitinib SAHA	0.50 0.50	0.5	2	Sunitinib 17AAG	0.50 0.50	0.42	0.08
456	2	0.6	0	0	0	0	0.4	0	0	2	Sunitinib 17AAG	0.50 0.50	0.42	2	CBL IRT	0.50 0.50	2.6	2.18	p53	2	Sunitinib SAHA	0.50 0.50	0.5	2	Sunitinib 17AAG	0.50 0.50	0.42	0.08
457	2	0.61	0	0	0	0	0.39	0	0	2	Sunitinib 17AAG	0.50 0.50	0.44	2	CBL IRT	0.50 0.50	2.62	2.18	p53	2	Sunitinib SAHA	0.50 0.50	0.5	2	Sunitinib 17AAG	0.50 0.50	0.44	0.06
458	2	0.62	0	0	0	0	0.38	0	0	2	Sunitinib 17AAG	0.50 0.50	0.46	2	CBL IRT	0.50 0.50	2.66	2.2	p53	2	Sunitinib SAHA	0.50 0.50	0.5	2	Sunitinib 17AAG	0.50 0.50	0.46	0.04
459	2	0.63	0	0	0	0	0.37	0	0	2	Sunitinib 17AAG	0.50 0.50	0.46	2	CBL IRT	0.50 0.50	2.68	2.22	p53	2	Sunitinib SAHA	0.50 0.50	0.5	2	Sunitinib 17AAG	0.50 0.50	0.46	0.04
460	2	0.64	0	0	0	0	0.36	0	0	2	Sunitinib 17AAG	0.50 0.50	0.48	2	CBL IRT	0.50 0.50	2.7	2.22	p53	2	Sunitinib SAHA	0.50 0.50	0.5	2	Sunitinib 17AAG	0.50 0.50	0.48	0.02
461	2	0.65	0	0	0	0	0.35	0	0	2	Sunitinib 17AAG	0.50 0.50	0.48	2	CBL IRT	0.50 0.50	2.72	2.24	p53	2	Sunitinib SAHA	0.50 0.50	0.52	2	Sunitinib 17AAG	0.50 0.50	0.48	0.04
462	2	0.66	0	0	0	0	0.34	0	0	2	Sunitinib 17AAG	0.50 0.50	0.5	2	CBL IRT	0.50 0.50	2.76	2.26	p53	2	Sunitinib SAHA	0.50 0.50	0.52	2	Sunitinib 17AAG	0.50 0.50	0.5	0.02
463	2	0.67	0	0	0	0	0.33	0	0	2	Sunitinib 17AAG	0.50 0.50	0.5	2	CBL IRT	0.50 0.50	2.78	2.28	p53	2	Sunitinib SAHA	0.50 0.50	0.52	2	Sunitinib 17AAG	0.50 0.50	0.5	0.02
464	2	0.68	0	0	0	0	0.32	0	0	2	Sunitinib 17AAG	0.50 0.50	0.52	2	CBL IRT	0.50 0.50	2.8	2.28	p53	2	Sunitinib SAHA	0.50 0.50	0.52	2	Sunitinib 17AAG	0.50 0.50	0.52	0
465	2	0.69	0	0	0	0	0.31	0	0	2	Sunitinib SAHA	0.50 0.50	0.52	2	CBL IRT	0.50 0.50	2.84	2.32	p53	2	Sunitinib SAHA	0.50 0.50	0.52	2	Sunitinib SAHA	0.50 0.50	0.52	0
466	2	0.7	0	0	0	0	0.3	0	0	2	Sunitinib SAHA	0.50 0.50	0.52	2	CBL IRT	0.50 0.50	2.86	2.34	p53	2	Sunitinib SAHA	0.50 0.50	0.52	2	Sunitinib SAHA	0.50 0.50	0.52	0
467	2	0.71	0	0	0	0	0.29	0	0	2	Sunitinib SAHA	0.50 0.50	0.54	2	CBL IRT	0.50 0.50	2.88	2.34	p53	2	Sunitinib SAHA	0.50 0.50	0.54	2	Sunitinib SAHA	0.50 0.50	0.54	0
468	2	0.72	0	0	0	0	0.28	0	0	2	Sunitinib SAHA	0.50 0.50	0.54	2	CBL IRT	0.50 0.50	2.92	2.38	p53	2	Sunitinib SAHA	0.50 0.50	0.54	2	Sunitinib SAHA	0.50 0.50	0.54	0
469	2	0.73	0	0	0	0	0.27	0	0	2	Sunitinib SAHA	0.50 0.50	0.54	2	CBL IRT	0.50 0.50	2.94	2.4	p53	2	Sunitinib SAHA	0.50 0.50	0.54	2	Sunitinib SAHA	0.50 0.50	0.54	0
470	2	0.74	0	0	0	0	0.26	0	0	2	Sunitinib SAHA	0.50 0.50	0.54	2	CBL IRT	0.50 0.50	2.96	2.42	p53	2	Sunitinib SAHA	0.50 0.50	0.54	2	Sunitinib SAHA	0.50 0.50	0.54	0
471	2	0.75	0	0	0	0	0.25	0	0	2	Sunitinib SAHA	0.50 0.50	0.54	2	CBL IRT	0.50 0.50	3	2.46	p53	2	Sunitinib SAHA	0.50 0.50	0.54	2	Sunitinib SAHA	0.50 0.50	0.54	0
472	2	0.76	0	0	0	0	0.24	0	0	2	Sunitinib SAHA	0.50 0.50	0.54	2	CBL IRT	0.50 0.50	3.02	2.48	p53	2	Sunitinib SAHA	0.50 0.50	0.54	2	Sunitinib SAHA	0.50 0.50	0.54	0
473	2	0.77	0	0	0	0	0.23	0	0	2	Sunitinib SAHA	0.50 0.50	0.56	2	CBL IRT	0.50 0.50	3.04	2.48	p53	2	Sunitinib SAHA	0.50 0.50	0.56	2	Sunitinib SAHA	0.50 0.50	0.56	0
474	2	0.78	0	0	0	0	0.22	0	0	2	Sunitinib SAHA	0.50 0.50	0.56	2	CBL IRT	0.50 0.50	3.08	2.52	p53	2	Sunitinib SAHA	0.50 0.50	0.56	2	Sunitinib SAHA	0.50 0.50	0.56	0
475	2	0.79	0	0	0	0	0.21	0	0	2	Sunitinib SAHA	0.50 0.50	0.56	2	CBL IRT	0.50 0.50	3.1	2.54	p53	2	Sunitinib SAHA	0.50 0.50	0.56	2	Sunitinib SAHA	0.50 0.50	0.56	0
476	2	0.8	0	0	0	0	0.2	0	0	2	Sunitinib SAHA	0.50 0.50	0.56	2	CBL IRT	0.50 0.50	3.12	2.56	p53	2	Sunitinib SAHA	0.50 0.50	0.56	2	Sunitinib SAHA	0.50 0.50	0.56	0
477	2	0.81	0	0	0	0	0.19	0	0	2	Sunitinib SAHA	0.50 0.50	0.56	2	CBL IRT	0.50 0.50	3.14	2.58	p53	2	Sunitinib SAHA	0.50 0.50	0.56	2	Sunitinib SAHA	0.50 0.50	0.56	0
478	2	0.82	0	0	0	0	0.18	0	0	2	Sunitinib SAHA	0.50 0.50	0.56	2	CBL IRT	0.50 0.50	3.18	2.62	p53	2	Sunitinib SAHA	0.50 0.50	0.56	2	Sunitinib SAHA	0.50 0.50	0.56	0
479	2	0.83	0	0	0	0	0.17	0	0	2	Sunitinib SAHA	0.50 0.50	0.56	2	CBL IRT	0.50 0.50	3.2	2.64	p53	2	Sunitinib SAHA	0.50 0.50	0.56	2	Sunitinib SAHA	0.50 0.50	0.56	0
480	2	0.84	0	0	0	0	0.16	0	0	2	Sunitinib SAHA	0.50 0.50	0.58	2	CBL IRT	0.50 0.50	3.22	2.64	p53	2	Sunitinib SAHA	0.50 0.50	0.58	2	Sunitinib SAHA	0.50 0.50	0.58	0
481	2	0.85	0	0	0	0	0.15	0	0	2	Sunitinib SAHA	0.50 0.50	0.58	2	CBL IRT	0.50 0.50	3.26	2.68	p53	2	Sunitinib SAHA	0.50 0.50	0.58	2	Sunitinib SAHA	0.50 0.50	0.58	0
482	2	0.86	0	0	0	0	0.14	0	0	2	Sunitinib SAHA	0.50 0.50	0.58	2	CBL IRT	0.50 0.50	3.28	2.7	p53	2	Sunitinib SAHA	0.50 0.50	0.58	2	Sunitinib SAHA	0.50 0.50	0.58	0
483	2	0.87	0	0	0	0	0.13	0	0	2	Sunitinib SAHA	0.50 0.50	0.58	2	CBL IRT	0.50 0.50	3.3	2.72	p53	2	Sunitinib SAHA	0.50 0.50	0.58	2	Sunitinib SAHA	0.50 0.50	0.58	0
484	2	0.88	0	0	0	0	0.12	0	0	2	Sunitinib SAHA	0.50 0.50	0.58	2	CBL IRT	0.50 0.50	3.34	2.76	p53	2	Sunitinib SAHA	0.50 0.50	0.58	2	Sunitinib SAHA	0.50 0.50	0.58	0
485	2	0.89	0	0	0	0	0.11	0	0	2	Sunitinib SAHA	0.50 0.50	0.58	2	CBL IRT	0.50 0.50	3.36	2.78	p53	2	Sunitinib SAHA	0.50 0.50	0.58	2	Sunitinib SAHA	0.50 0.50	0.58	0
486	2	0.9	0	0	0	0	0.1	0	0	2	Sunitinib SAHA	0.50 0.50	0.6	2	CBL IRT	0.50 0.50	3.38	2.78	p53	2	Sunitinib SAHA	0.50 0.50	0.6	2	Sunitinib SAHA	0.50 0.50	0.6	0
487	2	0.91	0	0	0	0	0.09	0	0	2	Sunitinib SAHA	0.50 0.50	0.6	2	CBL IRT	0.50 0.50	3.42	2.82	p53	2	Sunitinib SAHA	0.50 0.50	0.6	2	Sunitinib SAHA	0.50 0.50	0.6	0
488	2	0.92	0	0	0	0	0.08	0	0	2	Sunitinib SAHA	0.50 0.50	0.6	2	CBL IRT	0.50 0.50	3.44	2.84	p53	2	Sunitinib SAHA	0.50 0.50	0.6	2	Sunitinib SAHA	0.50 0.50	0.6	0
489	2	0.93	0	0	0	0	0.07	0	0	2	Sunitinib SAHA	0.50 0.50	0.6	2	CBL IRT	0.50 0.50	3.46	2.86	p53	2	Sunitinib SAHA	0.50 0.50	0.6	2	Sunitinib SAHA	0.50 0.50	0.6	0
490	2	0.94	0	0	0	0	0.06	0	0	2	Sunitinib SAHA	0.50 0.50	0.6	2	CBL IRT	0.50 0.50	3.5	2.9	p53	2	Sunitinib SAHA	0.50 0.50	0.6	2	Sunitinib SAHA	0.50 0.50	0.6	0
491	2	0.95	0	0	0	0	0.05	0	0	2	Sunitinib SAHA	0.50 0.50	0.6	2	CBL IRT	0.50 0.50	3.52	2.92	p53	2	Sunitinib SAHA	0.50 0.50	0.6	2	Sunitinib SAHA	0.50 0.50	0.6	0
492	2	0.96	0	0	0	0	0.04	0	0	2	Sunitinib SAHA	0.50 0.50	0.6	2	CBL IRT	0.50 0.50	3.54	2.94	p53	2	Sunitinib SAHA	0.50 0.50	0.6	2	Sunitinib SAHA	0.50 0.50	0.6	0
493	2	0.97	0	0	0	0	0.03	0	0	2	Sunitinib SAHA	0.50 0.50	0.62	2	CBL IRT	0.50 0.50	3.58	2.96	p53	2	Sunitinib SAHA	0.50 0.50	0.62	2	Sunitinib SAHA	0.50 0.50	0.62	0
494	2	0.98	0	0	0	0	0.02	0	0	2	Sunitinib SAHA	0.50 0.50	0.62	2	CBL IRT	0.50 0.50	3.6	2.98	p53	2	Sunitinib SAHA	0.50 0.50	0.62	2	Sunitinib SAHA	0.50 0.50	0.62	0
495	2	0.99	0	0	0	0	0.01	0	0	2	Sunitinib SAHA	0.50 0.50	0.62	2	CBL IRT	0.50 0.50	3.62	3	p53	2	Sunitinib SAHA	0.50 0.50	0.62	2	Sunitinib SAHA	0.50 0.50	0.62	0
496	2	0.01	0	0	0	0	0	0.99	0	2	CBL Vin	0.50 0.50	-1.42	2	5FU Erlotinib	0.50 0.50	1.48	2.9	bok	2	CBL Vin	0.50 0.50	-1.42	2	CBL Vin	0.50 0.50	-1.42	0
497	2	0.02	0	0	0	0	0	0.98	0	2	CBL Vin	0.50 0.50	-1.38	2	5FU Erlotinib	0.50 0.50	1.48	2.86	bok	2	CBL Vin	0.50 0.50	-1.38	2	CBL Vin	0.50 0.50	-1.38	0
498	2	0.03	0	0	0	0	0	0.97	0	2	Vin SAHA	0.50 0.50	-1.34	2	5FU Erlotinib	0.50 0.50	1.5	2.84	bok	2	CBL Vin	0.50 0.50	-1.34	2	Vin SAHA	0.50 0.50	-1.34	0
499	2	0.04	0	0	0	0	0	0.96	0	2	Vin SAHA	0.50 0.50	-1.32	2	5FU Erlotinib	0.50 0.50	1.5	2.82	bok	2	CBL Vin	0.50 0.50	-1.3	2	Vin SAHA	0.50 0.50	-1.32	0.02
500	2	0.05	0	0	0	0	0	0.95	0	2	Vin SAHA	0.50 0.50	-1.3	2	5FU Erlotinib	0.50 0.50	1.52	2.82	bok	2	CBL Vin	0.50 0.50	-1.26	2	Vin SAHA	0.50 0.50	-1.3	0.04
501	2	0.06	0	0	0	0	0	0.94	0	2	Vin SAHA	0.50 0.50	-1.28	2	5FU Erlotinib	0.50 0.50	1.52	2.8	bok	2	CBL Vin	0.50 0.50	-1.22	2	Vin SAHA	0.50 0.50	-1.28	0.06
502	2	0.07	0	0	0	0	0	0.93	0	2	Vin SAHA	0.50 0.50	-1.26	2	5FU Erlotinib	0.50 0.50	1.54	2.8	bok	2	CBL Vin	0.50 0.50	-1.18	2	Vin SAHA	0.50 0.50	-1.26	0.08
503	2	0.08	0	0	0	0	0	0.92	0	2	Vin SAHA	0.50 0.50	-1.22	2	5FU Erlotinib	0.50 0.50	1.54	2.76	bok	2	CBL Vin	0.50 0.50	-1.14	2	Vin SAHA	0.50 0.50	-1.22	0.08
504	2	0.09	0	0	0	0	0	0.91	0	2	Vin SAHA	0.50 0.50	-1.2	2	5FU Erlotinib	0.50 0.50	1.54	2.74	bok	2	CBL Vin	0.50 0.50	-1.1	2	Vin SAHA	0.50 0.50	-1.2	0.1
505	2	0.1	0	0	0	0	0	0.9	0	2	Vin SAHA	0.50 0.50	-1.18	2	5FU Erlotinib	0.50 0.50	1.56	2.74	bok	2	CBL Vin	0.50 0.50	-1.06	2	Vin SAHA	0.50 0.50	-1.18	0.12
506	2	0.11	0	0	0	0	0	0.89	0	2	Vin SAHA	0.50 0.50	-1.16	2	5FU Erlotinib	0.50 0.50	1.56	2.72	bok	2	CBL Vin	0.50 0.50	-1.04	2	Vin SAHA	0.50 0.50	-1.16	0.12
507	2	0.12	0	0	0	0	0	0.88	0	2	Vin SAHA	0.50 0.50	-1.14	2	5FU Erlotinib	0.50 0.50	1.58	2.72	bok	2	CBL Vin	0.50 0.50	-1	2	Vin SAHA	0.50 0.50	-1.14	0.14
508	2	0.13	0	0	0	0	0	0.87	0	2	Vin SAHA	0.50 0.50	-1.12	2	5FU Erlotinib	0.50 0.50	1.58	2.7	bok	2	CBL Vin	0.50 0.50	-0.96	2	Vin SAHA	0.50 0.50	-1.12	0.16
509	2	0.14	0	0	0	0	0	0.86	0	2	Vin SAHA	0.50 0.50	-1.08	2	5FU Erlotinib	0.50 0.50	1.6	2.68	bok	2	CBL Vin	0.50 0.50	-0.92	2	Vin SAHA	0.50 0.50	-1.08	0.16
510	2	0.15	0	0	0	0	0	0.85	0	2	Vin SAHA	0.50 0.50	-1.06	2	5FU Erlotinib	0.50 0.50	1.6	2.66	bok	2	CBL Vin	0.50 0.50	-0.88	2	Vin SAHA	0.50 0.50	-1.06	0.18
511	2	0.16	0	0	0	0	0	0.84	0	2	Vin SAHA	0.50 0.50	-1.04	2	5FU Erlotinib	0.50 0.50	1.62	2.66	bok	2	CBL Vin	0.50 0.50	-0.84	2	Vin SAHA	0.50 0.50	-1.04	0.2
512	2	0.17	0	0	0	0	0	0.83	0	2	Vin SAHA	0.50 0.50	-1.02	2	5FU Erlotinib	0.50 0.50	1.62	2.64	bok	2	CBL Vin	0.50 0.50	-0.8	2	Vin SAHA	0.50 0.50	-1.02	0.22
513	2	0.18	0	0	0	0	0	0.82	0	2	Vin SAHA	0.50 0.50	-1	2	5FU Erlotinib	0.50 0.50	1.64	2.64	bok	2	CBL Vin	0.50 0.50	-0.76	2	Vin SAHA	0.50 0.50	-1	0.24
514	2	0.19	0	0	0	0	0	0.81	0	2	Vin SAHA	0.50 0.50	-0.98	2	5FU Erlotinib	0.50 0.50	1.64	2.62	bok	2	CBL Vin	0.50 0.50	-0.72	2	Vin SAHA	0.50 0.50	-0.98	0.26
515	2	0.2	0	0	0	0	0	0.8	0	2	Vin SAHA	0.50 0.50	-0.96	2	5FU Erlotinib	0.50 0.50	1.64	2.6	bok	2	CBL Vin	0.50 0.50	-0.68	2	Vin SAHA	0.50 0.50	-0.96	0.28
516	2	0.21	0	0	0	0	0	0.79	0	2	Vin SAHA	0.50 0.50	-0.92	2	5FU Erlotinib	0.50 0.50	1.66	2.58	bok	2	CBL Vin	0.50 0.50	-0.64	2	Vin SAHA	0.50 0.50	-0.92	0.28
517	2	0.22	0	0	0	0	0	0.78	0	2	Vin SAHA	0.50 0.50	-0.9	2	5FU Erlotinib	0.50 0.50	1.66	2.56	bok	2	CBL Vin	0.50 0.50	-0.6	2	Vin SAHA	0.50 0.50	-0.9	0.3
518	2	0.23	0	0	0	0	0	0.77	0	2	Vin SAHA	0.50 0.50	-0.88	2	5FU Erlotinib	0.50 0.50	1.68	2.56	bok	2	CBL Vin	0.50 0.50	-0.56	2	Vin SAHA	0.50 0.50	-0.88	0.32
519	2	0.24	0	0	0	0	0	0.76	0	2	Vin SAHA	0.50 0.50	-0.86	2	5FU Erlotinib	0.50 0.50	1.68	2.54	bok	2	CBL Vin	0.50 0.50	-0.52	2	Vin SAHA	0.50 0.50	-0.86	0.34
520	2	0.25	0	0	0	0	0	0.75	0	2	Vin SAHA	0.50 0.50	-0.84	2	5FU Erlotinib	0.50 0.50	1.7	2.54	bok	2	CBL Vin	0.50 0.50	-0.48	2	Vin SAHA	0.50 0.50	-0.84	0.36
521	2	0.26	0	0	0	0	0	0.74	0	2	Vin SAHA	0.50 0.50	-0.82	2	5FU Erlotinib	0.50 0.50	1.7	2.52	bok	2	CBL Vin	0.50 0.50	-0.44	2	Vin SAHA	0.50 0.50	-0.82	0.38
522	2	0.27	0	0	0	0	0	0.73	0	2	Vin SAHA	0.50 0.50	-0.78	2	5FU Erlotinib	0.50 0.50	1.72	2.5	bok	2	CBL Vin	0.50 0.50	-0.42	2	Vin SAHA	0.50 0.50	-0.78	0.36
523	2	0.28	0	0	0	0	0	0.72	0	2	Vin SAHA	0.50 0.50	-0.76	2	5FU Erlotinib	0.50 0.50	1.72	2.48	bok	2	CBL Vin	0.50 0.50	-0.38	2	Vin SAHA	0.50 0.50	-0.76	0.38
524	2	0.29	0	0	0	0	0	0.71	0	2	Vin SAHA	0.50 0.50	-0.74	2	5FU Erlotinib	0.50 0.50	1.72	2.46	bok	2	CBL Vin	0.50 0.50	-0.34	2	Vin SAHA	0.50 0.50	-0.74	0.4
525	2	0.3	0	0	0	0	0	0.7	0	2	Vin SAHA	0.50 0.50	-0.72	2	5FU Erlotinib	0.50 0.50	1.74	2.46	bok	2	CBL Vin	0.50 0.50	-0.3	2	Vin SAHA	0.50 0.50	-0.72	0.42
526	2	0.31	0	0	0	0	0	0.69	0	2	Vin SAHA	0.50 0.50	-0.7	2	5FU Erlotinib	0.50 0.50	1.74	2.44	bok	2	CBL Vin	0.50 0.50	-0.26	2	Vin SAHA	0.50 0.50	-0.7	0.44
527	2	0.32	0	0	0	0	0	0.68	0	2	Vin SAHA	0.50 0.50	-0.68	2	5FU Erlotinib	0.50 0.50	1.76	2.44	bok	2	CBL Vin	0.50 0.50	-0.22	2	Vin SAHA	0.50 0.50	-0.68	0.46
528	2	0.33	0	0	0	0	0	0.67	0	2	Vin SAHA	0.50 0.50	-0.64	2	5FU Erlotinib	0.50 0.50	1.76	2.4	bok	2	CBL Vin	0.50 0.50	-0.18	2	Vin SAHA	0.50 0.50	-0.64	0.46
529	2	0.34	0	0	0	0	0	0.66	0	2	Vin SAHA	0.50 0.50	-0.62	2	5FU Erlotinib	0.50 0.50	1.78	2.4	bok	2	CBL Vin	0.50 0.50	-0.14	2	Vin SAHA	0.50 0.50	-0.62	0.48
530	2	0.35	0	0	0	0	0	0.65	0	2	Vin SAHA	0.50 0.50	-0.6	2	5FU Erlotinib	0.50 0.50	1.78	2.38	bok	2	CBL Vin	0.50 0.50	-0.1	2	Vin SAHA	0.50 0.50	-0.6	0.5
531	2	0.36	0	0	0	0	0	0.64	0	2	Vin SAHA	0.50 0.50	-0.58	2	5FU Erlotinib	0.50 0.50	1.8	2.38	bok	2	CBL Vin	0.50 0.50	-0.06	2	Vin SAHA	0.50 0.50	-0.58	0.52
532	2	0.37	0	0	0	0	0	0.63	0	2	Vin SAHA	0.50 0.50	-0.56	2	5FU Erlotinib	0.50 0.50	1.8	2.36	bok	2	CBL Vin	0.50 0.50	-0.02	2	Vin SAHA	0.50 0.50	-0.56	0.54
533	2	0.38	0	0	0	0	0	0.62	0	2	Vin SAHA	0.50 0.50	-0.54	2	5FU Erlotinib	0.50 0.50	1.82	2.36	bok	2	CBL Vin	0.50 0.50	0.02	2	Vin SAHA	0.50 0.50	-0.54	0.56
534	2	0.39	0	0	0	0	0	0.61	0	2	Vin SAHA	0.50 0.50	-0.52	2	5FU Erlotinib	0.50 0.50	1.82	2.34	bok	2	CBL Vin	0.50 0.50	0.06	2	Vin SAHA	0.50 0.50	-0.52	0.58
535	2	0.4	0	0	0	0	0	0.6	0	2	Vin SAHA	0.50 0.50	-0.48	2	5FU Erlotinib	0.50 0.50	1.82	2.3	bok	2	CBL Vin	0.50 0.50	0.1	2	Vin SAHA	0.50 0.50	-0.48	0.58
536	2	0.41	0	0	0	0	0	0.59	0	2	Vin SAHA	0.50 0.50	-0.46	2	5FU Erlotinib	0.50 0.50	1.84	2.3	bok	2	CBL Vin	0.50 0.50	0.14	2	Vin SAHA	0.50 0.50	-0.46	0.6
537	2	0.42	0	0	0	0	0	0.58	0	2	Vin SAHA	0.50 0.50	-0.44	2	5FU Erlotinib	0.50 0.50	1.84	2.28	bok	2	CBL Vin	0.50 0.50	0.16	2	Vin SAHA	0.50 0.50	-0.44	0.6
538	2	0.43	0	0	0	0	0	0.57	0	2	Vin SAHA	0.50 0.50	-0.42	2	5FU Erlotinib	0.50 0.50	1.86	2.28	bok	2	CBL Vin	0.50 0.50	0.2	2	Vin SAHA	0.50 0.50	-0.42	0.62
539	2	0.44	0	0	0	0	0	0.56	0	2	Vin SAHA	0.50 0.50	-0.4	2	5FU Erlotinib	0.50 0.50	1.86	2.26	bok	2	CBL Vin	0.50 0.50	0.24	2	Vin SAHA	0.50 0.50	-0.4	0.64
540	2	0.45	0	0	0	0	0	0.55	0	2	Vin SAHA	0.50 0.50	-0.38	2	5FU Erlotinib	0.50 0.50	1.88	2.26	bok	2	CBL Vin	0.50 0.50	0.28	2	Vin SAHA	0.50 0.50	-0.38	0.66
541	2	0.46	0	0	0	0	0	0.54	0	2	Vin SAHA	0.50 0.50	-0.34	2	5FU Erlotinib	0.50 0.50	1.88	2.22	bok	2	CBL Vin	0.50 0.50	0.32	2	Vin SAHA	0.50 0.50	-0.34	0.66
542	2	0.47	0	0	0	0	0	0.53	0	2	Vin SAHA	0.50 0.50	-0.32	2	5FU Erlotinib	0.50 0.50	1.9	2.22	bok	2	CBL Vin	0.50 0.50	0.36	2	Vin SAHA	0.50 0.50	-0.32	0.68
543	2	0.48	0	0	0	0	0	0.52	0	2	Vin SAHA	0.50 0.50	-0.3	2	5FU Erlotinib	0.50 0.50	1.9	2.2	bok	2	CBL Vin	0.50 0.50	0.4	2	Vin SAHA	0.50 0.50	-0.3	0.7
544	2	0.49	0	0	0	0	0	0.51	0	2	Vin SAHA	0.50 0.50	-0.28	2	5FU Erlotinib	0.50 0.50	1.9	2.18	bok	2	CBL Vin	0.50 0.50	0.44	2	Vin SAHA	0.50 0.50	-0.28	0.72
545	2	0.5	0	0	0	0	0	0.5	0	2	Vin SAHA	0.50 0.50	-0.26	2	5FU Erlotinib	0.50 0.50	1.92	2.18	bok	2	CBL Vin	0.50 0.50	0.48	2	Vin SAHA	0.50 0.50	-0.26	0.74
546	2	0.51	0	0	0	0	0	0.49	0	2	Vin SAHA	0.50 0.50	-0.24	2	5FU Erlotinib	0.50 0.50	1.92	2.16	p53	2	Sunitinib SAHA	0.50 0.50	0.22	2	Vin SAHA	0.50 0.50	-0.24	0.46
547	2	0.52	0	0	0	0	0	0.48	0	2	Vin SAHA	0.50 0.50	-0.2	2	5FU Erlotinib	0.50 0.50	1.94	2.14	p53	2	Sunitinib SAHA	0.50 0.50	0.24	2	Vin SAHA	0.50 0.50	-0.2	0.44
548	2	0.53	0	0	0	0	0	0.47	0	2	Vin SAHA	0.50 0.50	-0.18	2	5FU Erlotinib	0.50 0.50	1.94	2.12	p53	2	Sunitinib SAHA	0.50 0.50	0.24	2	Vin SAHA	0.50 0.50	-0.18	0.42
549	2	0.54	0	0	0	0	0	0.46	0	2	Vin SAHA	0.50 0.50	-0.16	2	5FU Erlotinib	0.50 0.50	1.96	2.12	p53	2	Sunitinib SAHA	0.50 0.50	0.24	2	Vin SAHA	0.50 0.50	-0.16	0.4
550	2	0.55	0	0	0	0	0	0.45	0	2	Vin SAHA	0.50 0.50	-0.14	2	5FU Erlotinib	0.50 0.50	1.96	2.1	p53	2	Sunitinib SAHA	0.50 0.50	0.26	2	Vin SAHA	0.50 0.50	-0.14	0.4
551	2	0.56	0	0	0	0	0	0.44	0	2	Vin SAHA	0.50 0.50	-0.12	2	5FU Erlotinib	0.50 0.50	1.98	2.1	p53	2	Sunitinib SAHA	0.50 0.50	0.26	2	Vin SAHA	0.50 0.50	-0.12	0.38
552	2	0.57	0	0	0	0	0	0.43	0	2	Vin SAHA	0.50 0.50	-0.1	2	5FU IRT	0.50 0.50	2	2.1	p53	2	Sunitinib SAHA	0.50 0.50	0.28	2	Vin SAHA	0.50 0.50	-0.1	0.38
553	2	0.58	0	0	0	0	0	0.42	0	2	Vin SAHA	0.50 0.50	-0.08	2	5FU IRT	0.50 0.50	2.02	2.1	p53	2	Sunitinib SAHA	0.50 0.50	0.28	2	Vin SAHA	0.50 0.50	-0.08	0.36
554	2	0.59	0	0	0	0	0	0.41	0	2	Vin SAHA	0.50 0.50	-0.04	2	5FU IRT	0.50 0.50	2.04	2.08	p53	2	Sunitinib SAHA	0.50 0.50	0.3	2	Vin SAHA	0.50 0.50	-0.04	0.34
555	2	0.6	0	0	0	0	0	0.4	0	2	Vin SAHA	0.50 0.50	-0.02	2	5FU IRT	0.50 0.50	2.06	2.08	p53	2	Sunitinib SAHA	0.50 0.50	0.3	2	Vin SAHA	0.50 0.50	-0.02	0.32
556	2	0.61	0	0	0	0	0	0.39	0	2	Vin SAHA	0.50 0.50	0	2	5FU IRT	0.50 0.50	2.1	2.1	p53	2	Sunitinib SAHA	0.50 0.50	0.3	2	Vin SAHA	0.50 0.50	0	0.3
557	2	0.62	0	0	0	0	0	0.38	0	2	Vin SAHA	0.50 0.50	0.02	2	5FU IRT	0.50 0.50	2.12	2.1	p53	2	Sunitinib SAHA	0.50 0.50	0.32	2	Vin SAHA	0.50 0.50	0.02	0.3
558	2	0.63	0	0	0	0	0	0.37	0	2	Vin SAHA	0.50 0.50	0.04	2	5FU IRT	0.50 0.50	2.14	2.1	p53	2	Sunitinib SAHA	0.50 0.50	0.32	2	Vin SAHA	0.50 0.50	0.04	0.28
559	2	0.64	0	0	0	0	0	0.36	0	2	Vin SAHA	0.50 0.50	0.06	2	CBL 5FU	0.50 0.50	2.16	2.1	p53	2	Sunitinib SAHA	0.50 0.50	0.34	2	Vin SAHA	0.50 0.50	0.06	0.28
560	2	0.65	0	0	0	0	0	0.35	0	2	Vin SAHA	0.50 0.50	0.1	2	CBL 5FU	0.50 0.50	2.2	2.1	p53	2	Sunitinib SAHA	0.50 0.50	0.34	2	Vin SAHA	0.50 0.50	0.1	0.24
561	2	0.66	0	0	0	0	0	0.34	0	2	Vin SAHA	0.50 0.50	0.12	2	CBL 5FU	0.50 0.50	2.22	2.1	p53	2	Sunitinib SAHA	0.50 0.50	0.34	2	Vin SAHA	0.50 0.50	0.12	0.22
562	2	0.67	0	0	0	0	0	0.33	0	2	Vin SAHA	0.50 0.50	0.14	2	CBL 5FU	0.50 0.50	2.24	2.1	p53	2	Sunitinib SAHA	0.50 0.50	0.36	2	Vin SAHA	0.50 0.50	0.14	0.22
563	2	0.68	0	0	0	0	0	0.32	0	2	Vin SAHA	0.50 0.50	0.16	2	CBL IRT	0.50 0.50	2.28	2.12	p53	2	Sunitinib SAHA	0.50 0.50	0.36	2	Vin SAHA	0.50 0.50	0.16	0.2
564	2	0.69	0	0	0	0	0	0.31	0	2	Vin SAHA	0.50 0.50	0.18	2	CBL IRT	0.50 0.50	2.32	2.14	p53	2	Sunitinib SAHA	0.50 0.50	0.38	2	Vin SAHA	0.50 0.50	0.18	0.2
565	2	0.7	0	0	0	0	0	0.3	0	2	Vin SAHA	0.50 0.50	0.2	2	CBL IRT	0.50 0.50	2.36	2.16	p53	2	Sunitinib SAHA	0.50 0.50	0.38	2	Vin SAHA	0.50 0.50	0.2	0.18
566	2	0.71	0	0	0	0	0	0.29	0	2	Vin SAHA	0.50 0.50	0.24	2	CBL IRT	0.50 0.50	2.4	2.16	p53	2	Sunitinib SAHA	0.50 0.50	0.38	2	Vin SAHA	0.50 0.50	0.24	0.14
567	2	0.72	0	0	0	0	0	0.28	0	2	Vin SAHA	0.50 0.50	0.26	2	CBL IRT	0.50 0.50	2.44	2.18	p53	2	Sunitinib SAHA	0.50 0.50	0.4	2	Vin SAHA	0.50 0.50	0.26	0.14
568	2	0.73	0	0	0	0	0	0.27	0	2	Vin SAHA	0.50 0.50	0.28	2	CBL IRT	0.50 0.50	2.5	2.22	p53	2	Sunitinib SAHA	0.50 0.50	0.4	2	Vin SAHA	0.50 0.50	0.28	0.12
569	2	0.74	0	0	0	0	0	0.26	0	2	Vin SAHA	0.50 0.50	0.3	2	CBL IRT	0.50 0.50	2.54	2.24	p53	2	Sunitinib SAHA	0.50 0.50	0.42	2	Vin SAHA	0.50 0.50	0.3	0.12
570	2	0.75	0	0	0	0	0	0.25	0	2	Vin SAHA	0.50 0.50	0.32	2	CBL IRT	0.50 0.50	2.58	2.26	p53	2	Sunitinib SAHA	0.50 0.50	0.42	2	Vin SAHA	0.50 0.50	0.32	0.1
571	2	0.76	0	0	0	0	0	0.24	0	2	Vin SAHA	0.50 0.50	0.34	2	CBL IRT	0.50 0.50	2.62	2.28	p53	2	Sunitinib SAHA	0.50 0.50	0.42	2	Vin SAHA	0.50 0.50	0.34	0.08
572	2	0.77	0	0	0	0	0	0.23	0	2	Vin SAHA	0.50 0.50	0.38	2	CBL IRT	0.50 0.50	2.66	2.28	p53	2	Sunitinib SAHA	0.50 0.50	0.44	2	Vin SAHA	0.50 0.50	0.38	0.06
573	2	0.78	0	0	0	0	0	0.22	0	2	Vin SAHA	0.50 0.50	0.4	2	CBL IRT	0.50 0.50	2.7	2.3	p53	2	Sunitinib SAHA	0.50 0.50	0.44	2	Vin SAHA	0.50 0.50	0.4	0.04
574	2	0.79	0	0	0	0	0	0.21	0	2	Vin SAHA	0.50 0.50	0.42	2	CBL IRT	0.50 0.50	2.74	2.32	p53	2	Sunitinib SAHA	0.50 0.50	0.46	2	Vin SAHA	0.50 0.50	0.42	0.04
575	2	0.8	0	0	0	0	0	0.2	0	2	Vin SAHA	0.50 0.50	0.44	2	CBL IRT	0.50 0.50	2.8	2.36	p53	2	Sunitinib SAHA	0.50 0.50	0.46	2	Vin SAHA	0.50 0.50	0.44	0.02
576	2	0.81	0	0	0	0	0	0.19	0	2	Vin SAHA	0.50 0.50	0.46	2	CBL IRT	0.50 0.50	2.84	2.38	p53	2	Sunitinib SAHA	0.50 0.50	0.46	2	Vin SAHA	0.50 0.50	0.46	0
577	2	0.82	0	0	0	0	0	0.18	0	2	Sunitinib SAHA	0.50 0.50	0.48	2	CBL IRT	0.50 0.50	2.88	2.4	p53	2	Sunitinib SAHA	0.50 0.50	0.48	2	Sunitinib SAHA	0.50 0.50	0.48	0
578	2	0.83	0	0	0	0	0	0.17	0	2	Sunitinib SAHA	0.50 0.50	0.48	2	CBL IRT	0.50 0.50	2.92	2.44	p53	2	Sunitinib SAHA	0.50 0.50	0.48	2	Sunitinib SAHA	0.50 0.50	0.48	0
579	2	0.84	0	0	0	0	0	0.16	0	2	Sunitinib SAHA	0.50 0.50	0.5	2	CBL IRT	0.50 0.50	2.96	2.46	p53	2	Sunitinib SAHA	0.50 0.50	0.5	2	Sunitinib SAHA	0.50 0.50	0.5	0
580	2	0.85	0	0	0	0	0	0.15	0	2	Sunitinib SAHA	0.50 0.50	0.5	2	CBL IRT	0.50 0.50	3	2.5	p53	2	Sunitinib SAHA	0.50 0.50	0.5	2	Sunitinib SAHA	0.50 0.50	0.5	0
581	2	0.86	0	0	0	0	0	0.14	0	2	Sunitinib SAHA	0.50 0.50	0.5	2	CBL IRT	0.50 0.50	3.04	2.54	p53	2	Sunitinib SAHA	0.50 0.50	0.5	2	Sunitinib SAHA	0.50 0.50	0.5	0
582	2	0.87	0	0	0	0	0	0.13	0	2	Sunitinib SAHA	0.50 0.50	0.52	2	CBL IRT	0.50 0.50	3.1	2.58	p53	2	Sunitinib SAHA	0.50 0.50	0.52	2	Sunitinib SAHA	0.50 0.50	0.52	0
583	2	0.88	0	0	0	0	0	0.12	0	2	Sunitinib SAHA	0.50 0.50	0.52	2	CBL IRT	0.50 0.50	3.14	2.62	p53	2	Sunitinib SAHA	0.50 0.50	0.52	2	Sunitinib SAHA	0.50 0.50	0.52	0
584	2	0.89	0	0	0	0	0	0.11	0	2	Sunitinib SAHA	0.50 0.50	0.54	2	CBL IRT	0.50 0.50	3.18	2.64	p53	2	Sunitinib SAHA	0.50 0.50	0.54	2	Sunitinib SAHA	0.50 0.50	0.54	0
585	2	0.9	0	0	0	0	0	0.1	0	2	Sunitinib SAHA	0.50 0.50	0.54	2	CBL IRT	0.50 0.50	3.22	2.68	p53	2	Sunitinib SAHA	0.50 0.50	0.54	2	Sunitinib SAHA	0.50 0.50	0.54	0
586	2	0.91	0	0	0	0	0	0.09	0	2	Sunitinib SAHA	0.50 0.50	0.54	2	CBL IRT	0.50 0.50	3.26	2.72	p53	2	Sunitinib SAHA	0.50 0.50	0.54	2	Sunitinib SAHA	0.50 0.50	0.54	0
587	2	0.92	0	0	0	0	0	0.08	0	2	Sunitinib SAHA	0.50 0.50	0.56	2	CBL IRT	0.50 0.50	3.3	2.74	p53	2	Sunitinib SAHA	0.50 0.50	0.56	2	Sunitinib SAHA	0.50 0.50	0.56	0
588	2	0.93	0	0	0	0	0	0.07	0	2	Sunitinib SAHA	0.50 0.50	0.56	2	CBL IRT	0.50 0.50	3.34	2.78	p53	2	Sunitinib SAHA	0.50 0.50	0.56	2	Sunitinib SAHA	0.50 0.50	0.56	0
589	2	0.94	0	0	0	0	0	0.06	0	2	Sunitinib SAHA	0.50 0.50	0.58	2	CBL IRT	0.50 0.50	3.4	2.82	p53	2	Sunitinib SAHA	0.50 0.50	0.58	2	Sunitinib SAHA	0.50 0.50	0.58	0
590	2	0.95	0	0	0	0	0	0.05	0	2	Sunitinib SAHA	0.50 0.50	0.58	2	CBL IRT	0.50 0.50	3.44	2.86	p53	2	Sunitinib SAHA	0.50 0.50	0.58	2	Sunitinib SAHA	0.50 0.50	0.58	0
591	2	0.96	0	0	0	0	0	0.04	0	2	Sunitinib SAHA	0.50 0.50	0.58	2	CBL IRT	0.50 0.50	3.48	2.9	p53	2	Sunitinib SAHA	0.50 0.50	0.58	2	Sunitinib SAHA	0.50 0.50	0.58	0
592	2	0.97	0	0	0	0	0	0.03	0	2	Sunitinib SAHA	0.50 0.50	0.6	2	CBL IRT	0.50 0.50	3.52	2.92	p53	2	Sunitinib SAHA	0.50 0.50	0.6	2	Sunitinib SAHA	0.50 0.50	0.6	0
593	2	0.98	0	0	0	0	0	0.02	0	2	Sunitinib SAHA	0.50 0.50	0.6	2	CBL IRT	0.50 0.50	3.56	2.96	p53	2	Sunitinib SAHA	0.50 0.50	0.6	2	Sunitinib SAHA	0.50 0.50	0.6	0
594	2	0.99	0	0	0	0	0	0.01	0	2	Sunitinib SAHA	0.50 0.50	0.62	2	CBL IRT	0.50 0.50	3.6	2.98	p53	2	Sunitinib SAHA	0.50 0.50	0.62	2	Sunitinib SAHA	0.50 0.50	0.62	0
595	2	0.01	0	0	0	0	0	0	0.99	2	CBL Vin	0.50 0.50	0.36	2	Erlotinib SAHA	0.50 0.50	2.76	2.4	bim	2	CBL Vin	0.50 0.50	0.36	2	CBL Vin	0.50 0.50	0.36	0
596	2	0.02	0	0	0	0	0	0	0.98	2	CBL Vin	0.50 0.50	0.38	2	Erlotinib SAHA	0.50 0.50	2.74	2.36	bim	2	CBL Vin	0.50 0.50	0.38	2	CBL Vin	0.50 0.50	0.38	0
597	2	0.03	0	0	0	0	0	0	0.97	2	CBL Vin	0.50 0.50	0.4	2	Erlotinib SAHA	0.50 0.50	2.72	2.32	bim	2	CBL Vin	0.50 0.50	0.4	2	CBL Vin	0.50 0.50	0.4	0
598	2	0.04	0	0	0	0	0	0	0.96	2	Vin ActD	0.50 0.50	0.42	2	Erlotinib SAHA	0.50 0.50	2.72	2.3	bim	2	CBL Vin	0.50 0.50	0.42	2	Vin ActD	0.50 0.50	0.42	0
599	2	0.05	0	0	0	0	0	0	0.95	2	Vin ActD	0.50 0.50	0.44	2	Erlotinib SAHA	0.50 0.50	2.7	2.26	bim	2	CBL Vin	0.50 0.50	0.44	2	Vin ActD	0.50 0.50	0.44	0
600	2	0.06	0	0	0	0	0	0	0.94	2	Vin ActD	0.50 0.50	0.46	2	Erlotinib SAHA	0.50 0.50	2.68	2.22	bim	2	CBL Vin	0.50 0.50	0.46	2	Vin ActD	0.50 0.50	0.46	0
601	2	0.07	0	0	0	0	0	0	0.93	2	Vin ActD	0.50 0.50	0.48	2	Erlotinib SAHA	0.50 0.50	2.68	2.2	bim	2	CBL Vin	0.50 0.50	0.48	2	Vin ActD	0.50 0.50	0.48	0
602	2	0.08	0	0	0	0	0	0	0.92	2	Vin ActD	0.50 0.50	0.5	2	Erlotinib SAHA	0.50 0.50	2.66	2.16	bim	2	CBL Vin	0.50 0.50	0.5	2	Vin ActD	0.50 0.50	0.5	0
603	2	0.09	0	0	0	0	0	0	0.91	2	Vin ActD	0.50 0.50	0.52	2	Erlotinib SAHA	0.50 0.50	2.64	2.12	bim	2	CBL Vin	0.50 0.50	0.54	2	Vin ActD	0.50 0.50	0.52	0.02
604	2	0.1	0	0	0	0	0	0	0.9	2	Vin ActD	0.50 0.50	0.52	2	Erlotinib SAHA	0.50 0.50	2.64	2.12	bim	2	CBL Vin	0.50 0.50	0.56	2	Vin ActD	0.50 0.50	0.52	0.04
605	2	0.11	0	0	0	0	0	0	0.89	2	Vin ActD	0.50 0.50	0.54	2	Erlotinib SAHA	0.50 0.50	2.62	2.08	bim	2	CBL Vin	0.50 0.50	0.58	2	Vin ActD	0.50 0.50	0.54	0.04
606	2	0.12	0	0	0	0	0	0	0.88	2	Vin ActD	0.50 0.50	0.56	2	Erlotinib SAHA	0.50 0.50	2.6	2.04	bim	2	CBL Vin	0.50 0.50	0.6	2	Vin ActD	0.50 0.50	0.56	0.04
607	2	0.13	0	0	0	0	0	0	0.87	2	Vin ActD	0.50 0.50	0.58	2	Erlotinib SAHA	0.50 0.50	2.6	2.02	bim	2	CBL Vin	0.50 0.50	0.62	2	Vin ActD	0.50 0.50	0.58	0.04
608	2	0.14	0	0	0	0	0	0	0.86	2	Vin ActD	0.50 0.50	0.6	2	Erlotinib SAHA	0.50 0.50	2.58	1.98	bim	2	CBL Vin	0.50 0.50	0.64	2	Vin ActD	0.50 0.50	0.6	0.04
609	2	0.15	0	0	0	0	0	0	0.85	2	Vin ActD	0.50 0.50	0.62	2	Erlotinib SAHA	0.50 0.50	2.56	1.94	bim	2	CBL Vin	0.50 0.50	0.66	2	Vin ActD	0.50 0.50	0.62	0.04
610	2	0.16	0	0	0	0	0	0	0.84	2	Vin ActD	0.50 0.50	0.64	2	Erlotinib SAHA	0.50 0.50	2.56	1.92	bim	2	CBL Vin	0.50 0.50	0.68	2	Vin ActD	0.50 0.50	0.64	0.04
611	2	0.17	0	0	0	0	0	0	0.83	2	Vin ActD	0.50 0.50	0.66	2	Erlotinib SAHA	0.50 0.50	2.54	1.88	bim	2	CBL Vin	0.50 0.50	0.7	2	Vin ActD	0.50 0.50	0.66	0.04
612	2	0.18	0	0	0	0	0	0	0.82	2	Vin ActD	0.50 0.50	0.66	2	Erlotinib SAHA	0.50 0.50	2.52	1.86	bim	2	CBL Vin	0.50 0.50	0.72	2	Vin ActD	0.50 0.50	0.66	0.06
613	2	0.19	0	0	0	0	0	0	0.81	2	Vin ActD	0.50 0.50	0.68	2	Erlotinib SAHA	0.50 0.50	2.52	1.84	bim	2	CBL Vin	0.50 0.50	0.74	2	Vin ActD	0.50 0.50	0.68	0.06
614	2	0.2	0	0	0	0	0	0	0.8	2	Vin ActD	0.50 0.50	0.7	2	Erlotinib SAHA	0.50 0.50	2.5	1.8	bim	2	CBL Vin	0.50 0.50	0.76	2	Vin ActD	0.50 0.50	0.7	0.06
615	2	0.21	0	0	0	0	0	0	0.79	2	Vin ActD	0.50 0.50	0.72	2	Erlotinib SAHA	0.50 0.50	2.48	1.76	bim	2	CBL Vin	0.50 0.50	0.78	2	Vin ActD	0.50 0.50	0.72	0.06
616	2	0.22	0	0	0	0	0	0	0.78	2	Vin ActD	0.50 0.50	0.74	2	Erlotinib SAHA	0.50 0.50	2.48	1.74	bim	2	CBL Vin	0.50 0.50	0.8	2	Vin ActD	0.50 0.50	0.74	0.06
617	2	0.23	0	0	0	0	0	0	0.77	2	Vin ActD	0.50 0.50	0.76	2	Erlotinib SAHA	0.50 0.50	2.46	1.7	bim	2	CBL Vin	0.50 0.50	0.82	2	Vin ActD	0.50 0.50	0.76	0.06
618	2	0.24	0	0	0	0	0	0	0.76	2	Vin ActD	0.50 0.50	0.78	2	Erlotinib SAHA	0.50 0.50	2.44	1.66	bim	2	CBL Vin	0.50 0.50	0.84	2	Vin ActD	0.50 0.50	0.78	0.06
619	2	0.25	0	0	0	0	0	0	0.75	2	Vin ActD	0.50 0.50	0.8	2	Erlotinib SAHA	0.50 0.50	2.44	1.64	bim	2	CBL Vin	0.50 0.50	0.86	2	Vin ActD	0.50 0.50	0.8	0.06
620	2	0.26	0	0	0	0	0	0	0.74	2	Vin 17AAG	0.50 0.50	0.8	2	Erlotinib SAHA	0.50 0.50	2.42	1.62	bim	2	CBL Vin	0.50 0.50	0.88	2	Vin 17AAG	0.50 0.50	0.8	0.08
621	2	0.27	0	0	0	0	0	0	0.73	2	Vin 17AAG	0.50 0.50	0.8	2	Erlotinib SAHA	0.50 0.50	2.4	1.6	bim	2	CBL Vin	0.50 0.50	0.9	2	Vin 17AAG	0.50 0.50	0.8	0.1
622	2	0.28	0	0	0	0	0	0	0.72	2	Vin 17AAG	0.50 0.50	0.8	2	Erlotinib SAHA	0.50 0.50	2.4	1.6	bim	2	CBL Vin	0.50 0.50	0.92	2	Vin 17AAG	0.50 0.50	0.8	0.12
623	2	0.29	0	0	0	0	0	0	0.71	2	Vin 17AAG	0.50 0.50	0.82	2	Erlotinib SAHA	0.50 0.50	2.38	1.56	bim	2	CBL Vin	0.50 0.50	0.94	2	Vin 17AAG	0.50 0.50	0.82	0.12
624	2	0.3	0	0	0	0	0	0	0.7	2	Vin Sunitinib	0.50 0.50	0.82	2	Erlotinib SAHA	0.50 0.50	2.36	1.54	bim	2	CBL Vin	0.50 0.50	0.96	2	Vin Sunitinib	0.50 0.50	0.82	0.14
625	2	0.31	0	0	0	0	0	0	0.69	2	Vin Sunitinib	0.50 0.50	0.82	2	Erlotinib SAHA	0.50 0.50	2.36	1.54	bim	2	CBL Vin	0.50 0.50	0.98	2	Vin Sunitinib	0.50 0.50	0.82	0.16
626	2	0.32	0	0	0	0	0	0	0.68	2	Vin Sunitinib	0.50 0.50	0.82	2	5FU Erlotinib	0.50 0.50	2.34	1.52	bim	2	CBL Vin	0.50 0.50	1	2	Vin Sunitinib	0.50 0.50	0.82	0.18
627	2	0.33	0	0	0	0	0	0	0.67	2	Vin Sunitinib	0.50 0.50	0.82	2	IRT Erlotinib	0.50 0.50	2.34	1.52	bim	2	CBL Vin	0.50 0.50	1.02	2	Vin Sunitinib	0.50 0.50	0.82	0.2
628	2	0.34	0	0	0	0	0	0	0.66	2	Vin Sunitinib	0.50 0.50	0.82	2	IRT Erlotinib	0.50 0.50	2.36	1.54	bim	2	CBL Vin	0.50 0.50	1.04	2	Vin Sunitinib	0.50 0.50	0.82	0.22
629	2	0.35	0	0	0	0	0	0	0.65	2	Vin Sunitinib	0.50 0.50	0.82	2	IRT Erlotinib	0.50 0.50	2.36	1.54	bim	2	CBL Vin	0.50 0.50	1.06	2	Vin Sunitinib	0.50 0.50	0.82	0.24
630	2	0.36	0	0	0	0	0	0	0.64	2	Vin Sunitinib	0.50 0.50	0.82	2	IRT Erlotinib	0.50 0.50	2.38	1.56	bim	2	CBL Vin	0.50 0.50	1.08	2	Vin Sunitinib	0.50 0.50	0.82	0.26
631	2	0.37	0	0	0	0	0	0	0.63	2	Vin Sunitinib	0.50 0.50	0.82	2	IRT Erlotinib	0.50 0.50	2.38	1.56	bim	2	CBL Vin	0.50 0.50	1.12	2	Vin Sunitinib	0.50 0.50	0.82	0.3
632	2	0.38	0	0	0	0	0	0	0.62	2	Vin Sunitinib	0.50 0.50	0.82	2	IRT Erlotinib	0.50 0.50	2.4	1.58	bim	2	CBL Vin	0.50 0.50	1.14	2	Vin Sunitinib	0.50 0.50	0.82	0.32
633	2	0.39	0	0	0	0	0	0	0.61	2	Vin Sunitinib	0.50 0.50	0.82	2	IRT Erlotinib	0.50 0.50	2.4	1.58	bim	2	CBL Vin	0.50 0.50	1.16	2	Vin Sunitinib	0.50 0.50	0.82	0.34
634	2	0.4	0	0	0	0	0	0	0.6	2	Vin Sunitinib	0.50 0.50	0.82	2	IRT Erlotinib	0.50 0.50	2.4	1.58	bim	2	CBL Vin	0.50 0.50	1.18	2	Vin Sunitinib	0.50 0.50	0.82	0.36
635	2	0.41	0	0	0	0	0	0	0.59	2	Vin Sunitinib	0.50 0.50	0.82	2	IRT Erlotinib	0.50 0.50	2.42	1.6	bim	2	CBL Vin	0.50 0.50	1.2	2	Vin Sunitinib	0.50 0.50	0.82	0.38
636	2	0.42	0	0	0	0	0	0	0.58	2	Vin Sunitinib	0.50 0.50	0.82	2	IRT Erlotinib	0.50 0.50	2.42	1.6	bim	2	CBL Vin	0.50 0.50	1.22	2	Vin Sunitinib	0.50 0.50	0.82	0.4
637	2	0.43	0	0	0	0	0	0	0.57	2	Vin Sunitinib	0.50 0.50	0.82	2	IRT Erlotinib	0.50 0.50	2.44	1.62	bim	2	CBL Vin	0.50 0.50	1.24	2	Vin Sunitinib	0.50 0.50	0.82	0.42
638	2	0.44	0	0	0	0	0	0	0.56	2	Vin Sunitinib	0.50 0.50	0.84	2	IRT Erlotinib	0.50 0.50	2.44	1.6	bim	2	CBL Vin	0.50 0.50	1.26	2	Vin Sunitinib	0.50 0.50	0.84	0.42
639	2	0.45	0	0	0	0	0	0	0.55	2	Vin Sunitinib	0.50 0.50	0.84	2	IRT Erlotinib	0.50 0.50	2.44	1.6	bim	2	CBL Vin	0.50 0.50	1.28	2	Vin Sunitinib	0.50 0.50	0.84	0.44
640	2	0.46	0	0	0	0	0	0	0.54	2	Vin Sunitinib	0.50 0.50	0.84	2	IRT Erlotinib	0.50 0.50	2.46	1.62	bim	2	CBL Vin	0.50 0.50	1.3	2	Vin Sunitinib	0.50 0.50	0.84	0.46
641	2	0.47	0	0	0	0	0	0	0.53	2	Vin Sunitinib	0.50 0.50	0.84	2	IRT Erlotinib	0.50 0.50	2.46	1.62	bim	2	CBL Vin	0.50 0.50	1.32	2	Vin Sunitinib	0.50 0.50	0.84	0.48
642	2	0.48	0	0	0	0	0	0	0.52	2	Vin Sunitinib	0.50 0.50	0.84	2	IRT Erlotinib	0.50 0.50	2.48	1.64	bim	2	CBL Vin	0.50 0.50	1.34	2	Vin Sunitinib	0.50 0.50	0.84	0.5
643	2	0.49	0	0	0	0	0	0	0.51	2	Vin Sunitinib	0.50 0.50	0.84	2	IRT Erlotinib	0.50 0.50	2.48	1.64	bim	2	CBL Vin	0.50 0.50	1.36	2	Vin Sunitinib	0.50 0.50	0.84	0.52
644	2	0.5	0	0	0	0	0	0	0.5	2	Vin Sunitinib	0.50 0.50	0.84	2	IRT Erlotinib	0.50 0.50	2.5	1.66	bim	2	CBL Vin	0.50 0.50	1.38	2	Vin Sunitinib	0.50 0.50	0.84	0.54
645	2	0.51	0	0	0	0	0	0	0.49	2	Vin Sunitinib	0.50 0.50	0.84	2	IRT Erlotinib	0.50 0.50	2.5	1.66	p53	2	Sunitinib SAHA	0.50 0.50	1.38	2	Vin Sunitinib	0.50 0.50	0.84	0.54
646	2	0.52	0	0	0	0	0	0	0.48	2	Vin Sunitinib	0.50 0.50	0.84	2	IRT Erlotinib	0.50 0.50	2.5	1.66	p53	2	Sunitinib SAHA	0.50 0.50	1.36	2	Vin Sunitinib	0.50 0.50	0.84	0.52
647	2	0.53	0	0	0	0	0	0	0.47	2	Vin Sunitinib	0.50 0.50	0.84	2	IRT Erlotinib	0.50 0.50	2.52	1.68	p53	2	Sunitinib SAHA	0.50 0.50	1.34	2	Vin Sunitinib	0.50 0.50	0.84	0.5
648	2	0.54	0	0	0	0	0	0	0.46	2	Vin Sunitinib	0.50 0.50	0.84	2	IRT Erlotinib	0.50 0.50	2.52	1.68	p53	2	Sunitinib SAHA	0.50 0.50	1.34	2	Vin Sunitinib	0.50 0.50	0.84	0.5
649	2	0.55	0	0	0	0	0	0	0.45	2	Vin Sunitinib	0.50 0.50	0.84	2	IRT Erlotinib	0.50 0.50	2.54	1.7	p53	2	Sunitinib SAHA	0.50 0.50	1.32	2	Vin Sunitinib	0.50 0.50	0.84	0.48
650	2	0.56	0	0	0	0	0	0	0.44	2	Vin Sunitinib	0.50 0.50	0.84	2	IRT Erlotinib	0.50 0.50	2.54	1.7	p53	2	Sunitinib SAHA	0.50 0.50	1.3	2	Vin Sunitinib	0.50 0.50	0.84	0.46
651	2	0.57	0	0	0	0	0	0	0.43	2	Vin Sunitinib	0.50 0.50	0.84	2	IRT Erlotinib	0.50 0.50	2.56	1.72	p53	2	Sunitinib SAHA	0.50 0.50	1.28	2	Vin Sunitinib	0.50 0.50	0.84	0.44
652	2	0.58	0	0	0	0	0	0	0.42	2	Vin Sunitinib	0.50 0.50	0.84	2	IRT Erlotinib	0.50 0.50	2.56	1.72	p53	2	Sunitinib SAHA	0.50 0.50	1.28	2	Vin Sunitinib	0.50 0.50	0.84	0.44
653	2	0.59	0	0	0	0	0	0	0.41	2	Vin Sunitinib	0.50 0.50	0.84	2	CBL IRT	0.50 0.50	2.58	1.74	p53	2	Sunitinib SAHA	0.50 0.50	1.26	2	Vin Sunitinib	0.50 0.50	0.84	0.42
654	2	0.6	0	0	0	0	0	0	0.4	2	Vin Sunitinib	0.50 0.50	0.84	2	CBL IRT	0.50 0.50	2.6	1.76	p53	2	Sunitinib SAHA	0.50 0.50	1.24	2	Vin Sunitinib	0.50 0.50	0.84	0.4
655	2	0.61	0	0	0	0	0	0	0.39	2	Vin Sunitinib	0.50 0.50	0.84	2	CBL IRT	0.50 0.50	2.62	1.78	p53	2	Sunitinib SAHA	0.50 0.50	1.22	2	Vin Sunitinib	0.50 0.50	0.84	0.38
656	2	0.62	0	0	0	0	0	0	0.38	2	Vin Sunitinib	0.50 0.50	0.84	2	CBL IRT	0.50 0.50	2.66	1.82	p53	2	Sunitinib SAHA	0.50 0.50	1.22	2	Vin Sunitinib	0.50 0.50	0.84	0.38
657	2	0.63	0	0	0	0	0	0	0.37	2	Vin Sunitinib	0.50 0.50	0.84	2	CBL IRT	0.50 0.50	2.68	1.84	p53	2	Sunitinib SAHA	0.50 0.50	1.2	2	Vin Sunitinib	0.50 0.50	0.84	0.36
658	2	0.64	0	0	0	0	0	0	0.36	2	Vin Sunitinib	0.50 0.50	0.84	2	CBL IRT	0.50 0.50	2.7	1.86	p53	2	Sunitinib SAHA	0.50 0.50	1.18	2	Vin Sunitinib	0.50 0.50	0.84	0.34
659	2	0.65	0	0	0	0	0	0	0.35	2	Vin Sunitinib	0.50 0.50	0.84	2	CBL IRT	0.50 0.50	2.72	1.88	p53	2	Sunitinib SAHA	0.50 0.50	1.16	2	Vin Sunitinib	0.50 0.50	0.84	0.32
660	2	0.66	0	0	0	0	0	0	0.34	2	Vin Sunitinib	0.50 0.50	0.84	2	CBL IRT	0.50 0.50	2.76	1.92	p53	2	Sunitinib SAHA	0.50 0.50	1.14	2	Vin Sunitinib	0.50 0.50	0.84	0.3
661	2	0.67	0	0	0	0	0	0	0.33	2	Vin Sunitinib	0.50 0.50	0.86	2	CBL IRT	0.50 0.50	2.78	1.92	p53	2	Sunitinib SAHA	0.50 0.50	1.14	2	Vin Sunitinib	0.50 0.50	0.86	0.28
662	2	0.68	0	0	0	0	0	0	0.32	2	Vin Sunitinib	0.50 0.50	0.86	2	CBL IRT	0.50 0.50	2.8	1.94	p53	2	Sunitinib SAHA	0.50 0.50	1.12	2	Vin Sunitinib	0.50 0.50	0.86	0.26
663	2	0.69	0	0	0	0	0	0	0.31	2	Vin Sunitinib	0.50 0.50	0.86	2	CBL IRT	0.50 0.50	2.84	1.98	p53	2	Sunitinib SAHA	0.50 0.50	1.1	2	Vin Sunitinib	0.50 0.50	0.86	0.24
664	2	0.7	0	0	0	0	0	0	0.3	2	Vin Sunitinib	0.50 0.50	0.86	2	CBL IRT	0.50 0.50	2.86	2	p53	2	Sunitinib SAHA	0.50 0.50	1.08	2	Vin Sunitinib	0.50 0.50	0.86	0.22
665	2	0.71	0	0	0	0	0	0	0.29	2	Vin Sunitinib	0.50 0.50	0.86	2	CBL IRT	0.50 0.50	2.88	2.02	p53	2	Sunitinib SAHA	0.50 0.50	1.08	2	Vin Sunitinib	0.50 0.50	0.86	0.22
666	2	0.72	0	0	0	0	0	0	0.28	2	Vin Sunitinib	0.50 0.50	0.86	2	CBL IRT	0.50 0.50	2.92	2.06	p53	2	Sunitinib SAHA	0.50 0.50	1.06	2	Vin Sunitinib	0.50 0.50	0.86	0.2
667	2	0.73	0	0	0	0	0	0	0.27	2	Vin Sunitinib	0.50 0.50	0.86	2	CBL IRT	0.50 0.50	2.94	2.08	p53	2	Sunitinib SAHA	0.50 0.50	1.04	2	Vin Sunitinib	0.50 0.50	0.86	0.18
668	2	0.74	0	0	0	0	0	0	0.26	2	Vin Sunitinib	0.50 0.50	0.86	2	CBL IRT	0.50 0.50	2.96	2.1	p53	2	Sunitinib SAHA	0.50 0.50	1.02	2	Vin Sunitinib	0.50 0.50	0.86	0.16
669	2	0.75	0	0	0	0	0	0	0.25	2	Vin Sunitinib	0.50 0.50	0.86	2	CBL IRT	0.50 0.50	3	2.14	p53	2	Sunitinib SAHA	0.50 0.50	1	2	Vin Sunitinib	0.50 0.50	0.86	0.14
670	2	0.76	0	0	0	0	0	0	0.24	2	Vin Sunitinib	0.50 0.50	0.86	2	CBL IRT	0.50 0.50	3.02	2.16	p53	2	Sunitinib SAHA	0.50 0.50	1	2	Vin Sunitinib	0.50 0.50	0.86	0.14
671	2	0.77	0	0	0	0	0	0	0.23	2	Vin Sunitinib	0.50 0.50	0.86	2	CBL IRT	0.50 0.50	3.04	2.18	p53	2	Sunitinib SAHA	0.50 0.50	0.98	2	Vin Sunitinib	0.50 0.50	0.86	0.12
672	2	0.78	0	0	0	0	0	0	0.22	2	Vin Sunitinib	0.50 0.50	0.86	2	CBL IRT	0.50 0.50	3.08	2.22	p53	2	Sunitinib SAHA	0.50 0.50	0.96	2	Vin Sunitinib	0.50 0.50	0.86	0.1
673	2	0.79	0	0	0	0	0	0	0.21	2	Vin Sunitinib	0.50 0.50	0.86	2	CBL IRT	0.50 0.50	3.1	2.24	p53	2	Sunitinib SAHA	0.50 0.50	0.94	2	Vin Sunitinib	0.50 0.50	0.86	0.08
674	2	0.8	0	0	0	0	0	0	0.2	2	Vin Sunitinib	0.50 0.50	0.86	2	CBL IRT	0.50 0.50	3.12	2.26	p53	2	Sunitinib SAHA	0.50 0.50	0.94	2	Vin Sunitinib	0.50 0.50	0.86	0.08
675	2	0.81	0	0	0	0	0	0	0.19	2	Vin Sunitinib	0.50 0.50	0.86	2	CBL IRT	0.50 0.50	3.14	2.28	p53	2	Sunitinib SAHA	0.50 0.50	0.92	2	Vin Sunitinib	0.50 0.50	0.86	0.06
676	2	0.82	0	0	0	0	0	0	0.18	2	Vin Sunitinib	0.50 0.50	0.86	2	CBL IRT	0.50 0.50	3.18	2.32	p53	2	Sunitinib SAHA	0.50 0.50	0.9	2	Vin Sunitinib	0.50 0.50	0.86	0.04
677	2	0.83	0	0	0	0	0	0	0.17	2	Vin Sunitinib	0.50 0.50	0.86	2	CBL IRT	0.50 0.50	3.2	2.34	p53	2	Sunitinib SAHA	0.50 0.50	0.88	2	Vin Sunitinib	0.50 0.50	0.86	0.02
678	2	0.84	0	0	0	0	0	0	0.16	2	Vin Sunitinib	0.50 0.50	0.86	2	CBL IRT	0.50 0.50	3.22	2.36	p53	2	Sunitinib SAHA	0.50 0.50	0.86	2	Vin Sunitinib	0.50 0.50	0.86	0
679	2	0.85	0	0	0	0	0	0	0.15	2	Sunitinib SAHA	0.50 0.50	0.86	2	CBL IRT	0.50 0.50	3.26	2.4	p53	2	Sunitinib SAHA	0.50 0.50	0.86	2	Sunitinib SAHA	0.50 0.50	0.86	0
680	2	0.86	0	0	0	0	0	0	0.14	2	Sunitinib SAHA	0.50 0.50	0.84	2	CBL IRT	0.50 0.50	3.28	2.44	p53	2	Sunitinib SAHA	0.50 0.50	0.84	2	Sunitinib SAHA	0.50 0.50	0.84	0
681	2	0.87	0	0	0	0	0	0	0.13	2	Sunitinib SAHA	0.50 0.50	0.82	2	CBL IRT	0.50 0.50	3.3	2.48	p53	2	Sunitinib SAHA	0.50 0.50	0.82	2	Sunitinib SAHA	0.50 0.50	0.82	0
682	2	0.88	0	0	0	0	0	0	0.12	2	Sunitinib SAHA	0.50 0.50	0.8	2	CBL IRT	0.50 0.50	3.34	2.54	p53	2	Sunitinib SAHA	0.50 0.50	0.8	2	Sunitinib SAHA	0.50 0.50	0.8	0
683	2	0.89	0	0	0	0	0	0	0.11	2	Sunitinib SAHA	0.50 0.50	0.8	2	CBL IRT	0.50 0.50	3.36	2.56	p53	2	Sunitinib SAHA	0.50 0.50	0.8	2	Sunitinib SAHA	0.50 0.50	0.8	0
684	2	0.9	0	0	0	0	0	0	0.1	2	Sunitinib SAHA	0.50 0.50	0.78	2	CBL IRT	0.50 0.50	3.38	2.6	p53	2	Sunitinib SAHA	0.50 0.50	0.78	2	Sunitinib SAHA	0.50 0.50	0.78	0
685	2	0.91	0	0	0	0	0	0	0.09	2	Sunitinib SAHA	0.50 0.50	0.76	2	CBL IRT	0.50 0.50	3.42	2.66	p53	2	Sunitinib SAHA	0.50 0.50	0.76	2	Sunitinib SAHA	0.50 0.50	0.76	0
686	2	0.92	0	0	0	0	0	0	0.08	2	Sunitinib SAHA	0.50 0.50	0.74	2	CBL IRT	0.50 0.50	3.44	2.7	p53	2	Sunitinib SAHA	0.50 0.50	0.74	2	Sunitinib SAHA	0.50 0.50	0.74	0
687	2	0.93	0	0	0	0	0	0	0.07	2	Sunitinib SAHA	0.50 0.50	0.74	2	CBL IRT	0.50 0.50	3.46	2.72	p53	2	Sunitinib SAHA	0.50 0.50	0.74	2	Sunitinib SAHA	0.50 0.50	0.74	0
688	2	0.94	0	0	0	0	0	0	0.06	2	Sunitinib SAHA	0.50 0.50	0.72	2	CBL IRT	0.50 0.50	3.5	2.78	p53	2	Sunitinib SAHA	0.50 0.50	0.72	2	Sunitinib SAHA	0.50 0.50	0.72	0
689	2	0.95	0	0	0	0	0	0	0.05	2	Sunitinib SAHA	0.50 0.50	0.7	2	CBL IRT	0.50 0.50	3.52	2.82	p53	2	Sunitinib SAHA	0.50 0.50	0.7	2	Sunitinib SAHA	0.50 0.50	0.7	0
690	2	0.96	0	0	0	0	0	0	0.04	2	Sunitinib SAHA	0.50 0.50	0.68	2	CBL IRT	0.50 0.50	3.54	2.86	p53	2	Sunitinib SAHA	0.50 0.50	0.68	2	Sunitinib SAHA	0.50 0.50	0.68	0
691	2	0.97	0	0	0	0	0	0	0.03	2	Sunitinib SAHA	0.50 0.50	0.66	2	CBL IRT	0.50 0.50	3.58	2.92	p53	2	Sunitinib SAHA	0.50 0.50	0.66	2	Sunitinib SAHA	0.50 0.50	0.66	0
692	2	0.98	0	0	0	0	0	0	0.02	2	Sunitinib SAHA	0.50 0.50	0.66	2	CBL IRT	0.50 0.50	3.6	2.94	p53	2	Sunitinib SAHA	0.50 0.50	0.66	2	Sunitinib SAHA	0.50 0.50	0.66	0
693	2	0.99	0	0	0	0	0	0	0.01	2	Sunitinib SAHA	0.50 0.50	0.64	2	CBL IRT	0.50 0.50	3.62	2.98	p53	2	Sunitinib SAHA	0.50 0.50	0.64	2	Sunitinib SAHA	0.50 0.50	0.64	0
694	2	0	0.01	0.99	0	0	0	0	0	2	5FU SAHA	0.50 0.50	-0.56	2	DOX ActD	0.50 0.50	1.12	1.68	atr	2	5FU SAHA	0.50 0.50	-0.56	2	5FU SAHA	0.50 0.50	-0.56	0
695	2	0	0.02	0.98	0	0	0	0	0	2	5FU SAHA	0.50 0.50	-0.56	2	DOX ActD	0.50 0.50	1.14	1.7	atr	2	5FU SAHA	0.50 0.50	-0.56	2	5FU SAHA	0.50 0.50	-0.56	0
696	2	0	0.03	0.97	0	0	0	0	0	2	5FU SAHA	0.50 0.50	-0.54	2	DOX IRT	0.50 0.50	1.14	1.68	atr	2	5FU SAHA	0.50 0.50	-0.54	2	5FU SAHA	0.50 0.50	-0.54	0
697	2	0	0.04	0.96	0	0	0	0	0	2	5FU SAHA	0.50 0.50	-0.52	2	DOX IRT	0.50 0.50	1.16	1.68	atr	2	5FU SAHA	0.50 0.50	-0.52	2	5FU SAHA	0.50 0.50	-0.52	0
698	2	0	0.05	0.95	0	0	0	0	0	2	5FU SAHA	0.50 0.50	-0.52	2	DOX IRT	0.50 0.50	1.18	1.7	atr	2	5FU SAHA	0.50 0.50	-0.52	2	5FU SAHA	0.50 0.50	-0.52	0
699	2	0	0.06	0.94	0	0	0	0	0	2	5FU SAHA	0.50 0.50	-0.5	2	DOX IRT	0.50 0.50	1.2	1.7	atr	2	5FU SAHA	0.50 0.50	-0.5	2	5FU SAHA	0.50 0.50	-0.5	0
700	2	0	0.07	0.93	0	0	0	0	0	2	5FU SAHA	0.50 0.50	-0.5	2	DOX IRT	0.50 0.50	1.22	1.72	atr	2	5FU SAHA	0.50 0.50	-0.5	2	5FU SAHA	0.50 0.50	-0.5	0
701	2	0	0.08	0.92	0	0	0	0	0	2	5FU SAHA	0.50 0.50	-0.48	2	DOX IRT	0.50 0.50	1.24	1.72	atr	2	5FU SAHA	0.50 0.50	-0.48	2	5FU SAHA	0.50 0.50	-0.48	0
702	2	0	0.09	0.91	0	0	0	0	0	2	5FU SAHA	0.50 0.50	-0.46	2	DOX IRT	0.50 0.50	1.26	1.72	atr	2	5FU SAHA	0.50 0.50	-0.46	2	5FU SAHA	0.50 0.50	-0.46	0
703	2	0	0.1	0.9	0	0	0	0	0	2	5FU SAHA	0.50 0.50	-0.46	2	DOX IRT	0.50 0.50	1.3	1.76	atr	2	5FU SAHA	0.50 0.50	-0.46	2	5FU SAHA	0.50 0.50	-0.46	0
704	2	0	0.11	0.89	0	0	0	0	0	2	5FU SAHA	0.50 0.50	-0.44	2	DOX IRT	0.50 0.50	1.32	1.76	atr	2	5FU SAHA	0.50 0.50	-0.44	2	5FU SAHA	0.50 0.50	-0.44	0
705	2	0	0.12	0.88	0	0	0	0	0	2	5FU SAHA	0.50 0.50	-0.42	2	DOX IRT	0.50 0.50	1.34	1.76	atr	2	5FU SAHA	0.50 0.50	-0.42	2	5FU SAHA	0.50 0.50	-0.42	0
706	2	0	0.13	0.87	0	0	0	0	0	2	5FU SAHA	0.50 0.50	-0.42	2	DOX IRT	0.50 0.50	1.36	1.78	atr	2	5FU SAHA	0.50 0.50	-0.42	2	5FU SAHA	0.50 0.50	-0.42	0
707	2	0	0.14	0.86	0	0	0	0	0	2	5FU SAHA	0.50 0.50	-0.4	2	DOX IRT	0.50 0.50	1.38	1.78	atr	2	5FU SAHA	0.50 0.50	-0.4	2	5FU SAHA	0.50 0.50	-0.4	0
708	2	0	0.15	0.85	0	0	0	0	0	2	5FU SAHA	0.50 0.50	-0.38	2	DOX IRT	0.50 0.50	1.4	1.78	atr	2	5FU SAHA	0.50 0.50	-0.38	2	5FU SAHA	0.50 0.50	-0.38	0
709	2	0	0.16	0.84	0	0	0	0	0	2	5FU SAHA	0.50 0.50	-0.38	2	DOX IRT	0.50 0.50	1.42	1.8	atr	2	5FU SAHA	0.50 0.50	-0.38	2	5FU SAHA	0.50 0.50	-0.38	0
710	2	0	0.17	0.83	0	0	0	0	0	2	5FU SAHA	0.50 0.50	-0.36	2	DOX IRT	0.50 0.50	1.44	1.8	atr	2	5FU SAHA	0.50 0.50	-0.36	2	5FU SAHA	0.50 0.50	-0.36	0
711	2	0	0.18	0.82	0	0	0	0	0	2	5FU SAHA	0.50 0.50	-0.36	2	DOX IRT	0.50 0.50	1.46	1.82	atr	2	5FU SAHA	0.50 0.50	-0.36	2	5FU SAHA	0.50 0.50	-0.36	0
712	2	0	0.19	0.81	0	0	0	0	0	2	5FU SAHA	0.50 0.50	-0.34	2	DOX IRT	0.50 0.50	1.48	1.82	atr	2	5FU SAHA	0.50 0.50	-0.34	2	5FU SAHA	0.50 0.50	-0.34	0
713	2	0	0.2	0.8	0	0	0	0	0	2	5FU SAHA	0.50 0.50	-0.32	2	DOX IRT	0.50 0.50	1.5	1.82	atr	2	5FU SAHA	0.50 0.50	-0.32	2	5FU SAHA	0.50 0.50	-0.32	0
714	2	0	0.21	0.79	0	0	0	0	0	2	5FU SAHA	0.50 0.50	-0.32	2	DOX IRT	0.50 0.50	1.52	1.84	atr	2	5FU SAHA	0.50 0.50	-0.32	2	5FU SAHA	0.50 0.50	-0.32	0
715	2	0	0.22	0.78	0	0	0	0	0	2	5FU SAHA	0.50 0.50	-0.3	2	DOX IRT	0.50 0.50	1.54	1.84	atr	2	5FU SAHA	0.50 0.50	-0.3	2	5FU SAHA	0.50 0.50	-0.3	0
716	2	0	0.23	0.77	0	0	0	0	0	2	5FU SAHA	0.50 0.50	-0.28	2	DOX IRT	0.50 0.50	1.56	1.84	atr	2	5FU SAHA	0.50 0.50	-0.28	2	5FU SAHA	0.50 0.50	-0.28	0
717	2	0	0.24	0.76	0	0	0	0	0	2	5FU SAHA	0.50 0.50	-0.28	2	DOX IRT	0.50 0.50	1.58	1.86	atr	2	5FU SAHA	0.50 0.50	-0.28	2	5FU SAHA	0.50 0.50	-0.28	0
718	2	0	0.25	0.75	0	0	0	0	0	2	5FU SAHA	0.50 0.50	-0.26	2	DOX IRT	0.50 0.50	1.6	1.86	atr	2	5FU SAHA	0.50 0.50	-0.26	2	5FU SAHA	0.50 0.50	-0.26	0
719	2	0	0.26	0.74	0	0	0	0	0	2	5FU SAHA	0.50 0.50	-0.24	2	DOX IRT	0.50 0.50	1.62	1.86	atr	2	5FU SAHA	0.50 0.50	-0.24	2	5FU SAHA	0.50 0.50	-0.24	0
720	2	0	0.27	0.73	0	0	0	0	0	2	5FU SAHA	0.50 0.50	-0.24	2	DOX IRT	0.50 0.50	1.64	1.88	atr	2	5FU SAHA	0.50 0.50	-0.24	2	5FU SAHA	0.50 0.50	-0.24	0
721	2	0	0.28	0.72	0	0	0	0	0	2	5FU SAHA	0.50 0.50	-0.22	2	DOX IRT	0.50 0.50	1.66	1.88	atr	2	5FU SAHA	0.50 0.50	-0.22	2	5FU SAHA	0.50 0.50	-0.22	0
722	2	0	0.29	0.71	0	0	0	0	0	2	5FU SAHA	0.50 0.50	-0.22	2	DOX IRT	0.50 0.50	1.68	1.9	atr	2	5FU SAHA	0.50 0.50	-0.22	2	5FU SAHA	0.50 0.50	-0.22	0
723	2	0	0.3	0.7	0	0	0	0	0	2	5FU SAHA	0.50 0.50	-0.2	2	DOX IRT	0.50 0.50	1.7	1.9	atr	2	5FU SAHA	0.50 0.50	-0.2	2	5FU SAHA	0.50 0.50	-0.2	0
724	2	0	0.31	0.69	0	0	0	0	0	2	5FU SAHA	0.50 0.50	-0.18	2	DOX IRT	0.50 0.50	1.72	1.9	atr	2	5FU SAHA	0.50 0.50	-0.18	2	5FU SAHA	0.50 0.50	-0.18	0
725	2	0	0.32	0.68	0	0	0	0	0	2	5FU SAHA	0.50 0.50	-0.18	2	DOX IRT	0.50 0.50	1.74	1.92	atr	2	5FU SAHA	0.50 0.50	-0.18	2	5FU SAHA	0.50 0.50	-0.18	0
726	2	0	0.33	0.67	0	0	0	0	0	2	5FU SAHA	0.50 0.50	-0.16	2	DOX IRT	0.50 0.50	1.76	1.92	atr	2	5FU SAHA	0.50 0.50	-0.16	2	5FU SAHA	0.50 0.50	-0.16	0
727	2	0	0.34	0.66	0	0	0	0	0	2	5FU SAHA	0.50 0.50	-0.14	2	DOX IRT	0.50 0.50	1.78	1.92	atr	2	5FU SAHA	0.50 0.50	-0.14	2	5FU SAHA	0.50 0.50	-0.14	0
728	2	0	0.35	0.65	0	0	0	0	0	2	5FU SAHA	0.50 0.50	-0.14	2	DOX IRT	0.50 0.50	1.8	1.94	atr	2	5FU SAHA	0.50 0.50	-0.14	2	5FU SAHA	0.50 0.50	-0.14	0
729	2	0	0.36	0.64	0	0	0	0	0	2	5FU SAHA	0.50 0.50	-0.12	2	DOX IRT	0.50 0.50	1.82	1.94	atr	2	5FU SAHA	0.50 0.50	-0.12	2	5FU SAHA	0.50 0.50	-0.12	0
730	2	0	0.37	0.63	0	0	0	0	0	2	5FU SAHA	0.50 0.50	-0.1	2	DOX IRT	0.50 0.50	1.84	1.94	atr	2	5FU SAHA	0.50 0.50	-0.1	2	5FU SAHA	0.50 0.50	-0.1	0
731	2	0	0.38	0.62	0	0	0	0	0	2	5FU SAHA	0.50 0.50	-0.1	2	DOX IRT	0.50 0.50	1.88	1.98	atr	2	5FU SAHA	0.50 0.50	-0.1	2	5FU SAHA	0.50 0.50	-0.1	0
732	2	0	0.39	0.61	0	0	0	0	0	2	5FU SAHA	0.50 0.50	-0.08	2	DOX IRT	0.50 0.50	1.9	1.98	atr	2	5FU SAHA	0.50 0.50	-0.08	2	5FU SAHA	0.50 0.50	-0.08	0
733	2	0	0.4	0.6	0	0	0	0	0	2	5FU SAHA	0.50 0.50	-0.08	2	DOX IRT	0.50 0.50	1.92	2	atr	2	5FU SAHA	0.50 0.50	-0.08	2	5FU SAHA	0.50 0.50	-0.08	0
734	2	0	0.41	0.59	0	0	0	0	0	2	5FU SAHA	0.50 0.50	-0.06	2	DOX IRT	0.50 0.50	1.94	2	atr	2	5FU SAHA	0.50 0.50	-0.06	2	5FU SAHA	0.50 0.50	-0.06	0
735	2	0	0.42	0.58	0	0	0	0	0	2	5FU SAHA	0.50 0.50	-0.04	2	DOX IRT	0.50 0.50	1.96	2	atr	2	5FU SAHA	0.50 0.50	-0.04	2	5FU SAHA	0.50 0.50	-0.04	0
736	2	0	0.43	0.57	0	0	0	0	0	2	5FU SAHA	0.50 0.50	-0.04	2	DOX IRT	0.50 0.50	1.98	2.02	atr	2	5FU SAHA	0.50 0.50	-0.04	2	5FU SAHA	0.50 0.50	-0.04	0
737	2	0	0.44	0.56	0	0	0	0	0	2	5FU SAHA	0.50 0.50	-0.02	2	DOX IRT	0.50 0.50	2	2.02	atr	2	5FU SAHA	0.50 0.50	-0.02	2	5FU SAHA	0.50 0.50	-0.02	0
738	2	0	0.45	0.55	0	0	0	0	0	2	5FU SAHA	0.50 0.50	0	2	DOX IRT	0.50 0.50	2.02	2.02	atr	2	5FU SAHA	0.50 0.50	0	2	5FU SAHA	0.50 0.50	0	0
739	2	0	0.46	0.54	0	0	0	0	0	2	5FU SAHA	0.50 0.50	0	2	DOX IRT	0.50 0.50	2.04	2.04	atr	2	5FU SAHA	0.50 0.50	0	2	5FU SAHA	0.50 0.50	0	0
740	2	0	0.47	0.53	0	0	0	0	0	2	5FU SAHA	0.50 0.50	0.02	2	DOX IRT	0.50 0.50	2.06	2.04	atr	2	5FU SAHA	0.50 0.50	0.02	2	5FU SAHA	0.50 0.50	0.02	0
741	2	0	0.48	0.52	0	0	0	0	0	2	5FU SAHA	0.50 0.50	0.02	2	DOX IRT	0.50 0.50	2.08	2.06	atr	2	5FU SAHA	0.50 0.50	0.02	2	5FU SAHA	0.50 0.50	0.02	0
742	2	0	0.49	0.51	0	0	0	0	0	2	5FU SAHA	0.50 0.50	0.04	2	DOX IRT	0.50 0.50	2.1	2.06	atr	2	5FU SAHA	0.50 0.50	0.04	2	5FU SAHA	0.50 0.50	0.04	0
743	2	0	0.5	0.5	0	0	0	0	0	2	5FU SAHA	0.50 0.50	0.06	2	DOX IRT	0.50 0.50	2.12	2.06	atr	2	5FU SAHA	0.50 0.50	0.06	2	5FU SAHA	0.50 0.50	0.06	0
744	2	0	0.51	0.49	0	0	0	0	0	2	5FU SAHA	0.50 0.50	0.06	2	DOX IRT	0.50 0.50	2.14	2.08	chk2	2	ActD Erlotinib	0.50 0.50	0.34	2	5FU SAHA	0.50 0.50	0.06	0.28
745	2	0	0.52	0.48	0	0	0	0	0	2	5FU SAHA	0.50 0.50	0.08	2	DOX IRT	0.50 0.50	2.16	2.08	chk2	2	ActD Erlotinib	0.50 0.50	0.32	2	5FU SAHA	0.50 0.50	0.08	0.24
746	2	0	0.53	0.47	0	0	0	0	0	2	5FU SAHA	0.50 0.50	0.1	2	DOX IRT	0.50 0.50	2.18	2.08	chk2	2	ActD Erlotinib	0.50 0.50	0.32	2	5FU SAHA	0.50 0.50	0.1	0.22
747	2	0	0.54	0.46	0	0	0	0	0	2	5FU SAHA	0.50 0.50	0.1	2	DOX IRT	0.50 0.50	2.2	2.1	chk2	2	ActD Erlotinib	0.50 0.50	0.32	2	5FU SAHA	0.50 0.50	0.1	0.22
748	2	0	0.55	0.45	0	0	0	0	0	2	5FU SAHA	0.50 0.50	0.12	2	DOX IRT	0.50 0.50	2.22	2.1	chk2	2	ActD Erlotinib	0.50 0.50	0.3	2	5FU SAHA	0.50 0.50	0.12	0.18
749	2	0	0.56	0.44	0	0	0	0	0	2	Erlotinib SAHA	0.50 0.50	0.12	2	DOX IRT	0.50 0.50	2.24	2.12	chk2	2	ActD Erlotinib	0.50 0.50	0.3	2	Erlotinib SAHA	0.50 0.50	0.12	0.18
750	2	0	0.57	0.43	0	0	0	0	0	2	Erlotinib SAHA	0.50 0.50	0.12	2	DOX IRT	0.50 0.50	2.26	2.14	chk2	2	ActD Erlotinib	0.50 0.50	0.3	2	Erlotinib SAHA	0.50 0.50	0.12	0.18
751	2	0	0.58	0.42	0	0	0	0	0	2	Erlotinib SAHA	0.50 0.50	0.12	2	DOX IRT	0.50 0.50	2.28	2.16	chk2	2	ActD Erlotinib	0.50 0.50	0.28	2	Erlotinib SAHA	0.50 0.50	0.12	0.16
752	2	0	0.59	0.41	0	0	0	0	0	2	Erlotinib SAHA	0.50 0.50	0.12	2	DOX IRT	0.50 0.50	2.3	2.18	chk2	2	ActD Erlotinib	0.50 0.50	0.28	2	Erlotinib SAHA	0.50 0.50	0.12	0.16
753	2	0	0.6	0.4	0	0	0	0	0	2	Erlotinib SAHA	0.50 0.50	0.12	2	DOX IRT	0.50 0.50	2.32	2.2	chk2	2	ActD Erlotinib	0.50 0.50	0.28	2	Erlotinib SAHA	0.50 0.50	0.12	0.16
754	2	0	0.61	0.39	0	0	0	0	0	2	Erlotinib SAHA	0.50 0.50	0.14	2	DOX IRT	0.50 0.50	2.34	2.2	chk2	2	ActD Erlotinib	0.50 0.50	0.26	2	Erlotinib SAHA	0.50 0.50	0.14	0.12
755	2	0	0.62	0.38	0	0	0	0	0	2	Erlotinib SAHA	0.50 0.50	0.14	2	DOX IRT	0.50 0.50	2.36	2.22	chk2	2	ActD Erlotinib	0.50 0.50	0.26	2	Erlotinib SAHA	0.50 0.50	0.14	0.12
756	2	0	0.63	0.37	0	0	0	0	0	2	Erlotinib SAHA	0.50 0.50	0.14	2	DOX IRT	0.50 0.50	2.38	2.24	chk2	2	ActD Erlotinib	0.50 0.50	0.26	2	Erlotinib SAHA	0.50 0.50	0.14	0.12
757	2	0	0.64	0.36	0	0	0	0	0	2	Erlotinib SAHA	0.50 0.50	0.14	2	DOX IRT	0.50 0.50	2.4	2.26	chk2	2	ActD Erlotinib	0.50 0.50	0.24	2	Erlotinib SAHA	0.50 0.50	0.14	0.1
758	2	0	0.65	0.35	0	0	0	0	0	2	Erlotinib SAHA	0.50 0.50	0.14	2	DOX IRT	0.50 0.50	2.42	2.28	chk2	2	ActD Erlotinib	0.50 0.50	0.24	2	Erlotinib SAHA	0.50 0.50	0.14	0.1
759	2	0	0.66	0.34	0	0	0	0	0	2	Erlotinib SAHA	0.50 0.50	0.14	2	DOX IRT	0.50 0.50	2.46	2.32	chk2	2	ActD Erlotinib	0.50 0.50	0.24	2	Erlotinib SAHA	0.50 0.50	0.14	0.1
760	2	0	0.67	0.33	0	0	0	0	0	2	Erlotinib SAHA	0.50 0.50	0.14	2	DOX IRT	0.50 0.50	2.48	2.34	chk2	2	ActD Erlotinib	0.50 0.50	0.22	2	Erlotinib SAHA	0.50 0.50	0.14	0.08
761	2	0	0.68	0.32	0	0	0	0	0	2	Erlotinib SAHA	0.50 0.50	0.14	2	CBL IRT	0.50 0.50	2.5	2.36	chk2	2	ActD Erlotinib	0.50 0.50	0.22	2	Erlotinib SAHA	0.50 0.50	0.14	0.08
762	2	0	0.69	0.31	0	0	0	0	0	2	Erlotinib SAHA	0.50 0.50	0.14	2	CBL IRT	0.50 0.50	2.52	2.38	chk2	2	ActD Erlotinib	0.50 0.50	0.22	2	Erlotinib SAHA	0.50 0.50	0.14	0.08
763	2	0	0.7	0.3	0	0	0	0	0	2	Erlotinib SAHA	0.50 0.50	0.14	2	CBL IRT	0.50 0.50	2.56	2.42	chk2	2	ActD Erlotinib	0.50 0.50	0.2	2	Erlotinib SAHA	0.50 0.50	0.14	0.06
764	2	0	0.71	0.29	0	0	0	0	0	2	Erlotinib SAHA	0.50 0.50	0.14	2	CBL IRT	0.50 0.50	2.58	2.44	chk2	2	ActD Erlotinib	0.50 0.50	0.2	2	Erlotinib SAHA	0.50 0.50	0.14	0.06
765	2	0	0.72	0.28	0	0	0	0	0	2	Erlotinib SAHA	0.50 0.50	0.14	2	CBL IRT	0.50 0.50	2.62	2.48	chk2	2	ActD Erlotinib	0.50 0.50	0.2	2	Erlotinib SAHA	0.50 0.50	0.14	0.06
766	2	0	0.73	0.27	0	0	0	0	0	2	Erlotinib SAHA	0.50 0.50	0.14	2	CBL IRT	0.50 0.50	2.64	2.5	chk2	2	ActD Erlotinib	0.50 0.50	0.18	2	Erlotinib SAHA	0.50 0.50	0.14	0.04
767	2	0	0.74	0.26	0	0	0	0	0	2	Erlotinib SAHA	0.50 0.50	0.14	2	CBL IRT	0.50 0.50	2.68	2.54	chk2	2	ActD Erlotinib	0.50 0.50	0.18	2	Erlotinib SAHA	0.50 0.50	0.14	0.04
768	2	0	0.75	0.25	0	0	0	0	0	2	Erlotinib SAHA	0.50 0.50	0.14	2	CBL IRT	0.50 0.50	2.72	2.58	chk2	2	ActD Erlotinib	0.50 0.50	0.18	2	Erlotinib SAHA	0.50 0.50	0.14	0.04
769	2	0	0.76	0.24	0	0	0	0	0	2	Erlotinib SAHA	0.50 0.50	0.14	2	CBL IRT	0.50 0.50	2.74	2.6	chk2	2	ActD Erlotinib	0.50 0.50	0.16	2	Erlotinib SAHA	0.50 0.50	0.14	0.02
770	2	0	0.77	0.23	0	0	0	0	0	2	Erlotinib SAHA	0.50 0.50	0.14	2	CBL IRT	0.50 0.50	2.78	2.64	chk2	2	ActD Erlotinib	0.50 0.50	0.16	2	Erlotinib SAHA	0.50 0.50	0.14	0.02
771	2	0	0.78	0.22	0	0	0	0	0	2	Erlotinib SAHA	0.50 0.50	0.16	2	CBL IRT	0.50 0.50	2.8	2.64	chk2	2	ActD Erlotinib	0.50 0.50	0.16	2	Erlotinib SAHA	0.50 0.50	0.16	0
772	2	0	0.79	0.21	0	0	0	0	0	2	ActD Erlotinib	0.50 0.50	0.14	2	CBL IRT	0.50 0.50	2.84	2.7	chk2	2	ActD Erlotinib	0.50 0.50	0.14	2	ActD Erlotinib	0.50 0.50	0.14	0
773	2	0	0.8	0.2	0	0	0	0	0	2	ActD Erlotinib	0.50 0.50	0.14	2	CBL IRT	0.50 0.50	2.86	2.72	chk2	2	ActD Erlotinib	0.50 0.50	0.14	2	ActD Erlotinib	0.50 0.50	0.14	0
774	2	0	0.81	0.19	0	0	0	0	0	2	ActD Erlotinib	0.50 0.50	0.14	2	CBL IRT	0.50 0.50	2.9	2.76	chk2	2	ActD Erlotinib	0.50 0.50	0.14	2	ActD Erlotinib	0.50 0.50	0.14	0
775	2	0	0.82	0.18	0	0	0	0	0	2	ActD Erlotinib	0.50 0.50	0.12	2	CBL IRT	0.50 0.50	2.92	2.8	chk2	2	ActD Erlotinib	0.50 0.50	0.12	2	ActD Erlotinib	0.50 0.50	0.12	0
776	2	0	0.83	0.17	0	0	0	0	0	2	ActD Erlotinib	0.50 0.50	0.12	2	CBL IRT	0.50 0.50	2.96	2.84	chk2	2	ActD Erlotinib	0.50 0.50	0.12	2	ActD Erlotinib	0.50 0.50	0.12	0
777	2	0	0.84	0.16	0	0	0	0	0	2	ActD Erlotinib	0.50 0.50	0.12	2	CBL IRT	0.50 0.50	2.98	2.86	chk2	2	ActD Erlotinib	0.50 0.50	0.12	2	ActD Erlotinib	0.50 0.50	0.12	0
778	2	0	0.85	0.15	0	0	0	0	0	2	ActD Erlotinib	0.50 0.50	0.1	2	CBL IRT	0.50 0.50	3.02	2.92	chk2	2	ActD Erlotinib	0.50 0.50	0.1	2	ActD Erlotinib	0.50 0.50	0.1	0
779	2	0	0.86	0.14	0	0	0	0	0	2	ActD Erlotinib	0.50 0.50	0.1	2	CBL IRT	0.50 0.50	3.04	2.94	chk2	2	ActD Erlotinib	0.50 0.50	0.1	2	ActD Erlotinib	0.50 0.50	0.1	0
780	2	0	0.87	0.13	0	0	0	0	0	2	ActD Erlotinib	0.50 0.50	0.1	2	CBL IRT	0.50 0.50	3.08	2.98	chk2	2	ActD Erlotinib	0.50 0.50	0.1	2	ActD Erlotinib	0.50 0.50	0.1	0
781	2	0	0.88	0.12	0	0	0	0	0	2	ActD Erlotinib	0.50 0.50	0.08	2	CBL IRT	0.50 0.50	3.1	3.02	chk2	2	ActD Erlotinib	0.50 0.50	0.08	2	ActD Erlotinib	0.50 0.50	0.08	0
782	2	0	0.89	0.11	0	0	0	0	0	2	ActD Erlotinib	0.50 0.50	0.08	2	CBL IRT	0.50 0.50	3.14	3.06	chk2	2	ActD Erlotinib	0.50 0.50	0.08	2	ActD Erlotinib	0.50 0.50	0.08	0
783	2	0	0.9	0.1	0	0	0	0	0	2	ActD Erlotinib	0.50 0.50	0.08	2	CBL IRT	0.50 0.50	3.16	3.08	chk2	2	ActD Erlotinib	0.50 0.50	0.08	2	ActD Erlotinib	0.50 0.50	0.08	0
784	2	0	0.91	0.09	0	0	0	0	0	2	ActD Erlotinib	0.50 0.50	0.06	2	CBL IRT	0.50 0.50	3.2	3.14	chk2	2	ActD Erlotinib	0.50 0.50	0.06	2	ActD Erlotinib	0.50 0.50	0.06	0
785	2	0	0.92	0.08	0	0	0	0	0	2	ActD Erlotinib	0.50 0.50	0.06	2	CBL IRT	0.50 0.50	3.22	3.16	chk2	2	ActD Erlotinib	0.50 0.50	0.06	2	ActD Erlotinib	0.50 0.50	0.06	0
786	2	0	0.93	0.07	0	0	0	0	0	2	ActD Erlotinib	0.50 0.50	0.06	2	CBL IRT	0.50 0.50	3.26	3.2	chk2	2	ActD Erlotinib	0.50 0.50	0.06	2	ActD Erlotinib	0.50 0.50	0.06	0
787	2	0	0.94	0.06	0	0	0	0	0	2	ActD Erlotinib	0.50 0.50	0.04	2	CBL IRT	0.50 0.50	3.3	3.26	chk2	2	ActD Erlotinib	0.50 0.50	0.04	2	ActD Erlotinib	0.50 0.50	0.04	0
788	2	0	0.95	0.05	0	0	0	0	0	2	ActD Erlotinib	0.50 0.50	0.04	2	CBL IRT	0.50 0.50	3.32	3.28	chk2	2	ActD Erlotinib	0.50 0.50	0.04	2	ActD Erlotinib	0.50 0.50	0.04	0
789	2	0	0.96	0.04	0	0	0	0	0	2	ActD Erlotinib	0.50 0.50	0.04	2	CBL IRT	0.50 0.50	3.36	3.32	chk2	2	ActD Erlotinib	0.50 0.50	0.04	2	ActD Erlotinib	0.50 0.50	0.04	0
790	2	0	0.97	0.03	0	0	0	0	0	2	ActD Erlotinib	0.50 0.50	0.02	2	CBL IRT	0.50 0.50	3.38	3.36	chk2	2	ActD Erlotinib	0.50 0.50	0.02	2	ActD Erlotinib	0.50 0.50	0.02	0
791	2	0	0.98	0.02	0	0	0	0	0	2	ActD Erlotinib	0.50 0.50	0.02	2	CBL IRT	0.50 0.50	3.42	3.4	chk2	2	ActD Erlotinib	0.50 0.50	0.02	2	ActD Erlotinib	0.50 0.50	0.02	0
792	2	0	0.99	0.01	0	0	0	0	0	2	ActD Erlotinib	0.50 0.50	0.02	2	CBL IRT	0.50 0.50	3.44	3.42	chk2	2	ActD Erlotinib	0.50 0.50	0.02	2	ActD Erlotinib	0.50 0.50	0.02	0
793	2	0	0.01	0	0.99	0	0	0	0	2	CBL 5FU	0.50 0.50	-1.64	2	DOX Sunitinib	0.50 0.50	-0.02	1.62	chk1	2	CBL 5FU	0.50 0.50	-1.64	2	CBL 5FU	0.50 0.50	-1.64	0
794	2	0	0.02	0	0.98	0	0	0	0	2	CBL 5FU	0.50 0.50	-1.6	2	DOX Sunitinib	0.50 0.50	0	1.6	chk1	2	CBL 5FU	0.50 0.50	-1.6	2	CBL 5FU	0.50 0.50	-1.6	0
795	2	0	0.03	0	0.97	0	0	0	0	2	CBL 5FU	0.50 0.50	-1.56	2	DOX Sunitinib	0.50 0.50	0.04	1.6	chk1	2	CBL 5FU	0.50 0.50	-1.56	2	CBL 5FU	0.50 0.50	-1.56	0
796	2	0	0.04	0	0.96	0	0	0	0	2	CBL 5FU	0.50 0.50	-1.52	2	DOX Sunitinib	0.50 0.50	0.06	1.58	chk1	2	CBL 5FU	0.50 0.50	-1.52	2	CBL 5FU	0.50 0.50	-1.52	0
797	2	0	0.05	0	0.95	0	0	0	0	2	CBL 5FU	0.50 0.50	-1.48	2	DOX Sunitinib	0.50 0.50	0.08	1.56	chk1	2	CBL 5FU	0.50 0.50	-1.48	2	CBL 5FU	0.50 0.50	-1.48	0
798	2	0	0.06	0	0.94	0	0	0	0	2	CBL 5FU	0.50 0.50	-1.44	2	DOX Sunitinib	0.50 0.50	0.1	1.54	chk1	2	CBL 5FU	0.50 0.50	-1.44	2	CBL 5FU	0.50 0.50	-1.44	0
799	2	0	0.07	0	0.93	0	0	0	0	2	CBL 5FU	0.50 0.50	-1.4	2	DOX Sunitinib	0.50 0.50	0.12	1.52	chk1	2	CBL 5FU	0.50 0.50	-1.4	2	CBL 5FU	0.50 0.50	-1.4	0
800	2	0	0.08	0	0.92	0	0	0	0	2	CBL 5FU	0.50 0.50	-1.36	2	DOX Sunitinib	0.50 0.50	0.14	1.5	chk1	2	CBL 5FU	0.50 0.50	-1.36	2	CBL 5FU	0.50 0.50	-1.36	0
801	2	0	0.09	0	0.91	0	0	0	0	2	CBL 5FU	0.50 0.50	-1.32	2	DOX Sunitinib	0.50 0.50	0.16	1.48	chk1	2	CBL 5FU	0.50 0.50	-1.32	2	CBL 5FU	0.50 0.50	-1.32	0
802	2	0	0.1	0	0.9	0	0	0	0	2	5FU Erlotinib	0.50 0.50	-1.28	2	DOX Sunitinib	0.50 0.50	0.18	1.46	chk1	2	CBL 5FU	0.50 0.50	-1.28	2	5FU Erlotinib	0.50 0.50	-1.28	0
803	2	0	0.11	0	0.89	0	0	0	0	2	5FU Erlotinib	0.50 0.50	-1.26	2	DOX Sunitinib	0.50 0.50	0.22	1.48	chk1	2	CBL 5FU	0.50 0.50	-1.24	2	5FU Erlotinib	0.50 0.50	-1.26	0.02
804	2	0	0.12	0	0.88	0	0	0	0	2	5FU Erlotinib	0.50 0.50	-1.24	2	DOX Sunitinib	0.50 0.50	0.24	1.48	chk1	2	CBL 5FU	0.50 0.50	-1.2	2	5FU Erlotinib	0.50 0.50	-1.24	0.04
805	2	0	0.13	0	0.87	0	0	0	0	2	5FU Erlotinib	0.50 0.50	-1.22	2	DOX Sunitinib	0.50 0.50	0.26	1.48	chk1	2	CBL 5FU	0.50 0.50	-1.16	2	5FU Erlotinib	0.50 0.50	-1.22	0.06
806	2	0	0.14	0	0.86	0	0	0	0	2	5FU Erlotinib	0.50 0.50	-1.2	2	DOX Sunitinib	0.50 0.50	0.28	1.48	chk1	2	CBL 5FU	0.50 0.50	-1.12	2	5FU Erlotinib	0.50 0.50	-1.2	0.08
807	2	0	0.15	0	0.85	0	0	0	0	2	5FU Erlotinib	0.50 0.50	-1.18	2	DOX Sunitinib	0.50 0.50	0.3	1.48	chk1	2	CBL 5FU	0.50 0.50	-1.08	2	5FU Erlotinib	0.50 0.50	-1.18	0.1
808	2	0	0.16	0	0.84	0	0	0	0	2	5FU Erlotinib	0.50 0.50	-1.16	2	DOX Sunitinib	0.50 0.50	0.32	1.48	chk1	2	CBL 5FU	0.50 0.50	-1.04	2	5FU Erlotinib	0.50 0.50	-1.16	0.12
809	2	0	0.17	0	0.83	0	0	0	0	2	5FU Erlotinib	0.50 0.50	-1.14	2	DOX Sunitinib	0.50 0.50	0.34	1.48	chk1	2	CBL 5FU	0.50 0.50	-1	2	5FU Erlotinib	0.50 0.50	-1.14	0.14
810	2	0	0.18	0	0.82	0	0	0	0	2	5FU Erlotinib	0.50 0.50	-1.12	2	DOX Sunitinib	0.50 0.50	0.36	1.48	chk1	2	CBL 5FU	0.50 0.50	-0.96	2	5FU Erlotinib	0.50 0.50	-1.12	0.16
811	2	0	0.19	0	0.81	0	0	0	0	2	5FU Erlotinib	0.50 0.50	-1.1	2	DOX Sunitinib	0.50 0.50	0.4	1.5	chk1	2	CBL 5FU	0.50 0.50	-0.92	2	5FU Erlotinib	0.50 0.50	-1.1	0.18
812	2	0	0.2	0	0.8	0	0	0	0	2	5FU Erlotinib	0.50 0.50	-1.08	2	DOX Sunitinib	0.50 0.50	0.42	1.5	chk1	2	CBL 5FU	0.50 0.50	-0.88	2	5FU Erlotinib	0.50 0.50	-1.08	0.2
813	2	0	0.21	0	0.79	0	0	0	0	2	5FU Erlotinib	0.50 0.50	-1.06	2	DOX Sunitinib	0.50 0.50	0.44	1.5	chk1	2	CBL 5FU	0.50 0.50	-0.84	2	5FU Erlotinib	0.50 0.50	-1.06	0.22
814	2	0	0.22	0	0.78	0	0	0	0	2	5FU Erlotinib	0.50 0.50	-1.04	2	DOX Sunitinib	0.50 0.50	0.46	1.5	chk1	2	CBL 5FU	0.50 0.50	-0.8	2	5FU Erlotinib	0.50 0.50	-1.04	0.24
815	2	0	0.23	0	0.77	0	0	0	0	2	5FU Erlotinib	0.50 0.50	-1.02	2	DOX Sunitinib	0.50 0.50	0.48	1.5	chk1	2	CBL 5FU	0.50 0.50	-0.76	2	5FU Erlotinib	0.50 0.50	-1.02	0.26
816	2	0	0.24	0	0.76	0	0	0	0	2	5FU Erlotinib	0.50 0.50	-1	2	DOX Sunitinib	0.50 0.50	0.5	1.5	chk1	2	CBL 5FU	0.50 0.50	-0.72	2	5FU Erlotinib	0.50 0.50	-1	0.28
817	2	0	0.25	0	0.75	0	0	0	0	2	5FU Erlotinib	0.50 0.50	-0.98	2	DOX Sunitinib	0.50 0.50	0.52	1.5	chk1	2	CBL 5FU	0.50 0.50	-0.68	2	5FU Erlotinib	0.50 0.50	-0.98	0.3
818	2	0	0.26	0	0.74	0	0	0	0	2	5FU Erlotinib	0.50 0.50	-0.96	2	DOX Sunitinib	0.50 0.50	0.54	1.5	chk1	2	CBL 5FU	0.50 0.50	-0.64	2	5FU Erlotinib	0.50 0.50	-0.96	0.32
819	2	0	0.27	0	0.73	0	0	0	0	2	5FU Erlotinib	0.50 0.50	-0.94	2	DOX Sunitinib	0.50 0.50	0.58	1.52	chk1	2	CBL 5FU	0.50 0.50	-0.6	2	5FU Erlotinib	0.50 0.50	-0.94	0.34
820	2	0	0.28	0	0.72	0	0	0	0	2	5FU Erlotinib	0.50 0.50	-0.92	2	DOX Sunitinib	0.50 0.50	0.6	1.52	chk1	2	CBL 5FU	0.50 0.50	-0.56	2	5FU Erlotinib	0.50 0.50	-0.92	0.36
821	2	0	0.29	0	0.71	0	0	0	0	2	5FU Erlotinib	0.50 0.50	-0.9	2	DOX Sunitinib	0.50 0.50	0.62	1.52	chk1	2	CBL 5FU	0.50 0.50	-0.52	2	5FU Erlotinib	0.50 0.50	-0.9	0.38
822	2	0	0.3	0	0.7	0	0	0	0	2	5FU Erlotinib	0.50 0.50	-0.88	2	DOX Sunitinib	0.50 0.50	0.64	1.52	chk1	2	CBL 5FU	0.50 0.50	-0.48	2	5FU Erlotinib	0.50 0.50	-0.88	0.4
823	2	0	0.31	0	0.69	0	0	0	0	2	5FU Erlotinib	0.50 0.50	-0.86	2	DOX Sunitinib	0.50 0.50	0.66	1.52	chk1	2	CBL 5FU	0.50 0.50	-0.44	2	5FU Erlotinib	0.50 0.50	-0.86	0.42
824	2	0	0.32	0	0.68	0	0	0	0	2	5FU Erlotinib	0.50 0.50	-0.84	2	DOX Sunitinib	0.50 0.50	0.68	1.52	chk1	2	CBL 5FU	0.50 0.50	-0.4	2	5FU Erlotinib	0.50 0.50	-0.84	0.44
825	2	0	0.33	0	0.67	0	0	0	0	2	5FU Erlotinib	0.50 0.50	-0.82	2	DOX Sunitinib	0.50 0.50	0.7	1.52	chk1	2	CBL 5FU	0.50 0.50	-0.36	2	5FU Erlotinib	0.50 0.50	-0.82	0.46
826	2	0	0.34	0	0.66	0	0	0	0	2	5FU Erlotinib	0.50 0.50	-0.8	2	DOX Sunitinib	0.50 0.50	0.72	1.52	chk1	2	CBL 5FU	0.50 0.50	-0.32	2	5FU Erlotinib	0.50 0.50	-0.8	0.48
827	2	0	0.35	0	0.65	0	0	0	0	2	5FU Erlotinib	0.50 0.50	-0.78	2	DOX Sunitinib	0.50 0.50	0.76	1.54	chk1	2	CBL 5FU	0.50 0.50	-0.28	2	5FU Erlotinib	0.50 0.50	-0.78	0.5
828	2	0	0.36	0	0.64	0	0	0	0	2	5FU Erlotinib	0.50 0.50	-0.76	2	DOX Sunitinib	0.50 0.50	0.78	1.54	chk1	2	CBL 5FU	0.50 0.50	-0.24	2	5FU Erlotinib	0.50 0.50	-0.76	0.52
829	2	0	0.37	0	0.63	0	0	0	0	2	5FU Erlotinib	0.50 0.50	-0.74	2	DOX Sunitinib	0.50 0.50	0.8	1.54	chk1	2	CBL 5FU	0.50 0.50	-0.2	2	5FU Erlotinib	0.50 0.50	-0.74	0.54
830	2	0	0.38	0	0.62	0	0	0	0	2	5FU Erlotinib	0.50 0.50	-0.72	2	DOX Sunitinib	0.50 0.50	0.82	1.54	chk1	2	CBL 5FU	0.50 0.50	-0.16	2	5FU Erlotinib	0.50 0.50	-0.72	0.56
831	2	0	0.39	0	0.61	0	0	0	0	2	5FU Erlotinib	0.50 0.50	-0.7	2	DOX IRT	0.50 0.50	0.86	1.56	chk1	2	CBL 5FU	0.50 0.50	-0.12	2	5FU Erlotinib	0.50 0.50	-0.7	0.58
832	2	0	0.4	0	0.6	0	0	0	0	2	5FU Erlotinib	0.50 0.50	-0.68	2	DOX IRT	0.50 0.50	0.9	1.58	chk1	2	CBL 5FU	0.50 0.50	-0.08	2	5FU Erlotinib	0.50 0.50	-0.68	0.6
833	2	0	0.41	0	0.59	0	0	0	0	2	5FU Erlotinib	0.50 0.50	-0.66	2	DOX CBL	0.50 0.50	0.92	1.58	chk1	2	CBL 5FU	0.50 0.50	-0.04	2	5FU Erlotinib	0.50 0.50	-0.66	0.62
834	2	0	0.42	0	0.58	0	0	0	0	2	5FU Erlotinib	0.50 0.50	-0.64	2	DOX CBL	0.50 0.50	0.96	1.6	chk1	2	CBL 5FU	0.50 0.50	0	2	5FU Erlotinib	0.50 0.50	-0.64	0.64
835	2	0	0.43	0	0.57	0	0	0	0	2	5FU Erlotinib	0.50 0.50	-0.62	2	DOX CBL	0.50 0.50	1	1.62	chk1	2	CBL 5FU	0.50 0.50	0.04	2	5FU Erlotinib	0.50 0.50	-0.62	0.66
836	2	0	0.44	0	0.56	0	0	0	0	2	5FU Erlotinib	0.50 0.50	-0.6	2	DOX CBL	0.50 0.50	1.04	1.64	chk1	2	CBL 5FU	0.50 0.50	0.08	2	5FU Erlotinib	0.50 0.50	-0.6	0.68
837	2	0	0.45	0	0.55	0	0	0	0	2	5FU Erlotinib	0.50 0.50	-0.58	2	DOX CBL	0.50 0.50	1.08	1.66	chk1	2	CBL 5FU	0.50 0.50	0.12	2	5FU Erlotinib	0.50 0.50	-0.58	0.7
838	2	0	0.46	0	0.54	0	0	0	0	2	5FU Erlotinib	0.50 0.50	-0.56	2	DOX CBL	0.50 0.50	1.12	1.68	chk1	2	CBL 5FU	0.50 0.50	0.16	2	5FU Erlotinib	0.50 0.50	-0.56	0.72
839	2	0	0.47	0	0.53	0	0	0	0	2	5FU Erlotinib	0.50 0.50	-0.54	2	DOX CBL	0.50 0.50	1.16	1.7	chk1	2	CBL 5FU	0.50 0.50	0.2	2	5FU Erlotinib	0.50 0.50	-0.54	0.74
840	2	0	0.48	0	0.52	0	0	0	0	2	5FU Erlotinib	0.50 0.50	-0.52	2	DOX CBL	0.50 0.50	1.2	1.72	chk1	2	CBL 5FU	0.50 0.50	0.24	2	5FU Erlotinib	0.50 0.50	-0.52	0.76
841	2	0	0.49	0	0.51	0	0	0	0	2	5FU Erlotinib	0.50 0.50	-0.5	2	DOX CBL	0.50 0.50	1.24	1.74	chk1	2	CBL 5FU	0.50 0.50	0.28	2	5FU Erlotinib	0.50 0.50	-0.5	0.78
842	2	0	0.5	0	0.5	0	0	0	0	2	5FU Erlotinib	0.50 0.50	-0.48	2	DOX CBL	0.50 0.50	1.28	1.76	chk1	2	CBL 5FU	0.50 0.50	0.32	2	5FU Erlotinib	0.50 0.50	-0.48	0.8
843	2	0	0.51	0	0.49	0	0	0	0	2	5FU Erlotinib	0.50 0.50	-0.46	2	DOX CBL	0.50 0.50	1.32	1.78	chk2	2	ActD Erlotinib	0.50 0.50	-0.3	2	5FU Erlotinib	0.50 0.50	-0.46	0.16
844	2	0	0.52	0	0.48	0	0	0	0	2	5FU Erlotinib	0.50 0.50	-0.44	2	DOX CBL	0.50 0.50	1.36	1.8	chk2	2	ActD Erlotinib	0.50 0.50	-0.3	2	5FU Erlotinib	0.50 0.50	-0.44	0.14
845	2	0	0.53	0	0.47	0	0	0	0	2	5FU Erlotinib	0.50 0.50	-0.42	2	DOX CBL	0.50 0.50	1.4	1.82	chk2	2	ActD Erlotinib	0.50 0.50	-0.3	2	5FU Erlotinib	0.50 0.50	-0.42	0.12
846	2	0	0.54	0	0.46	0	0	0	0	2	5FU Erlotinib	0.50 0.50	-0.4	2	DOX CBL	0.50 0.50	1.44	1.84	chk2	2	ActD Erlotinib	0.50 0.50	-0.28	2	5FU Erlotinib	0.50 0.50	-0.4	0.12
847	2	0	0.55	0	0.45	0	0	0	0	2	5FU Erlotinib	0.50 0.50	-0.38	2	DOX CBL	0.50 0.50	1.48	1.86	chk2	2	ActD Erlotinib	0.50 0.50	-0.28	2	5FU Erlotinib	0.50 0.50	-0.38	0.1
848	2	0	0.56	0	0.44	0	0	0	0	2	5FU Erlotinib	0.50 0.50	-0.36	2	DOX CBL	0.50 0.50	1.52	1.88	chk2	2	ActD Erlotinib	0.50 0.50	-0.28	2	5FU Erlotinib	0.50 0.50	-0.36	0.08
849	2	0	0.57	0	0.43	0	0	0	0	2	5FU Erlotinib	0.50 0.50	-0.34	2	DOX CBL	0.50 0.50	1.56	1.9	chk2	2	ActD Erlotinib	0.50 0.50	-0.26	2	5FU Erlotinib	0.50 0.50	-0.34	0.08
850	2	0	0.58	0	0.42	0	0	0	0	2	5FU Erlotinib	0.50 0.50	-0.32	2	DOX CBL	0.50 0.50	1.6	1.92	chk2	2	ActD Erlotinib	0.50 0.50	-0.26	2	5FU Erlotinib	0.50 0.50	-0.32	0.06
851	2	0	0.59	0	0.41	0	0	0	0	2	5FU Erlotinib	0.50 0.50	-0.3	2	DOX CBL	0.50 0.50	1.64	1.94	chk2	2	ActD Erlotinib	0.50 0.50	-0.26	2	5FU Erlotinib	0.50 0.50	-0.3	0.04
852	2	0	0.6	0	0.4	0	0	0	0	2	5FU Erlotinib	0.50 0.50	-0.28	2	DOX CBL	0.50 0.50	1.68	1.96	chk2	2	ActD Erlotinib	0.50 0.50	-0.26	2	5FU Erlotinib	0.50 0.50	-0.28	0.02
853	2	0	0.61	0	0.39	0	0	0	0	2	5FU Erlotinib	0.50 0.50	-0.26	2	DOX CBL	0.50 0.50	1.72	1.98	chk2	2	ActD Erlotinib	0.50 0.50	-0.24	2	5FU Erlotinib	0.50 0.50	-0.26	0.02
854	2	0	0.62	0	0.38	0	0	0	0	2	ActD Erlotinib	0.50 0.50	-0.24	2	DOX CBL	0.50 0.50	1.76	2	chk2	2	ActD Erlotinib	0.50 0.50	-0.24	2	ActD Erlotinib	0.50 0.50	-0.24	0
855	2	0	0.63	0	0.37	0	0	0	0	2	ActD Erlotinib	0.50 0.50	-0.24	2	DOX CBL	0.50 0.50	1.8	2.04	chk2	2	ActD Erlotinib	0.50 0.50	-0.24	2	ActD Erlotinib	0.50 0.50	-0.24	0
856	2	0	0.64	0	0.36	0	0	0	0	2	ActD Erlotinib	0.50 0.50	-0.22	2	DOX CBL	0.50 0.50	1.84	2.06	chk2	2	ActD Erlotinib	0.50 0.50	-0.22	2	ActD Erlotinib	0.50 0.50	-0.22	0
857	2	0	0.65	0	0.35	0	0	0	0	2	ActD Erlotinib	0.50 0.50	-0.22	2	DOX CBL	0.50 0.50	1.88	2.1	chk2	2	ActD Erlotinib	0.50 0.50	-0.22	2	ActD Erlotinib	0.50 0.50	-0.22	0
858	2	0	0.66	0	0.34	0	0	0	0	2	ActD Erlotinib	0.50 0.50	-0.22	2	DOX CBL	0.50 0.50	1.92	2.14	chk2	2	ActD Erlotinib	0.50 0.50	-0.22	2	ActD Erlotinib	0.50 0.50	-0.22	0
859	2	0	0.67	0	0.33	0	0	0	0	2	ActD Erlotinib	0.50 0.50	-0.2	2	DOX CBL	0.50 0.50	1.96	2.16	chk2	2	ActD Erlotinib	0.50 0.50	-0.2	2	ActD Erlotinib	0.50 0.50	-0.2	0
860	2	0	0.68	0	0.32	0	0	0	0	2	ActD Erlotinib	0.50 0.50	-0.2	2	DOX CBL	0.50 0.50	2	2.2	chk2	2	ActD Erlotinib	0.50 0.50	-0.2	2	ActD Erlotinib	0.50 0.50	-0.2	0
861	2	0	0.69	0	0.31	0	0	0	0	2	ActD Erlotinib	0.50 0.50	-0.2	2	DOX CBL	0.50 0.50	2.04	2.24	chk2	2	ActD Erlotinib	0.50 0.50	-0.2	2	ActD Erlotinib	0.50 0.50	-0.2	0
862	2	0	0.7	0	0.3	0	0	0	0	2	ActD Erlotinib	0.50 0.50	-0.18	2	DOX CBL	0.50 0.50	2.08	2.26	chk2	2	ActD Erlotinib	0.50 0.50	-0.18	2	ActD Erlotinib	0.50 0.50	-0.18	0
863	2	0	0.71	0	0.29	0	0	0	0	2	ActD Erlotinib	0.50 0.50	-0.18	2	DOX CBL	0.50 0.50	2.12	2.3	chk2	2	ActD Erlotinib	0.50 0.50	-0.18	2	ActD Erlotinib	0.50 0.50	-0.18	0
864	2	0	0.72	0	0.28	0	0	0	0	2	ActD Erlotinib	0.50 0.50	-0.18	2	DOX CBL	0.50 0.50	2.16	2.34	chk2	2	ActD Erlotinib	0.50 0.50	-0.18	2	ActD Erlotinib	0.50 0.50	-0.18	0
865	2	0	0.73	0	0.27	0	0	0	0	2	ActD Erlotinib	0.50 0.50	-0.16	2	DOX CBL	0.50 0.50	2.2	2.36	chk2	2	ActD Erlotinib	0.50 0.50	-0.16	2	ActD Erlotinib	0.50 0.50	-0.16	0
866	2	0	0.74	0	0.26	0	0	0	0	2	ActD Erlotinib	0.50 0.50	-0.16	2	CBL IRT	0.50 0.50	2.24	2.4	chk2	2	ActD Erlotinib	0.50 0.50	-0.16	2	ActD Erlotinib	0.50 0.50	-0.16	0
867	2	0	0.75	0	0.25	0	0	0	0	2	ActD Erlotinib	0.50 0.50	-0.16	2	CBL IRT	0.50 0.50	2.3	2.46	chk2	2	ActD Erlotinib	0.50 0.50	-0.16	2	ActD Erlotinib	0.50 0.50	-0.16	0
868	2	0	0.76	0	0.24	0	0	0	0	2	ActD Erlotinib	0.50 0.50	-0.14	2	CBL IRT	0.50 0.50	2.34	2.48	chk2	2	ActD Erlotinib	0.50 0.50	-0.14	2	ActD Erlotinib	0.50 0.50	-0.14	0
869	2	0	0.77	0	0.23	0	0	0	0	2	ActD Erlotinib	0.50 0.50	-0.14	2	CBL IRT	0.50 0.50	2.38	2.52	chk2	2	ActD Erlotinib	0.50 0.50	-0.14	2	ActD Erlotinib	0.50 0.50	-0.14	0
870	2	0	0.78	0	0.22	0	0	0	0	2	ActD Erlotinib	0.50 0.50	-0.14	2	CBL IRT	0.50 0.50	2.44	2.58	chk2	2	ActD Erlotinib	0.50 0.50	-0.14	2	ActD Erlotinib	0.50 0.50	-0.14	0
871	2	0	0.79	0	0.21	0	0	0	0	2	ActD Erlotinib	0.50 0.50	-0.12	2	CBL IRT	0.50 0.50	2.48	2.6	chk2	2	ActD Erlotinib	0.50 0.50	-0.12	2	ActD Erlotinib	0.50 0.50	-0.12	0
872	2	0	0.8	0	0.2	0	0	0	0	2	ActD Erlotinib	0.50 0.50	-0.12	2	CBL IRT	0.50 0.50	2.52	2.64	chk2	2	ActD Erlotinib	0.50 0.50	-0.12	2	ActD Erlotinib	0.50 0.50	-0.12	0
873	2	0	0.81	0	0.19	0	0	0	0	2	ActD Erlotinib	0.50 0.50	-0.12	2	CBL IRT	0.50 0.50	2.58	2.7	chk2	2	ActD Erlotinib	0.50 0.50	-0.12	2	ActD Erlotinib	0.50 0.50	-0.12	0
874	2	0	0.82	0	0.18	0	0	0	0	2	ActD Erlotinib	0.50 0.50	-0.12	2	CBL IRT	0.50 0.50	2.62	2.74	chk2	2	ActD Erlotinib	0.50 0.50	-0.12	2	ActD Erlotinib	0.50 0.50	-0.12	0
875	2	0	0.83	0	0.17	0	0	0	0	2	ActD Erlotinib	0.50 0.50	-0.1	2	CBL IRT	0.50 0.50	2.68	2.78	chk2	2	ActD Erlotinib	0.50 0.50	-0.1	2	ActD Erlotinib	0.50 0.50	-0.1	0
876	2	0	0.84	0	0.16	0	0	0	0	2	ActD Erlotinib	0.50 0.50	-0.1	2	CBL IRT	0.50 0.50	2.72	2.82	chk2	2	ActD Erlotinib	0.50 0.50	-0.1	2	ActD Erlotinib	0.50 0.50	-0.1	0
877	2	0	0.85	0	0.15	0	0	0	0	2	ActD Erlotinib	0.50 0.50	-0.1	2	CBL IRT	0.50 0.50	2.76	2.86	chk2	2	ActD Erlotinib	0.50 0.50	-0.1	2	ActD Erlotinib	0.50 0.50	-0.1	0
878	2	0	0.86	0	0.14	0	0	0	0	2	ActD Erlotinib	0.50 0.50	-0.08	2	CBL IRT	0.50 0.50	2.82	2.9	chk2	2	ActD Erlotinib	0.50 0.50	-0.08	2	ActD Erlotinib	0.50 0.50	-0.08	0
879	2	0	0.87	0	0.13	0	0	0	0	2	ActD Erlotinib	0.50 0.50	-0.08	2	CBL IRT	0.50 0.50	2.86	2.94	chk2	2	ActD Erlotinib	0.50 0.50	-0.08	2	ActD Erlotinib	0.50 0.50	-0.08	0
880	2	0	0.88	0	0.12	0	0	0	0	2	ActD Erlotinib	0.50 0.50	-0.08	2	CBL IRT	0.50 0.50	2.9	2.98	chk2	2	ActD Erlotinib	0.50 0.50	-0.08	2	ActD Erlotinib	0.50 0.50	-0.08	0
881	2	0	0.89	0	0.11	0	0	0	0	2	ActD Erlotinib	0.50 0.50	-0.06	2	CBL IRT	0.50 0.50	2.96	3.02	chk2	2	ActD Erlotinib	0.50 0.50	-0.06	2	ActD Erlotinib	0.50 0.50	-0.06	0
882	2	0	0.9	0	0.1	0	0	0	0	2	ActD Erlotinib	0.50 0.50	-0.06	2	CBL IRT	0.50 0.50	3	3.06	chk2	2	ActD Erlotinib	0.50 0.50	-0.06	2	ActD Erlotinib	0.50 0.50	-0.06	0
883	2	0	0.91	0	0.09	0	0	0	0	2	ActD Erlotinib	0.50 0.50	-0.06	2	CBL IRT	0.50 0.50	3.04	3.1	chk2	2	ActD Erlotinib	0.50 0.50	-0.06	2	ActD Erlotinib	0.50 0.50	-0.06	0
884	2	0	0.92	0	0.08	0	0	0	0	2	ActD Erlotinib	0.50 0.50	-0.04	2	CBL IRT	0.50 0.50	3.1	3.14	chk2	2	ActD Erlotinib	0.50 0.50	-0.04	2	ActD Erlotinib	0.50 0.50	-0.04	0
885	2	0	0.93	0	0.07	0	0	0	0	2	ActD Erlotinib	0.50 0.50	-0.04	2	CBL IRT	0.50 0.50	3.14	3.18	chk2	2	ActD Erlotinib	0.50 0.50	-0.04	2	ActD Erlotinib	0.50 0.50	-0.04	0
886	2	0	0.94	0	0.06	0	0	0	0	2	ActD Erlotinib	0.50 0.50	-0.04	2	CBL IRT	0.50 0.50	3.2	3.24	chk2	2	ActD Erlotinib	0.50 0.50	-0.04	2	ActD Erlotinib	0.50 0.50	-0.04	0
887	2	0	0.95	0	0.05	0	0	0	0	2	ActD Erlotinib	0.50 0.50	-0.02	2	CBL IRT	0.50 0.50	3.24	3.26	chk2	2	ActD Erlotinib	0.50 0.50	-0.02	2	ActD Erlotinib	0.50 0.50	-0.02	0
888	2	0	0.96	0	0.04	0	0	0	0	2	ActD Erlotinib	0.50 0.50	-0.02	2	CBL IRT	0.50 0.50	3.28	3.3	chk2	2	ActD Erlotinib	0.50 0.50	-0.02	2	ActD Erlotinib	0.50 0.50	-0.02	0
889	2	0	0.97	0	0.03	0	0	0	0	2	ActD Erlotinib	0.50 0.50	-0.02	2	CBL IRT	0.50 0.50	3.34	3.36	chk2	2	ActD Erlotinib	0.50 0.50	-0.02	2	ActD Erlotinib	0.50 0.50	-0.02	0
890	2	0	0.98	0	0.02	0	0	0	0	2	ActD Erlotinib	0.50 0.50	0	2	CBL IRT	0.50 0.50	3.38	3.38	chk2	2	ActD Erlotinib	0.50 0.50	0	2	ActD Erlotinib	0.50 0.50	0	0
891	2	0	0.99	0	0.01	0	0	0	0	2	ActD Erlotinib	0.50 0.50	0	2	CBL IRT	0.50 0.50	3.42	3.42	chk2	2	ActD Erlotinib	0.50 0.50	0	2	ActD Erlotinib	0.50 0.50	0	0
892	2	0	0.01	0	0	0.99	0	0	0	2	DOX SAHA	0.50 0.50	-1.98	2	IRT Sunitinib	0.50 0.50	0.36	2.34	atx	2	DOX SAHA	0.50 0.50	-1.98	2	DOX SAHA	0.50 0.50	-1.98	0
893	2	0	0.02	0	0	0.98	0	0	0	2	DOX SAHA	0.50 0.50	-1.94	2	IRT Sunitinib	0.50 0.50	0.38	2.32	atx	2	DOX SAHA	0.50 0.50	-1.94	2	DOX SAHA	0.50 0.50	-1.94	0
894	2	0	0.03	0	0	0.97	0	0	0	2	DOX SAHA	0.50 0.50	-1.92	2	IRT Sunitinib	0.50 0.50	0.4	2.32	atx	2	DOX SAHA	0.50 0.50	-1.92	2	DOX SAHA	0.50 0.50	-1.92	0
895	2	0	0.04	0	0	0.96	0	0	0	2	DOX SAHA	0.50 0.50	-1.88	2	IRT Sunitinib	0.50 0.50	0.44	2.32	atx	2	DOX SAHA	0.50 0.50	-1.88	2	DOX SAHA	0.50 0.50	-1.88	0
896	2	0	0.05	0	0	0.95	0	0	0	2	DOX SAHA	0.50 0.50	-1.84	2	IRT Sunitinib	0.50 0.50	0.46	2.3	atx	2	DOX SAHA	0.50 0.50	-1.84	2	DOX SAHA	0.50 0.50	-1.84	0
897	2	0	0.06	0	0	0.94	0	0	0	2	DOX SAHA	0.50 0.50	-1.8	2	IRT Sunitinib	0.50 0.50	0.48	2.28	atx	2	DOX SAHA	0.50 0.50	-1.8	2	DOX SAHA	0.50 0.50	-1.8	0
898	2	0	0.07	0	0	0.93	0	0	0	2	DOX SAHA	0.50 0.50	-1.76	2	IRT Sunitinib	0.50 0.50	0.5	2.26	atx	2	DOX SAHA	0.50 0.50	-1.76	2	DOX SAHA	0.50 0.50	-1.76	0
899	2	0	0.08	0	0	0.92	0	0	0	2	DOX SAHA	0.50 0.50	-1.72	2	IRT Sunitinib	0.50 0.50	0.52	2.24	atx	2	DOX SAHA	0.50 0.50	-1.72	2	DOX SAHA	0.50 0.50	-1.72	0
900	2	0	0.09	0	0	0.91	0	0	0	2	DOX SAHA	0.50 0.50	-1.7	2	IRT Sunitinib	0.50 0.50	0.54	2.24	atx	2	DOX SAHA	0.50 0.50	-1.7	2	DOX SAHA	0.50 0.50	-1.7	0
901	2	0	0.1	0	0	0.9	0	0	0	2	DOX SAHA	0.50 0.50	-1.66	2	IRT Sunitinib	0.50 0.50	0.56	2.22	atx	2	DOX SAHA	0.50 0.50	-1.66	2	DOX SAHA	0.50 0.50	-1.66	0
902	2	0	0.11	0	0	0.89	0	0	0	2	DOX SAHA	0.50 0.50	-1.62	2	IRT Sunitinib	0.50 0.50	0.58	2.2	atx	2	DOX SAHA	0.50 0.50	-1.62	2	DOX SAHA	0.50 0.50	-1.62	0
903	2	0	0.12	0	0	0.88	0	0	0	2	DOX SAHA	0.50 0.50	-1.58	2	IRT Sunitinib	0.50 0.50	0.6	2.18	atx	2	DOX SAHA	0.50 0.50	-1.58	2	DOX SAHA	0.50 0.50	-1.58	0
904	2	0	0.13	0	0	0.87	0	0	0	2	DOX SAHA	0.50 0.50	-1.54	2	IRT Sunitinib	0.50 0.50	0.62	2.16	atx	2	DOX SAHA	0.50 0.50	-1.54	2	DOX SAHA	0.50 0.50	-1.54	0
905	2	0	0.14	0	0	0.86	0	0	0	2	ActD SAHA	0.50 0.50	-1.52	2	IRT Sunitinib	0.50 0.50	0.64	2.16	atx	2	DOX SAHA	0.50 0.50	-1.5	2	ActD SAHA	0.50 0.50	-1.52	0.02
906	2	0	0.15	0	0	0.85	0	0	0	2	ActD SAHA	0.50 0.50	-1.5	2	IRT Sunitinib	0.50 0.50	0.66	2.16	atx	2	DOX SAHA	0.50 0.50	-1.48	2	ActD SAHA	0.50 0.50	-1.5	0.02
907	2	0	0.16	0	0	0.84	0	0	0	2	ActD SAHA	0.50 0.50	-1.48	2	IRT Sunitinib	0.50 0.50	0.68	2.16	atx	2	DOX SAHA	0.50 0.50	-1.44	2	ActD SAHA	0.50 0.50	-1.48	0.04
908	2	0	0.17	0	0	0.83	0	0	0	2	ActD SAHA	0.50 0.50	-1.46	2	IRT Sunitinib	0.50 0.50	0.7	2.16	atx	2	DOX SAHA	0.50 0.50	-1.4	2	ActD SAHA	0.50 0.50	-1.46	0.06
909	2	0	0.18	0	0	0.82	0	0	0	2	ActD SAHA	0.50 0.50	-1.44	2	IRT Sunitinib	0.50 0.50	0.72	2.16	atx	2	DOX SAHA	0.50 0.50	-1.36	2	ActD SAHA	0.50 0.50	-1.44	0.08
910	2	0	0.19	0	0	0.81	0	0	0	2	ActD SAHA	0.50 0.50	-1.42	2	IRT Sunitinib	0.50 0.50	0.74	2.16	atx	2	DOX SAHA	0.50 0.50	-1.32	2	ActD SAHA	0.50 0.50	-1.42	0.1
911	2	0	0.2	0	0	0.8	0	0	0	2	ActD SAHA	0.50 0.50	-1.4	2	IRT Sunitinib	0.50 0.50	0.76	2.16	atx	2	DOX SAHA	0.50 0.50	-1.28	2	ActD SAHA	0.50 0.50	-1.4	0.12
912	2	0	0.21	0	0	0.79	0	0	0	2	ActD SAHA	0.50 0.50	-1.38	2	IRT Sunitinib	0.50 0.50	0.78	2.16	atx	2	DOX SAHA	0.50 0.50	-1.26	2	ActD SAHA	0.50 0.50	-1.38	0.12
913	2	0	0.22	0	0	0.78	0	0	0	2	ActD SAHA	0.50 0.50	-1.36	2	IRT Sunitinib	0.50 0.50	0.8	2.16	atx	2	DOX SAHA	0.50 0.50	-1.22	2	ActD SAHA	0.50 0.50	-1.36	0.14
914	2	0	0.23	0	0	0.77	0	0	0	2	ActD SAHA	0.50 0.50	-1.34	2	IRT Sunitinib	0.50 0.50	0.82	2.16	atx	2	DOX SAHA	0.50 0.50	-1.18	2	ActD SAHA	0.50 0.50	-1.34	0.16
915	2	0	0.24	0	0	0.76	0	0	0	2	ActD SAHA	0.50 0.50	-1.32	2	IRT Sunitinib	0.50 0.50	0.84	2.16	atx	2	DOX SAHA	0.50 0.50	-1.14	2	ActD SAHA	0.50 0.50	-1.32	0.18
916	2	0	0.25	0	0	0.75	0	0	0	2	ActD SAHA	0.50 0.50	-1.3	2	IRT Sunitinib	0.50 0.50	0.86	2.16	atx	2	DOX SAHA	0.50 0.50	-1.1	2	ActD SAHA	0.50 0.50	-1.3	0.2
917	2	0	0.26	0	0	0.74	0	0	0	2	ActD SAHA	0.50 0.50	-1.28	2	IRT Sunitinib	0.50 0.50	0.88	2.16	atx	2	DOX SAHA	0.50 0.50	-1.06	2	ActD SAHA	0.50 0.50	-1.28	0.22
918	2	0	0.27	0	0	0.73	0	0	0	2	ActD SAHA	0.50 0.50	-1.26	2	IRT Sunitinib	0.50 0.50	0.9	2.16	atx	2	DOX SAHA	0.50 0.50	-1.04	2	ActD SAHA	0.50 0.50	-1.26	0.22
919	2	0	0.28	0	0	0.72	0	0	0	2	ActD SAHA	0.50 0.50	-1.24	2	IRT Sunitinib	0.50 0.50	0.92	2.16	atx	2	DOX SAHA	0.50 0.50	-1	2	ActD SAHA	0.50 0.50	-1.24	0.24
920	2	0	0.29	0	0	0.71	0	0	0	2	ActD SAHA	0.50 0.50	-1.22	2	IRT Sunitinib	0.50 0.50	0.94	2.16	atx	2	DOX SAHA	0.50 0.50	-0.96	2	ActD SAHA	0.50 0.50	-1.22	0.26
921	2	0	0.3	0	0	0.7	0	0	0	2	ActD SAHA	0.50 0.50	-1.2	2	IRT Sunitinib	0.50 0.50	0.96	2.16	atx	2	DOX SAHA	0.50 0.50	-0.92	2	ActD SAHA	0.50 0.50	-1.2	0.28
922	2	0	0.31	0	0	0.69	0	0	0	2	ActD SAHA	0.50 0.50	-1.18	2	IRT Sunitinib	0.50 0.50	0.98	2.16	atx	2	DOX SAHA	0.50 0.50	-0.88	2	ActD SAHA	0.50 0.50	-1.18	0.3
923	2	0	0.32	0	0	0.68	0	0	0	2	ActD SAHA	0.50 0.50	-1.16	2	IRT Sunitinib	0.50 0.50	1	2.16	atx	2	DOX SAHA	0.50 0.50	-0.84	2	ActD SAHA	0.50 0.50	-1.16	0.32
924	2	0	0.33	0	0	0.67	0	0	0	2	ActD SAHA	0.50 0.50	-1.14	2	IRT Sunitinib	0.50 0.50	1.02	2.16	atx	2	DOX SAHA	0.50 0.50	-0.82	2	ActD SAHA	0.50 0.50	-1.14	0.32
925	2	0	0.34	0	0	0.66	0	0	0	2	ActD SAHA	0.50 0.50	-1.12	2	IRT Sunitinib	0.50 0.50	1.04	2.16	atx	2	DOX SAHA	0.50 0.50	-0.78	2	ActD SAHA	0.50 0.50	-1.12	0.34
926	2	0	0.35	0	0	0.65	0	0	0	2	ActD SAHA	0.50 0.50	-1.12	2	IRT Sunitinib	0.50 0.50	1.08	2.2	atx	2	DOX SAHA	0.50 0.50	-0.74	2	ActD SAHA	0.50 0.50	-1.12	0.38
927	2	0	0.36	0	0	0.64	0	0	0	2	ActD SAHA	0.50 0.50	-1.1	2	IRT Sunitinib	0.50 0.50	1.1	2.2	atx	2	DOX SAHA	0.50 0.50	-0.7	2	ActD SAHA	0.50 0.50	-1.1	0.4
928	2	0	0.37	0	0	0.63	0	0	0	2	ActD SAHA	0.50 0.50	-1.08	2	IRT Sunitinib	0.50 0.50	1.12	2.2	atx	2	DOX SAHA	0.50 0.50	-0.66	2	ActD SAHA	0.50 0.50	-1.08	0.42
929	2	0	0.38	0	0	0.62	0	0	0	2	ActD SAHA	0.50 0.50	-1.06	2	IRT Sunitinib	0.50 0.50	1.14	2.2	atx	2	DOX SAHA	0.50 0.50	-0.62	2	ActD SAHA	0.50 0.50	-1.06	0.44
930	2	0	0.39	0	0	0.61	0	0	0	2	ActD SAHA	0.50 0.50	-1.04	2	IRT Sunitinib	0.50 0.50	1.16	2.2	atx	2	DOX SAHA	0.50 0.50	-0.6	2	ActD SAHA	0.50 0.50	-1.04	0.44
931	2	0	0.4	0	0	0.6	0	0	0	2	ActD SAHA	0.50 0.50	-1.02	2	IRT Sunitinib	0.50 0.50	1.18	2.2	atx	2	DOX SAHA	0.50 0.50	-0.56	2	ActD SAHA	0.50 0.50	-1.02	0.46
932	2	0	0.41	0	0	0.59	0	0	0	2	ActD SAHA	0.50 0.50	-1	2	IRT Sunitinib	0.50 0.50	1.2	2.2	atx	2	DOX SAHA	0.50 0.50	-0.52	2	ActD SAHA	0.50 0.50	-1	0.48
933	2	0	0.42	0	0	0.58	0	0	0	2	ActD SAHA	0.50 0.50	-0.98	2	IRT Sunitinib	0.50 0.50	1.22	2.2	atx	2	DOX SAHA	0.50 0.50	-0.48	2	ActD SAHA	0.50 0.50	-0.98	0.5
934	2	0	0.43	0	0	0.57	0	0	0	2	ActD SAHA	0.50 0.50	-0.96	2	IRT Sunitinib	0.50 0.50	1.24	2.2	atx	2	DOX SAHA	0.50 0.50	-0.44	2	ActD SAHA	0.50 0.50	-0.96	0.52
935	2	0	0.44	0	0	0.56	0	0	0	2	ActD SAHA	0.50 0.50	-0.94	2	IRT Sunitinib	0.50 0.50	1.26	2.2	atx	2	DOX SAHA	0.50 0.50	-0.4	2	ActD SAHA	0.50 0.50	-0.94	0.54
936	2	0	0.45	0	0	0.55	0	0	0	2	ActD SAHA	0.50 0.50	-0.92	2	CBL IRT	0.50 0.50	1.28	2.2	atx	2	DOX SAHA	0.50 0.50	-0.38	2	ActD SAHA	0.50 0.50	-0.92	0.54
937	2	0	0.46	0	0	0.54	0	0	0	2	ActD SAHA	0.50 0.50	-0.9	2	CBL IRT	0.50 0.50	1.32	2.22	atx	2	DOX SAHA	0.50 0.50	-0.34	2	ActD SAHA	0.50 0.50	-0.9	0.56
938	2	0	0.47	0	0	0.53	0	0	0	2	ActD SAHA	0.50 0.50	-0.88	2	CBL IRT	0.50 0.50	1.36	2.24	atx	2	DOX SAHA	0.50 0.50	-0.3	2	ActD SAHA	0.50 0.50	-0.88	0.58
939	2	0	0.48	0	0	0.52	0	0	0	2	ActD SAHA	0.50 0.50	-0.86	2	CBL IRT	0.50 0.50	1.4	2.26	atx	2	DOX SAHA	0.50 0.50	-0.26	2	ActD SAHA	0.50 0.50	-0.86	0.6
940	2	0	0.49	0	0	0.51	0	0	0	2	ActD SAHA	0.50 0.50	-0.84	2	CBL IRT	0.50 0.50	1.44	2.28	atx	2	DOX SAHA	0.50 0.50	-0.22	2	ActD SAHA	0.50 0.50	-0.84	0.62
941	2	0	0.5	0	0	0.5	0	0	0	2	ActD SAHA	0.50 0.50	-0.82	2	CBL IRT	0.50 0.50	1.48	2.3	atx	2	DOX SAHA	0.50 0.50	-0.18	2	ActD SAHA	0.50 0.50	-0.82	0.64
942	2	0	0.51	0	0	0.49	0	0	0	2	ActD SAHA	0.50 0.50	-0.8	2	CBL IRT	0.50 0.50	1.52	2.32	chk2	2	ActD Erlotinib	0.50 0.50	-0.64	2	ActD SAHA	0.50 0.50	-0.8	0.16
943	2	0	0.52	0	0	0.48	0	0	0	2	ActD SAHA	0.50 0.50	-0.78	2	CBL IRT	0.50 0.50	1.56	2.34	chk2	2	ActD Erlotinib	0.50 0.50	-0.62	2	ActD SAHA	0.50 0.50	-0.78	0.16
944	2	0	0.53	0	0	0.47	0	0	0	2	ActD SAHA	0.50 0.50	-0.76	2	CBL IRT	0.50 0.50	1.6	2.36	chk2	2	ActD Erlotinib	0.50 0.50	-0.6	2	ActD SAHA	0.50 0.50	-0.76	0.16
945	2	0	0.54	0	0	0.46	0	0	0	2	ActD SAHA	0.50 0.50	-0.74	2	CBL IRT	0.50 0.50	1.64	2.38	chk2	2	ActD Erlotinib	0.50 0.50	-0.6	2	ActD SAHA	0.50 0.50	-0.74	0.14
946	2	0	0.55	0	0	0.45	0	0	0	2	ActD SAHA	0.50 0.50	-0.72	2	CBL IRT	0.50 0.50	1.68	2.4	chk2	2	ActD Erlotinib	0.50 0.50	-0.58	2	ActD SAHA	0.50 0.50	-0.72	0.14
947	2	0	0.56	0	0	0.44	0	0	0	2	ActD SAHA	0.50 0.50	-0.7	2	CBL IRT	0.50 0.50	1.72	2.42	chk2	2	ActD Erlotinib	0.50 0.50	-0.56	2	ActD SAHA	0.50 0.50	-0.7	0.14
948	2	0	0.57	0	0	0.43	0	0	0	2	ActD SAHA	0.50 0.50	-0.68	2	CBL IRT	0.50 0.50	1.76	2.44	chk2	2	ActD Erlotinib	0.50 0.50	-0.56	2	ActD SAHA	0.50 0.50	-0.68	0.12
949	2	0	0.58	0	0	0.42	0	0	0	2	ActD SAHA	0.50 0.50	-0.66	2	CBL IRT	0.50 0.50	1.8	2.46	chk2	2	ActD Erlotinib	0.50 0.50	-0.54	2	ActD SAHA	0.50 0.50	-0.66	0.12
950	2	0	0.59	0	0	0.41	0	0	0	2	ActD SAHA	0.50 0.50	-0.64	2	CBL IRT	0.50 0.50	1.84	2.48	chk2	2	ActD Erlotinib	0.50 0.50	-0.54	2	ActD SAHA	0.50 0.50	-0.64	0.1
951	2	0	0.6	0	0	0.4	0	0	0	2	ActD SAHA	0.50 0.50	-0.62	2	CBL IRT	0.50 0.50	1.88	2.5	chk2	2	ActD Erlotinib	0.50 0.50	-0.52	2	ActD SAHA	0.50 0.50	-0.62	0.1
952	2	0	0.61	0	0	0.39	0	0	0	2	ActD SAHA	0.50 0.50	-0.6	2	CBL IRT	0.50 0.50	1.92	2.52	chk2	2	ActD Erlotinib	0.50 0.50	-0.5	2	ActD SAHA	0.50 0.50	-0.6	0.1
953	2	0	0.62	0	0	0.38	0	0	0	2	ActD SAHA	0.50 0.50	-0.58	2	CBL IRT	0.50 0.50	1.96	2.54	chk2	2	ActD Erlotinib	0.50 0.50	-0.5	2	ActD SAHA	0.50 0.50	-0.58	0.08
954	2	0	0.63	0	0	0.37	0	0	0	2	ActD SAHA	0.50 0.50	-0.56	2	CBL IRT	0.50 0.50	2	2.56	chk2	2	ActD Erlotinib	0.50 0.50	-0.48	2	ActD SAHA	0.50 0.50	-0.56	0.08
955	2	0	0.64	0	0	0.36	0	0	0	2	ActD SAHA	0.50 0.50	-0.54	2	CBL IRT	0.50 0.50	2.04	2.58	chk2	2	ActD Erlotinib	0.50 0.50	-0.46	2	ActD SAHA	0.50 0.50	-0.54	0.08
956	2	0	0.65	0	0	0.35	0	0	0	2	ActD SAHA	0.50 0.50	-0.52	2	CBL IRT	0.50 0.50	2.08	2.6	chk2	2	ActD Erlotinib	0.50 0.50	-0.46	2	ActD SAHA	0.50 0.50	-0.52	0.06
957	2	0	0.66	0	0	0.34	0	0	0	2	ActD SAHA	0.50 0.50	-0.5	2	CBL IRT	0.50 0.50	2.12	2.62	chk2	2	ActD Erlotinib	0.50 0.50	-0.44	2	ActD SAHA	0.50 0.50	-0.5	0.06
958	2	0	0.67	0	0	0.33	0	0	0	2	ActD SAHA	0.50 0.50	-0.48	2	CBL IRT	0.50 0.50	2.16	2.64	chk2	2	ActD Erlotinib	0.50 0.50	-0.42	2	ActD SAHA	0.50 0.50	-0.48	0.06
959	2	0	0.68	0	0	0.32	0	0	0	2	ActD SAHA	0.50 0.50	-0.46	2	CBL IRT	0.50 0.50	2.2	2.66	chk2	2	ActD Erlotinib	0.50 0.50	-0.42	2	ActD SAHA	0.50 0.50	-0.46	0.04
960	2	0	0.69	0	0	0.31	0	0	0	2	ActD SAHA	0.50 0.50	-0.44	2	CBL IRT	0.50 0.50	2.24	2.68	chk2	2	ActD Erlotinib	0.50 0.50	-0.4	2	ActD SAHA	0.50 0.50	-0.44	0.04
961	2	0	0.7	0	0	0.3	0	0	0	2	ActD SAHA	0.50 0.50	-0.42	2	CBL IRT	0.50 0.50	2.28	2.7	chk2	2	ActD Erlotinib	0.50 0.50	-0.38	2	ActD SAHA	0.50 0.50	-0.42	0.04
962	2	0	0.71	0	0	0.29	0	0	0	2	ActD SAHA	0.50 0.50	-0.4	2	CBL IRT	0.50 0.50	2.32	2.72	chk2	2	ActD Erlotinib	0.50 0.50	-0.38	2	ActD SAHA	0.50 0.50	-0.4	0.02
963	2	0	0.72	0	0	0.28	0	0	0	2	ActD SAHA	0.50 0.50	-0.38	2	CBL IRT	0.50 0.50	2.36	2.74	chk2	2	ActD Erlotinib	0.50 0.50	-0.36	2	ActD SAHA	0.50 0.50	-0.38	0.02
964	2	0	0.73	0	0	0.27	0	0	0	2	ActD SAHA	0.50 0.50	-0.36	2	CBL IRT	0.50 0.50	2.4	2.76	chk2	2	ActD Erlotinib	0.50 0.50	-0.34	2	ActD SAHA	0.50 0.50	-0.36	0.02
965	2	0	0.74	0	0	0.26	0	0	0	2	ActD SAHA	0.50 0.50	-0.34	2	CBL IRT	0.50 0.50	2.44	2.78	chk2	2	ActD Erlotinib	0.50 0.50	-0.34	2	ActD SAHA	0.50 0.50	-0.34	0
966	2	0	0.75	0	0	0.25	0	0	0	2	ActD SAHA	0.50 0.50	-0.32	2	CBL IRT	0.50 0.50	2.48	2.8	chk2	2	ActD Erlotinib	0.50 0.50	-0.32	2	ActD SAHA	0.50 0.50	-0.32	0
967	2	0	0.76	0	0	0.24	0	0	0	2	ActD Erlotinib	0.50 0.50	-0.3	2	CBL IRT	0.50 0.50	2.52	2.82	chk2	2	ActD Erlotinib	0.50 0.50	-0.3	2	ActD Erlotinib	0.50 0.50	-0.3	0
968	2	0	0.77	0	0	0.23	0	0	0	2	ActD Erlotinib	0.50 0.50	-0.3	2	CBL IRT	0.50 0.50	2.56	2.86	chk2	2	ActD Erlotinib	0.50 0.50	-0.3	2	ActD Erlotinib	0.50 0.50	-0.3	0
969	2	0	0.78	0	0	0.22	0	0	0	2	ActD Erlotinib	0.50 0.50	-0.28	2	CBL IRT	0.50 0.50	2.6	2.88	chk2	2	ActD Erlotinib	0.50 0.50	-0.28	2	ActD Erlotinib	0.50 0.50	-0.28	0
970	2	0	0.79	0	0	0.21	0	0	0	2	ActD Erlotinib	0.50 0.50	-0.26	2	CBL IRT	0.50 0.50	2.64	2.9	chk2	2	ActD Erlotinib	0.50 0.50	-0.26	2	ActD Erlotinib	0.50 0.50	-0.26	0
971	2	0	0.8	0	0	0.2	0	0	0	2	ActD Erlotinib	0.50 0.50	-0.26	2	CBL IRT	0.50 0.50	2.68	2.94	chk2	2	ActD Erlotinib	0.50 0.50	-0.26	2	ActD Erlotinib	0.50 0.50	-0.26	0
972	2	0	0.81	0	0	0.19	0	0	0	2	ActD Erlotinib	0.50 0.50	-0.24	2	CBL IRT	0.50 0.50	2.72	2.96	chk2	2	ActD Erlotinib	0.50 0.50	-0.24	2	ActD Erlotinib	0.50 0.50	-0.24	0
973	2	0	0.82	0	0	0.18	0	0	0	2	ActD Erlotinib	0.50 0.50	-0.24	2	CBL IRT	0.50 0.50	2.76	3	chk2	2	ActD Erlotinib	0.50 0.50	-0.24	2	ActD Erlotinib	0.50 0.50	-0.24	0
974	2	0	0.83	0	0	0.17	0	0	0	2	ActD Erlotinib	0.50 0.50	-0.22	2	CBL IRT	0.50 0.50	2.8	3.02	chk2	2	ActD Erlotinib	0.50 0.50	-0.22	2	ActD Erlotinib	0.50 0.50	-0.22	0
975	2	0	0.84	0	0	0.16	0	0	0	2	ActD Erlotinib	0.50 0.50	-0.2	2	CBL IRT	0.50 0.50	2.84	3.04	chk2	2	ActD Erlotinib	0.50 0.50	-0.2	2	ActD Erlotinib	0.50 0.50	-0.2	0
976	2	0	0.85	0	0	0.15	0	0	0	2	ActD Erlotinib	0.50 0.50	-0.2	2	CBL IRT	0.50 0.50	2.88	3.08	chk2	2	ActD Erlotinib	0.50 0.50	-0.2	2	ActD Erlotinib	0.50 0.50	-0.2	0
977	2	0	0.86	0	0	0.14	0	0	0	2	ActD Erlotinib	0.50 0.50	-0.18	2	CBL IRT	0.50 0.50	2.92	3.1	chk2	2	ActD Erlotinib	0.50 0.50	-0.18	2	ActD Erlotinib	0.50 0.50	-0.18	0
978	2	0	0.87	0	0	0.13	0	0	0	2	ActD Erlotinib	0.50 0.50	-0.16	2	CBL IRT	0.50 0.50	2.96	3.12	chk2	2	ActD Erlotinib	0.50 0.50	-0.16	2	ActD Erlotinib	0.50 0.50	-0.16	0
979	2	0	0.88	0	0	0.12	0	0	0	2	ActD Erlotinib	0.50 0.50	-0.16	2	CBL IRT	0.50 0.50	3	3.16	chk2	2	ActD Erlotinib	0.50 0.50	-0.16	2	ActD Erlotinib	0.50 0.50	-0.16	0
980	2	0	0.89	0	0	0.11	0	0	0	2	ActD Erlotinib	0.50 0.50	-0.14	2	CBL IRT	0.50 0.50	3.04	3.18	chk2	2	ActD Erlotinib	0.50 0.50	-0.14	2	ActD Erlotinib	0.50 0.50	-0.14	0
981	2	0	0.9	0	0	0.1	0	0	0	2	ActD Erlotinib	0.50 0.50	-0.12	2	CBL IRT	0.50 0.50	3.08	3.2	chk2	2	ActD Erlotinib	0.50 0.50	-0.12	2	ActD Erlotinib	0.50 0.50	-0.12	0
982	2	0	0.91	0	0	0.09	0	0	0	2	ActD Erlotinib	0.50 0.50	-0.12	2	CBL IRT	0.50 0.50	3.12	3.24	chk2	2	ActD Erlotinib	0.50 0.50	-0.12	2	ActD Erlotinib	0.50 0.50	-0.12	0
983	2	0	0.92	0	0	0.08	0	0	0	2	ActD Erlotinib	0.50 0.50	-0.1	2	CBL IRT	0.50 0.50	3.16	3.26	chk2	2	ActD Erlotinib	0.50 0.50	-0.1	2	ActD Erlotinib	0.50 0.50	-0.1	0
984	2	0	0.93	0	0	0.07	0	0	0	2	ActD Erlotinib	0.50 0.50	-0.08	2	CBL IRT	0.50 0.50	3.2	3.28	chk2	2	ActD Erlotinib	0.50 0.50	-0.08	2	ActD Erlotinib	0.50 0.50	-0.08	0
985	2	0	0.94	0	0	0.06	0	0	0	2	ActD Erlotinib	0.50 0.50	-0.08	2	CBL IRT	0.50 0.50	3.24	3.32	chk2	2	ActD Erlotinib	0.50 0.50	-0.08	2	ActD Erlotinib	0.50 0.50	-0.08	0
986	2	0	0.95	0	0	0.05	0	0	0	2	ActD Erlotinib	0.50 0.50	-0.06	2	CBL IRT	0.50 0.50	3.28	3.34	chk2	2	ActD Erlotinib	0.50 0.50	-0.06	2	ActD Erlotinib	0.50 0.50	-0.06	0
987	2	0	0.96	0	0	0.04	0	0	0	2	ActD Erlotinib	0.50 0.50	-0.04	2	CBL IRT	0.50 0.50	3.32	3.36	chk2	2	ActD Erlotinib	0.50 0.50	-0.04	2	ActD Erlotinib	0.50 0.50	-0.04	0
988	2	0	0.97	0	0	0.03	0	0	0	2	ActD Erlotinib	0.50 0.50	-0.04	2	CBL IRT	0.50 0.50	3.36	3.4	chk2	2	ActD Erlotinib	0.50 0.50	-0.04	2	ActD Erlotinib	0.50 0.50	-0.04	0
989	2	0	0.98	0	0	0.02	0	0	0	2	ActD Erlotinib	0.50 0.50	-0.02	2	CBL IRT	0.50 0.50	3.4	3.42	chk2	2	ActD Erlotinib	0.50 0.50	-0.02	2	ActD Erlotinib	0.50 0.50	-0.02	0
990	2	0	0.99	0	0	0.01	0	0	0	2	ActD Erlotinib	0.50 0.50	0	2	CBL IRT	0.50 0.50	3.44	3.44	chk2	2	ActD Erlotinib	0.50 0.50	0	2	ActD Erlotinib	0.50 0.50	0	0
991	2	0	0.01	0	0	0	0.99	0	0	2	DOX 17AAG	0.50 0.50	-0.9	2	CBL IRT	0.50 0.50	1.04	1.94	dnapk	2	DOX 17AAG	0.50 0.50	-0.9	2	DOX 17AAG	0.50 0.50	-0.9	0
992	2	0	0.02	0	0	0	0.98	0	0	2	DOX 17AAG	0.50 0.50	-0.86	2	CBL IRT	0.50 0.50	1.06	1.92	dnapk	2	DOX 17AAG	0.50 0.50	-0.86	2	DOX 17AAG	0.50 0.50	-0.86	0
993	2	0	0.03	0	0	0	0.97	0	0	2	DOX 17AAG	0.50 0.50	-0.84	2	CBL IRT	0.50 0.50	1.1	1.94	dnapk	2	DOX 17AAG	0.50 0.50	-0.84	2	DOX 17AAG	0.50 0.50	-0.84	0
994	2	0	0.04	0	0	0	0.96	0	0	2	DOX 17AAG	0.50 0.50	-0.8	2	CBL IRT	0.50 0.50	1.12	1.92	dnapk	2	DOX 17AAG	0.50 0.50	-0.8	2	DOX 17AAG	0.50 0.50	-0.8	0
995	2	0	0.05	0	0	0	0.95	0	0	2	DOX 17AAG	0.50 0.50	-0.76	2	CBL IRT	0.50 0.50	1.14	1.9	dnapk	2	DOX 17AAG	0.50 0.50	-0.76	2	DOX 17AAG	0.50 0.50	-0.76	0
996	2	0	0.06	0	0	0	0.94	0	0	2	DOX 17AAG	0.50 0.50	-0.74	2	CBL IRT	0.50 0.50	1.16	1.9	dnapk	2	DOX 17AAG	0.50 0.50	-0.74	2	DOX 17AAG	0.50 0.50	-0.74	0
997	2	0	0.07	0	0	0	0.93	0	0	2	DOX 17AAG	0.50 0.50	-0.7	2	CBL IRT	0.50 0.50	1.2	1.9	dnapk	2	DOX 17AAG	0.50 0.50	-0.7	2	DOX 17AAG	0.50 0.50	-0.7	0
998	2	0	0.08	0	0	0	0.92	0	0	2	DOX 17AAG	0.50 0.50	-0.66	2	CBL IRT	0.50 0.50	1.22	1.88	dnapk	2	DOX 17AAG	0.50 0.50	-0.66	2	DOX 17AAG	0.50 0.50	-0.66	0
999	2	0	0.09	0	0	0	0.91	0	0	2	DOX 17AAG	0.50 0.50	-0.64	2	CBL IRT	0.50 0.50	1.24	1.88	dnapk	2	DOX 17AAG	0.50 0.50	-0.64	2	DOX 17AAG	0.50 0.50	-0.64	0
1000	2	0	0.1	0	0	0	0.9	0	0	2	DOX 17AAG	0.50 0.50	-0.6	2	CBL IRT	0.50 0.50	1.26	1.86	dnapk	2	DOX 17AAG	0.50 0.50	-0.6	2	DOX 17AAG	0.50 0.50	-0.6	0
1001	2	0	0.11	0	0	0	0.89	0	0	2	DOX 17AAG	0.50 0.50	-0.58	2	CBL IRT	0.50 0.50	1.3	1.88	dnapk	2	DOX 17AAG	0.50 0.50	-0.58	2	DOX 17AAG	0.50 0.50	-0.58	0
1002	2	0	0.12	0	0	0	0.88	0	0	2	DOX 17AAG	0.50 0.50	-0.54	2	CBL IRT	0.50 0.50	1.32	1.86	dnapk	2	DOX 17AAG	0.50 0.50	-0.54	2	DOX 17AAG	0.50 0.50	-0.54	0
1003	2	0	0.13	0	0	0	0.87	0	0	2	DOX 17AAG	0.50 0.50	-0.5	2	CBL IRT	0.50 0.50	1.34	1.84	dnapk	2	DOX 17AAG	0.50 0.50	-0.5	2	DOX 17AAG	0.50 0.50	-0.5	0
1004	2	0	0.14	0	0	0	0.86	0	0	2	DOX 17AAG	0.50 0.50	-0.48	2	CBL IRT	0.50 0.50	1.36	1.84	dnapk	2	DOX 17AAG	0.50 0.50	-0.48	2	DOX 17AAG	0.50 0.50	-0.48	0
1005	2	0	0.15	0	0	0	0.85	0	0	2	DOX 17AAG	0.50 0.50	-0.44	2	CBL IRT	0.50 0.50	1.38	1.82	dnapk	2	DOX 17AAG	0.50 0.50	-0.44	2	DOX 17AAG	0.50 0.50	-0.44	0
1006	2	0	0.16	0	0	0	0.84	0	0	2	DOX 17AAG	0.50 0.50	-0.4	2	CBL IRT	0.50 0.50	1.42	1.82	dnapk	2	DOX 17AAG	0.50 0.50	-0.4	2	DOX 17AAG	0.50 0.50	-0.4	0
1007	2	0	0.17	0	0	0	0.83	0	0	2	DOX 17AAG	0.50 0.50	-0.38	2	CBL IRT	0.50 0.50	1.44	1.82	dnapk	2	DOX 17AAG	0.50 0.50	-0.38	2	DOX 17AAG	0.50 0.50	-0.38	0
1008	2	0	0.18	0	0	0	0.82	0	0	2	DOX 17AAG	0.50 0.50	-0.34	2	CBL IRT	0.50 0.50	1.46	1.8	dnapk	2	DOX 17AAG	0.50 0.50	-0.34	2	DOX 17AAG	0.50 0.50	-0.34	0
1009	2	0	0.19	0	0	0	0.81	0	0	2	DOX 17AAG	0.50 0.50	-0.32	2	CBL IRT	0.50 0.50	1.48	1.8	dnapk	2	DOX 17AAG	0.50 0.50	-0.32	2	DOX 17AAG	0.50 0.50	-0.32	0
1010	2	0	0.2	0	0	0	0.8	0	0	2	DOX 17AAG	0.50 0.50	-0.28	2	CBL IRT	0.50 0.50	1.52	1.8	dnapk	2	DOX 17AAG	0.50 0.50	-0.28	2	DOX 17AAG	0.50 0.50	-0.28	0
1011	2	0	0.21	0	0	0	0.79	0	0	2	DOX 17AAG	0.50 0.50	-0.24	2	CBL IRT	0.50 0.50	1.54	1.78	dnapk	2	DOX 17AAG	0.50 0.50	-0.24	2	DOX 17AAG	0.50 0.50	-0.24	0
1012	2	0	0.22	0	0	0	0.78	0	0	2	DOX 17AAG	0.50 0.50	-0.22	2	CBL IRT	0.50 0.50	1.56	1.78	dnapk	2	DOX 17AAG	0.50 0.50	-0.22	2	DOX 17AAG	0.50 0.50	-0.22	0
1013	2	0	0.23	0	0	0	0.77	0	0	2	DOX 17AAG	0.50 0.50	-0.18	2	CBL IRT	0.50 0.50	1.58	1.76	dnapk	2	DOX 17AAG	0.50 0.50	-0.18	2	DOX 17AAG	0.50 0.50	-0.18	0
1014	2	0	0.24	0	0	0	0.76	0	0	2	DOX 17AAG	0.50 0.50	-0.16	2	CBL IRT	0.50 0.50	1.6	1.76	dnapk	2	DOX 17AAG	0.50 0.50	-0.16	2	DOX 17AAG	0.50 0.50	-0.16	0
1015	2	0	0.25	0	0	0	0.75	0	0	2	DOX 17AAG	0.50 0.50	-0.12	2	CBL IRT	0.50 0.50	1.64	1.76	dnapk	2	DOX 17AAG	0.50 0.50	-0.12	2	DOX 17AAG	0.50 0.50	-0.12	0
1016	2	0	0.26	0	0	0	0.74	0	0	2	DOX 17AAG	0.50 0.50	-0.08	2	CBL IRT	0.50 0.50	1.66	1.74	dnapk	2	DOX 17AAG	0.50 0.50	-0.08	2	DOX 17AAG	0.50 0.50	-0.08	0
1017	2	0	0.27	0	0	0	0.73	0	0	2	DOX 17AAG	0.50 0.50	-0.06	2	CBL IRT	0.50 0.50	1.68	1.74	dnapk	2	DOX 17AAG	0.50 0.50	-0.06	2	DOX 17AAG	0.50 0.50	-0.06	0
1018	2	0	0.28	0	0	0	0.72	0	0	2	DOX 17AAG	0.50 0.50	-0.02	2	CBL IRT	0.50 0.50	1.7	1.72	dnapk	2	DOX 17AAG	0.50 0.50	-0.02	2	DOX 17AAG	0.50 0.50	-0.02	0
1019	2	0	0.29	0	0	0	0.71	0	0	2	DOX 17AAG	0.50 0.50	0.02	2	CBL IRT	0.50 0.50	1.74	1.72	dnapk	2	DOX 17AAG	0.50 0.50	0.02	2	DOX 17AAG	0.50 0.50	0.02	0
1020	2	0	0.3	0	0	0	0.7	0	0	2	ActD 17AAG	0.50 0.50	0.04	2	CBL IRT	0.50 0.50	1.76	1.72	dnapk	2	DOX 17AAG	0.50 0.50	0.04	2	ActD 17AAG	0.50 0.50	0.04	0
1021	2	0	0.31	0	0	0	0.69	0	0	2	ActD 17AAG	0.50 0.50	0.04	2	CBL IRT	0.50 0.50	1.78	1.74	dnapk	2	DOX 17AAG	0.50 0.50	0.08	2	ActD 17AAG	0.50 0.50	0.04	0.04
1022	2	0	0.32	0	0	0	0.68	0	0	2	ActD 17AAG	0.50 0.50	0.06	2	CBL IRT	0.50 0.50	1.8	1.74	dnapk	2	DOX 17AAG	0.50 0.50	0.1	2	ActD 17AAG	0.50 0.50	0.06	0.04
1023	2	0	0.33	0	0	0	0.67	0	0	2	ActD 17AAG	0.50 0.50	0.06	2	CBL IRT	0.50 0.50	1.84	1.78	dnapk	2	DOX 17AAG	0.50 0.50	0.14	2	ActD 17AAG	0.50 0.50	0.06	0.08
1024	2	0	0.34	0	0	0	0.66	0	0	2	ActD 17AAG	0.50 0.50	0.08	2	CBL IRT	0.50 0.50	1.86	1.78	dnapk	2	DOX 17AAG	0.50 0.50	0.18	2	ActD 17AAG	0.50 0.50	0.08	0.1
1025	2	0	0.35	0	0	0	0.65	0	0	2	ActD 17AAG	0.50 0.50	0.08	2	CBL IRT	0.50 0.50	1.88	1.8	dnapk	2	DOX 17AAG	0.50 0.50	0.2	2	ActD 17AAG	0.50 0.50	0.08	0.12
1026	2	0	0.36	0	0	0	0.64	0	0	2	Vin ActD	0.50 0.50	0.1	2	CBL IRT	0.50 0.50	1.9	1.8	dnapk	2	DOX 17AAG	0.50 0.50	0.24	2	Vin ActD	0.50 0.50	0.1	0.14
1027	2	0	0.37	0	0	0	0.63	0	0	2	Vin ActD	0.50 0.50	0.1	2	CBL IRT	0.50 0.50	1.92	1.82	dnapk	2	DOX 17AAG	0.50 0.50	0.28	2	Vin ActD	0.50 0.50	0.1	0.18
1028	2	0	0.38	0	0	0	0.62	0	0	2	Vin ActD	0.50 0.50	0.1	2	CBL IRT	0.50 0.50	1.96	1.86	dnapk	2	DOX 17AAG	0.50 0.50	0.3	2	Vin ActD	0.50 0.50	0.1	0.2
1029	2	0	0.39	0	0	0	0.61	0	0	2	Vin ActD	0.50 0.50	0.1	2	CBL IRT	0.50 0.50	1.98	1.88	dnapk	2	DOX 17AAG	0.50 0.50	0.34	2	Vin ActD	0.50 0.50	0.1	0.24
1030	2	0	0.4	0	0	0	0.6	0	0	2	Vin ActD	0.50 0.50	0.1	2	CBL IRT	0.50 0.50	2	1.9	dnapk	2	DOX 17AAG	0.50 0.50	0.36	2	Vin ActD	0.50 0.50	0.1	0.26
1031	2	0	0.41	0	0	0	0.59	0	0	2	Vin ActD	0.50 0.50	0.1	2	CBL IRT	0.50 0.50	2.02	1.92	dnapk	2	DOX 17AAG	0.50 0.50	0.4	2	Vin ActD	0.50 0.50	0.1	0.3
1032	2	0	0.42	0	0	0	0.58	0	0	2	Vin ActD	0.50 0.50	0.1	2	CBL IRT	0.50 0.50	2.06	1.96	dnapk	2	DOX 17AAG	0.50 0.50	0.44	2	Vin ActD	0.50 0.50	0.1	0.34
1033	2	0	0.43	0	0	0	0.57	0	0	2	Vin ActD	0.50 0.50	0.1	2	CBL IRT	0.50 0.50	2.08	1.98	dnapk	2	DOX 17AAG	0.50 0.50	0.46	2	Vin ActD	0.50 0.50	0.1	0.36
1034	2	0	0.44	0	0	0	0.56	0	0	2	Vin ActD	0.50 0.50	0.1	2	CBL IRT	0.50 0.50	2.1	2	dnapk	2	DOX 17AAG	0.50 0.50	0.5	2	Vin ActD	0.50 0.50	0.1	0.4
1035	2	0	0.45	0	0	0	0.55	0	0	2	Vin ActD	0.50 0.50	0.12	2	CBL IRT	0.50 0.50	2.12	2	dnapk	2	DOX 17AAG	0.50 0.50	0.54	2	Vin ActD	0.50 0.50	0.12	0.42
1036	2	0	0.46	0	0	0	0.54	0	0	2	Vin ActD	0.50 0.50	0.12	2	CBL IRT	0.50 0.50	2.14	2.02	dnapk	2	DOX 17AAG	0.50 0.50	0.56	2	Vin ActD	0.50 0.50	0.12	0.44
1037	2	0	0.47	0	0	0	0.53	0	0	2	Vin ActD	0.50 0.50	0.12	2	CBL IRT	0.50 0.50	2.18	2.06	dnapk	2	DOX 17AAG	0.50 0.50	0.6	2	Vin ActD	0.50 0.50	0.12	0.48
1038	2	0	0.48	0	0	0	0.52	0	0	2	Vin ActD	0.50 0.50	0.12	2	CBL IRT	0.50 0.50	2.2	2.08	dnapk	2	DOX 17AAG	0.50 0.50	0.62	2	Vin ActD	0.50 0.50	0.12	0.5
1039	2	0	0.49	0	0	0	0.51	0	0	2	Vin ActD	0.50 0.50	0.12	2	CBL IRT	0.50 0.50	2.22	2.1	dnapk	2	DOX 17AAG	0.50 0.50	0.66	2	Vin ActD	0.50 0.50	0.12	0.54
1040	2	0	0.5	0	0	0	0.5	0	0	2	Vin ActD	0.50 0.50	0.12	2	CBL IRT	0.50 0.50	2.24	2.12	dnapk	2	DOX 17AAG	0.50 0.50	0.7	2	Vin ActD	0.50 0.50	0.12	0.58
1041	2	0	0.51	0	0	0	0.49	0	0	2	Vin ActD	0.50 0.50	0.12	2	CBL IRT	0.50 0.50	2.28	2.16	chk2	2	ActD Erlotinib	0.50 0.50	0.2	2	Vin ActD	0.50 0.50	0.12	0.08
1042	2	0	0.52	0	0	0	0.48	0	0	2	Vin ActD	0.50 0.50	0.12	2	CBL IRT	0.50 0.50	2.3	2.18	chk2	2	ActD Erlotinib	0.50 0.50	0.2	2	Vin ActD	0.50 0.50	0.12	0.08
1043	2	0	0.53	0	0	0	0.47	0	0	2	Vin ActD	0.50 0.50	0.12	2	CBL IRT	0.50 0.50	2.32	2.2	chk2	2	ActD Erlotinib	0.50 0.50	0.18	2	Vin ActD	0.50 0.50	0.12	0.06
1044	2	0	0.54	0	0	0	0.46	0	0	2	Vin ActD	0.50 0.50	0.14	2	CBL IRT	0.50 0.50	2.34	2.2	chk2	2	ActD Erlotinib	0.50 0.50	0.18	2	Vin ActD	0.50 0.50	0.14	0.04
1045	2	0	0.55	0	0	0	0.45	0	0	2	Vin ActD	0.50 0.50	0.14	2	CBL IRT	0.50 0.50	2.38	2.24	chk2	2	ActD Erlotinib	0.50 0.50	0.18	2	Vin ActD	0.50 0.50	0.14	0.04
1046	2	0	0.56	0	0	0	0.44	0	0	2	Vin ActD	0.50 0.50	0.14	2	CBL IRT	0.50 0.50	2.4	2.26	chk2	2	ActD Erlotinib	0.50 0.50	0.18	2	Vin ActD	0.50 0.50	0.14	0.04
1047	2	0	0.57	0	0	0	0.43	0	0	2	Vin ActD	0.50 0.50	0.14	2	CBL IRT	0.50 0.50	2.42	2.28	chk2	2	ActD Erlotinib	0.50 0.50	0.18	2	Vin ActD	0.50 0.50	0.14	0.04
1048	2	0	0.58	0	0	0	0.42	0	0	2	Vin ActD	0.50 0.50	0.14	2	CBL IRT	0.50 0.50	2.44	2.3	chk2	2	ActD Erlotinib	0.50 0.50	0.18	2	Vin ActD	0.50 0.50	0.14	0.04
1049	2	0	0.59	0	0	0	0.41	0	0	2	Vin ActD	0.50 0.50	0.14	2	CBL IRT	0.50 0.50	2.46	2.32	chk2	2	ActD Erlotinib	0.50 0.50	0.16	2	Vin ActD	0.50 0.50	0.14	0.02
1050	2	0	0.6	0	0	0	0.4	0	0	2	Vin ActD	0.50 0.50	0.14	2	CBL IRT	0.50 0.50	2.5	2.36	chk2	2	ActD Erlotinib	0.50 0.50	0.16	2	Vin ActD	0.50 0.50	0.14	0.02
1051	2	0	0.61	0	0	0	0.39	0	0	2	Vin ActD	0.50 0.50	0.14	2	CBL IRT	0.50 0.50	2.52	2.38	chk2	2	ActD Erlotinib	0.50 0.50	0.16	2	Vin ActD	0.50 0.50	0.14	0.02
1052	2	0	0.62	0	0	0	0.38	0	0	2	Vin ActD	0.50 0.50	0.14	2	CBL IRT	0.50 0.50	2.54	2.4	chk2	2	ActD Erlotinib	0.50 0.50	0.16	2	Vin ActD	0.50 0.50	0.14	0.02
1053	2	0	0.63	0	0	0	0.37	0	0	2	ActD Erlotinib	0.50 0.50	0.16	2	CBL IRT	0.50 0.50	2.56	2.4	chk2	2	ActD Erlotinib	0.50 0.50	0.16	2	ActD Erlotinib	0.50 0.50	0.16	0
1054	2	0	0.64	0	0	0	0.36	0	0	2	ActD Erlotinib	0.50 0.50	0.14	2	CBL IRT	0.50 0.50	2.6	2.46	chk2	2	ActD Erlotinib	0.50 0.50	0.14	2	ActD Erlotinib	0.50 0.50	0.14	0
1055	2	0	0.65	0	0	0	0.35	0	0	2	ActD Erlotinib	0.50 0.50	0.14	2	CBL IRT	0.50 0.50	2.62	2.48	chk2	2	ActD Erlotinib	0.50 0.50	0.14	2	ActD Erlotinib	0.50 0.50	0.14	0
1056	2	0	0.66	0	0	0	0.34	0	0	2	ActD Erlotinib	0.50 0.50	0.14	2	CBL IRT	0.50 0.50	2.64	2.5	chk2	2	ActD Erlotinib	0.50 0.50	0.14	2	ActD Erlotinib	0.50 0.50	0.14	0
1057	2	0	0.67	0	0	0	0.33	0	0	2	ActD Erlotinib	0.50 0.50	0.14	2	CBL IRT	0.50 0.50	2.66	2.52	chk2	2	ActD Erlotinib	0.50 0.50	0.14	2	ActD Erlotinib	0.50 0.50	0.14	0
1058	2	0	0.68	0	0	0	0.32	0	0	2	ActD Erlotinib	0.50 0.50	0.14	2	CBL IRT	0.50 0.50	2.68	2.54	chk2	2	ActD Erlotinib	0.50 0.50	0.14	2	ActD Erlotinib	0.50 0.50	0.14	0
1059	2	0	0.69	0	0	0	0.31	0	0	2	ActD Erlotinib	0.50 0.50	0.12	2	CBL IRT	0.50 0.50	2.72	2.6	chk2	2	ActD Erlotinib	0.50 0.50	0.12	2	ActD Erlotinib	0.50 0.50	0.12	0
1060	2	0	0.7	0	0	0	0.3	0	0	2	ActD Erlotinib	0.50 0.50	0.12	2	CBL IRT	0.50 0.50	2.74	2.62	chk2	2	ActD Erlotinib	0.50 0.50	0.12	2	ActD Erlotinib	0.50 0.50	0.12	0
1061	2	0	0.71	0	0	0	0.29	0	0	2	ActD Erlotinib	0.50 0.50	0.12	2	CBL IRT	0.50 0.50	2.76	2.64	chk2	2	ActD Erlotinib	0.50 0.50	0.12	2	ActD Erlotinib	0.50 0.50	0.12	0
1062	2	0	0.72	0	0	0	0.28	0	0	2	ActD Erlotinib	0.50 0.50	0.12	2	CBL IRT	0.50 0.50	2.78	2.66	chk2	2	ActD Erlotinib	0.50 0.50	0.12	2	ActD Erlotinib	0.50 0.50	0.12	0
1063	2	0	0.73	0	0	0	0.27	0	0	2	ActD Erlotinib	0.50 0.50	0.12	2	CBL IRT	0.50 0.50	2.82	2.7	chk2	2	ActD Erlotinib	0.50 0.50	0.12	2	ActD Erlotinib	0.50 0.50	0.12	0
1064	2	0	0.74	0	0	0	0.26	0	0	2	ActD Erlotinib	0.50 0.50	0.1	2	CBL IRT	0.50 0.50	2.84	2.74	chk2	2	ActD Erlotinib	0.50 0.50	0.1	2	ActD Erlotinib	0.50 0.50	0.1	0
1065	2	0	0.75	0	0	0	0.25	0	0	2	ActD Erlotinib	0.50 0.50	0.1	2	CBL IRT	0.50 0.50	2.86	2.76	chk2	2	ActD Erlotinib	0.50 0.50	0.1	2	ActD Erlotinib	0.50 0.50	0.1	0
1066	2	0	0.76	0	0	0	0.24	0	0	2	ActD Erlotinib	0.50 0.50	0.1	2	CBL IRT	0.50 0.50	2.88	2.78	chk2	2	ActD Erlotinib	0.50 0.50	0.1	2	ActD Erlotinib	0.50 0.50	0.1	0
1067	2	0	0.77	0	0	0	0.23	0	0	2	ActD Erlotinib	0.50 0.50	0.1	2	CBL IRT	0.50 0.50	2.92	2.82	chk2	2	ActD Erlotinib	0.50 0.50	0.1	2	ActD Erlotinib	0.50 0.50	0.1	0
1068	2	0	0.78	0	0	0	0.22	0	0	2	ActD Erlotinib	0.50 0.50	0.1	2	CBL IRT	0.50 0.50	2.94	2.84	chk2	2	ActD Erlotinib	0.50 0.50	0.1	2	ActD Erlotinib	0.50 0.50	0.1	0
1069	2	0	0.79	0	0	0	0.21	0	0	2	ActD Erlotinib	0.50 0.50	0.08	2	CBL IRT	0.50 0.50	2.96	2.88	chk2	2	ActD Erlotinib	0.50 0.50	0.08	2	ActD Erlotinib	0.50 0.50	0.08	0
1070	2	0	0.8	0	0	0	0.2	0	0	2	ActD Erlotinib	0.50 0.50	0.08	2	CBL IRT	0.50 0.50	2.98	2.9	chk2	2	ActD Erlotinib	0.50 0.50	0.08	2	ActD Erlotinib	0.50 0.50	0.08	0
1071	2	0	0.81	0	0	0	0.19	0	0	2	ActD Erlotinib	0.50 0.50	0.08	2	CBL IRT	0.50 0.50	3	2.92	chk2	2	ActD Erlotinib	0.50 0.50	0.08	2	ActD Erlotinib	0.50 0.50	0.08	0
1072	2	0	0.82	0	0	0	0.18	0	0	2	ActD Erlotinib	0.50 0.50	0.08	2	CBL IRT	0.50 0.50	3.04	2.96	chk2	2	ActD Erlotinib	0.50 0.50	0.08	2	ActD Erlotinib	0.50 0.50	0.08	0
1073	2	0	0.83	0	0	0	0.17	0	0	2	ActD Erlotinib	0.50 0.50	0.08	2	CBL IRT	0.50 0.50	3.06	2.98	chk2	2	ActD Erlotinib	0.50 0.50	0.08	2	ActD Erlotinib	0.50 0.50	0.08	0
1074	2	0	0.84	0	0	0	0.16	0	0	2	ActD Erlotinib	0.50 0.50	0.06	2	CBL IRT	0.50 0.50	3.08	3.02	chk2	2	ActD Erlotinib	0.50 0.50	0.06	2	ActD Erlotinib	0.50 0.50	0.06	0
1075	2	0	0.85	0	0	0	0.15	0	0	2	ActD Erlotinib	0.50 0.50	0.06	2	CBL IRT	0.50 0.50	3.1	3.04	chk2	2	ActD Erlotinib	0.50 0.50	0.06	2	ActD Erlotinib	0.50 0.50	0.06	0
1076	2	0	0.86	0	0	0	0.14	0	0	2	ActD Erlotinib	0.50 0.50	0.06	2	CBL IRT	0.50 0.50	3.14	3.08	chk2	2	ActD Erlotinib	0.50 0.50	0.06	2	ActD Erlotinib	0.50 0.50	0.06	0
1077	2	0	0.87	0	0	0	0.13	0	0	2	ActD Erlotinib	0.50 0.50	0.06	2	CBL IRT	0.50 0.50	3.16	3.1	chk2	2	ActD Erlotinib	0.50 0.50	0.06	2	ActD Erlotinib	0.50 0.50	0.06	0
1078	2	0	0.88	0	0	0	0.12	0	0	2	ActD Erlotinib	0.50 0.50	0.06	2	CBL IRT	0.50 0.50	3.18	3.12	chk2	2	ActD Erlotinib	0.50 0.50	0.06	2	ActD Erlotinib	0.50 0.50	0.06	0
1079	2	0	0.89	0	0	0	0.11	0	0	2	ActD Erlotinib	0.50 0.50	0.04	2	CBL IRT	0.50 0.50	3.2	3.16	chk2	2	ActD Erlotinib	0.50 0.50	0.04	2	ActD Erlotinib	0.50 0.50	0.04	0
1080	2	0	0.9	0	0	0	0.1	0	0	2	ActD Erlotinib	0.50 0.50	0.04	2	CBL IRT	0.50 0.50	3.22	3.18	chk2	2	ActD Erlotinib	0.50 0.50	0.04	2	ActD Erlotinib	0.50 0.50	0.04	0
1081	2	0	0.91	0	0	0	0.09	0	0	2	ActD Erlotinib	0.50 0.50	0.04	2	CBL IRT	0.50 0.50	3.26	3.22	chk2	2	ActD Erlotinib	0.50 0.50	0.04	2	ActD Erlotinib	0.50 0.50	0.04	0
1082	2	0	0.92	0	0	0	0.08	0	0	2	ActD Erlotinib	0.50 0.50	0.04	2	CBL IRT	0.50 0.50	3.28	3.24	chk2	2	ActD Erlotinib	0.50 0.50	0.04	2	ActD Erlotinib	0.50 0.50	0.04	0
1083	2	0	0.93	0	0	0	0.07	0	0	2	ActD Erlotinib	0.50 0.50	0.04	2	CBL IRT	0.50 0.50	3.3	3.26	chk2	2	ActD Erlotinib	0.50 0.50	0.04	2	ActD Erlotinib	0.50 0.50	0.04	0
1084	2	0	0.94	0	0	0	0.06	0	0	2	ActD Erlotinib	0.50 0.50	0.02	2	CBL IRT	0.50 0.50	3.32	3.3	chk2	2	ActD Erlotinib	0.50 0.50	0.02	2	ActD Erlotinib	0.50 0.50	0.02	0
1085	2	0	0.95	0	0	0	0.05	0	0	2	ActD Erlotinib	0.50 0.50	0.02	2	CBL IRT	0.50 0.50	3.36	3.34	chk2	2	ActD Erlotinib	0.50 0.50	0.02	2	ActD Erlotinib	0.50 0.50	0.02	0
1086	2	0	0.96	0	0	0	0.04	0	0	2	ActD Erlotinib	0.50 0.50	0.02	2	CBL IRT	0.50 0.50	3.38	3.36	chk2	2	ActD Erlotinib	0.50 0.50	0.02	2	ActD Erlotinib	0.50 0.50	0.02	0
1087	2	0	0.97	0	0	0	0.03	0	0	2	ActD Erlotinib	0.50 0.50	0.02	2	CBL IRT	0.50 0.50	3.4	3.38	chk2	2	ActD Erlotinib	0.50 0.50	0.02	2	ActD Erlotinib	0.50 0.50	0.02	0
1088	2	0	0.98	0	0	0	0.02	0	0	2	ActD Erlotinib	0.50 0.50	0.02	2	CBL IRT	0.50 0.50	3.42	3.4	chk2	2	ActD Erlotinib	0.50 0.50	0.02	2	ActD Erlotinib	0.50 0.50	0.02	0
1089	2	0	0.99	0	0	0	0.01	0	0	2	ActD Erlotinib	0.50 0.50	0	2	CBL IRT	0.50 0.50	3.46	3.46	chk2	2	ActD Erlotinib	0.50 0.50	0	2	ActD Erlotinib	0.50 0.50	0	0
1090	2	0	0.01	0	0	0	0	0.99	0	2	CBL Vin	0.50 0.50	-1.42	2	5FU Erlotinib	0.50 0.50	1.46	2.88	bok	2	CBL Vin	0.50 0.50	-1.42	2	CBL Vin	0.50 0.50	-1.42	0
1091	2	0	0.02	0	0	0	0	0.98	0	2	CBL Vin	0.50 0.50	-1.38	2	5FU Erlotinib	0.50 0.50	1.44	2.82	bok	2	CBL Vin	0.50 0.50	-1.38	2	CBL Vin	0.50 0.50	-1.38	0
1092	2	0	0.03	0	0	0	0	0.97	0	2	Vin SAHA	0.50 0.50	-1.36	2	5FU Erlotinib	0.50 0.50	1.44	2.8	bok	2	CBL Vin	0.50 0.50	-1.36	2	Vin SAHA	0.50 0.50	-1.36	0
1093	2	0	0.04	0	0	0	0	0.96	0	2	Vin SAHA	0.50 0.50	-1.34	2	5FU Erlotinib	0.50 0.50	1.44	2.78	bok	2	CBL Vin	0.50 0.50	-1.32	2	Vin SAHA	0.50 0.50	-1.34	0.02
1094	2	0	0.05	0	0	0	0	0.95	0	2	Vin SAHA	0.50 0.50	-1.32	2	5FU Erlotinib	0.50 0.50	1.42	2.74	bok	2	CBL Vin	0.50 0.50	-1.28	2	Vin SAHA	0.50 0.50	-1.32	0.04
1095	2	0	0.06	0	0	0	0	0.94	0	2	Vin SAHA	0.50 0.50	-1.3	2	5FU Erlotinib	0.50 0.50	1.42	2.72	bok	2	CBL Vin	0.50 0.50	-1.24	2	Vin SAHA	0.50 0.50	-1.3	0.06
1096	2	0	0.07	0	0	0	0	0.93	0	2	Vin SAHA	0.50 0.50	-1.28	2	5FU Erlotinib	0.50 0.50	1.4	2.68	bok	2	CBL Vin	0.50 0.50	-1.22	2	Vin SAHA	0.50 0.50	-1.28	0.06
1097	2	0	0.08	0	0	0	0	0.92	0	2	Vin SAHA	0.50 0.50	-1.26	2	5FU Erlotinib	0.50 0.50	1.4	2.66	bok	2	CBL Vin	0.50 0.50	-1.18	2	Vin SAHA	0.50 0.50	-1.26	0.08
1098	2	0	0.09	0	0	0	0	0.91	0	2	Vin SAHA	0.50 0.50	-1.26	2	5FU Erlotinib	0.50 0.50	1.38	2.64	bok	2	CBL Vin	0.50 0.50	-1.14	2	Vin SAHA	0.50 0.50	-1.26	0.12
1099	2	0	0.1	0	0	0	0	0.9	0	2	Vin SAHA	0.50 0.50	-1.24	2	5FU Erlotinib	0.50 0.50	1.38	2.62	bok	2	CBL Vin	0.50 0.50	-1.1	2	Vin SAHA	0.50 0.50	-1.24	0.14
1100	2	0	0.11	0	0	0	0	0.89	0	2	Vin SAHA	0.50 0.50	-1.22	2	5FU Erlotinib	0.50 0.50	1.36	2.58	bok	2	CBL Vin	0.50 0.50	-1.08	2	Vin SAHA	0.50 0.50	-1.22	0.14
1101	2	0	0.12	0	0	0	0	0.88	0	2	Vin SAHA	0.50 0.50	-1.2	2	5FU Erlotinib	0.50 0.50	1.36	2.56	bok	2	CBL Vin	0.50 0.50	-1.04	2	Vin SAHA	0.50 0.50	-1.2	0.16
1102	2	0	0.13	0	0	0	0	0.87	0	2	Vin SAHA	0.50 0.50	-1.18	2	5FU Erlotinib	0.50 0.50	1.34	2.52	bok	2	CBL Vin	0.50 0.50	-1	2	Vin SAHA	0.50 0.50	-1.18	0.18
1103	2	0	0.14	0	0	0	0	0.86	0	2	Vin SAHA	0.50 0.50	-1.16	2	5FU Erlotinib	0.50 0.50	1.34	2.5	bok	2	CBL Vin	0.50 0.50	-0.96	2	Vin SAHA	0.50 0.50	-1.16	0.2
1104	2	0	0.15	0	0	0	0	0.85	0	2	Vin SAHA	0.50 0.50	-1.14	2	5FU Erlotinib	0.50 0.50	1.32	2.46	bok	2	CBL Vin	0.50 0.50	-0.94	2	Vin SAHA	0.50 0.50	-1.14	0.2
1105	2	0	0.16	0	0	0	0	0.84	0	2	Vin SAHA	0.50 0.50	-1.12	2	5FU Erlotinib	0.50 0.50	1.32	2.44	bok	2	CBL Vin	0.50 0.50	-0.9	2	Vin SAHA	0.50 0.50	-1.12	0.22
1106	2	0	0.17	0	0	0	0	0.83	0	2	Vin SAHA	0.50 0.50	-1.1	2	5FU Erlotinib	0.50 0.50	1.3	2.4	bok	2	CBL Vin	0.50 0.50	-0.86	2	Vin SAHA	0.50 0.50	-1.1	0.24
1107	2	0	0.18	0	0	0	0	0.82	0	2	Vin SAHA	0.50 0.50	-1.08	2	5FU Erlotinib	0.50 0.50	1.3	2.38	bok	2	CBL Vin	0.50 0.50	-0.82	2	Vin SAHA	0.50 0.50	-1.08	0.26
1108	2	0	0.19	0	0	0	0	0.81	0	2	Vin SAHA	0.50 0.50	-1.06	2	5FU Erlotinib	0.50 0.50	1.28	2.34	bok	2	CBL Vin	0.50 0.50	-0.8	2	Vin SAHA	0.50 0.50	-1.06	0.26
1109	2	0	0.2	0	0	0	0	0.8	0	2	Vin SAHA	0.50 0.50	-1.06	2	5FU Erlotinib	0.50 0.50	1.28	2.34	bok	2	CBL Vin	0.50 0.50	-0.76	2	Vin SAHA	0.50 0.50	-1.06	0.3
1110	2	0	0.21	0	0	0	0	0.79	0	2	Vin SAHA	0.50 0.50	-1.04	2	5FU Erlotinib	0.50 0.50	1.28	2.32	bok	2	CBL Vin	0.50 0.50	-0.72	2	Vin SAHA	0.50 0.50	-1.04	0.32
1111	2	0	0.22	0	0	0	0	0.78	0	2	Vin SAHA	0.50 0.50	-1.02	2	5FU Erlotinib	0.50 0.50	1.26	2.28	bok	2	CBL Vin	0.50 0.50	-0.68	2	Vin SAHA	0.50 0.50	-1.02	0.34
1112	2	0	0.23	0	0	0	0	0.77	0	2	Vin SAHA	0.50 0.50	-1	2	5FU Erlotinib	0.50 0.50	1.26	2.26	bok	2	CBL Vin	0.50 0.50	-0.66	2	Vin SAHA	0.50 0.50	-1	0.34
1113	2	0	0.24	0	0	0	0	0.76	0	2	Vin SAHA	0.50 0.50	-0.98	2	5FU Erlotinib	0.50 0.50	1.24	2.22	bok	2	CBL Vin	0.50 0.50	-0.62	2	Vin SAHA	0.50 0.50	-0.98	0.36
1114	2	0	0.25	0	0	0	0	0.75	0	2	Vin SAHA	0.50 0.50	-0.96	2	5FU Erlotinib	0.50 0.50	1.24	2.2	bok	2	CBL Vin	0.50 0.50	-0.58	2	Vin SAHA	0.50 0.50	-0.96	0.38
1115	2	0	0.26	0	0	0	0	0.74	0	2	Vin SAHA	0.50 0.50	-0.94	2	5FU Erlotinib	0.50 0.50	1.22	2.16	bok	2	CBL Vin	0.50 0.50	-0.54	2	Vin SAHA	0.50 0.50	-0.94	0.4
1116	2	0	0.27	0	0	0	0	0.73	0	2	Vin SAHA	0.50 0.50	-0.92	2	5FU Erlotinib	0.50 0.50	1.22	2.14	bok	2	CBL Vin	0.50 0.50	-0.52	2	Vin SAHA	0.50 0.50	-0.92	0.4
1117	2	0	0.28	0	0	0	0	0.72	0	2	Vin SAHA	0.50 0.50	-0.9	2	5FU Erlotinib	0.50 0.50	1.2	2.1	bok	2	CBL Vin	0.50 0.50	-0.48	2	Vin SAHA	0.50 0.50	-0.9	0.42
1118	2	0	0.29	0	0	0	0	0.71	0	2	Vin SAHA	0.50 0.50	-0.88	2	5FU Erlotinib	0.50 0.50	1.2	2.08	bok	2	CBL Vin	0.50 0.50	-0.44	2	Vin SAHA	0.50 0.50	-0.88	0.44
1119	2	0	0.3	0	0	0	0	0.7	0	2	Vin SAHA	0.50 0.50	-0.86	2	5FU Erlotinib	0.50 0.50	1.18	2.04	bok	2	CBL Vin	0.50 0.50	-0.4	2	Vin SAHA	0.50 0.50	-0.86	0.46
1120	2	0	0.31	0	0	0	0	0.69	0	2	Vin SAHA	0.50 0.50	-0.86	2	5FU Erlotinib	0.50 0.50	1.18	2.04	bok	2	CBL Vin	0.50 0.50	-0.38	2	Vin SAHA	0.50 0.50	-0.86	0.48
1121	2	0	0.32	0	0	0	0	0.68	0	2	Vin SAHA	0.50 0.50	-0.84	2	5FU Erlotinib	0.50 0.50	1.16	2	bok	2	CBL Vin	0.50 0.50	-0.34	2	Vin SAHA	0.50 0.50	-0.84	0.5
1122	2	0	0.33	0	0	0	0	0.67	0	2	Vin SAHA	0.50 0.50	-0.82	2	5FU Erlotinib	0.50 0.50	1.16	1.98	bok	2	CBL Vin	0.50 0.50	-0.3	2	Vin SAHA	0.50 0.50	-0.82	0.52
1123	2	0	0.34	0	0	0	0	0.66	0	2	Vin SAHA	0.50 0.50	-0.8	2	5FU Erlotinib	0.50 0.50	1.14	1.94	bok	2	CBL Vin	0.50 0.50	-0.26	2	Vin SAHA	0.50 0.50	-0.8	0.54
1124	2	0	0.35	0	0	0	0	0.65	0	2	Vin SAHA	0.50 0.50	-0.78	2	CBL 5FU	0.50 0.50	1.14	1.92	bok	2	CBL Vin	0.50 0.50	-0.24	2	Vin SAHA	0.50 0.50	-0.78	0.54
1125	2	0	0.36	0	0	0	0	0.64	0	2	Vin SAHA	0.50 0.50	-0.76	2	CBL 5FU	0.50 0.50	1.16	1.92	bok	2	CBL Vin	0.50 0.50	-0.2	2	Vin SAHA	0.50 0.50	-0.76	0.56
1126	2	0	0.37	0	0	0	0	0.63	0	2	Vin SAHA	0.50 0.50	-0.74	2	CBL 5FU	0.50 0.50	1.18	1.92	bok	2	CBL Vin	0.50 0.50	-0.16	2	Vin SAHA	0.50 0.50	-0.74	0.58
1127	2	0	0.38	0	0	0	0	0.62	0	2	Vin SAHA	0.50 0.50	-0.72	2	CBL 5FU	0.50 0.50	1.2	1.92	bok	2	CBL Vin	0.50 0.50	-0.12	2	Vin SAHA	0.50 0.50	-0.72	0.6
1128	2	0	0.39	0	0	0	0	0.61	0	2	Vin SAHA	0.50 0.50	-0.7	2	CBL 5FU	0.50 0.50	1.22	1.92	bok	2	CBL Vin	0.50 0.50	-0.1	2	Vin SAHA	0.50 0.50	-0.7	0.6
1129	2	0	0.4	0	0	0	0	0.6	0	2	Vin SAHA	0.50 0.50	-0.68	2	CBL 5FU	0.50 0.50	1.24	1.92	bok	2	CBL Vin	0.50 0.50	-0.06	2	Vin SAHA	0.50 0.50	-0.68	0.62
1130	2	0	0.41	0	0	0	0	0.59	0	2	Vin SAHA	0.50 0.50	-0.66	2	CBL 5FU	0.50 0.50	1.26	1.92	bok	2	CBL Vin	0.50 0.50	-0.02	2	Vin SAHA	0.50 0.50	-0.66	0.64
1131	2	0	0.42	0	0	0	0	0.58	0	2	Vin SAHA	0.50 0.50	-0.66	2	CBL 5FU	0.50 0.50	1.28	1.94	bok	2	CBL Vin	0.50 0.50	0	2	Vin SAHA	0.50 0.50	-0.66	0.66
1132	2	0	0.43	0	0	0	0	0.57	0	2	Vin SAHA	0.50 0.50	-0.64	2	CBL 5FU	0.50 0.50	1.3	1.94	bok	2	CBL Vin	0.50 0.50	0.04	2	Vin SAHA	0.50 0.50	-0.64	0.68
1133	2	0	0.44	0	0	0	0	0.56	0	2	Vin SAHA	0.50 0.50	-0.62	2	CBL 5FU	0.50 0.50	1.3	1.92	bok	2	CBL Vin	0.50 0.50	0.08	2	Vin SAHA	0.50 0.50	-0.62	0.7
1134	2	0	0.45	0	0	0	0	0.55	0	2	Vin SAHA	0.50 0.50	-0.6	2	CBL 5FU	0.50 0.50	1.32	1.92	bok	2	CBL Vin	0.50 0.50	0.12	2	Vin SAHA	0.50 0.50	-0.6	0.72
1135	2	0	0.46	0	0	0	0	0.54	0	2	Vin SAHA	0.50 0.50	-0.58	2	CBL 5FU	0.50 0.50	1.34	1.92	bok	2	CBL Vin	0.50 0.50	0.14	2	Vin SAHA	0.50 0.50	-0.58	0.72
1136	2	0	0.47	0	0	0	0	0.53	0	2	Vin SAHA	0.50 0.50	-0.56	2	CBL 5FU	0.50 0.50	1.36	1.92	bok	2	CBL Vin	0.50 0.50	0.18	2	Vin SAHA	0.50 0.50	-0.56	0.74
1137	2	0	0.48	0	0	0	0	0.52	0	2	Vin SAHA	0.50 0.50	-0.54	2	CBL 5FU	0.50 0.50	1.38	1.92	bok	2	CBL Vin	0.50 0.50	0.22	2	Vin SAHA	0.50 0.50	-0.54	0.76
1138	2	0	0.49	0	0	0	0	0.51	0	2	Vin SAHA	0.50 0.50	-0.52	2	CBL 5FU	0.50 0.50	1.4	1.92	bok	2	CBL Vin	0.50 0.50	0.26	2	Vin SAHA	0.50 0.50	-0.52	0.78
1139	2	0	0.5	0	0	0	0	0.5	0	2	Vin SAHA	0.50 0.50	-0.5	2	CBL IRT	0.50 0.50	1.42	1.92	bok	2	CBL Vin	0.50 0.50	0.28	2	Vin SAHA	0.50 0.50	-0.5	0.78
1140	2	0	0.51	0	0	0	0	0.49	0	2	Vin SAHA	0.50 0.50	-0.48	2	CBL IRT	0.50 0.50	1.46	1.94	chk2	2	ActD Erlotinib	0.50 0.50	0.3	2	Vin SAHA	0.50 0.50	-0.48	0.78
1141	2	0	0.52	0	0	0	0	0.48	0	2	Vin SAHA	0.50 0.50	-0.46	2	CBL IRT	0.50 0.50	1.5	1.96	chk2	2	ActD Erlotinib	0.50 0.50	0.28	2	Vin SAHA	0.50 0.50	-0.46	0.74
1142	2	0	0.53	0	0	0	0	0.47	0	2	Vin SAHA	0.50 0.50	-0.46	2	CBL IRT	0.50 0.50	1.54	2	chk2	2	ActD Erlotinib	0.50 0.50	0.28	2	Vin SAHA	0.50 0.50	-0.46	0.74
1143	2	0	0.54	0	0	0	0	0.46	0	2	Vin SAHA	0.50 0.50	-0.44	2	CBL IRT	0.50 0.50	1.58	2.02	chk2	2	ActD Erlotinib	0.50 0.50	0.28	2	Vin SAHA	0.50 0.50	-0.44	0.72
1144	2	0	0.55	0	0	0	0	0.45	0	2	Vin SAHA	0.50 0.50	-0.42	2	CBL IRT	0.50 0.50	1.62	2.04	chk2	2	ActD Erlotinib	0.50 0.50	0.26	2	Vin SAHA	0.50 0.50	-0.42	0.68
1145	2	0	0.56	0	0	0	0	0.44	0	2	Vin SAHA	0.50 0.50	-0.4	2	CBL IRT	0.50 0.50	1.66	2.06	chk2	2	ActD Erlotinib	0.50 0.50	0.26	2	Vin SAHA	0.50 0.50	-0.4	0.66
1146	2	0	0.57	0	0	0	0	0.43	0	2	Vin SAHA	0.50 0.50	-0.38	2	CBL IRT	0.50 0.50	1.7	2.08	chk2	2	ActD Erlotinib	0.50 0.50	0.26	2	Vin SAHA	0.50 0.50	-0.38	0.64
1147	2	0	0.58	0	0	0	0	0.42	0	2	Vin SAHA	0.50 0.50	-0.36	2	CBL IRT	0.50 0.50	1.74	2.1	chk2	2	ActD Erlotinib	0.50 0.50	0.26	2	Vin SAHA	0.50 0.50	-0.36	0.62
1148	2	0	0.59	0	0	0	0	0.41	0	2	Vin SAHA	0.50 0.50	-0.34	2	CBL IRT	0.50 0.50	1.78	2.12	chk2	2	ActD Erlotinib	0.50 0.50	0.24	2	Vin SAHA	0.50 0.50	-0.34	0.58
1149	2	0	0.6	0	0	0	0	0.4	0	2	Vin SAHA	0.50 0.50	-0.32	2	CBL IRT	0.50 0.50	1.84	2.16	chk2	2	ActD Erlotinib	0.50 0.50	0.24	2	Vin SAHA	0.50 0.50	-0.32	0.56
1150	2	0	0.61	0	0	0	0	0.39	0	2	Vin ActD	0.50 0.50	-0.3	2	CBL IRT	0.50 0.50	1.88	2.18	chk2	2	ActD Erlotinib	0.50 0.50	0.24	2	Vin ActD	0.50 0.50	-0.3	0.54
1151	2	0	0.62	0	0	0	0	0.38	0	2	Vin ActD	0.50 0.50	-0.3	2	CBL IRT	0.50 0.50	1.92	2.22	chk2	2	ActD Erlotinib	0.50 0.50	0.22	2	Vin ActD	0.50 0.50	-0.3	0.52
1152	2	0	0.63	0	0	0	0	0.37	0	2	Vin ActD	0.50 0.50	-0.28	2	CBL IRT	0.50 0.50	1.96	2.24	chk2	2	ActD Erlotinib	0.50 0.50	0.22	2	Vin ActD	0.50 0.50	-0.28	0.5
1153	2	0	0.64	0	0	0	0	0.36	0	2	Vin ActD	0.50 0.50	-0.26	2	CBL IRT	0.50 0.50	2	2.26	chk2	2	ActD Erlotinib	0.50 0.50	0.22	2	Vin ActD	0.50 0.50	-0.26	0.48
1154	2	0	0.65	0	0	0	0	0.35	0	2	Vin ActD	0.50 0.50	-0.26	2	CBL IRT	0.50 0.50	2.04	2.3	chk2	2	ActD Erlotinib	0.50 0.50	0.2	2	Vin ActD	0.50 0.50	-0.26	0.46
1155	2	0	0.66	0	0	0	0	0.34	0	2	Vin ActD	0.50 0.50	-0.24	2	CBL IRT	0.50 0.50	2.08	2.32	chk2	2	ActD Erlotinib	0.50 0.50	0.2	2	Vin ActD	0.50 0.50	-0.24	0.44
1156	2	0	0.67	0	0	0	0	0.33	0	2	Vin ActD	0.50 0.50	-0.22	2	CBL IRT	0.50 0.50	2.12	2.34	chk2	2	ActD Erlotinib	0.50 0.50	0.2	2	Vin ActD	0.50 0.50	-0.22	0.42
1157	2	0	0.68	0	0	0	0	0.32	0	2	Vin ActD	0.50 0.50	-0.2	2	CBL IRT	0.50 0.50	2.16	2.36	chk2	2	ActD Erlotinib	0.50 0.50	0.2	2	Vin ActD	0.50 0.50	-0.2	0.4
1158	2	0	0.69	0	0	0	0	0.31	0	2	Vin ActD	0.50 0.50	-0.2	2	CBL IRT	0.50 0.50	2.2	2.4	chk2	2	ActD Erlotinib	0.50 0.50	0.18	2	Vin ActD	0.50 0.50	-0.2	0.38
1159	2	0	0.7	0	0	0	0	0.3	0	2	Vin ActD	0.50 0.50	-0.18	2	CBL IRT	0.50 0.50	2.24	2.42	chk2	2	ActD Erlotinib	0.50 0.50	0.18	2	Vin ActD	0.50 0.50	-0.18	0.36
1160	2	0	0.71	0	0	0	0	0.29	0	2	Vin ActD	0.50 0.50	-0.16	2	CBL IRT	0.50 0.50	2.28	2.44	chk2	2	ActD Erlotinib	0.50 0.50	0.18	2	Vin ActD	0.50 0.50	-0.16	0.34
1161	2	0	0.72	0	0	0	0	0.28	0	2	Vin ActD	0.50 0.50	-0.16	2	CBL IRT	0.50 0.50	2.32	2.48	chk2	2	ActD Erlotinib	0.50 0.50	0.16	2	Vin ActD	0.50 0.50	-0.16	0.32
1162	2	0	0.73	0	0	0	0	0.27	0	2	Vin ActD	0.50 0.50	-0.14	2	CBL IRT	0.50 0.50	2.36	2.5	chk2	2	ActD Erlotinib	0.50 0.50	0.16	2	Vin ActD	0.50 0.50	-0.14	0.3
1163	2	0	0.74	0	0	0	0	0.26	0	2	Vin ActD	0.50 0.50	-0.12	2	CBL IRT	0.50 0.50	2.4	2.52	chk2	2	ActD Erlotinib	0.50 0.50	0.16	2	Vin ActD	0.50 0.50	-0.12	0.28
1164	2	0	0.75	0	0	0	0	0.25	0	2	Vin ActD	0.50 0.50	-0.12	2	CBL IRT	0.50 0.50	2.44	2.56	chk2	2	ActD Erlotinib	0.50 0.50	0.16	2	Vin ActD	0.50 0.50	-0.12	0.28
1165	2	0	0.76	0	0	0	0	0.24	0	2	Vin ActD	0.50 0.50	-0.1	2	CBL IRT	0.50 0.50	2.48	2.58	chk2	2	ActD Erlotinib	0.50 0.50	0.14	2	Vin ActD	0.50 0.50	-0.1	0.24
1166	2	0	0.77	0	0	0	0	0.23	0	2	Vin ActD	0.50 0.50	-0.08	2	CBL IRT	0.50 0.50	2.52	2.6	chk2	2	ActD Erlotinib	0.50 0.50	0.14	2	Vin ActD	0.50 0.50	-0.08	0.22
1167	2	0	0.78	0	0	0	0	0.22	0	2	Vin ActD	0.50 0.50	-0.08	2	CBL IRT	0.50 0.50	2.58	2.66	chk2	2	ActD Erlotinib	0.50 0.50	0.14	2	Vin ActD	0.50 0.50	-0.08	0.22
1168	2	0	0.79	0	0	0	0	0.21	0	2	Vin ActD	0.50 0.50	-0.06	2	CBL IRT	0.50 0.50	2.62	2.68	chk2	2	ActD Erlotinib	0.50 0.50	0.12	2	Vin ActD	0.50 0.50	-0.06	0.18
1169	2	0	0.8	0	0	0	0	0.2	0	2	Vin ActD	0.50 0.50	-0.04	2	CBL IRT	0.50 0.50	2.66	2.7	chk2	2	ActD Erlotinib	0.50 0.50	0.12	2	Vin ActD	0.50 0.50	-0.04	0.16
1170	2	0	0.81	0	0	0	0	0.19	0	2	Vin ActD	0.50 0.50	-0.04	2	CBL IRT	0.50 0.50	2.7	2.74	chk2	2	ActD Erlotinib	0.50 0.50	0.12	2	Vin ActD	0.50 0.50	-0.04	0.16
1171	2	0	0.82	0	0	0	0	0.18	0	2	Vin ActD	0.50 0.50	-0.02	2	CBL IRT	0.50 0.50	2.74	2.76	chk2	2	ActD Erlotinib	0.50 0.50	0.1	2	Vin ActD	0.50 0.50	-0.02	0.12
1172	2	0	0.83	0	0	0	0	0.17	0	2	Vin ActD	0.50 0.50	0	2	CBL IRT	0.50 0.50	2.78	2.78	chk2	2	ActD Erlotinib	0.50 0.50	0.1	2	Vin ActD	0.50 0.50	0	0.1
1173	2	0	0.84	0	0	0	0	0.16	0	2	Vin ActD	0.50 0.50	0.02	2	CBL IRT	0.50 0.50	2.82	2.8	chk2	2	ActD Erlotinib	0.50 0.50	0.1	2	Vin ActD	0.50 0.50	0.02	0.08
1174	2	0	0.85	0	0	0	0	0.15	0	2	Vin ActD	0.50 0.50	0.02	2	CBL IRT	0.50 0.50	2.86	2.84	chk2	2	ActD Erlotinib	0.50 0.50	0.1	2	Vin ActD	0.50 0.50	0.02	0.08
1175	2	0	0.86	0	0	0	0	0.14	0	2	Vin ActD	0.50 0.50	0.04	2	CBL IRT	0.50 0.50	2.9	2.86	chk2	2	ActD Erlotinib	0.50 0.50	0.08	2	Vin ActD	0.50 0.50	0.04	0.04
1176	2	0	0.87	0	0	0	0	0.13	0	2	Vin ActD	0.50 0.50	0.06	2	CBL IRT	0.50 0.50	2.94	2.88	chk2	2	ActD Erlotinib	0.50 0.50	0.08	2	Vin ActD	0.50 0.50	0.06	0.02
1177	2	0	0.88	0	0	0	0	0.12	0	2	Vin ActD	0.50 0.50	0.06	2	CBL IRT	0.50 0.50	2.98	2.92	chk2	2	ActD Erlotinib	0.50 0.50	0.08	2	Vin ActD	0.50 0.50	0.06	0.02
1178	2	0	0.89	0	0	0	0	0.11	0	2	ActD Erlotinib	0.50 0.50	0.06	2	CBL IRT	0.50 0.50	3.02	2.96	chk2	2	ActD Erlotinib	0.50 0.50	0.06	2	ActD Erlotinib	0.50 0.50	0.06	0
1179	2	0	0.9	0	0	0	0	0.1	0	2	ActD Erlotinib	0.50 0.50	0.06	2	CBL IRT	0.50 0.50	3.06	3	chk2	2	ActD Erlotinib	0.50 0.50	0.06	2	ActD Erlotinib	0.50 0.50	0.06	0
1180	2	0	0.91	0	0	0	0	0.09	0	2	ActD Erlotinib	0.50 0.50	0.06	2	CBL IRT	0.50 0.50	3.1	3.04	chk2	2	ActD Erlotinib	0.50 0.50	0.06	2	ActD Erlotinib	0.50 0.50	0.06	0
1181	2	0	0.92	0	0	0	0	0.08	0	2	ActD Erlotinib	0.50 0.50	0.06	2	CBL IRT	0.50 0.50	3.14	3.08	chk2	2	ActD Erlotinib	0.50 0.50	0.06	2	ActD Erlotinib	0.50 0.50	0.06	0
1182	2	0	0.93	0	0	0	0	0.07	0	2	ActD Erlotinib	0.50 0.50	0.04	2	CBL IRT	0.50 0.50	3.18	3.14	chk2	2	ActD Erlotinib	0.50 0.50	0.04	2	ActD Erlotinib	0.50 0.50	0.04	0
1183	2	0	0.94	0	0	0	0	0.06	0	2	ActD Erlotinib	0.50 0.50	0.04	2	CBL IRT	0.50 0.50	3.22	3.18	chk2	2	ActD Erlotinib	0.50 0.50	0.04	2	ActD Erlotinib	0.50 0.50	0.04	0
1184	2	0	0.95	0	0	0	0	0.05	0	2	ActD Erlotinib	0.50 0.50	0.04	2	CBL IRT	0.50 0.50	3.26	3.22	chk2	2	ActD Erlotinib	0.50 0.50	0.04	2	ActD Erlotinib	0.50 0.50	0.04	0
1185	2	0	0.96	0	0	0	0	0.04	0	2	ActD Erlotinib	0.50 0.50	0.02	2	CBL IRT	0.50 0.50	3.32	3.3	chk2	2	ActD Erlotinib	0.50 0.50	0.02	2	ActD Erlotinib	0.50 0.50	0.02	0
1186	2	0	0.97	0	0	0	0	0.03	0	2	ActD Erlotinib	0.50 0.50	0.02	2	CBL IRT	0.50 0.50	3.36	3.34	chk2	2	ActD Erlotinib	0.50 0.50	0.02	2	ActD Erlotinib	0.50 0.50	0.02	0
1187	2	0	0.98	0	0	0	0	0.02	0	2	ActD Erlotinib	0.50 0.50	0.02	2	CBL IRT	0.50 0.50	3.4	3.38	chk2	2	ActD Erlotinib	0.50 0.50	0.02	2	ActD Erlotinib	0.50 0.50	0.02	0
1188	2	0	0.99	0	0	0	0	0.01	0	2	ActD Erlotinib	0.50 0.50	0	2	CBL IRT	0.50 0.50	3.44	3.44	chk2	2	ActD Erlotinib	0.50 0.50	0	2	ActD Erlotinib	0.50 0.50	0	0
1189	2	0	0.01	0	0	0	0	0	0.99	2	Vin ActD	0.50 0.50	0.36	2	Erlotinib SAHA	0.50 0.50	2.74	2.38	bim	2	CBL Vin	0.50 0.50	0.36	2	Vin ActD	0.50 0.50	0.36	0
1190	2	0	0.02	0	0	0	0	0	0.98	2	Vin ActD	0.50 0.50	0.36	2	Erlotinib SAHA	0.50 0.50	2.72	2.36	bim	2	CBL Vin	0.50 0.50	0.38	2	Vin ActD	0.50 0.50	0.36	0.02
1191	2	0	0.03	0	0	0	0	0	0.97	2	Vin ActD	0.50 0.50	0.36	2	Erlotinib SAHA	0.50 0.50	2.7	2.34	bim	2	CBL Vin	0.50 0.50	0.4	2	Vin ActD	0.50 0.50	0.36	0.04
1192	2	0	0.04	0	0	0	0	0	0.96	2	Vin ActD	0.50 0.50	0.36	2	Erlotinib SAHA	0.50 0.50	2.66	2.3	bim	2	CBL Vin	0.50 0.50	0.42	2	Vin ActD	0.50 0.50	0.36	0.06
1193	2	0	0.05	0	0	0	0	0	0.95	2	Vin ActD	0.50 0.50	0.34	2	Erlotinib SAHA	0.50 0.50	2.64	2.3	bim	2	CBL Vin	0.50 0.50	0.42	2	Vin ActD	0.50 0.50	0.34	0.08
1194	2	0	0.06	0	0	0	0	0	0.94	2	Vin ActD	0.50 0.50	0.34	2	Erlotinib SAHA	0.50 0.50	2.62	2.28	bim	2	CBL Vin	0.50 0.50	0.44	2	Vin ActD	0.50 0.50	0.34	0.1
1195	2	0	0.07	0	0	0	0	0	0.93	2	Vin ActD	0.50 0.50	0.34	2	Erlotinib SAHA	0.50 0.50	2.58	2.24	bim	2	CBL Vin	0.50 0.50	0.46	2	Vin ActD	0.50 0.50	0.34	0.12
1196	2	0	0.08	0	0	0	0	0	0.92	2	Vin ActD	0.50 0.50	0.34	2	Erlotinib SAHA	0.50 0.50	2.56	2.22	bim	2	CBL Vin	0.50 0.50	0.48	2	Vin ActD	0.50 0.50	0.34	0.14
1197	2	0	0.09	0	0	0	0	0	0.91	2	Vin ActD	0.50 0.50	0.34	2	Erlotinib SAHA	0.50 0.50	2.54	2.2	bim	2	CBL Vin	0.50 0.50	0.5	2	Vin ActD	0.50 0.50	0.34	0.16
1198	2	0	0.1	0	0	0	0	0	0.9	2	Vin ActD	0.50 0.50	0.34	2	Erlotinib SAHA	0.50 0.50	2.5	2.16	bim	2	CBL Vin	0.50 0.50	0.52	2	Vin ActD	0.50 0.50	0.34	0.18
1199	2	0	0.11	0	0	0	0	0	0.89	2	Vin ActD	0.50 0.50	0.34	2	Erlotinib SAHA	0.50 0.50	2.48	2.14	bim	2	CBL Vin	0.50 0.50	0.52	2	Vin ActD	0.50 0.50	0.34	0.18
1200	2	0	0.12	0	0	0	0	0	0.88	2	Vin ActD	0.50 0.50	0.34	2	Erlotinib SAHA	0.50 0.50	2.46	2.12	bim	2	CBL Vin	0.50 0.50	0.54	2	Vin ActD	0.50 0.50	0.34	0.2
1201	2	0	0.13	0	0	0	0	0	0.87	2	Vin ActD	0.50 0.50	0.34	2	Erlotinib SAHA	0.50 0.50	2.44	2.1	bim	2	CBL Vin	0.50 0.50	0.56	2	Vin ActD	0.50 0.50	0.34	0.22
1202	2	0	0.14	0	0	0	0	0	0.86	2	Vin ActD	0.50 0.50	0.34	2	Erlotinib SAHA	0.50 0.50	2.4	2.06	bim	2	CBL Vin	0.50 0.50	0.58	2	Vin ActD	0.50 0.50	0.34	0.24
1203	2	0	0.15	0	0	0	0	0	0.85	2	Vin ActD	0.50 0.50	0.34	2	Erlotinib SAHA	0.50 0.50	2.38	2.04	bim	2	CBL Vin	0.50 0.50	0.6	2	Vin ActD	0.50 0.50	0.34	0.26
1204	2	0	0.16	0	0	0	0	0	0.84	2	Vin ActD	0.50 0.50	0.34	2	Erlotinib SAHA	0.50 0.50	2.36	2.02	bim	2	CBL Vin	0.50 0.50	0.62	2	Vin ActD	0.50 0.50	0.34	0.28
1205	2	0	0.17	0	0	0	0	0	0.83	2	Vin ActD	0.50 0.50	0.34	2	Erlotinib SAHA	0.50 0.50	2.32	1.98	bim	2	CBL Vin	0.50 0.50	0.64	2	Vin ActD	0.50 0.50	0.34	0.3
1206	2	0	0.18	0	0	0	0	0	0.82	2	Vin ActD	0.50 0.50	0.34	2	Erlotinib SAHA	0.50 0.50	2.3	1.96	bim	2	CBL Vin	0.50 0.50	0.64	2	Vin ActD	0.50 0.50	0.34	0.3
1207	2	0	0.19	0	0	0	0	0	0.81	2	Vin ActD	0.50 0.50	0.34	2	Erlotinib SAHA	0.50 0.50	2.28	1.94	bim	2	CBL Vin	0.50 0.50	0.66	2	Vin ActD	0.50 0.50	0.34	0.32
1208	2	0	0.2	0	0	0	0	0	0.8	2	Vin ActD	0.50 0.50	0.34	2	Erlotinib SAHA	0.50 0.50	2.26	1.92	bim	2	CBL Vin	0.50 0.50	0.68	2	Vin ActD	0.50 0.50	0.34	0.34
1209	2	0	0.21	0	0	0	0	0	0.79	2	Vin ActD	0.50 0.50	0.32	2	Erlotinib SAHA	0.50 0.50	2.22	1.9	bim	2	CBL Vin	0.50 0.50	0.7	2	Vin ActD	0.50 0.50	0.32	0.38
1210	2	0	0.22	0	0	0	0	0	0.78	2	Vin ActD	0.50 0.50	0.32	2	Erlotinib SAHA	0.50 0.50	2.2	1.88	bim	2	CBL Vin	0.50 0.50	0.72	2	Vin ActD	0.50 0.50	0.32	0.4
1211	2	0	0.23	0	0	0	0	0	0.77	2	Vin ActD	0.50 0.50	0.32	2	Erlotinib SAHA	0.50 0.50	2.18	1.86	bim	2	CBL Vin	0.50 0.50	0.74	2	Vin ActD	0.50 0.50	0.32	0.42
1212	2	0	0.24	0	0	0	0	0	0.76	2	Vin ActD	0.50 0.50	0.32	2	Erlotinib SAHA	0.50 0.50	2.14	1.82	bim	2	CBL Vin	0.50 0.50	0.74	2	Vin ActD	0.50 0.50	0.32	0.42
1213	2	0	0.25	0	0	0	0	0	0.75	2	Vin ActD	0.50 0.50	0.32	2	Erlotinib SAHA	0.50 0.50	2.12	1.8	bim	2	CBL Vin	0.50 0.50	0.76	2	Vin ActD	0.50 0.50	0.32	0.44
1214	2	0	0.26	0	0	0	0	0	0.74	2	Vin ActD	0.50 0.50	0.32	2	Erlotinib SAHA	0.50 0.50	2.1	1.78	bim	2	CBL Vin	0.50 0.50	0.78	2	Vin ActD	0.50 0.50	0.32	0.46
1215	2	0	0.27	0	0	0	0	0	0.73	2	Vin ActD	0.50 0.50	0.32	2	Erlotinib SAHA	0.50 0.50	2.06	1.74	bim	2	CBL Vin	0.50 0.50	0.8	2	Vin ActD	0.50 0.50	0.32	0.48
1216	2	0	0.28	0	0	0	0	0	0.72	2	Vin ActD	0.50 0.50	0.32	2	Erlotinib SAHA	0.50 0.50	2.04	1.72	bim	2	CBL Vin	0.50 0.50	0.82	2	Vin ActD	0.50 0.50	0.32	0.5
1217	2	0	0.29	0	0	0	0	0	0.71	2	Vin ActD	0.50 0.50	0.32	2	Erlotinib SAHA	0.50 0.50	2.02	1.7	bim	2	CBL Vin	0.50 0.50	0.84	2	Vin ActD	0.50 0.50	0.32	0.52
1218	2	0	0.3	0	0	0	0	0	0.7	2	Vin ActD	0.50 0.50	0.32	2	IRT SAHA	0.50 0.50	2.02	1.7	bim	2	CBL Vin	0.50 0.50	0.86	2	Vin ActD	0.50 0.50	0.32	0.54
1219	2	0	0.31	0	0	0	0	0	0.69	2	Vin ActD	0.50 0.50	0.32	2	IRT SAHA	0.50 0.50	2.02	1.7	bim	2	CBL Vin	0.50 0.50	0.86	2	Vin ActD	0.50 0.50	0.32	0.54
1220	2	0	0.32	0	0	0	0	0	0.68	2	Vin ActD	0.50 0.50	0.32	2	IRT SAHA	0.50 0.50	2	1.68	bim	2	CBL Vin	0.50 0.50	0.88	2	Vin ActD	0.50 0.50	0.32	0.56
1221	2	0	0.33	0	0	0	0	0	0.67	2	Vin ActD	0.50 0.50	0.32	2	IRT SAHA	0.50 0.50	2	1.68	bim	2	CBL Vin	0.50 0.50	0.9	2	Vin ActD	0.50 0.50	0.32	0.58
1222	2	0	0.34	0	0	0	0	0	0.66	2	Vin ActD	0.50 0.50	0.32	2	IRT SAHA	0.50 0.50	2	1.68	bim	2	CBL Vin	0.50 0.50	0.92	2	Vin ActD	0.50 0.50	0.32	0.6
1223	2	0	0.35	0	0	0	0	0	0.65	2	Vin ActD	0.50 0.50	0.32	2	IRT SAHA	0.50 0.50	2	1.68	bim	2	CBL Vin	0.50 0.50	0.94	2	Vin ActD	0.50 0.50	0.32	0.62
1224	2	0	0.36	0	0	0	0	0	0.64	2	Vin ActD	0.50 0.50	0.32	2	IRT SAHA	0.50 0.50	2	1.68	bim	2	CBL Vin	0.50 0.50	0.96	2	Vin ActD	0.50 0.50	0.32	0.64
1225	2	0	0.37	0	0	0	0	0	0.63	2	Vin ActD	0.50 0.50	0.3	2	IRT SAHA	0.50 0.50	2	1.7	bim	2	CBL Vin	0.50 0.50	0.96	2	Vin ActD	0.50 0.50	0.3	0.66
1226	2	0	0.38	0	0	0	0	0	0.62	2	Vin ActD	0.50 0.50	0.3	2	IRT SAHA	0.50 0.50	2	1.7	bim	2	CBL Vin	0.50 0.50	0.98	2	Vin ActD	0.50 0.50	0.3	0.68
1227	2	0	0.39	0	0	0	0	0	0.61	2	Vin ActD	0.50 0.50	0.3	2	IRT SAHA	0.50 0.50	2	1.7	bim	2	CBL Vin	0.50 0.50	1	2	Vin ActD	0.50 0.50	0.3	0.7
1228	2	0	0.4	0	0	0	0	0	0.6	2	Vin ActD	0.50 0.50	0.3	2	CBL IRT	0.50 0.50	2	1.7	bim	2	CBL Vin	0.50 0.50	1.02	2	Vin ActD	0.50 0.50	0.3	0.72
1229	2	0	0.41	0	0	0	0	0	0.59	2	Vin ActD	0.50 0.50	0.3	2	CBL IRT	0.50 0.50	2.02	1.72	bim	2	CBL Vin	0.50 0.50	1.04	2	Vin ActD	0.50 0.50	0.3	0.74
1230	2	0	0.42	0	0	0	0	0	0.58	2	Vin ActD	0.50 0.50	0.3	2	CBL IRT	0.50 0.50	2.06	1.76	bim	2	CBL Vin	0.50 0.50	1.06	2	Vin ActD	0.50 0.50	0.3	0.76
1231	2	0	0.43	0	0	0	0	0	0.57	2	Vin ActD	0.50 0.50	0.3	2	CBL IRT	0.50 0.50	2.08	1.78	bim	2	CBL Vin	0.50 0.50	1.08	2	Vin ActD	0.50 0.50	0.3	0.78
1232	2	0	0.44	0	0	0	0	0	0.56	2	Vin ActD	0.50 0.50	0.3	2	CBL IRT	0.50 0.50	2.1	1.8	bim	2	CBL Vin	0.50 0.50	1.08	2	Vin ActD	0.50 0.50	0.3	0.78
1233	2	0	0.45	0	0	0	0	0	0.55	2	Vin ActD	0.50 0.50	0.3	2	CBL IRT	0.50 0.50	2.12	1.82	bim	2	CBL Vin	0.50 0.50	1.1	2	Vin ActD	0.50 0.50	0.3	0.8
1234	2	0	0.46	0	0	0	0	0	0.54	2	Vin ActD	0.50 0.50	0.3	2	CBL IRT	0.50 0.50	2.14	1.84	bim	2	CBL Vin	0.50 0.50	1.12	2	Vin ActD	0.50 0.50	0.3	0.82
1235	2	0	0.47	0	0	0	0	0	0.53	2	Vin ActD	0.50 0.50	0.3	2	CBL IRT	0.50 0.50	2.18	1.88	bim	2	CBL Vin	0.50 0.50	1.14	2	Vin ActD	0.50 0.50	0.3	0.84
1236	2	0	0.48	0	0	0	0	0	0.52	2	Vin ActD	0.50 0.50	0.3	2	CBL IRT	0.50 0.50	2.2	1.9	bim	2	CBL Vin	0.50 0.50	1.16	2	Vin ActD	0.50 0.50	0.3	0.86
1237	2	0	0.49	0	0	0	0	0	0.51	2	Vin ActD	0.50 0.50	0.3	2	CBL IRT	0.50 0.50	2.22	1.92	bim	2	CBL Vin	0.50 0.50	1.18	2	Vin ActD	0.50 0.50	0.3	0.88
1238	2	0	0.5	0	0	0	0	0	0.5	2	Vin ActD	0.50 0.50	0.3	2	CBL IRT	0.50 0.50	2.24	1.94	bim	2	CBL Vin	0.50 0.50	1.18	2	Vin ActD	0.50 0.50	0.3	0.88
1239	2	0	0.51	0	0	0	0	0	0.49	2	Vin ActD	0.50 0.50	0.3	2	CBL IRT	0.50 0.50	2.28	1.98	chk2	2	ActD Erlotinib	0.50 0.50	0.84	2	Vin ActD	0.50 0.50	0.3	0.54
1240	2	0	0.52	0	0	0	0	0	0.48	2	Vin ActD	0.50 0.50	0.3	2	CBL IRT	0.50 0.50	2.3	2	chk2	2	ActD Erlotinib	0.50 0.50	0.82	2	Vin ActD	0.50 0.50	0.3	0.52
1241	2	0	0.53	0	0	0	0	0	0.47	2	Vin ActD	0.50 0.50	0.28	2	CBL IRT	0.50 0.50	2.32	2.04	chk2	2	ActD Erlotinib	0.50 0.50	0.8	2	Vin ActD	0.50 0.50	0.28	0.52
1242	2	0	0.54	0	0	0	0	0	0.46	2	Vin ActD	0.50 0.50	0.28	2	CBL IRT	0.50 0.50	2.34	2.06	chk2	2	ActD Erlotinib	0.50 0.50	0.8	2	Vin ActD	0.50 0.50	0.28	0.52
1243	2	0	0.55	0	0	0	0	0	0.45	2	Vin ActD	0.50 0.50	0.28	2	CBL IRT	0.50 0.50	2.38	2.1	chk2	2	ActD Erlotinib	0.50 0.50	0.78	2	Vin ActD	0.50 0.50	0.28	0.5
1244	2	0	0.56	0	0	0	0	0	0.44	2	Vin ActD	0.50 0.50	0.28	2	CBL IRT	0.50 0.50	2.4	2.12	chk2	2	ActD Erlotinib	0.50 0.50	0.76	2	Vin ActD	0.50 0.50	0.28	0.48
1245	2	0	0.57	0	0	0	0	0	0.43	2	Vin ActD	0.50 0.50	0.28	2	CBL IRT	0.50 0.50	2.42	2.14	chk2	2	ActD Erlotinib	0.50 0.50	0.74	2	Vin ActD	0.50 0.50	0.28	0.46
1246	2	0	0.58	0	0	0	0	0	0.42	2	Vin ActD	0.50 0.50	0.28	2	CBL IRT	0.50 0.50	2.44	2.16	chk2	2	ActD Erlotinib	0.50 0.50	0.72	2	Vin ActD	0.50 0.50	0.28	0.44
1247	2	0	0.59	0	0	0	0	0	0.41	2	Vin ActD	0.50 0.50	0.28	2	CBL IRT	0.50 0.50	2.46	2.18	chk2	2	ActD Erlotinib	0.50 0.50	0.7	2	Vin ActD	0.50 0.50	0.28	0.42
1248	2	0	0.6	0	0	0	0	0	0.4	2	Vin ActD	0.50 0.50	0.28	2	CBL IRT	0.50 0.50	2.5	2.22	chk2	2	ActD Erlotinib	0.50 0.50	0.68	2	Vin ActD	0.50 0.50	0.28	0.4
1249	2	0	0.61	0	0	0	0	0	0.39	2	Vin ActD	0.50 0.50	0.28	2	CBL IRT	0.50 0.50	2.52	2.24	chk2	2	ActD Erlotinib	0.50 0.50	0.68	2	Vin ActD	0.50 0.50	0.28	0.4
1250	2	0	0.62	0	0	0	0	0	0.38	2	Vin ActD	0.50 0.50	0.28	2	CBL IRT	0.50 0.50	2.54	2.26	chk2	2	ActD Erlotinib	0.50 0.50	0.66	2	Vin ActD	0.50 0.50	0.28	0.38
1251	2	0	0.63	0	0	0	0	0	0.37	2	Vin ActD	0.50 0.50	0.28	2	CBL IRT	0.50 0.50	2.56	2.28	chk2	2	ActD Erlotinib	0.50 0.50	0.64	2	Vin ActD	0.50 0.50	0.28	0.36
1252	2	0	0.64	0	0	0	0	0	0.36	2	Vin ActD	0.50 0.50	0.28	2	CBL IRT	0.50 0.50	2.6	2.32	chk2	2	ActD Erlotinib	0.50 0.50	0.62	2	Vin ActD	0.50 0.50	0.28	0.34
1253	2	0	0.65	0	0	0	0	0	0.35	2	Vin ActD	0.50 0.50	0.28	2	CBL IRT	0.50 0.50	2.62	2.34	chk2	2	ActD Erlotinib	0.50 0.50	0.6	2	Vin ActD	0.50 0.50	0.28	0.32
1254	2	0	0.66	0	0	0	0	0	0.34	2	Vin ActD	0.50 0.50	0.28	2	CBL IRT	0.50 0.50	2.64	2.36	chk2	2	ActD Erlotinib	0.50 0.50	0.58	2	Vin ActD	0.50 0.50	0.28	0.3
1255	2	0	0.67	0	0	0	0	0	0.33	2	Vin ActD	0.50 0.50	0.28	2	CBL IRT	0.50 0.50	2.66	2.38	chk2	2	ActD Erlotinib	0.50 0.50	0.56	2	Vin ActD	0.50 0.50	0.28	0.28
1256	2	0	0.68	0	0	0	0	0	0.32	2	Vin ActD	0.50 0.50	0.28	2	CBL IRT	0.50 0.50	2.68	2.4	chk2	2	ActD Erlotinib	0.50 0.50	0.56	2	Vin ActD	0.50 0.50	0.28	0.28
1257	2	0	0.69	0	0	0	0	0	0.31	2	Vin ActD	0.50 0.50	0.26	2	CBL IRT	0.50 0.50	2.72	2.46	chk2	2	ActD Erlotinib	0.50 0.50	0.54	2	Vin ActD	0.50 0.50	0.26	0.28
1258	2	0	0.7	0	0	0	0	0	0.3	2	Vin ActD	0.50 0.50	0.26	2	CBL IRT	0.50 0.50	2.74	2.48	chk2	2	ActD Erlotinib	0.50 0.50	0.52	2	Vin ActD	0.50 0.50	0.26	0.26
1259	2	0	0.71	0	0	0	0	0	0.29	2	Vin ActD	0.50 0.50	0.26	2	CBL IRT	0.50 0.50	2.76	2.5	chk2	2	ActD Erlotinib	0.50 0.50	0.5	2	Vin ActD	0.50 0.50	0.26	0.24
1260	2	0	0.72	0	0	0	0	0	0.28	2	Vin ActD	0.50 0.50	0.26	2	CBL IRT	0.50 0.50	2.78	2.52	chk2	2	ActD Erlotinib	0.50 0.50	0.48	2	Vin ActD	0.50 0.50	0.26	0.22
1261	2	0	0.73	0	0	0	0	0	0.27	2	Vin ActD	0.50 0.50	0.26	2	CBL IRT	0.50 0.50	2.82	2.56	chk2	2	ActD Erlotinib	0.50 0.50	0.46	2	Vin ActD	0.50 0.50	0.26	0.2
1262	2	0	0.74	0	0	0	0	0	0.26	2	Vin ActD	0.50 0.50	0.26	2	CBL IRT	0.50 0.50	2.84	2.58	chk2	2	ActD Erlotinib	0.50 0.50	0.44	2	Vin ActD	0.50 0.50	0.26	0.18
1263	2	0	0.75	0	0	0	0	0	0.25	2	Vin ActD	0.50 0.50	0.26	2	CBL IRT	0.50 0.50	2.86	2.6	chk2	2	ActD Erlotinib	0.50 0.50	0.44	2	Vin ActD	0.50 0.50	0.26	0.18
1264	2	0	0.76	0	0	0	0	0	0.24	2	Vin ActD	0.50 0.50	0.26	2	CBL IRT	0.50 0.50	2.88	2.62	chk2	2	ActD Erlotinib	0.50 0.50	0.42	2	Vin ActD	0.50 0.50	0.26	0.16
1265	2	0	0.77	0	0	0	0	0	0.23	2	Vin ActD	0.50 0.50	0.26	2	CBL IRT	0.50 0.50	2.92	2.66	chk2	2	ActD Erlotinib	0.50 0.50	0.4	2	Vin ActD	0.50 0.50	0.26	0.14
1266	2	0	0.78	0	0	0	0	0	0.22	2	Vin ActD	0.50 0.50	0.26	2	CBL IRT	0.50 0.50	2.94	2.68	chk2	2	ActD Erlotinib	0.50 0.50	0.38	2	Vin ActD	0.50 0.50	0.26	0.12
1267	2	0	0.79	0	0	0	0	0	0.21	2	Vin ActD	0.50 0.50	0.26	2	CBL IRT	0.50 0.50	2.96	2.7	chk2	2	ActD Erlotinib	0.50 0.50	0.36	2	Vin ActD	0.50 0.50	0.26	0.1
1268	2	0	0.8	0	0	0	0	0	0.2	2	Vin ActD	0.50 0.50	0.26	2	CBL IRT	0.50 0.50	2.98	2.72	chk2	2	ActD Erlotinib	0.50 0.50	0.34	2	Vin ActD	0.50 0.50	0.26	0.08
1269	2	0	0.81	0	0	0	0	0	0.19	2	Vin ActD	0.50 0.50	0.26	2	CBL IRT	0.50 0.50	3	2.74	chk2	2	ActD Erlotinib	0.50 0.50	0.32	2	Vin ActD	0.50 0.50	0.26	0.06
1270	2	0	0.82	0	0	0	0	0	0.18	2	Vin ActD	0.50 0.50	0.26	2	CBL IRT	0.50 0.50	3.04	2.78	chk2	2	ActD Erlotinib	0.50 0.50	0.32	2	Vin ActD	0.50 0.50	0.26	0.06
1271	2	0	0.83	0	0	0	0	0	0.17	2	Vin ActD	0.50 0.50	0.26	2	CBL IRT	0.50 0.50	3.06	2.8	chk2	2	ActD Erlotinib	0.50 0.50	0.3	2	Vin ActD	0.50 0.50	0.26	0.04
1272	2	0	0.84	0	0	0	0	0	0.16	2	Vin ActD	0.50 0.50	0.26	2	CBL IRT	0.50 0.50	3.08	2.82	chk2	2	ActD Erlotinib	0.50 0.50	0.28	2	Vin ActD	0.50 0.50	0.26	0.02
1273	2	0	0.85	0	0	0	0	0	0.15	2	Vin ActD	0.50 0.50	0.26	2	CBL IRT	0.50 0.50	3.1	2.84	chk2	2	ActD Erlotinib	0.50 0.50	0.26	2	Vin ActD	0.50 0.50	0.26	0
1274	2	0	0.86	0	0	0	0	0	0.14	2	ActD Erlotinib	0.50 0.50	0.24	2	CBL IRT	0.50 0.50	3.14	2.9	chk2	2	ActD Erlotinib	0.50 0.50	0.24	2	ActD Erlotinib	0.50 0.50	0.24	0
1275	2	0	0.87	0	0	0	0	0	0.13	2	ActD Erlotinib	0.50 0.50	0.22	2	CBL IRT	0.50 0.50	3.16	2.94	chk2	2	ActD Erlotinib	0.50 0.50	0.22	2	ActD Erlotinib	0.50 0.50	0.22	0
1276	2	0	0.88	0	0	0	0	0	0.12	2	ActD Erlotinib	0.50 0.50	0.2	2	CBL IRT	0.50 0.50	3.18	2.98	chk2	2	ActD Erlotinib	0.50 0.50	0.2	2	ActD Erlotinib	0.50 0.50	0.2	0
1277	2	0	0.89	0	0	0	0	0	0.11	2	ActD Erlotinib	0.50 0.50	0.2	2	CBL IRT	0.50 0.50	3.2	3	chk2	2	ActD Erlotinib	0.50 0.50	0.2	2	ActD Erlotinib	0.50 0.50	0.2	0
1278	2	0	0.9	0	0	0	0	0	0.1	2	ActD Erlotinib	0.50 0.50	0.18	2	CBL IRT	0.50 0.50	3.22	3.04	chk2	2	ActD Erlotinib	0.50 0.50	0.18	2	ActD Erlotinib	0.50 0.50	0.18	0
1279	2	0	0.91	0	0	0	0	0	0.09	2	ActD Erlotinib	0.50 0.50	0.16	2	CBL IRT	0.50 0.50	3.26	3.1	chk2	2	ActD Erlotinib	0.50 0.50	0.16	2	ActD Erlotinib	0.50 0.50	0.16	0
1280	2	0	0.92	0	0	0	0	0	0.08	2	ActD Erlotinib	0.50 0.50	0.14	2	CBL IRT	0.50 0.50	3.28	3.14	chk2	2	ActD Erlotinib	0.50 0.50	0.14	2	ActD Erlotinib	0.50 0.50	0.14	0
1281	2	0	0.93	0	0	0	0	0	0.07	2	ActD Erlotinib	0.50 0.50	0.12	2	CBL IRT	0.50 0.50	3.3	3.18	chk2	2	ActD Erlotinib	0.50 0.50	0.12	2	ActD Erlotinib	0.50 0.50	0.12	0
1282	2	0	0.94	0	0	0	0	0	0.06	2	ActD Erlotinib	0.50 0.50	0.1	2	CBL IRT	0.50 0.50	3.32	3.22	chk2	2	ActD Erlotinib	0.50 0.50	0.1	2	ActD Erlotinib	0.50 0.50	0.1	0
1283	2	0	0.95	0	0	0	0	0	0.05	2	ActD Erlotinib	0.50 0.50	0.08	2	CBL IRT	0.50 0.50	3.36	3.28	chk2	2	ActD Erlotinib	0.50 0.50	0.08	2	ActD Erlotinib	0.50 0.50	0.08	0
1284	2	0	0.96	0	0	0	0	0	0.04	2	ActD Erlotinib	0.50 0.50	0.08	2	CBL IRT	0.50 0.50	3.38	3.3	chk2	2	ActD Erlotinib	0.50 0.50	0.08	2	ActD Erlotinib	0.50 0.50	0.08	0
1285	2	0	0.97	0	0	0	0	0	0.03	2	ActD Erlotinib	0.50 0.50	0.06	2	CBL IRT	0.50 0.50	3.4	3.34	chk2	2	ActD Erlotinib	0.50 0.50	0.06	2	ActD Erlotinib	0.50 0.50	0.06	0
1286	2	0	0.98	0	0	0	0	0	0.02	2	ActD Erlotinib	0.50 0.50	0.04	2	CBL IRT	0.50 0.50	3.42	3.38	chk2	2	ActD Erlotinib	0.50 0.50	0.04	2	ActD Erlotinib	0.50 0.50	0.04	0
1287	2	0	0.99	0	0	0	0	0	0.01	2	ActD Erlotinib	0.50 0.50	0.02	2	CBL IRT	0.50 0.50	3.46	3.44	chk2	2	ActD Erlotinib	0.50 0.50	0.02	2	ActD Erlotinib	0.50 0.50	0.02	0
1288	2	0	0	0.01	0.99	0	0	0	0	2	CBL 5FU	0.50 0.50	-1.66	2	DOX Sunitinib	0.50 0.50	-0.04	1.62	chk1	2	CBL 5FU	0.50 0.50	-1.66	2	CBL 5FU	0.50 0.50	-1.66	0
1289	2	0	0	0.02	0.98	0	0	0	0	2	CBL 5FU	0.50 0.50	-1.66	2	DOX Sunitinib	0.50 0.50	-0.02	1.64	chk1	2	CBL 5FU	0.50 0.50	-1.66	2	CBL 5FU	0.50 0.50	-1.66	0
1290	2	0	0	0.03	0.97	0	0	0	0	2	CBL 5FU	0.50 0.50	-1.64	2	DOX Sunitinib	0.50 0.50	-0.02	1.62	chk1	2	CBL 5FU	0.50 0.50	-1.64	2	CBL 5FU	0.50 0.50	-1.64	0
1291	2	0	0	0.04	0.96	0	0	0	0	2	CBL 5FU	0.50 0.50	-1.62	2	DOX Sunitinib	0.50 0.50	-0.02	1.6	chk1	2	CBL 5FU	0.50 0.50	-1.62	2	CBL 5FU	0.50 0.50	-1.62	0
1292	2	0	0	0.05	0.95	0	0	0	0	2	CBL 5FU	0.50 0.50	-1.62	2	DOX Sunitinib	0.50 0.50	0	1.62	chk1	2	CBL 5FU	0.50 0.50	-1.62	2	CBL 5FU	0.50 0.50	-1.62	0
1293	2	0	0	0.06	0.94	0	0	0	0	2	CBL 5FU	0.50 0.50	-1.6	2	DOX Sunitinib	0.50 0.50	0	1.6	chk1	2	CBL 5FU	0.50 0.50	-1.6	2	CBL 5FU	0.50 0.50	-1.6	0
1294	2	0	0	0.07	0.93	0	0	0	0	2	CBL 5FU	0.50 0.50	-1.6	2	DOX Sunitinib	0.50 0.50	0	1.6	chk1	2	CBL 5FU	0.50 0.50	-1.6	2	CBL 5FU	0.50 0.50	-1.6	0
1295	2	0	0	0.08	0.92	0	0	0	0	2	CBL 5FU	0.50 0.50	-1.58	2	DOX Sunitinib	0.50 0.50	0.02	1.6	chk1	2	CBL 5FU	0.50 0.50	-1.58	2	CBL 5FU	0.50 0.50	-1.58	0
1296	2	0	0	0.09	0.91	0	0	0	0	2	CBL 5FU	0.50 0.50	-1.56	2	DOX Sunitinib	0.50 0.50	0.02	1.58	chk1	2	CBL 5FU	0.50 0.50	-1.56	2	CBL 5FU	0.50 0.50	-1.56	0
1297	2	0	0	0.1	0.9	0	0	0	0	2	CBL 5FU	0.50 0.50	-1.56	2	DOX Sunitinib	0.50 0.50	0.02	1.58	chk1	2	CBL 5FU	0.50 0.50	-1.56	2	CBL 5FU	0.50 0.50	-1.56	0
1298	2	0	0	0.11	0.89	0	0	0	0	2	CBL 5FU	0.50 0.50	-1.54	2	DOX Sunitinib	0.50 0.50	0.04	1.58	chk1	2	CBL 5FU	0.50 0.50	-1.54	2	CBL 5FU	0.50 0.50	-1.54	0
1299	2	0	0	0.12	0.88	0	0	0	0	2	CBL 5FU	0.50 0.50	-1.52	2	DOX Sunitinib	0.50 0.50	0.04	1.56	chk1	2	CBL 5FU	0.50 0.50	-1.52	2	CBL 5FU	0.50 0.50	-1.52	0
1300	2	0	0	0.13	0.87	0	0	0	0	2	CBL 5FU	0.50 0.50	-1.52	2	DOX Sunitinib	0.50 0.50	0.04	1.56	chk1	2	CBL 5FU	0.50 0.50	-1.52	2	CBL 5FU	0.50 0.50	-1.52	0
1301	2	0	0	0.14	0.86	0	0	0	0	2	CBL 5FU	0.50 0.50	-1.5	2	DOX Sunitinib	0.50 0.50	0.06	1.56	chk1	2	CBL 5FU	0.50 0.50	-1.5	2	CBL 5FU	0.50 0.50	-1.5	0
1302	2	0	0	0.15	0.85	0	0	0	0	2	CBL 5FU	0.50 0.50	-1.5	2	DOX Sunitinib	0.50 0.50	0.06	1.56	chk1	2	CBL 5FU	0.50 0.50	-1.5	2	CBL 5FU	0.50 0.50	-1.5	0
1303	2	0	0	0.16	0.84	0	0	0	0	2	CBL 5FU	0.50 0.50	-1.48	2	DOX Sunitinib	0.50 0.50	0.06	1.54	chk1	2	CBL 5FU	0.50 0.50	-1.48	2	CBL 5FU	0.50 0.50	-1.48	0
1304	2	0	0	0.17	0.83	0	0	0	0	2	CBL 5FU	0.50 0.50	-1.46	2	DOX Sunitinib	0.50 0.50	0.08	1.54	chk1	2	CBL 5FU	0.50 0.50	-1.46	2	CBL 5FU	0.50 0.50	-1.46	0
1305	2	0	0	0.18	0.82	0	0	0	0	2	CBL 5FU	0.50 0.50	-1.46	2	DOX Sunitinib	0.50 0.50	0.08	1.54	chk1	2	CBL 5FU	0.50 0.50	-1.46	2	CBL 5FU	0.50 0.50	-1.46	0
1306	2	0	0	0.19	0.81	0	0	0	0	2	CBL 5FU	0.50 0.50	-1.44	2	DOX Sunitinib	0.50 0.50	0.08	1.52	chk1	2	CBL 5FU	0.50 0.50	-1.44	2	CBL 5FU	0.50 0.50	-1.44	0
1307	2	0	0	0.2	0.8	0	0	0	0	2	CBL 5FU	0.50 0.50	-1.42	2	DOX Sunitinib	0.50 0.50	0.1	1.52	chk1	2	CBL 5FU	0.50 0.50	-1.42	2	CBL 5FU	0.50 0.50	-1.42	0
1308	2	0	0	0.21	0.79	0	0	0	0	2	CBL 5FU	0.50 0.50	-1.42	2	DOX Sunitinib	0.50 0.50	0.1	1.52	chk1	2	CBL 5FU	0.50 0.50	-1.42	2	CBL 5FU	0.50 0.50	-1.42	0
1309	2	0	0	0.22	0.78	0	0	0	0	2	CBL 5FU	0.50 0.50	-1.4	2	DOX Sunitinib	0.50 0.50	0.1	1.5	chk1	2	CBL 5FU	0.50 0.50	-1.4	2	CBL 5FU	0.50 0.50	-1.4	0
1310	2	0	0	0.23	0.77	0	0	0	0	2	CBL 5FU	0.50 0.50	-1.4	2	DOX ActD	0.50 0.50	0.12	1.52	chk1	2	CBL 5FU	0.50 0.50	-1.4	2	CBL 5FU	0.50 0.50	-1.4	0
1311	2	0	0	0.24	0.76	0	0	0	0	2	CBL 5FU	0.50 0.50	-1.38	2	DOX ActD	0.50 0.50	0.12	1.5	chk1	2	CBL 5FU	0.50 0.50	-1.38	2	CBL 5FU	0.50 0.50	-1.38	0
1312	2	0	0	0.25	0.75	0	0	0	0	2	CBL 5FU	0.50 0.50	-1.36	2	DOX ActD	0.50 0.50	0.14	1.5	chk1	2	CBL 5FU	0.50 0.50	-1.36	2	CBL 5FU	0.50 0.50	-1.36	0
1313	2	0	0	0.26	0.74	0	0	0	0	2	CBL 5FU	0.50 0.50	-1.36	2	DOX ActD	0.50 0.50	0.16	1.52	chk1	2	CBL 5FU	0.50 0.50	-1.36	2	CBL 5FU	0.50 0.50	-1.36	0
1314	2	0	0	0.27	0.73	0	0	0	0	2	CBL 5FU	0.50 0.50	-1.34	2	DOX ActD	0.50 0.50	0.16	1.5	chk1	2	CBL 5FU	0.50 0.50	-1.34	2	CBL 5FU	0.50 0.50	-1.34	0
1315	2	0	0	0.28	0.72	0	0	0	0	2	CBL 5FU	0.50 0.50	-1.34	2	DOX ActD	0.50 0.50	0.18	1.52	chk1	2	CBL 5FU	0.50 0.50	-1.34	2	CBL 5FU	0.50 0.50	-1.34	0
1316	2	0	0	0.29	0.71	0	0	0	0	2	CBL 5FU	0.50 0.50	-1.32	2	DOX ActD	0.50 0.50	0.2	1.52	chk1	2	CBL 5FU	0.50 0.50	-1.32	2	CBL 5FU	0.50 0.50	-1.32	0
1317	2	0	0	0.3	0.7	0	0	0	0	2	CBL 5FU	0.50 0.50	-1.3	2	DOX ActD	0.50 0.50	0.2	1.5	chk1	2	CBL 5FU	0.50 0.50	-1.3	2	CBL 5FU	0.50 0.50	-1.3	0
1318	2	0	0	0.31	0.69	0	0	0	0	2	CBL 5FU	0.50 0.50	-1.3	2	DOX ActD	0.50 0.50	0.22	1.52	chk1	2	CBL 5FU	0.50 0.50	-1.3	2	CBL 5FU	0.50 0.50	-1.3	0
1319	2	0	0	0.32	0.68	0	0	0	0	2	CBL 5FU	0.50 0.50	-1.28	2	DOX ActD	0.50 0.50	0.24	1.52	chk1	2	CBL 5FU	0.50 0.50	-1.28	2	CBL 5FU	0.50 0.50	-1.28	0
1320	2	0	0	0.33	0.67	0	0	0	0	2	CBL 5FU	0.50 0.50	-1.26	2	DOX ActD	0.50 0.50	0.24	1.5	chk1	2	CBL 5FU	0.50 0.50	-1.26	2	CBL 5FU	0.50 0.50	-1.26	0
1321	2	0	0	0.34	0.66	0	0	0	0	2	CBL 5FU	0.50 0.50	-1.26	2	DOX ActD	0.50 0.50	0.26	1.52	chk1	2	CBL 5FU	0.50 0.50	-1.26	2	CBL 5FU	0.50 0.50	-1.26	0
1322	2	0	0	0.35	0.65	0	0	0	0	2	CBL 5FU	0.50 0.50	-1.24	2	DOX ActD	0.50 0.50	0.28	1.52	chk1	2	CBL 5FU	0.50 0.50	-1.24	2	CBL 5FU	0.50 0.50	-1.24	0
1323	2	0	0	0.36	0.64	0	0	0	0	2	CBL 5FU	0.50 0.50	-1.24	2	DOX ActD	0.50 0.50	0.28	1.52	chk1	2	CBL 5FU	0.50 0.50	-1.24	2	CBL 5FU	0.50 0.50	-1.24	0
1324	2	0	0	0.37	0.63	0	0	0	0	2	CBL 5FU	0.50 0.50	-1.22	2	DOX ActD	0.50 0.50	0.3	1.52	chk1	2	CBL 5FU	0.50 0.50	-1.22	2	CBL 5FU	0.50 0.50	-1.22	0
1325	2	0	0	0.38	0.62	0	0	0	0	2	CBL 5FU	0.50 0.50	-1.2	2	DOX ActD	0.50 0.50	0.32	1.52	chk1	2	CBL 5FU	0.50 0.50	-1.2	2	CBL 5FU	0.50 0.50	-1.2	0
1326	2	0	0	0.39	0.61	0	0	0	0	2	CBL 5FU	0.50 0.50	-1.2	2	DOX ActD	0.50 0.50	0.32	1.52	chk1	2	CBL 5FU	0.50 0.50	-1.2	2	CBL 5FU	0.50 0.50	-1.2	0
1327	2	0	0	0.4	0.6	0	0	0	0	2	CBL 5FU	0.50 0.50	-1.18	2	DOX ActD	0.50 0.50	0.34	1.52	chk1	2	CBL 5FU	0.50 0.50	-1.18	2	CBL 5FU	0.50 0.50	-1.18	0
1328	2	0	0	0.41	0.59	0	0	0	0	2	CBL 5FU	0.50 0.50	-1.18	2	DOX ActD	0.50 0.50	0.36	1.54	chk1	2	CBL 5FU	0.50 0.50	-1.18	2	CBL 5FU	0.50 0.50	-1.18	0
1329	2	0	0	0.42	0.58	0	0	0	0	2	CBL 5FU	0.50 0.50	-1.16	2	DOX ActD	0.50 0.50	0.36	1.52	chk1	2	CBL 5FU	0.50 0.50	-1.16	2	CBL 5FU	0.50 0.50	-1.16	0
1330	2	0	0	0.43	0.57	0	0	0	0	2	CBL 5FU	0.50 0.50	-1.14	2	DOX ActD	0.50 0.50	0.38	1.52	chk1	2	CBL 5FU	0.50 0.50	-1.14	2	CBL 5FU	0.50 0.50	-1.14	0
1331	2	0	0	0.44	0.56	0	0	0	0	2	CBL 5FU	0.50 0.50	-1.14	2	DOX ActD	0.50 0.50	0.4	1.54	chk1	2	CBL 5FU	0.50 0.50	-1.14	2	CBL 5FU	0.50 0.50	-1.14	0
1332	2	0	0	0.45	0.55	0	0	0	0	2	CBL 5FU	0.50 0.50	-1.12	2	DOX ActD	0.50 0.50	0.4	1.52	chk1	2	CBL 5FU	0.50 0.50	-1.12	2	CBL 5FU	0.50 0.50	-1.12	0
1333	2	0	0	0.46	0.54	0	0	0	0	2	CBL 5FU	0.50 0.50	-1.1	2	DOX ActD	0.50 0.50	0.42	1.52	chk1	2	CBL 5FU	0.50 0.50	-1.1	2	CBL 5FU	0.50 0.50	-1.1	0
1334	2	0	0	0.47	0.53	0	0	0	0	2	CBL 5FU	0.50 0.50	-1.1	2	DOX ActD	0.50 0.50	0.44	1.54	chk1	2	CBL 5FU	0.50 0.50	-1.1	2	CBL 5FU	0.50 0.50	-1.1	0
1335	2	0	0	0.48	0.52	0	0	0	0	2	CBL 5FU	0.50 0.50	-1.08	2	DOX ActD	0.50 0.50	0.44	1.52	chk1	2	CBL 5FU	0.50 0.50	-1.08	2	CBL 5FU	0.50 0.50	-1.08	0
1336	2	0	0	0.49	0.51	0	0	0	0	2	CBL 5FU	0.50 0.50	-1.08	2	DOX ActD	0.50 0.50	0.46	1.54	chk1	2	CBL 5FU	0.50 0.50	-1.08	2	CBL 5FU	0.50 0.50	-1.08	0
1337	2	0	0	0.5	0.5	0	0	0	0	2	CBL 5FU	0.50 0.50	-1.06	2	DOX ActD	0.50 0.50	0.46	1.52	chk1	2	CBL 5FU	0.50 0.50	-1.06	2	CBL 5FU	0.50 0.50	-1.06	0
1338	2	0	0	0.51	0.49	0	0	0	0	2	CBL 5FU	0.50 0.50	-1.04	2	DOX ActD	0.50 0.50	0.48	1.52	atr	2	5FU SAHA	0.50 0.50	-0.98	2	CBL 5FU	0.50 0.50	-1.04	0.06
1339	2	0	0	0.52	0.48	0	0	0	0	2	CBL 5FU	0.50 0.50	-1.04	2	DOX ActD	0.50 0.50	0.5	1.54	atr	2	5FU SAHA	0.50 0.50	-0.96	2	CBL 5FU	0.50 0.50	-1.04	0.08
1340	2	0	0	0.53	0.47	0	0	0	0	2	CBL 5FU	0.50 0.50	-1.02	2	DOX ActD	0.50 0.50	0.5	1.52	atr	2	5FU SAHA	0.50 0.50	-0.96	2	CBL 5FU	0.50 0.50	-1.02	0.06
1341	2	0	0	0.54	0.46	0	0	0	0	2	CBL 5FU	0.50 0.50	-1	2	DOX ActD	0.50 0.50	0.52	1.52	atr	2	5FU SAHA	0.50 0.50	-0.96	2	CBL 5FU	0.50 0.50	-1	0.04
1342	2	0	0	0.55	0.45	0	0	0	0	2	CBL 5FU	0.50 0.50	-1	2	DOX ActD	0.50 0.50	0.54	1.54	atr	2	5FU SAHA	0.50 0.50	-0.94	2	CBL 5FU	0.50 0.50	-1	0.06
1343	2	0	0	0.56	0.44	0	0	0	0	2	CBL 5FU	0.50 0.50	-0.98	2	DOX ActD	0.50 0.50	0.54	1.52	atr	2	5FU SAHA	0.50 0.50	-0.94	2	CBL 5FU	0.50 0.50	-0.98	0.04
1344	2	0	0	0.57	0.43	0	0	0	0	2	CBL 5FU	0.50 0.50	-0.98	2	DOX ActD	0.50 0.50	0.56	1.54	atr	2	5FU SAHA	0.50 0.50	-0.92	2	CBL 5FU	0.50 0.50	-0.98	0.06
1345	2	0	0	0.58	0.42	0	0	0	0	2	CBL 5FU	0.50 0.50	-0.96	2	DOX ActD	0.50 0.50	0.58	1.54	atr	2	5FU SAHA	0.50 0.50	-0.92	2	CBL 5FU	0.50 0.50	-0.96	0.04
1346	2	0	0	0.59	0.41	0	0	0	0	2	CBL 5FU	0.50 0.50	-0.94	2	DOX ActD	0.50 0.50	0.58	1.52	atr	2	5FU SAHA	0.50 0.50	-0.92	2	CBL 5FU	0.50 0.50	-0.94	0.02
1347	2	0	0	0.6	0.4	0	0	0	0	2	CBL 5FU	0.50 0.50	-0.94	2	DOX ActD	0.50 0.50	0.6	1.54	atr	2	5FU SAHA	0.50 0.50	-0.9	2	CBL 5FU	0.50 0.50	-0.94	0.04
1348	2	0	0	0.61	0.39	0	0	0	0	2	CBL 5FU	0.50 0.50	-0.92	2	DOX ActD	0.50 0.50	0.62	1.54	atr	2	5FU SAHA	0.50 0.50	-0.9	2	CBL 5FU	0.50 0.50	-0.92	0.02
1349	2	0	0	0.62	0.38	0	0	0	0	2	CBL 5FU	0.50 0.50	-0.92	2	DOX ActD	0.50 0.50	0.62	1.54	atr	2	5FU SAHA	0.50 0.50	-0.88	2	CBL 5FU	0.50 0.50	-0.92	0.04
1350	2	0	0	0.63	0.37	0	0	0	0	2	CBL 5FU	0.50 0.50	-0.9	2	DOX ActD	0.50 0.50	0.64	1.54	atr	2	5FU SAHA	0.50 0.50	-0.88	2	CBL 5FU	0.50 0.50	-0.9	0.02
1351	2	0	0	0.64	0.36	0	0	0	0	2	CBL 5FU	0.50 0.50	-0.88	2	DOX ActD	0.50 0.50	0.66	1.54	atr	2	5FU SAHA	0.50 0.50	-0.88	2	CBL 5FU	0.50 0.50	-0.88	0
1352	2	0	0	0.65	0.35	0	0	0	0	2	CBL 5FU	0.50 0.50	-0.88	2	DOX ActD	0.50 0.50	0.66	1.54	atr	2	5FU SAHA	0.50 0.50	-0.86	2	CBL 5FU	0.50 0.50	-0.88	0.02
1353	2	0	0	0.66	0.34	0	0	0	0	2	CBL 5FU	0.50 0.50	-0.86	2	DOX ActD	0.50 0.50	0.68	1.54	atr	2	5FU SAHA	0.50 0.50	-0.86	2	CBL 5FU	0.50 0.50	-0.86	0
1354	2	0	0	0.67	0.33	0	0	0	0	2	CBL 5FU	0.50 0.50	-0.84	2	DOX ActD	0.50 0.50	0.7	1.54	atr	2	5FU SAHA	0.50 0.50	-0.84	2	CBL 5FU	0.50 0.50	-0.84	0
1355	2	0	0	0.68	0.32	0	0	0	0	2	5FU SAHA	0.50 0.50	-0.84	2	DOX ActD	0.50 0.50	0.7	1.54	atr	2	5FU SAHA	0.50 0.50	-0.84	2	5FU SAHA	0.50 0.50	-0.84	0
1356	2	0	0	0.69	0.31	0	0	0	0	2	5FU SAHA	0.50 0.50	-0.84	2	DOX ActD	0.50 0.50	0.72	1.56	atr	2	5FU SAHA	0.50 0.50	-0.84	2	5FU SAHA	0.50 0.50	-0.84	0
1357	2	0	0	0.7	0.3	0	0	0	0	2	5FU SAHA	0.50 0.50	-0.82	2	DOX ActD	0.50 0.50	0.74	1.56	atr	2	5FU SAHA	0.50 0.50	-0.82	2	5FU SAHA	0.50 0.50	-0.82	0
1358	2	0	0	0.71	0.29	0	0	0	0	2	5FU SAHA	0.50 0.50	-0.82	2	DOX ActD	0.50 0.50	0.74	1.56	atr	2	5FU SAHA	0.50 0.50	-0.82	2	5FU SAHA	0.50 0.50	-0.82	0
1359	2	0	0	0.72	0.28	0	0	0	0	2	5FU SAHA	0.50 0.50	-0.8	2	DOX ActD	0.50 0.50	0.76	1.56	atr	2	5FU SAHA	0.50 0.50	-0.8	2	5FU SAHA	0.50 0.50	-0.8	0
1360	2	0	0	0.73	0.27	0	0	0	0	2	5FU SAHA	0.50 0.50	-0.8	2	DOX ActD	0.50 0.50	0.78	1.58	atr	2	5FU SAHA	0.50 0.50	-0.8	2	5FU SAHA	0.50 0.50	-0.8	0
1361	2	0	0	0.74	0.26	0	0	0	0	2	5FU SAHA	0.50 0.50	-0.78	2	DOX ActD	0.50 0.50	0.78	1.56	atr	2	5FU SAHA	0.50 0.50	-0.78	2	5FU SAHA	0.50 0.50	-0.78	0
1362	2	0	0	0.75	0.25	0	0	0	0	2	5FU SAHA	0.50 0.50	-0.78	2	DOX ActD	0.50 0.50	0.8	1.58	atr	2	5FU SAHA	0.50 0.50	-0.78	2	5FU SAHA	0.50 0.50	-0.78	0
1363	2	0	0	0.76	0.24	0	0	0	0	2	5FU SAHA	0.50 0.50	-0.78	2	DOX ActD	0.50 0.50	0.82	1.6	atr	2	5FU SAHA	0.50 0.50	-0.78	2	5FU SAHA	0.50 0.50	-0.78	0
1364	2	0	0	0.77	0.23	0	0	0	0	2	5FU SAHA	0.50 0.50	-0.76	2	DOX ActD	0.50 0.50	0.82	1.58	atr	2	5FU SAHA	0.50 0.50	-0.76	2	5FU SAHA	0.50 0.50	-0.76	0
1365	2	0	0	0.78	0.22	0	0	0	0	2	5FU SAHA	0.50 0.50	-0.76	2	DOX ActD	0.50 0.50	0.84	1.6	atr	2	5FU SAHA	0.50 0.50	-0.76	2	5FU SAHA	0.50 0.50	-0.76	0
1366	2	0	0	0.79	0.21	0	0	0	0	2	5FU SAHA	0.50 0.50	-0.74	2	DOX ActD	0.50 0.50	0.86	1.6	atr	2	5FU SAHA	0.50 0.50	-0.74	2	5FU SAHA	0.50 0.50	-0.74	0
1367	2	0	0	0.8	0.2	0	0	0	0	2	5FU SAHA	0.50 0.50	-0.74	2	DOX ActD	0.50 0.50	0.86	1.6	atr	2	5FU SAHA	0.50 0.50	-0.74	2	5FU SAHA	0.50 0.50	-0.74	0
1368	2	0	0	0.81	0.19	0	0	0	0	2	5FU SAHA	0.50 0.50	-0.74	2	DOX ActD	0.50 0.50	0.88	1.62	atr	2	5FU SAHA	0.50 0.50	-0.74	2	5FU SAHA	0.50 0.50	-0.74	0
1369	2	0	0	0.82	0.18	0	0	0	0	2	5FU SAHA	0.50 0.50	-0.72	2	DOX ActD	0.50 0.50	0.88	1.6	atr	2	5FU SAHA	0.50 0.50	-0.72	2	5FU SAHA	0.50 0.50	-0.72	0
1370	2	0	0	0.83	0.17	0	0	0	0	2	5FU SAHA	0.50 0.50	-0.72	2	DOX ActD	0.50 0.50	0.9	1.62	atr	2	5FU SAHA	0.50 0.50	-0.72	2	5FU SAHA	0.50 0.50	-0.72	0
1371	2	0	0	0.84	0.16	0	0	0	0	2	5FU SAHA	0.50 0.50	-0.7	2	DOX ActD	0.50 0.50	0.92	1.62	atr	2	5FU SAHA	0.50 0.50	-0.7	2	5FU SAHA	0.50 0.50	-0.7	0
1372	2	0	0	0.85	0.15	0	0	0	0	2	5FU SAHA	0.50 0.50	-0.7	2	DOX ActD	0.50 0.50	0.92	1.62	atr	2	5FU SAHA	0.50 0.50	-0.7	2	5FU SAHA	0.50 0.50	-0.7	0
1373	2	0	0	0.86	0.14	0	0	0	0	2	5FU SAHA	0.50 0.50	-0.7	2	DOX ActD	0.50 0.50	0.94	1.64	atr	2	5FU SAHA	0.50 0.50	-0.7	2	5FU SAHA	0.50 0.50	-0.7	0
1374	2	0	0	0.87	0.13	0	0	0	0	2	5FU SAHA	0.50 0.50	-0.68	2	DOX ActD	0.50 0.50	0.96	1.64	atr	2	5FU SAHA	0.50 0.50	-0.68	2	5FU SAHA	0.50 0.50	-0.68	0
1375	2	0	0	0.88	0.12	0	0	0	0	2	5FU SAHA	0.50 0.50	-0.68	2	DOX ActD	0.50 0.50	0.96	1.64	atr	2	5FU SAHA	0.50 0.50	-0.68	2	5FU SAHA	0.50 0.50	-0.68	0
1376	2	0	0	0.89	0.11	0	0	0	0	2	5FU SAHA	0.50 0.50	-0.66	2	DOX ActD	0.50 0.50	0.98	1.64	atr	2	5FU SAHA	0.50 0.50	-0.66	2	5FU SAHA	0.50 0.50	-0.66	0
1377	2	0	0	0.9	0.1	0	0	0	0	2	5FU SAHA	0.50 0.50	-0.66	2	DOX ActD	0.50 0.50	1	1.66	atr	2	5FU SAHA	0.50 0.50	-0.66	2	5FU SAHA	0.50 0.50	-0.66	0
1378	2	0	0	0.91	0.09	0	0	0	0	2	5FU SAHA	0.50 0.50	-0.66	2	DOX ActD	0.50 0.50	1	1.66	atr	2	5FU SAHA	0.50 0.50	-0.66	2	5FU SAHA	0.50 0.50	-0.66	0
1379	2	0	0	0.92	0.08	0	0	0	0	2	5FU SAHA	0.50 0.50	-0.64	2	DOX ActD	0.50 0.50	1.02	1.66	atr	2	5FU SAHA	0.50 0.50	-0.64	2	5FU SAHA	0.50 0.50	-0.64	0
1380	2	0	0	0.93	0.07	0	0	0	0	2	5FU SAHA	0.50 0.50	-0.64	2	DOX ActD	0.50 0.50	1.04	1.68	atr	2	5FU SAHA	0.50 0.50	-0.64	2	5FU SAHA	0.50 0.50	-0.64	0
1381	2	0	0	0.94	0.06	0	0	0	0	2	5FU SAHA	0.50 0.50	-0.62	2	DOX ActD	0.50 0.50	1.04	1.66	atr	2	5FU SAHA	0.50 0.50	-0.62	2	5FU SAHA	0.50 0.50	-0.62	0
1382	2	0	0	0.95	0.05	0	0	0	0	2	5FU SAHA	0.50 0.50	-0.62	2	DOX ActD	0.50 0.50	1.06	1.68	atr	2	5FU SAHA	0.50 0.50	-0.62	2	5FU SAHA	0.50 0.50	-0.62	0
1383	2	0	0	0.96	0.04	0	0	0	0	2	5FU SAHA	0.50 0.50	-0.62	2	DOX ActD	0.50 0.50	1.08	1.7	atr	2	5FU SAHA	0.50 0.50	-0.62	2	5FU SAHA	0.50 0.50	-0.62	0
1384	2	0	0	0.97	0.03	0	0	0	0	2	5FU SAHA	0.50 0.50	-0.6	2	DOX ActD	0.50 0.50	1.08	1.68	atr	2	5FU SAHA	0.50 0.50	-0.6	2	5FU SAHA	0.50 0.50	-0.6	0
1385	2	0	0	0.98	0.02	0	0	0	0	2	5FU SAHA	0.50 0.50	-0.6	2	DOX ActD	0.50 0.50	1.1	1.7	atr	2	5FU SAHA	0.50 0.50	-0.6	2	5FU SAHA	0.50 0.50	-0.6	0
1386	2	0	0	0.99	0.01	0	0	0	0	2	5FU SAHA	0.50 0.50	-0.58	2	DOX ActD	0.50 0.50	1.12	1.7	atr	2	5FU SAHA	0.50 0.50	-0.58	2	5FU SAHA	0.50 0.50	-0.58	0
1387	2	0	0	0.01	0	0.99	0	0	0	2	DOX SAHA	0.50 0.50	-2	2	IRT Sunitinib	0.50 0.50	0.34	2.34	atx	2	DOX SAHA	0.50 0.50	-2	2	DOX SAHA	0.50 0.50	-2	0
1388	2	0	0	0.02	0	0.98	0	0	0	2	DOX SAHA	0.50 0.50	-1.98	2	IRT Sunitinib	0.50 0.50	0.34	2.32	atx	2	DOX SAHA	0.50 0.50	-1.98	2	DOX SAHA	0.50 0.50	-1.98	0
1389	2	0	0	0.03	0	0.97	0	0	0	2	DOX SAHA	0.50 0.50	-1.94	2	IRT Sunitinib	0.50 0.50	0.34	2.28	atx	2	DOX SAHA	0.50 0.50	-1.94	2	DOX SAHA	0.50 0.50	-1.94	0
1390	2	0	0	0.04	0	0.96	0	0	0	2	DOX SAHA	0.50 0.50	-1.92	2	IRT Sunitinib	0.50 0.50	0.34	2.26	atx	2	DOX SAHA	0.50 0.50	-1.92	2	DOX SAHA	0.50 0.50	-1.92	0
1391	2	0	0	0.05	0	0.95	0	0	0	2	DOX SAHA	0.50 0.50	-1.9	2	IRT Sunitinib	0.50 0.50	0.34	2.24	atx	2	DOX SAHA	0.50 0.50	-1.9	2	DOX SAHA	0.50 0.50	-1.9	0
1392	2	0	0	0.06	0	0.94	0	0	0	2	DOX SAHA	0.50 0.50	-1.86	2	IRT Sunitinib	0.50 0.50	0.34	2.2	atx	2	DOX SAHA	0.50 0.50	-1.86	2	DOX SAHA	0.50 0.50	-1.86	0
1393	2	0	0	0.07	0	0.93	0	0	0	2	DOX SAHA	0.50 0.50	-1.84	2	IRT Sunitinib	0.50 0.50	0.34	2.18	atx	2	DOX SAHA	0.50 0.50	-1.84	2	DOX SAHA	0.50 0.50	-1.84	0
1394	2	0	0	0.08	0	0.92	0	0	0	2	DOX SAHA	0.50 0.50	-1.82	2	IRT Sunitinib	0.50 0.50	0.34	2.16	atx	2	DOX SAHA	0.50 0.50	-1.82	2	DOX SAHA	0.50 0.50	-1.82	0
1395	2	0	0	0.09	0	0.91	0	0	0	2	DOX SAHA	0.50 0.50	-1.8	2	IRT Sunitinib	0.50 0.50	0.36	2.16	atx	2	DOX SAHA	0.50 0.50	-1.8	2	DOX SAHA	0.50 0.50	-1.8	0
1396	2	0	0	0.1	0	0.9	0	0	0	2	DOX SAHA	0.50 0.50	-1.76	2	IRT Sunitinib	0.50 0.50	0.36	2.12	atx	2	DOX SAHA	0.50 0.50	-1.76	2	DOX SAHA	0.50 0.50	-1.76	0
1397	2	0	0	0.11	0	0.89	0	0	0	2	DOX SAHA	0.50 0.50	-1.74	2	IRT Sunitinib	0.50 0.50	0.36	2.1	atx	2	DOX SAHA	0.50 0.50	-1.74	2	DOX SAHA	0.50 0.50	-1.74	0
1398	2	0	0	0.12	0	0.88	0	0	0	2	DOX SAHA	0.50 0.50	-1.72	2	IRT Sunitinib	0.50 0.50	0.36	2.08	atx	2	DOX SAHA	0.50 0.50	-1.72	2	DOX SAHA	0.50 0.50	-1.72	0
1399	2	0	0	0.13	0	0.87	0	0	0	2	DOX SAHA	0.50 0.50	-1.7	2	IRT Sunitinib	0.50 0.50	0.36	2.06	atx	2	DOX SAHA	0.50 0.50	-1.7	2	DOX SAHA	0.50 0.50	-1.7	0
1400	2	0	0	0.14	0	0.86	0	0	0	2	DOX SAHA	0.50 0.50	-1.66	2	IRT Sunitinib	0.50 0.50	0.36	2.02	atx	2	DOX SAHA	0.50 0.50	-1.66	2	DOX SAHA	0.50 0.50	-1.66	0
1401	2	0	0	0.15	0	0.85	0	0	0	2	DOX SAHA	0.50 0.50	-1.64	2	IRT Sunitinib	0.50 0.50	0.36	2	atx	2	DOX SAHA	0.50 0.50	-1.64	2	DOX SAHA	0.50 0.50	-1.64	0
1402	2	0	0	0.16	0	0.84	0	0	0	2	DOX SAHA	0.50 0.50	-1.62	2	IRT Sunitinib	0.50 0.50	0.36	1.98	atx	2	DOX SAHA	0.50 0.50	-1.62	2	DOX SAHA	0.50 0.50	-1.62	0
1403	2	0	0	0.17	0	0.83	0	0	0	2	DOX SAHA	0.50 0.50	-1.6	2	IRT Sunitinib	0.50 0.50	0.36	1.96	atx	2	DOX SAHA	0.50 0.50	-1.6	2	DOX SAHA	0.50 0.50	-1.6	0
1404	2	0	0	0.18	0	0.82	0	0	0	2	DOX SAHA	0.50 0.50	-1.56	2	IRT Sunitinib	0.50 0.50	0.36	1.92	atx	2	DOX SAHA	0.50 0.50	-1.56	2	DOX SAHA	0.50 0.50	-1.56	0
1405	2	0	0	0.19	0	0.81	0	0	0	2	DOX SAHA	0.50 0.50	-1.54	2	IRT Sunitinib	0.50 0.50	0.36	1.9	atx	2	DOX SAHA	0.50 0.50	-1.54	2	DOX SAHA	0.50 0.50	-1.54	0
1406	2	0	0	0.2	0	0.8	0	0	0	2	DOX SAHA	0.50 0.50	-1.52	2	IRT Sunitinib	0.50 0.50	0.36	1.88	atx	2	DOX SAHA	0.50 0.50	-1.52	2	DOX SAHA	0.50 0.50	-1.52	0
1407	2	0	0	0.21	0	0.79	0	0	0	2	DOX SAHA	0.50 0.50	-1.5	2	IRT Sunitinib	0.50 0.50	0.36	1.86	atx	2	DOX SAHA	0.50 0.50	-1.5	2	DOX SAHA	0.50 0.50	-1.5	0
1408	2	0	0	0.22	0	0.78	0	0	0	2	DOX SAHA	0.50 0.50	-1.46	2	IRT Sunitinib	0.50 0.50	0.36	1.82	atx	2	DOX SAHA	0.50 0.50	-1.46	2	DOX SAHA	0.50 0.50	-1.46	0
1409	2	0	0	0.23	0	0.77	0	0	0	2	DOX SAHA	0.50 0.50	-1.44	2	IRT Sunitinib	0.50 0.50	0.36	1.8	atx	2	DOX SAHA	0.50 0.50	-1.44	2	DOX SAHA	0.50 0.50	-1.44	0
1410	2	0	0	0.24	0	0.76	0	0	0	2	DOX SAHA	0.50 0.50	-1.42	2	IRT Sunitinib	0.50 0.50	0.36	1.78	atx	2	DOX SAHA	0.50 0.50	-1.42	2	DOX SAHA	0.50 0.50	-1.42	0
1411	2	0	0	0.25	0	0.75	0	0	0	2	DOX SAHA	0.50 0.50	-1.38	2	IRT Sunitinib	0.50 0.50	0.36	1.74	atx	2	DOX SAHA	0.50 0.50	-1.38	2	DOX SAHA	0.50 0.50	-1.38	0
1412	2	0	0	0.26	0	0.74	0	0	0	2	DOX SAHA	0.50 0.50	-1.36	2	IRT Sunitinib	0.50 0.50	0.36	1.72	atx	2	DOX SAHA	0.50 0.50	-1.36	2	DOX SAHA	0.50 0.50	-1.36	0
1413	2	0	0	0.27	0	0.73	0	0	0	2	DOX SAHA	0.50 0.50	-1.34	2	IRT Sunitinib	0.50 0.50	0.36	1.7	atx	2	DOX SAHA	0.50 0.50	-1.34	2	DOX SAHA	0.50 0.50	-1.34	0
1414	2	0	0	0.28	0	0.72	0	0	0	2	DOX SAHA	0.50 0.50	-1.32	2	IRT Sunitinib	0.50 0.50	0.36	1.68	atx	2	DOX SAHA	0.50 0.50	-1.32	2	DOX SAHA	0.50 0.50	-1.32	0
1415	2	0	0	0.29	0	0.71	0	0	0	2	DOX SAHA	0.50 0.50	-1.28	2	IRT Sunitinib	0.50 0.50	0.36	1.64	atx	2	DOX SAHA	0.50 0.50	-1.28	2	DOX SAHA	0.50 0.50	-1.28	0
1416	2	0	0	0.3	0	0.7	0	0	0	2	DOX SAHA	0.50 0.50	-1.26	2	IRT Sunitinib	0.50 0.50	0.36	1.62	atx	2	DOX SAHA	0.50 0.50	-1.26	2	DOX SAHA	0.50 0.50	-1.26	0
1417	2	0	0	0.31	0	0.69	0	0	0	2	DOX SAHA	0.50 0.50	-1.24	2	IRT Sunitinib	0.50 0.50	0.36	1.6	atx	2	DOX SAHA	0.50 0.50	-1.24	2	DOX SAHA	0.50 0.50	-1.24	0
1418	2	0	0	0.32	0	0.68	0	0	0	2	DOX SAHA	0.50 0.50	-1.22	2	IRT Sunitinib	0.50 0.50	0.36	1.58	atx	2	DOX SAHA	0.50 0.50	-1.22	2	DOX SAHA	0.50 0.50	-1.22	0
1419	2	0	0	0.33	0	0.67	0	0	0	2	DOX SAHA	0.50 0.50	-1.18	2	IRT Sunitinib	0.50 0.50	0.36	1.54	atx	2	DOX SAHA	0.50 0.50	-1.18	2	DOX SAHA	0.50 0.50	-1.18	0
1420	2	0	0	0.34	0	0.66	0	0	0	2	DOX SAHA	0.50 0.50	-1.16	2	IRT Sunitinib	0.50 0.50	0.36	1.52	atx	2	DOX SAHA	0.50 0.50	-1.16	2	DOX SAHA	0.50 0.50	-1.16	0
1421	2	0	0	0.35	0	0.65	0	0	0	2	CBL SAHA	0.50 0.50	-1.14	2	IRT Sunitinib	0.50 0.50	0.36	1.5	atx	2	DOX SAHA	0.50 0.50	-1.14	2	CBL SAHA	0.50 0.50	-1.14	0
1422	2	0	0	0.36	0	0.64	0	0	0	2	CBL SAHA	0.50 0.50	-1.14	2	IRT Sunitinib	0.50 0.50	0.36	1.5	atx	2	DOX SAHA	0.50 0.50	-1.12	2	CBL SAHA	0.50 0.50	-1.14	0.02
1423	2	0	0	0.37	0	0.63	0	0	0	2	CBL SAHA	0.50 0.50	-1.12	2	IRT Sunitinib	0.50 0.50	0.36	1.48	atx	2	DOX SAHA	0.50 0.50	-1.08	2	CBL SAHA	0.50 0.50	-1.12	0.04
1424	2	0	0	0.38	0	0.62	0	0	0	2	CBL SAHA	0.50 0.50	-1.1	2	IRT Sunitinib	0.50 0.50	0.36	1.46	atx	2	DOX SAHA	0.50 0.50	-1.06	2	CBL SAHA	0.50 0.50	-1.1	0.04
1425	2	0	0	0.39	0	0.61	0	0	0	2	CBL SAHA	0.50 0.50	-1.08	2	IRT Sunitinib	0.50 0.50	0.36	1.44	atx	2	DOX SAHA	0.50 0.50	-1.04	2	CBL SAHA	0.50 0.50	-1.08	0.04
1426	2	0	0	0.4	0	0.6	0	0	0	2	CBL SAHA	0.50 0.50	-1.06	2	IRT Sunitinib	0.50 0.50	0.36	1.42	atx	2	DOX SAHA	0.50 0.50	-1	2	CBL SAHA	0.50 0.50	-1.06	0.06
1427	2	0	0	0.41	0	0.59	0	0	0	2	CBL SAHA	0.50 0.50	-1.06	2	IRT Sunitinib	0.50 0.50	0.36	1.42	atx	2	DOX SAHA	0.50 0.50	-0.98	2	CBL SAHA	0.50 0.50	-1.06	0.08
1428	2	0	0	0.42	0	0.58	0	0	0	2	CBL SAHA	0.50 0.50	-1.04	2	IRT Sunitinib	0.50 0.50	0.36	1.4	atx	2	DOX SAHA	0.50 0.50	-0.96	2	CBL SAHA	0.50 0.50	-1.04	0.08
1429	2	0	0	0.43	0	0.57	0	0	0	2	CBL SAHA	0.50 0.50	-1.02	2	IRT 17AAG	0.50 0.50	0.36	1.38	atx	2	DOX SAHA	0.50 0.50	-0.94	2	CBL SAHA	0.50 0.50	-1.02	0.08
1430	2	0	0	0.44	0	0.56	0	0	0	2	CBL SAHA	0.50 0.50	-1	2	IRT 17AAG	0.50 0.50	0.38	1.38	atx	2	DOX SAHA	0.50 0.50	-0.9	2	CBL SAHA	0.50 0.50	-1	0.1
1431	2	0	0	0.45	0	0.55	0	0	0	2	CBL SAHA	0.50 0.50	-1	2	IRT 17AAG	0.50 0.50	0.38	1.38	atx	2	DOX SAHA	0.50 0.50	-0.88	2	CBL SAHA	0.50 0.50	-1	0.12
1432	2	0	0	0.46	0	0.54	0	0	0	2	CBL SAHA	0.50 0.50	-0.98	2	IRT 17AAG	0.50 0.50	0.38	1.36	atx	2	DOX SAHA	0.50 0.50	-0.86	2	CBL SAHA	0.50 0.50	-0.98	0.12
1433	2	0	0	0.47	0	0.53	0	0	0	2	CBL SAHA	0.50 0.50	-0.96	2	IRT 17AAG	0.50 0.50	0.4	1.36	atx	2	DOX SAHA	0.50 0.50	-0.84	2	CBL SAHA	0.50 0.50	-0.96	0.12
1434	2	0	0	0.48	0	0.52	0	0	0	2	CBL SAHA	0.50 0.50	-0.94	2	IRT 17AAG	0.50 0.50	0.4	1.34	atx	2	DOX SAHA	0.50 0.50	-0.8	2	CBL SAHA	0.50 0.50	-0.94	0.14
1435	2	0	0	0.49	0	0.51	0	0	0	2	CBL SAHA	0.50 0.50	-0.94	2	IRT 17AAG	0.50 0.50	0.4	1.34	atx	2	DOX SAHA	0.50 0.50	-0.78	2	CBL SAHA	0.50 0.50	-0.94	0.16
1436	2	0	0	0.5	0	0.5	0	0	0	2	CBL SAHA	0.50 0.50	-0.92	2	IRT 17AAG	0.50 0.50	0.42	1.34	atx	2	DOX SAHA	0.50 0.50	-0.76	2	CBL SAHA	0.50 0.50	-0.92	0.16
1437	2	0	0	0.51	0	0.49	0	0	0	2	CBL SAHA	0.50 0.50	-0.9	2	IRT 17AAG	0.50 0.50	0.42	1.32	atr	2	5FU SAHA	0.50 0.50	-0.76	2	CBL SAHA	0.50 0.50	-0.9	0.14
1438	2	0	0	0.52	0	0.48	0	0	0	2	CBL SAHA	0.50 0.50	-0.88	2	IRT 17AAG	0.50 0.50	0.44	1.32	atr	2	5FU SAHA	0.50 0.50	-0.76	2	CBL SAHA	0.50 0.50	-0.88	0.12
1439	2	0	0	0.53	0	0.47	0	0	0	2	CBL SAHA	0.50 0.50	-0.88	2	IRT 17AAG	0.50 0.50	0.44	1.32	atr	2	5FU SAHA	0.50 0.50	-0.76	2	CBL SAHA	0.50 0.50	-0.88	0.12
1440	2	0	0	0.54	0	0.46	0	0	0	2	CBL SAHA	0.50 0.50	-0.86	2	IRT 17AAG	0.50 0.50	0.44	1.3	atr	2	5FU SAHA	0.50 0.50	-0.76	2	CBL SAHA	0.50 0.50	-0.86	0.1
1441	2	0	0	0.55	0	0.45	0	0	0	2	CBL SAHA	0.50 0.50	-0.84	2	IRT 17AAG	0.50 0.50	0.46	1.3	atr	2	5FU SAHA	0.50 0.50	-0.74	2	CBL SAHA	0.50 0.50	-0.84	0.1
1442	2	0	0	0.56	0	0.44	0	0	0	2	CBL SAHA	0.50 0.50	-0.82	2	IRT 17AAG	0.50 0.50	0.46	1.28	atr	2	5FU SAHA	0.50 0.50	-0.74	2	CBL SAHA	0.50 0.50	-0.82	0.08
1443	2	0	0	0.57	0	0.43	0	0	0	2	CBL SAHA	0.50 0.50	-0.82	2	IRT 17AAG	0.50 0.50	0.46	1.28	atr	2	5FU SAHA	0.50 0.50	-0.74	2	CBL SAHA	0.50 0.50	-0.82	0.08
1444	2	0	0	0.58	0	0.42	0	0	0	2	CBL SAHA	0.50 0.50	-0.8	2	IRT 17AAG	0.50 0.50	0.48	1.28	atr	2	5FU SAHA	0.50 0.50	-0.74	2	CBL SAHA	0.50 0.50	-0.8	0.06
1445	2	0	0	0.59	0	0.41	0	0	0	2	CBL SAHA	0.50 0.50	-0.78	2	IRT 17AAG	0.50 0.50	0.48	1.26	atr	2	5FU SAHA	0.50 0.50	-0.74	2	CBL SAHA	0.50 0.50	-0.78	0.04
1446	2	0	0	0.6	0	0.4	0	0	0	2	CBL SAHA	0.50 0.50	-0.76	2	IRT 17AAG	0.50 0.50	0.5	1.26	atr	2	5FU SAHA	0.50 0.50	-0.74	2	CBL SAHA	0.50 0.50	-0.76	0.02
1447	2	0	0	0.61	0	0.39	0	0	0	2	CBL SAHA	0.50 0.50	-0.76	2	IRT 17AAG	0.50 0.50	0.5	1.26	atr	2	5FU SAHA	0.50 0.50	-0.72	2	CBL SAHA	0.50 0.50	-0.76	0.04
1448	2	0	0	0.62	0	0.38	0	0	0	2	CBL SAHA	0.50 0.50	-0.74	2	IRT 17AAG	0.50 0.50	0.5	1.24	atr	2	5FU SAHA	0.50 0.50	-0.72	2	CBL SAHA	0.50 0.50	-0.74	0.02
1449	2	0	0	0.63	0	0.37	0	0	0	2	CBL SAHA	0.50 0.50	-0.72	2	IRT 17AAG	0.50 0.50	0.52	1.24	atr	2	5FU SAHA	0.50 0.50	-0.72	2	CBL SAHA	0.50 0.50	-0.72	0
1450	2	0	0	0.64	0	0.36	0	0	0	2	5FU SAHA	0.50 0.50	-0.72	2	IRT 17AAG	0.50 0.50	0.52	1.24	atr	2	5FU SAHA	0.50 0.50	-0.72	2	5FU SAHA	0.50 0.50	-0.72	0
1451	2	0	0	0.65	0	0.35	0	0	0	2	5FU SAHA	0.50 0.50	-0.72	2	IRT 17AAG	0.50 0.50	0.52	1.24	atr	2	5FU SAHA	0.50 0.50	-0.72	2	5FU SAHA	0.50 0.50	-0.72	0
1452	2	0	0	0.66	0	0.34	0	0	0	2	5FU SAHA	0.50 0.50	-0.7	2	IRT 17AAG	0.50 0.50	0.54	1.24	atr	2	5FU SAHA	0.50 0.50	-0.7	2	5FU SAHA	0.50 0.50	-0.7	0
1453	2	0	0	0.67	0	0.33	0	0	0	2	5FU SAHA	0.50 0.50	-0.7	2	IRT 17AAG	0.50 0.50	0.54	1.24	atr	2	5FU SAHA	0.50 0.50	-0.7	2	5FU SAHA	0.50 0.50	-0.7	0
1454	2	0	0	0.68	0	0.32	0	0	0	2	5FU SAHA	0.50 0.50	-0.7	2	IRT 17AAG	0.50 0.50	0.56	1.26	atr	2	5FU SAHA	0.50 0.50	-0.7	2	5FU SAHA	0.50 0.50	-0.7	0
1455	2	0	0	0.69	0	0.31	0	0	0	2	5FU SAHA	0.50 0.50	-0.7	2	IRT 17AAG	0.50 0.50	0.56	1.26	atr	2	5FU SAHA	0.50 0.50	-0.7	2	5FU SAHA	0.50 0.50	-0.7	0
1456	2	0	0	0.7	0	0.3	0	0	0	2	5FU SAHA	0.50 0.50	-0.7	2	IRT 17AAG	0.50 0.50	0.56	1.26	atr	2	5FU SAHA	0.50 0.50	-0.7	2	5FU SAHA	0.50 0.50	-0.7	0
1457	2	0	0	0.71	0	0.29	0	0	0	2	5FU SAHA	0.50 0.50	-0.68	2	IRT 17AAG	0.50 0.50	0.58	1.26	atr	2	5FU SAHA	0.50 0.50	-0.68	2	5FU SAHA	0.50 0.50	-0.68	0
1458	2	0	0	0.72	0	0.28	0	0	0	2	5FU SAHA	0.50 0.50	-0.68	2	IRT 17AAG	0.50 0.50	0.58	1.26	atr	2	5FU SAHA	0.50 0.50	-0.68	2	5FU SAHA	0.50 0.50	-0.68	0
1459	2	0	0	0.73	0	0.27	0	0	0	2	5FU SAHA	0.50 0.50	-0.68	2	IRT 17AAG	0.50 0.50	0.58	1.26	atr	2	5FU SAHA	0.50 0.50	-0.68	2	5FU SAHA	0.50 0.50	-0.68	0
1460	2	0	0	0.74	0	0.26	0	0	0	2	5FU SAHA	0.50 0.50	-0.68	2	IRT 17AAG	0.50 0.50	0.6	1.28	atr	2	5FU SAHA	0.50 0.50	-0.68	2	5FU SAHA	0.50 0.50	-0.68	0
1461	2	0	0	0.75	0	0.25	0	0	0	2	5FU SAHA	0.50 0.50	-0.68	2	IRT 17AAG	0.50 0.50	0.6	1.28	atr	2	5FU SAHA	0.50 0.50	-0.68	2	5FU SAHA	0.50 0.50	-0.68	0
1462	2	0	0	0.76	0	0.24	0	0	0	2	5FU SAHA	0.50 0.50	-0.66	2	DOX IRT	0.50 0.50	0.62	1.28	atr	2	5FU SAHA	0.50 0.50	-0.66	2	5FU SAHA	0.50 0.50	-0.66	0
1463	2	0	0	0.77	0	0.23	0	0	0	2	5FU SAHA	0.50 0.50	-0.66	2	DOX IRT	0.50 0.50	0.64	1.3	atr	2	5FU SAHA	0.50 0.50	-0.66	2	5FU SAHA	0.50 0.50	-0.66	0
1464	2	0	0	0.78	0	0.22	0	0	0	2	5FU SAHA	0.50 0.50	-0.66	2	DOX IRT	0.50 0.50	0.66	1.32	atr	2	5FU SAHA	0.50 0.50	-0.66	2	5FU SAHA	0.50 0.50	-0.66	0
1465	2	0	0	0.79	0	0.21	0	0	0	2	5FU SAHA	0.50 0.50	-0.66	2	DOX IRT	0.50 0.50	0.68	1.34	atr	2	5FU SAHA	0.50 0.50	-0.66	2	5FU SAHA	0.50 0.50	-0.66	0
1466	2	0	0	0.8	0	0.2	0	0	0	2	5FU SAHA	0.50 0.50	-0.66	2	DOX IRT	0.50 0.50	0.7	1.36	atr	2	5FU SAHA	0.50 0.50	-0.66	2	5FU SAHA	0.50 0.50	-0.66	0
1467	2	0	0	0.81	0	0.19	0	0	0	2	5FU SAHA	0.50 0.50	-0.66	2	DOX IRT	0.50 0.50	0.72	1.38	atr	2	5FU SAHA	0.50 0.50	-0.66	2	5FU SAHA	0.50 0.50	-0.66	0
1468	2	0	0	0.82	0	0.18	0	0	0	2	5FU SAHA	0.50 0.50	-0.64	2	DOX IRT	0.50 0.50	0.74	1.38	atr	2	5FU SAHA	0.50 0.50	-0.64	2	5FU SAHA	0.50 0.50	-0.64	0
1469	2	0	0	0.83	0	0.17	0	0	0	2	5FU SAHA	0.50 0.50	-0.64	2	DOX IRT	0.50 0.50	0.76	1.4	atr	2	5FU SAHA	0.50 0.50	-0.64	2	5FU SAHA	0.50 0.50	-0.64	0
1470	2	0	0	0.84	0	0.16	0	0	0	2	5FU SAHA	0.50 0.50	-0.64	2	DOX IRT	0.50 0.50	0.78	1.42	atr	2	5FU SAHA	0.50 0.50	-0.64	2	5FU SAHA	0.50 0.50	-0.64	0
1471	2	0	0	0.85	0	0.15	0	0	0	2	5FU SAHA	0.50 0.50	-0.64	2	DOX IRT	0.50 0.50	0.8	1.44	atr	2	5FU SAHA	0.50 0.50	-0.64	2	5FU SAHA	0.50 0.50	-0.64	0
1472	2	0	0	0.86	0	0.14	0	0	0	2	5FU SAHA	0.50 0.50	-0.64	2	DOX IRT	0.50 0.50	0.82	1.46	atr	2	5FU SAHA	0.50 0.50	-0.64	2	5FU SAHA	0.50 0.50	-0.64	0
1473	2	0	0	0.87	0	0.13	0	0	0	2	5FU SAHA	0.50 0.50	-0.62	2	DOX IRT	0.50 0.50	0.84	1.46	atr	2	5FU SAHA	0.50 0.50	-0.62	2	5FU SAHA	0.50 0.50	-0.62	0
1474	2	0	0	0.88	0	0.12	0	0	0	2	5FU SAHA	0.50 0.50	-0.62	2	DOX IRT	0.50 0.50	0.86	1.48	atr	2	5FU SAHA	0.50 0.50	-0.62	2	5FU SAHA	0.50 0.50	-0.62	0
1475	2	0	0	0.89	0	0.11	0	0	0	2	5FU SAHA	0.50 0.50	-0.62	2	DOX IRT	0.50 0.50	0.86	1.48	atr	2	5FU SAHA	0.50 0.50	-0.62	2	5FU SAHA	0.50 0.50	-0.62	0
1476	2	0	0	0.9	0	0.1	0	0	0	2	5FU SAHA	0.50 0.50	-0.62	2	DOX IRT	0.50 0.50	0.88	1.5	atr	2	5FU SAHA	0.50 0.50	-0.62	2	5FU SAHA	0.50 0.50	-0.62	0
1477	2	0	0	0.91	0	0.09	0	0	0	2	5FU SAHA	0.50 0.50	-0.62	2	DOX IRT	0.50 0.50	0.9	1.52	atr	2	5FU SAHA	0.50 0.50	-0.62	2	5FU SAHA	0.50 0.50	-0.62	0
1478	2	0	0	0.92	0	0.08	0	0	0	2	5FU SAHA	0.50 0.50	-0.6	2	DOX IRT	0.50 0.50	0.92	1.52	atr	2	5FU SAHA	0.50 0.50	-0.6	2	5FU SAHA	0.50 0.50	-0.6	0
1479	2	0	0	0.93	0	0.07	0	0	0	2	5FU SAHA	0.50 0.50	-0.6	2	DOX IRT	0.50 0.50	0.94	1.54	atr	2	5FU SAHA	0.50 0.50	-0.6	2	5FU SAHA	0.50 0.50	-0.6	0
1480	2	0	0	0.94	0	0.06	0	0	0	2	5FU SAHA	0.50 0.50	-0.6	2	DOX IRT	0.50 0.50	0.96	1.56	atr	2	5FU SAHA	0.50 0.50	-0.6	2	5FU SAHA	0.50 0.50	-0.6	0
1481	2	0	0	0.95	0	0.05	0	0	0	2	5FU SAHA	0.50 0.50	-0.6	2	DOX IRT	0.50 0.50	0.98	1.58	atr	2	5FU SAHA	0.50 0.50	-0.6	2	5FU SAHA	0.50 0.50	-0.6	0
1482	2	0	0	0.96	0	0.04	0	0	0	2	5FU SAHA	0.50 0.50	-0.6	2	DOX ActD	0.50 0.50	1	1.6	atr	2	5FU SAHA	0.50 0.50	-0.6	2	5FU SAHA	0.50 0.50	-0.6	0
1483	2	0	0	0.97	0	0.03	0	0	0	2	5FU SAHA	0.50 0.50	-0.6	2	DOX ActD	0.50 0.50	1.04	1.64	atr	2	5FU SAHA	0.50 0.50	-0.6	2	5FU SAHA	0.50 0.50	-0.6	0
1484	2	0	0	0.98	0	0.02	0	0	0	2	5FU SAHA	0.50 0.50	-0.58	2	DOX ActD	0.50 0.50	1.06	1.64	atr	2	5FU SAHA	0.50 0.50	-0.58	2	5FU SAHA	0.50 0.50	-0.58	0
1485	2	0	0	0.99	0	0.01	0	0	0	2	5FU SAHA	0.50 0.50	-0.58	2	DOX ActD	0.50 0.50	1.1	1.68	atr	2	5FU SAHA	0.50 0.50	-0.58	2	5FU SAHA	0.50 0.50	-0.58	0
1486	2	0	0	0.01	0	0	0.99	0	0	2	DOX 17AAG	0.50 0.50	-0.9	2	CBL IRT	0.50 0.50	1.02	1.92	dnapk	2	DOX 17AAG	0.50 0.50	-0.9	2	DOX 17AAG	0.50 0.50	-0.9	0
1487	2	0	0	0.02	0	0	0.98	0	0	2	DOX 17AAG	0.50 0.50	-0.88	2	CBL IRT	0.50 0.50	1	1.88	dnapk	2	DOX 17AAG	0.50 0.50	-0.88	2	DOX 17AAG	0.50 0.50	-0.88	0
1488	2	0	0	0.03	0	0	0.97	0	0	2	DOX 17AAG	0.50 0.50	-0.86	2	CBL IRT	0.50 0.50	1	1.86	dnapk	2	DOX 17AAG	0.50 0.50	-0.86	2	DOX 17AAG	0.50 0.50	-0.86	0
1489	2	0	0	0.04	0	0	0.96	0	0	2	DOX 17AAG	0.50 0.50	-0.86	2	CBL IRT	0.50 0.50	1	1.86	dnapk	2	DOX 17AAG	0.50 0.50	-0.86	2	DOX 17AAG	0.50 0.50	-0.86	0
1490	2	0	0	0.05	0	0	0.95	0	0	2	DOX 17AAG	0.50 0.50	-0.84	2	CBL IRT	0.50 0.50	1	1.84	dnapk	2	DOX 17AAG	0.50 0.50	-0.84	2	DOX 17AAG	0.50 0.50	-0.84	0
1491	2	0	0	0.06	0	0	0.94	0	0	2	DOX 17AAG	0.50 0.50	-0.82	2	CBL IRT	0.50 0.50	0.98	1.8	dnapk	2	DOX 17AAG	0.50 0.50	-0.82	2	DOX 17AAG	0.50 0.50	-0.82	0
1492	2	0	0	0.07	0	0	0.93	0	0	2	DOX 17AAG	0.50 0.50	-0.8	2	CBL IRT	0.50 0.50	0.98	1.78	dnapk	2	DOX 17AAG	0.50 0.50	-0.8	2	DOX 17AAG	0.50 0.50	-0.8	0
1493	2	0	0	0.08	0	0	0.92	0	0	2	DOX 17AAG	0.50 0.50	-0.78	2	CBL IRT	0.50 0.50	0.98	1.76	dnapk	2	DOX 17AAG	0.50 0.50	-0.78	2	DOX 17AAG	0.50 0.50	-0.78	0
1494	2	0	0	0.09	0	0	0.91	0	0	2	DOX 17AAG	0.50 0.50	-0.76	2	CBL IRT	0.50 0.50	0.96	1.72	dnapk	2	DOX 17AAG	0.50 0.50	-0.76	2	DOX 17AAG	0.50 0.50	-0.76	0
1495	2	0	0	0.1	0	0	0.9	0	0	2	DOX 17AAG	0.50 0.50	-0.74	2	CBL IRT	0.50 0.50	0.96	1.7	dnapk	2	DOX 17AAG	0.50 0.50	-0.74	2	DOX 17AAG	0.50 0.50	-0.74	0
1496	2	0	0	0.11	0	0	0.89	0	0	2	DOX 17AAG	0.50 0.50	-0.72	2	CBL IRT	0.50 0.50	0.96	1.68	dnapk	2	DOX 17AAG	0.50 0.50	-0.72	2	DOX 17AAG	0.50 0.50	-0.72	0
1497	2	0	0	0.12	0	0	0.88	0	0	2	DOX 17AAG	0.50 0.50	-0.7	2	CBL IRT	0.50 0.50	0.94	1.64	dnapk	2	DOX 17AAG	0.50 0.50	-0.7	2	DOX 17AAG	0.50 0.50	-0.7	0
1498	2	0	0	0.13	0	0	0.87	0	0	2	DOX 17AAG	0.50 0.50	-0.68	2	CBL IRT	0.50 0.50	0.94	1.62	dnapk	2	DOX 17AAG	0.50 0.50	-0.68	2	DOX 17AAG	0.50 0.50	-0.68	0
1499	2	0	0	0.14	0	0	0.86	0	0	2	DOX 17AAG	0.50 0.50	-0.66	2	CBL IRT	0.50 0.50	0.94	1.6	dnapk	2	DOX 17AAG	0.50 0.50	-0.66	2	DOX 17AAG	0.50 0.50	-0.66	0
1500	2	0	0	0.15	0	0	0.85	0	0	2	DOX 17AAG	0.50 0.50	-0.64	2	CBL IRT	0.50 0.50	0.92	1.56	dnapk	2	DOX 17AAG	0.50 0.50	-0.64	2	DOX 17AAG	0.50 0.50	-0.64	0
1501	2	0	0	0.16	0	0	0.84	0	0	2	DOX 17AAG	0.50 0.50	-0.62	2	CBL IRT	0.50 0.50	0.92	1.54	dnapk	2	DOX 17AAG	0.50 0.50	-0.62	2	DOX 17AAG	0.50 0.50	-0.62	0
1502	2	0	0	0.17	0	0	0.83	0	0	2	DOX 17AAG	0.50 0.50	-0.6	2	CBL IRT	0.50 0.50	0.92	1.52	dnapk	2	DOX 17AAG	0.50 0.50	-0.6	2	DOX 17AAG	0.50 0.50	-0.6	0
1503	2	0	0	0.18	0	0	0.82	0	0	2	DOX 17AAG	0.50 0.50	-0.58	2	CBL IRT	0.50 0.50	0.92	1.5	dnapk	2	DOX 17AAG	0.50 0.50	-0.58	2	DOX 17AAG	0.50 0.50	-0.58	0
1504	2	0	0	0.19	0	0	0.81	0	0	2	DOX 17AAG	0.50 0.50	-0.56	2	CBL IRT	0.50 0.50	0.9	1.46	dnapk	2	DOX 17AAG	0.50 0.50	-0.56	2	DOX 17AAG	0.50 0.50	-0.56	0
1505	2	0	0	0.2	0	0	0.8	0	0	2	DOX 17AAG	0.50 0.50	-0.54	2	CBL IRT	0.50 0.50	0.9	1.44	dnapk	2	DOX 17AAG	0.50 0.50	-0.54	2	DOX 17AAG	0.50 0.50	-0.54	0
1506	2	0	0	0.21	0	0	0.79	0	0	2	DOX 17AAG	0.50 0.50	-0.52	2	CBL IRT	0.50 0.50	0.9	1.42	dnapk	2	DOX 17AAG	0.50 0.50	-0.52	2	DOX 17AAG	0.50 0.50	-0.52	0
1507	2	0	0	0.22	0	0	0.78	0	0	2	DOX 17AAG	0.50 0.50	-0.5	2	CBL IRT	0.50 0.50	0.88	1.38	dnapk	2	DOX 17AAG	0.50 0.50	-0.5	2	DOX 17AAG	0.50 0.50	-0.5	0
1508	2	0	0	0.23	0	0	0.77	0	0	2	DOX 17AAG	0.50 0.50	-0.48	2	CBL IRT	0.50 0.50	0.88	1.36	dnapk	2	DOX 17AAG	0.50 0.50	-0.48	2	DOX 17AAG	0.50 0.50	-0.48	0
1509	2	0	0	0.24	0	0	0.76	0	0	2	DOX 17AAG	0.50 0.50	-0.46	2	CBL IRT	0.50 0.50	0.88	1.34	dnapk	2	DOX 17AAG	0.50 0.50	-0.46	2	DOX 17AAG	0.50 0.50	-0.46	0
1510	2	0	0	0.25	0	0	0.75	0	0	2	DOX 17AAG	0.50 0.50	-0.44	2	CBL IRT	0.50 0.50	0.86	1.3	dnapk	2	DOX 17AAG	0.50 0.50	-0.44	2	DOX 17AAG	0.50 0.50	-0.44	0
1511	2	0	0	0.26	0	0	0.74	0	0	2	DOX 17AAG	0.50 0.50	-0.42	2	CBL IRT	0.50 0.50	0.86	1.28	dnapk	2	DOX 17AAG	0.50 0.50	-0.42	2	DOX 17AAG	0.50 0.50	-0.42	0
1512	2	0	0	0.27	0	0	0.73	0	0	2	DOX 17AAG	0.50 0.50	-0.4	2	CBL IRT	0.50 0.50	0.86	1.26	dnapk	2	DOX 17AAG	0.50 0.50	-0.4	2	DOX 17AAG	0.50 0.50	-0.4	0
1513	2	0	0	0.28	0	0	0.72	0	0	2	DOX 17AAG	0.50 0.50	-0.38	2	IRT Erlotinib	0.50 0.50	0.86	1.24	dnapk	2	DOX 17AAG	0.50 0.50	-0.38	2	DOX 17AAG	0.50 0.50	-0.38	0
1514	2	0	0	0.29	0	0	0.71	0	0	2	DOX 17AAG	0.50 0.50	-0.36	2	IRT Erlotinib	0.50 0.50	0.84	1.2	dnapk	2	DOX 17AAG	0.50 0.50	-0.36	2	DOX 17AAG	0.50 0.50	-0.36	0
1515	2	0	0	0.3	0	0	0.7	0	0	2	DOX 17AAG	0.50 0.50	-0.34	2	IRT Erlotinib	0.50 0.50	0.84	1.18	dnapk	2	DOX 17AAG	0.50 0.50	-0.34	2	DOX 17AAG	0.50 0.50	-0.34	0
1516	2	0	0	0.31	0	0	0.69	0	0	2	DOX 17AAG	0.50 0.50	-0.32	2	IRT Erlotinib	0.50 0.50	0.84	1.16	dnapk	2	DOX 17AAG	0.50 0.50	-0.32	2	DOX 17AAG	0.50 0.50	-0.32	0
1517	2	0	0	0.32	0	0	0.68	0	0	2	DOX 17AAG	0.50 0.50	-0.3	2	IRT Erlotinib	0.50 0.50	0.84	1.14	dnapk	2	DOX 17AAG	0.50 0.50	-0.3	2	DOX 17AAG	0.50 0.50	-0.3	0
1518	2	0	0	0.33	0	0	0.67	0	0	2	DOX 17AAG	0.50 0.50	-0.28	2	IRT Erlotinib	0.50 0.50	0.84	1.12	dnapk	2	DOX 17AAG	0.50 0.50	-0.28	2	DOX 17AAG	0.50 0.50	-0.28	0
1519	2	0	0	0.34	0	0	0.66	0	0	2	DOX 17AAG	0.50 0.50	-0.26	2	IRT Erlotinib	0.50 0.50	0.84	1.1	dnapk	2	DOX 17AAG	0.50 0.50	-0.26	2	DOX 17AAG	0.50 0.50	-0.26	0
1520	2	0	0	0.35	0	0	0.65	0	0	2	DOX 17AAG	0.50 0.50	-0.24	2	IRT Erlotinib	0.50 0.50	0.84	1.08	dnapk	2	DOX 17AAG	0.50 0.50	-0.24	2	DOX 17AAG	0.50 0.50	-0.24	0
1521	2	0	0	0.36	0	0	0.64	0	0	2	DOX 17AAG	0.50 0.50	-0.22	2	IRT Erlotinib	0.50 0.50	0.82	1.04	dnapk	2	DOX 17AAG	0.50 0.50	-0.22	2	DOX 17AAG	0.50 0.50	-0.22	0
1522	2	0	0	0.37	0	0	0.63	0	0	2	DOX 17AAG	0.50 0.50	-0.2	2	IRT Erlotinib	0.50 0.50	0.82	1.02	dnapk	2	DOX 17AAG	0.50 0.50	-0.2	2	DOX 17AAG	0.50 0.50	-0.2	0
1523	2	0	0	0.38	0	0	0.62	0	0	2	DOX 17AAG	0.50 0.50	-0.18	2	IRT Erlotinib	0.50 0.50	0.82	1	dnapk	2	DOX 17AAG	0.50 0.50	-0.18	2	DOX 17AAG	0.50 0.50	-0.18	0
1524	2	0	0	0.39	0	0	0.61	0	0	2	DOX 17AAG	0.50 0.50	-0.16	2	IRT Erlotinib	0.50 0.50	0.82	0.98	dnapk	2	DOX 17AAG	0.50 0.50	-0.16	2	DOX 17AAG	0.50 0.50	-0.16	0
1525	2	0	0	0.4	0	0	0.6	0	0	2	DOX 17AAG	0.50 0.50	-0.14	2	IRT Erlotinib	0.50 0.50	0.82	0.96	dnapk	2	DOX 17AAG	0.50 0.50	-0.14	2	DOX 17AAG	0.50 0.50	-0.14	0
1526	2	0	0	0.41	0	0	0.59	0	0	2	DOX 17AAG	0.50 0.50	-0.14	2	IRT Erlotinib	0.50 0.50	0.82	0.96	dnapk	2	DOX 17AAG	0.50 0.50	-0.14	2	DOX 17AAG	0.50 0.50	-0.14	0
1527	2	0	0	0.42	0	0	0.58	0	0	2	DOX 17AAG	0.50 0.50	-0.12	2	IRT Erlotinib	0.50 0.50	0.82	0.94	dnapk	2	DOX 17AAG	0.50 0.50	-0.12	2	DOX 17AAG	0.50 0.50	-0.12	0
1528	2	0	0	0.43	0	0	0.57	0	0	2	Vin 17AAG	0.50 0.50	-0.1	2	IRT Erlotinib	0.50 0.50	0.8	0.9	dnapk	2	DOX 17AAG	0.50 0.50	-0.1	2	Vin 17AAG	0.50 0.50	-0.1	0
1529	2	0	0	0.44	0	0	0.56	0	0	2	Vin 17AAG	0.50 0.50	-0.08	2	IRT Erlotinib	0.50 0.50	0.8	0.88	dnapk	2	DOX 17AAG	0.50 0.50	-0.08	2	Vin 17AAG	0.50 0.50	-0.08	0
1530	2	0	0	0.45	0	0	0.55	0	0	2	Vin 17AAG	0.50 0.50	-0.08	2	IRT Erlotinib	0.50 0.50	0.8	0.88	dnapk	2	DOX 17AAG	0.50 0.50	-0.06	2	Vin 17AAG	0.50 0.50	-0.08	0.02
1531	2	0	0	0.46	0	0	0.54	0	0	2	Vin 17AAG	0.50 0.50	-0.08	2	IRT Erlotinib	0.50 0.50	0.8	0.88	dnapk	2	DOX 17AAG	0.50 0.50	-0.04	2	Vin 17AAG	0.50 0.50	-0.08	0.04
1532	2	0	0	0.47	0	0	0.53	0	0	2	5FU Vin	0.50 0.50	-0.08	2	IRT Erlotinib	0.50 0.50	0.8	0.88	dnapk	2	DOX 17AAG	0.50 0.50	-0.02	2	5FU Vin	0.50 0.50	-0.08	0.06
1533	2	0	0	0.48	0	0	0.52	0	0	2	5FU Vin	0.50 0.50	-0.08	2	IRT Erlotinib	0.50 0.50	0.8	0.88	dnapk	2	DOX 17AAG	0.50 0.50	0	2	5FU Vin	0.50 0.50	-0.08	0.08
1534	2	0	0	0.49	0	0	0.51	0	0	2	5FU Vin	0.50 0.50	-0.08	2	IRT Erlotinib	0.50 0.50	0.78	0.86	dnapk	2	DOX 17AAG	0.50 0.50	0.02	2	5FU Vin	0.50 0.50	-0.08	0.1
1535	2	0	0	0.5	0	0	0.5	0	0	2	5FU Vin	0.50 0.50	-0.1	2	IRT Erlotinib	0.50 0.50	0.78	0.88	dnapk	2	DOX 17AAG	0.50 0.50	0.04	2	5FU Vin	0.50 0.50	-0.1	0.14
1536	2	0	0	0.51	0	0	0.49	0	0	2	5FU Vin	0.50 0.50	-0.1	2	IRT Erlotinib	0.50 0.50	0.78	0.88	atr	2	5FU SAHA	0.50 0.50	-0.04	2	5FU Vin	0.50 0.50	-0.1	0.06
1537	2	0	0	0.52	0	0	0.48	0	0	2	5FU Vin	0.50 0.50	-0.12	2	IRT Erlotinib	0.50 0.50	0.78	0.9	atr	2	5FU SAHA	0.50 0.50	-0.04	2	5FU Vin	0.50 0.50	-0.12	0.08
1538	2	0	0	0.53	0	0	0.47	0	0	2	5FU Vin	0.50 0.50	-0.12	2	IRT Erlotinib	0.50 0.50	0.78	0.9	atr	2	5FU SAHA	0.50 0.50	-0.06	2	5FU Vin	0.50 0.50	-0.12	0.06
1539	2	0	0	0.54	0	0	0.46	0	0	2	5FU Vin	0.50 0.50	-0.12	2	IRT Erlotinib	0.50 0.50	0.78	0.9	atr	2	5FU SAHA	0.50 0.50	-0.06	2	5FU Vin	0.50 0.50	-0.12	0.06
1540	2	0	0	0.55	0	0	0.45	0	0	2	5FU Vin	0.50 0.50	-0.14	2	IRT ActD	0.50 0.50	0.78	0.92	atr	2	5FU SAHA	0.50 0.50	-0.08	2	5FU Vin	0.50 0.50	-0.14	0.06
1541	2	0	0	0.56	0	0	0.44	0	0	2	5FU Vin	0.50 0.50	-0.14	2	IRT ActD	0.50 0.50	0.78	0.92	atr	2	5FU SAHA	0.50 0.50	-0.08	2	5FU Vin	0.50 0.50	-0.14	0.06
1542	2	0	0	0.57	0	0	0.43	0	0	2	5FU Vin	0.50 0.50	-0.16	2	IRT ActD	0.50 0.50	0.78	0.94	atr	2	5FU SAHA	0.50 0.50	-0.1	2	5FU Vin	0.50 0.50	-0.16	0.06
1543	2	0	0	0.58	0	0	0.42	0	0	2	5FU Vin	0.50 0.50	-0.16	2	IRT ActD	0.50 0.50	0.78	0.94	atr	2	5FU SAHA	0.50 0.50	-0.12	2	5FU Vin	0.50 0.50	-0.16	0.04
1544	2	0	0	0.59	0	0	0.41	0	0	2	5FU Vin	0.50 0.50	-0.16	2	IRT ActD	0.50 0.50	0.78	0.94	atr	2	5FU SAHA	0.50 0.50	-0.12	2	5FU Vin	0.50 0.50	-0.16	0.04
1545	2	0	0	0.6	0	0	0.4	0	0	2	5FU Vin	0.50 0.50	-0.18	2	IRT ActD	0.50 0.50	0.78	0.96	atr	2	5FU SAHA	0.50 0.50	-0.14	2	5FU Vin	0.50 0.50	-0.18	0.04
1546	2	0	0	0.61	0	0	0.39	0	0	2	5FU Vin	0.50 0.50	-0.18	2	IRT ActD	0.50 0.50	0.8	0.98	atr	2	5FU SAHA	0.50 0.50	-0.14	2	5FU Vin	0.50 0.50	-0.18	0.04
1547	2	0	0	0.62	0	0	0.38	0	0	2	5FU Vin	0.50 0.50	-0.2	2	IRT ActD	0.50 0.50	0.8	1	atr	2	5FU SAHA	0.50 0.50	-0.16	2	5FU Vin	0.50 0.50	-0.2	0.04
1548	2	0	0	0.63	0	0	0.37	0	0	2	5FU Vin	0.50 0.50	-0.2	2	IRT ActD	0.50 0.50	0.8	1	atr	2	5FU SAHA	0.50 0.50	-0.16	2	5FU Vin	0.50 0.50	-0.2	0.04
1549	2	0	0	0.64	0	0	0.36	0	0	2	5FU Vin	0.50 0.50	-0.2	2	IRT ActD	0.50 0.50	0.8	1	atr	2	5FU SAHA	0.50 0.50	-0.18	2	5FU Vin	0.50 0.50	-0.2	0.02
1550	2	0	0	0.65	0	0	0.35	0	0	2	5FU Vin	0.50 0.50	-0.22	2	IRT ActD	0.50 0.50	0.8	1.02	atr	2	5FU SAHA	0.50 0.50	-0.18	2	5FU Vin	0.50 0.50	-0.22	0.04
1551	2	0	0	0.66	0	0	0.34	0	0	2	5FU Vin	0.50 0.50	-0.22	2	IRT ActD	0.50 0.50	0.8	1.02	atr	2	5FU SAHA	0.50 0.50	-0.2	2	5FU Vin	0.50 0.50	-0.22	0.02
1552	2	0	0	0.67	0	0	0.33	0	0	2	5FU Vin	0.50 0.50	-0.24	2	IRT ActD	0.50 0.50	0.8	1.04	atr	2	5FU SAHA	0.50 0.50	-0.22	2	5FU Vin	0.50 0.50	-0.24	0.02
1553	2	0	0	0.68	0	0	0.32	0	0	2	5FU Vin	0.50 0.50	-0.24	2	IRT ActD	0.50 0.50	0.82	1.06	atr	2	5FU SAHA	0.50 0.50	-0.22	2	5FU Vin	0.50 0.50	-0.24	0.02
1554	2	0	0	0.69	0	0	0.31	0	0	2	5FU Vin	0.50 0.50	-0.24	2	IRT ActD	0.50 0.50	0.82	1.06	atr	2	5FU SAHA	0.50 0.50	-0.24	2	5FU Vin	0.50 0.50	-0.24	0
1555	2	0	0	0.7	0	0	0.3	0	0	2	5FU Vin	0.50 0.50	-0.26	2	IRT ActD	0.50 0.50	0.82	1.08	atr	2	5FU SAHA	0.50 0.50	-0.24	2	5FU Vin	0.50 0.50	-0.26	0.02
1556	2	0	0	0.71	0	0	0.29	0	0	2	5FU Vin	0.50 0.50	-0.26	2	IRT ActD	0.50 0.50	0.82	1.08	atr	2	5FU SAHA	0.50 0.50	-0.26	2	5FU Vin	0.50 0.50	-0.26	0
1557	2	0	0	0.72	0	0	0.28	0	0	2	5FU Vin	0.50 0.50	-0.28	2	IRT ActD	0.50 0.50	0.82	1.1	atr	2	5FU SAHA	0.50 0.50	-0.26	2	5FU Vin	0.50 0.50	-0.28	0.02
1558	2	0	0	0.73	0	0	0.27	0	0	2	5FU Vin	0.50 0.50	-0.28	2	IRT ActD	0.50 0.50	0.82	1.1	atr	2	5FU SAHA	0.50 0.50	-0.28	2	5FU Vin	0.50 0.50	-0.28	0
1559	2	0	0	0.74	0	0	0.26	0	0	2	5FU SAHA	0.50 0.50	-0.28	2	IRT ActD	0.50 0.50	0.82	1.1	atr	2	5FU SAHA	0.50 0.50	-0.28	2	5FU SAHA	0.50 0.50	-0.28	0
1560	2	0	0	0.75	0	0	0.25	0	0	2	5FU SAHA	0.50 0.50	-0.3	2	IRT ActD	0.50 0.50	0.82	1.12	atr	2	5FU SAHA	0.50 0.50	-0.3	2	5FU SAHA	0.50 0.50	-0.3	0
1561	2	0	0	0.76	0	0	0.24	0	0	2	5FU SAHA	0.50 0.50	-0.32	2	IRT ActD	0.50 0.50	0.84	1.16	atr	2	5FU SAHA	0.50 0.50	-0.32	2	5FU SAHA	0.50 0.50	-0.32	0
1562	2	0	0	0.77	0	0	0.23	0	0	2	5FU SAHA	0.50 0.50	-0.32	2	DOX IRT	0.50 0.50	0.84	1.16	atr	2	5FU SAHA	0.50 0.50	-0.32	2	5FU SAHA	0.50 0.50	-0.32	0
1563	2	0	0	0.78	0	0	0.22	0	0	2	5FU SAHA	0.50 0.50	-0.34	2	DOX IRT	0.50 0.50	0.84	1.18	atr	2	5FU SAHA	0.50 0.50	-0.34	2	5FU SAHA	0.50 0.50	-0.34	0
1564	2	0	0	0.79	0	0	0.21	0	0	2	5FU SAHA	0.50 0.50	-0.34	2	DOX IRT	0.50 0.50	0.86	1.2	atr	2	5FU SAHA	0.50 0.50	-0.34	2	5FU SAHA	0.50 0.50	-0.34	0
1565	2	0	0	0.8	0	0	0.2	0	0	2	5FU SAHA	0.50 0.50	-0.36	2	DOX IRT	0.50 0.50	0.86	1.22	atr	2	5FU SAHA	0.50 0.50	-0.36	2	5FU SAHA	0.50 0.50	-0.36	0
1566	2	0	0	0.81	0	0	0.19	0	0	2	5FU SAHA	0.50 0.50	-0.36	2	DOX IRT	0.50 0.50	0.88	1.24	atr	2	5FU SAHA	0.50 0.50	-0.36	2	5FU SAHA	0.50 0.50	-0.36	0
1567	2	0	0	0.82	0	0	0.18	0	0	2	5FU SAHA	0.50 0.50	-0.38	2	DOX IRT	0.50 0.50	0.9	1.28	atr	2	5FU SAHA	0.50 0.50	-0.38	2	5FU SAHA	0.50 0.50	-0.38	0
1568	2	0	0	0.83	0	0	0.17	0	0	2	5FU SAHA	0.50 0.50	-0.38	2	DOX IRT	0.50 0.50	0.9	1.28	atr	2	5FU SAHA	0.50 0.50	-0.38	2	5FU SAHA	0.50 0.50	-0.38	0
1569	2	0	0	0.84	0	0	0.16	0	0	2	5FU SAHA	0.50 0.50	-0.4	2	DOX IRT	0.50 0.50	0.92	1.32	atr	2	5FU SAHA	0.50 0.50	-0.4	2	5FU SAHA	0.50 0.50	-0.4	0
1570	2	0	0	0.85	0	0	0.15	0	0	2	5FU SAHA	0.50 0.50	-0.42	2	DOX IRT	0.50 0.50	0.92	1.34	atr	2	5FU SAHA	0.50 0.50	-0.42	2	5FU SAHA	0.50 0.50	-0.42	0
1571	2	0	0	0.86	0	0	0.14	0	0	2	5FU SAHA	0.50 0.50	-0.42	2	DOX IRT	0.50 0.50	0.94	1.36	atr	2	5FU SAHA	0.50 0.50	-0.42	2	5FU SAHA	0.50 0.50	-0.42	0
1572	2	0	0	0.87	0	0	0.13	0	0	2	5FU SAHA	0.50 0.50	-0.44	2	DOX IRT	0.50 0.50	0.94	1.38	atr	2	5FU SAHA	0.50 0.50	-0.44	2	5FU SAHA	0.50 0.50	-0.44	0
1573	2	0	0	0.88	0	0	0.12	0	0	2	5FU SAHA	0.50 0.50	-0.44	2	DOX IRT	0.50 0.50	0.96	1.4	atr	2	5FU SAHA	0.50 0.50	-0.44	2	5FU SAHA	0.50 0.50	-0.44	0
1574	2	0	0	0.89	0	0	0.11	0	0	2	5FU SAHA	0.50 0.50	-0.46	2	DOX IRT	0.50 0.50	0.96	1.42	atr	2	5FU SAHA	0.50 0.50	-0.46	2	5FU SAHA	0.50 0.50	-0.46	0
1575	2	0	0	0.9	0	0	0.1	0	0	2	5FU SAHA	0.50 0.50	-0.46	2	DOX IRT	0.50 0.50	0.98	1.44	atr	2	5FU SAHA	0.50 0.50	-0.46	2	5FU SAHA	0.50 0.50	-0.46	0
1576	2	0	0	0.91	0	0	0.09	0	0	2	5FU SAHA	0.50 0.50	-0.48	2	DOX IRT	0.50 0.50	0.98	1.46	atr	2	5FU SAHA	0.50 0.50	-0.48	2	5FU SAHA	0.50 0.50	-0.48	0
1577	2	0	0	0.92	0	0	0.08	0	0	2	5FU SAHA	0.50 0.50	-0.48	2	DOX IRT	0.50 0.50	1	1.48	atr	2	5FU SAHA	0.50 0.50	-0.48	2	5FU SAHA	0.50 0.50	-0.48	0
1578	2	0	0	0.93	0	0	0.07	0	0	2	5FU SAHA	0.50 0.50	-0.5	2	DOX ActD	0.50 0.50	1.02	1.52	atr	2	5FU SAHA	0.50 0.50	-0.5	2	5FU SAHA	0.50 0.50	-0.5	0
1579	2	0	0	0.94	0	0	0.06	0	0	2	5FU SAHA	0.50 0.50	-0.52	2	DOX ActD	0.50 0.50	1.02	1.54	atr	2	5FU SAHA	0.50 0.50	-0.52	2	5FU SAHA	0.50 0.50	-0.52	0
1580	2	0	0	0.95	0	0	0.05	0	0	2	5FU SAHA	0.50 0.50	-0.52	2	DOX ActD	0.50 0.50	1.04	1.56	atr	2	5FU SAHA	0.50 0.50	-0.52	2	5FU SAHA	0.50 0.50	-0.52	0
1581	2	0	0	0.96	0	0	0.04	0	0	2	5FU SAHA	0.50 0.50	-0.54	2	DOX ActD	0.50 0.50	1.06	1.6	atr	2	5FU SAHA	0.50 0.50	-0.54	2	5FU SAHA	0.50 0.50	-0.54	0
1582	2	0	0	0.97	0	0	0.03	0	0	2	5FU SAHA	0.50 0.50	-0.54	2	DOX ActD	0.50 0.50	1.08	1.62	atr	2	5FU SAHA	0.50 0.50	-0.54	2	5FU SAHA	0.50 0.50	-0.54	0
1583	2	0	0	0.98	0	0	0.02	0	0	2	5FU SAHA	0.50 0.50	-0.56	2	DOX ActD	0.50 0.50	1.1	1.66	atr	2	5FU SAHA	0.50 0.50	-0.56	2	5FU SAHA	0.50 0.50	-0.56	0
1584	2	0	0	0.99	0	0	0.01	0	0	2	5FU SAHA	0.50 0.50	-0.56	2	DOX ActD	0.50 0.50	1.1	1.66	atr	2	5FU SAHA	0.50 0.50	-0.56	2	5FU SAHA	0.50 0.50	-0.56	0
1585	2	0	0	0.01	0	0	0	0.99	0	2	CBL Vin	0.50 0.50	-1.44	2	5FU Erlotinib	0.50 0.50	1.46	2.9	bok	2	CBL Vin	0.50 0.50	-1.44	2	CBL Vin	0.50 0.50	-1.44	0
1586	2	0	0	0.02	0	0	0	0.98	0	2	CBL Vin	0.50 0.50	-1.42	2	5FU Erlotinib	0.50 0.50	1.44	2.86	bok	2	CBL Vin	0.50 0.50	-1.42	2	CBL Vin	0.50 0.50	-1.42	0
1587	2	0	0	0.03	0	0	0	0.97	0	2	CBL Vin	0.50 0.50	-1.42	2	5FU Erlotinib	0.50 0.50	1.42	2.84	bok	2	CBL Vin	0.50 0.50	-1.42	2	CBL Vin	0.50 0.50	-1.42	0
1588	2	0	0	0.04	0	0	0	0.96	0	2	CBL Vin	0.50 0.50	-1.4	2	5FU Erlotinib	0.50 0.50	1.4	2.8	bok	2	CBL Vin	0.50 0.50	-1.4	2	CBL Vin	0.50 0.50	-1.4	0
1589	2	0	0	0.05	0	0	0	0.95	0	2	CBL Vin	0.50 0.50	-1.38	2	5FU Erlotinib	0.50 0.50	1.38	2.76	bok	2	CBL Vin	0.50 0.50	-1.38	2	CBL Vin	0.50 0.50	-1.38	0
1590	2	0	0	0.06	0	0	0	0.94	0	2	CBL Vin	0.50 0.50	-1.38	2	5FU Erlotinib	0.50 0.50	1.36	2.74	bok	2	CBL Vin	0.50 0.50	-1.38	2	CBL Vin	0.50 0.50	-1.38	0
1591	2	0	0	0.07	0	0	0	0.93	0	2	CBL Vin	0.50 0.50	-1.36	2	5FU Erlotinib	0.50 0.50	1.34	2.7	bok	2	CBL Vin	0.50 0.50	-1.36	2	CBL Vin	0.50 0.50	-1.36	0
1592	2	0	0	0.08	0	0	0	0.92	0	2	CBL Vin	0.50 0.50	-1.34	2	5FU Erlotinib	0.50 0.50	1.34	2.68	bok	2	CBL Vin	0.50 0.50	-1.34	2	CBL Vin	0.50 0.50	-1.34	0
1593	2	0	0	0.09	0	0	0	0.91	0	2	CBL Vin	0.50 0.50	-1.34	2	5FU Erlotinib	0.50 0.50	1.32	2.66	bok	2	CBL Vin	0.50 0.50	-1.34	2	CBL Vin	0.50 0.50	-1.34	0
1594	2	0	0	0.1	0	0	0	0.9	0	2	CBL Vin	0.50 0.50	-1.32	2	5FU Erlotinib	0.50 0.50	1.3	2.62	bok	2	CBL Vin	0.50 0.50	-1.32	2	CBL Vin	0.50 0.50	-1.32	0
1595	2	0	0	0.11	0	0	0	0.89	0	2	CBL Vin	0.50 0.50	-1.3	2	5FU Erlotinib	0.50 0.50	1.28	2.58	bok	2	CBL Vin	0.50 0.50	-1.3	2	CBL Vin	0.50 0.50	-1.3	0
1596	2	0	0	0.12	0	0	0	0.88	0	2	CBL Vin	0.50 0.50	-1.3	2	5FU Erlotinib	0.50 0.50	1.26	2.56	bok	2	CBL Vin	0.50 0.50	-1.3	2	CBL Vin	0.50 0.50	-1.3	0
1597	2	0	0	0.13	0	0	0	0.87	0	2	CBL Vin	0.50 0.50	-1.28	2	5FU Erlotinib	0.50 0.50	1.24	2.52	bok	2	CBL Vin	0.50 0.50	-1.28	2	CBL Vin	0.50 0.50	-1.28	0
1598	2	0	0	0.14	0	0	0	0.86	0	2	CBL Vin	0.50 0.50	-1.26	2	5FU Erlotinib	0.50 0.50	1.24	2.5	bok	2	CBL Vin	0.50 0.50	-1.26	2	CBL Vin	0.50 0.50	-1.26	0
1599	2	0	0	0.15	0	0	0	0.85	0	2	CBL Vin	0.50 0.50	-1.24	2	5FU Erlotinib	0.50 0.50	1.22	2.46	bok	2	CBL Vin	0.50 0.50	-1.24	2	CBL Vin	0.50 0.50	-1.24	0
1600	2	0	0	0.16	0	0	0	0.84	0	2	CBL Vin	0.50 0.50	-1.24	2	5FU Erlotinib	0.50 0.50	1.2	2.44	bok	2	CBL Vin	0.50 0.50	-1.24	2	CBL Vin	0.50 0.50	-1.24	0
1601	2	0	0	0.17	0	0	0	0.83	0	2	CBL Vin	0.50 0.50	-1.22	2	5FU Erlotinib	0.50 0.50	1.18	2.4	bok	2	CBL Vin	0.50 0.50	-1.22	2	CBL Vin	0.50 0.50	-1.22	0
1602	2	0	0	0.18	0	0	0	0.82	0	2	CBL Vin	0.50 0.50	-1.2	2	5FU Erlotinib	0.50 0.50	1.16	2.36	bok	2	CBL Vin	0.50 0.50	-1.2	2	CBL Vin	0.50 0.50	-1.2	0
1603	2	0	0	0.19	0	0	0	0.81	0	2	CBL Vin	0.50 0.50	-1.2	2	5FU Erlotinib	0.50 0.50	1.14	2.34	bok	2	CBL Vin	0.50 0.50	-1.2	2	CBL Vin	0.50 0.50	-1.2	0
1604	2	0	0	0.2	0	0	0	0.8	0	2	CBL Vin	0.50 0.50	-1.18	2	5FU Erlotinib	0.50 0.50	1.12	2.3	bok	2	CBL Vin	0.50 0.50	-1.18	2	CBL Vin	0.50 0.50	-1.18	0
1605	2	0	0	0.21	0	0	0	0.79	0	2	CBL Vin	0.50 0.50	-1.16	2	5FU Erlotinib	0.50 0.50	1.12	2.28	bok	2	CBL Vin	0.50 0.50	-1.16	2	CBL Vin	0.50 0.50	-1.16	0
1606	2	0	0	0.22	0	0	0	0.78	0	2	CBL Vin	0.50 0.50	-1.16	2	5FU Erlotinib	0.50 0.50	1.1	2.26	bok	2	CBL Vin	0.50 0.50	-1.16	2	CBL Vin	0.50 0.50	-1.16	0
1607	2	0	0	0.23	0	0	0	0.77	0	2	CBL Vin	0.50 0.50	-1.14	2	5FU Erlotinib	0.50 0.50	1.08	2.22	bok	2	CBL Vin	0.50 0.50	-1.14	2	CBL Vin	0.50 0.50	-1.14	0
1608	2	0	0	0.24	0	0	0	0.76	0	2	Vin SAHA	0.50 0.50	-1.12	2	5FU Erlotinib	0.50 0.50	1.06	2.18	bok	2	CBL Vin	0.50 0.50	-1.12	2	Vin SAHA	0.50 0.50	-1.12	0
1609	2	0	0	0.25	0	0	0	0.75	0	2	Vin SAHA	0.50 0.50	-1.12	2	5FU Erlotinib	0.50 0.50	1.04	2.16	bok	2	CBL Vin	0.50 0.50	-1.12	2	Vin SAHA	0.50 0.50	-1.12	0
1610	2	0	0	0.26	0	0	0	0.74	0	2	Vin SAHA	0.50 0.50	-1.1	2	5FU Erlotinib	0.50 0.50	1.02	2.12	bok	2	CBL Vin	0.50 0.50	-1.1	2	Vin SAHA	0.50 0.50	-1.1	0
1611	2	0	0	0.27	0	0	0	0.73	0	2	Vin SAHA	0.50 0.50	-1.08	2	5FU Erlotinib	0.50 0.50	1.02	2.1	bok	2	CBL Vin	0.50 0.50	-1.08	2	Vin SAHA	0.50 0.50	-1.08	0
1612	2	0	0	0.28	0	0	0	0.72	0	2	Vin SAHA	0.50 0.50	-1.08	2	5FU Erlotinib	0.50 0.50	1	2.08	bok	2	CBL Vin	0.50 0.50	-1.06	2	Vin SAHA	0.50 0.50	-1.08	0.02
1613	2	0	0	0.29	0	0	0	0.71	0	2	Vin SAHA	0.50 0.50	-1.06	2	5FU Erlotinib	0.50 0.50	0.98	2.04	bok	2	CBL Vin	0.50 0.50	-1.06	2	Vin SAHA	0.50 0.50	-1.06	0
1614	2	0	0	0.3	0	0	0	0.7	0	2	Vin SAHA	0.50 0.50	-1.06	2	5FU Erlotinib	0.50 0.50	0.96	2.02	bok	2	CBL Vin	0.50 0.50	-1.04	2	Vin SAHA	0.50 0.50	-1.06	0.02
1615	2	0	0	0.31	0	0	0	0.69	0	2	Vin SAHA	0.50 0.50	-1.04	2	5FU Erlotinib	0.50 0.50	0.94	1.98	bok	2	CBL Vin	0.50 0.50	-1.02	2	Vin SAHA	0.50 0.50	-1.04	0.02
1616	2	0	0	0.32	0	0	0	0.68	0	2	Vin SAHA	0.50 0.50	-1.02	2	5FU Erlotinib	0.50 0.50	0.92	1.94	bok	2	CBL Vin	0.50 0.50	-1.02	2	Vin SAHA	0.50 0.50	-1.02	0
1617	2	0	0	0.33	0	0	0	0.67	0	2	Vin SAHA	0.50 0.50	-1.02	2	5FU Erlotinib	0.50 0.50	0.9	1.92	bok	2	CBL Vin	0.50 0.50	-1	2	Vin SAHA	0.50 0.50	-1.02	0.02
1618	2	0	0	0.34	0	0	0	0.66	0	2	Vin SAHA	0.50 0.50	-1	2	5FU Erlotinib	0.50 0.50	0.9	1.9	bok	2	CBL Vin	0.50 0.50	-0.98	2	Vin SAHA	0.50 0.50	-1	0.02
1619	2	0	0	0.35	0	0	0	0.65	0	2	Vin SAHA	0.50 0.50	-1	2	5FU Erlotinib	0.50 0.50	0.88	1.88	bok	2	CBL Vin	0.50 0.50	-0.98	2	Vin SAHA	0.50 0.50	-1	0.02
1620	2	0	0	0.36	0	0	0	0.64	0	2	Vin SAHA	0.50 0.50	-0.98	2	5FU Erlotinib	0.50 0.50	0.86	1.84	bok	2	CBL Vin	0.50 0.50	-0.96	2	Vin SAHA	0.50 0.50	-0.98	0.02
1621	2	0	0	0.37	0	0	0	0.63	0	2	Vin SAHA	0.50 0.50	-0.96	2	5FU Erlotinib	0.50 0.50	0.84	1.8	bok	2	CBL Vin	0.50 0.50	-0.94	2	Vin SAHA	0.50 0.50	-0.96	0.02
1622	2	0	0	0.38	0	0	0	0.62	0	2	Vin SAHA	0.50 0.50	-0.96	2	5FU Erlotinib	0.50 0.50	0.82	1.78	bok	2	CBL Vin	0.50 0.50	-0.94	2	Vin SAHA	0.50 0.50	-0.96	0.02
1623	2	0	0	0.39	0	0	0	0.61	0	2	Vin SAHA	0.50 0.50	-0.94	2	5FU Erlotinib	0.50 0.50	0.8	1.74	bok	2	CBL Vin	0.50 0.50	-0.92	2	Vin SAHA	0.50 0.50	-0.94	0.02
1624	2	0	0	0.4	0	0	0	0.6	0	2	Vin SAHA	0.50 0.50	-0.94	2	5FU Erlotinib	0.50 0.50	0.8	1.74	bok	2	CBL Vin	0.50 0.50	-0.9	2	Vin SAHA	0.50 0.50	-0.94	0.04
1625	2	0	0	0.41	0	0	0	0.59	0	2	Vin SAHA	0.50 0.50	-0.92	2	5FU Erlotinib	0.50 0.50	0.78	1.7	bok	2	CBL Vin	0.50 0.50	-0.9	2	Vin SAHA	0.50 0.50	-0.92	0.02
1626	2	0	0	0.42	0	0	0	0.58	0	2	Vin SAHA	0.50 0.50	-0.9	2	5FU Erlotinib	0.50 0.50	0.76	1.66	bok	2	CBL Vin	0.50 0.50	-0.88	2	Vin SAHA	0.50 0.50	-0.9	0.02
1627	2	0	0	0.43	0	0	0	0.57	0	2	Vin SAHA	0.50 0.50	-0.9	2	5FU Erlotinib	0.50 0.50	0.74	1.64	bok	2	CBL Vin	0.50 0.50	-0.86	2	Vin SAHA	0.50 0.50	-0.9	0.04
1628	2	0	0	0.44	0	0	0	0.56	0	2	Vin SAHA	0.50 0.50	-0.88	2	5FU Erlotinib	0.50 0.50	0.72	1.6	bok	2	CBL Vin	0.50 0.50	-0.84	2	Vin SAHA	0.50 0.50	-0.88	0.04
1629	2	0	0	0.45	0	0	0	0.55	0	2	Vin SAHA	0.50 0.50	-0.88	2	5FU Erlotinib	0.50 0.50	0.7	1.58	bok	2	CBL Vin	0.50 0.50	-0.84	2	Vin SAHA	0.50 0.50	-0.88	0.04
1630	2	0	0	0.46	0	0	0	0.54	0	2	Vin SAHA	0.50 0.50	-0.86	2	5FU Erlotinib	0.50 0.50	0.68	1.54	bok	2	CBL Vin	0.50 0.50	-0.82	2	Vin SAHA	0.50 0.50	-0.86	0.04
1631	2	0	0	0.47	0	0	0	0.53	0	2	Vin SAHA	0.50 0.50	-0.84	2	5FU Erlotinib	0.50 0.50	0.68	1.52	bok	2	CBL Vin	0.50 0.50	-0.8	2	Vin SAHA	0.50 0.50	-0.84	0.04
1632	2	0	0	0.48	0	0	0	0.52	0	2	Vin SAHA	0.50 0.50	-0.84	2	5FU Erlotinib	0.50 0.50	0.66	1.5	bok	2	CBL Vin	0.50 0.50	-0.8	2	Vin SAHA	0.50 0.50	-0.84	0.04
1633	2	0	0	0.49	0	0	0	0.51	0	2	Vin SAHA	0.50 0.50	-0.82	2	5FU Erlotinib	0.50 0.50	0.64	1.46	bok	2	CBL Vin	0.50 0.50	-0.78	2	Vin SAHA	0.50 0.50	-0.82	0.04
1634	2	0	0	0.5	0	0	0	0.5	0	2	Vin SAHA	0.50 0.50	-0.82	2	DOX Erlotinib	0.50 0.50	0.64	1.46	bok	2	CBL Vin	0.50 0.50	-0.76	2	Vin SAHA	0.50 0.50	-0.82	0.06
1635	2	0	0	0.51	0	0	0	0.49	0	2	Vin SAHA	0.50 0.50	-0.8	2	DOX Erlotinib	0.50 0.50	0.64	1.44	atr	2	5FU SAHA	0.50 0.50	-0.02	2	Vin SAHA	0.50 0.50	-0.8	0.78
1636	2	0	0	0.52	0	0	0	0.48	0	2	Vin SAHA	0.50 0.50	-0.78	2	DOX Erlotinib	0.50 0.50	0.64	1.42	atr	2	5FU SAHA	0.50 0.50	-0.04	2	Vin SAHA	0.50 0.50	-0.78	0.74
1637	2	0	0	0.53	0	0	0	0.47	0	2	Vin SAHA	0.50 0.50	-0.78	2	DOX Erlotinib	0.50 0.50	0.66	1.44	atr	2	5FU SAHA	0.50 0.50	-0.04	2	Vin SAHA	0.50 0.50	-0.78	0.74
1638	2	0	0	0.54	0	0	0	0.46	0	2	Vin SAHA	0.50 0.50	-0.76	2	DOX Erlotinib	0.50 0.50	0.66	1.42	atr	2	5FU SAHA	0.50 0.50	-0.06	2	Vin SAHA	0.50 0.50	-0.76	0.7
1639	2	0	0	0.55	0	0	0	0.45	0	2	Vin SAHA	0.50 0.50	-0.76	2	DOX Erlotinib	0.50 0.50	0.66	1.42	atr	2	5FU SAHA	0.50 0.50	-0.06	2	Vin SAHA	0.50 0.50	-0.76	0.7
1640	2	0	0	0.56	0	0	0	0.44	0	2	Vin SAHA	0.50 0.50	-0.74	2	DOX Erlotinib	0.50 0.50	0.66	1.4	atr	2	5FU SAHA	0.50 0.50	-0.08	2	Vin SAHA	0.50 0.50	-0.74	0.66
1641	2	0	0	0.57	0	0	0	0.43	0	2	Vin SAHA	0.50 0.50	-0.72	2	DOX Erlotinib	0.50 0.50	0.68	1.4	atr	2	5FU SAHA	0.50 0.50	-0.08	2	Vin SAHA	0.50 0.50	-0.72	0.64
1642	2	0	0	0.58	0	0	0	0.42	0	2	Vin SAHA	0.50 0.50	-0.72	2	DOX Erlotinib	0.50 0.50	0.68	1.4	atr	2	5FU SAHA	0.50 0.50	-0.1	2	Vin SAHA	0.50 0.50	-0.72	0.62
1643	2	0	0	0.59	0	0	0	0.41	0	2	Vin SAHA	0.50 0.50	-0.7	2	DOX Erlotinib	0.50 0.50	0.68	1.38	atr	2	5FU SAHA	0.50 0.50	-0.12	2	Vin SAHA	0.50 0.50	-0.7	0.58
1644	2	0	0	0.6	0	0	0	0.4	0	2	Vin SAHA	0.50 0.50	-0.7	2	DOX Erlotinib	0.50 0.50	0.68	1.38	atr	2	5FU SAHA	0.50 0.50	-0.12	2	Vin SAHA	0.50 0.50	-0.7	0.58
1645	2	0	0	0.61	0	0	0	0.39	0	2	Vin SAHA	0.50 0.50	-0.68	2	DOX Erlotinib	0.50 0.50	0.68	1.36	atr	2	5FU SAHA	0.50 0.50	-0.14	2	Vin SAHA	0.50 0.50	-0.68	0.54
1646	2	0	0	0.62	0	0	0	0.38	0	2	Vin SAHA	0.50 0.50	-0.66	2	DOX Erlotinib	0.50 0.50	0.7	1.36	atr	2	5FU SAHA	0.50 0.50	-0.14	2	Vin SAHA	0.50 0.50	-0.66	0.52
1647	2	0	0	0.63	0	0	0	0.37	0	2	Vin SAHA	0.50 0.50	-0.66	2	DOX Erlotinib	0.50 0.50	0.7	1.36	atr	2	5FU SAHA	0.50 0.50	-0.16	2	Vin SAHA	0.50 0.50	-0.66	0.5
1648	2	0	0	0.64	0	0	0	0.36	0	2	Vin SAHA	0.50 0.50	-0.64	2	DOX Erlotinib	0.50 0.50	0.7	1.34	atr	2	5FU SAHA	0.50 0.50	-0.16	2	Vin SAHA	0.50 0.50	-0.64	0.48
1649	2	0	0	0.65	0	0	0	0.35	0	2	Vin SAHA	0.50 0.50	-0.64	2	DOX Erlotinib	0.50 0.50	0.7	1.34	atr	2	5FU SAHA	0.50 0.50	-0.18	2	Vin SAHA	0.50 0.50	-0.64	0.46
1650	2	0	0	0.66	0	0	0	0.34	0	2	Vin SAHA	0.50 0.50	-0.62	2	DOX Erlotinib	0.50 0.50	0.72	1.34	atr	2	5FU SAHA	0.50 0.50	-0.2	2	Vin SAHA	0.50 0.50	-0.62	0.42
1651	2	0	0	0.67	0	0	0	0.33	0	2	Vin SAHA	0.50 0.50	-0.6	2	DOX Erlotinib	0.50 0.50	0.72	1.32	atr	2	5FU SAHA	0.50 0.50	-0.2	2	Vin SAHA	0.50 0.50	-0.6	0.4
1652	2	0	0	0.68	0	0	0	0.32	0	2	Vin SAHA	0.50 0.50	-0.6	2	DOX Erlotinib	0.50 0.50	0.72	1.32	atr	2	5FU SAHA	0.50 0.50	-0.22	2	Vin SAHA	0.50 0.50	-0.6	0.38
1653	2	0	0	0.69	0	0	0	0.31	0	2	Vin SAHA	0.50 0.50	-0.58	2	DOX Erlotinib	0.50 0.50	0.72	1.3	atr	2	5FU SAHA	0.50 0.50	-0.22	2	Vin SAHA	0.50 0.50	-0.58	0.36
1654	2	0	0	0.7	0	0	0	0.3	0	2	Vin SAHA	0.50 0.50	-0.58	2	DOX Erlotinib	0.50 0.50	0.72	1.3	atr	2	5FU SAHA	0.50 0.50	-0.24	2	Vin SAHA	0.50 0.50	-0.58	0.34
1655	2	0	0	0.71	0	0	0	0.29	0	2	Vin SAHA	0.50 0.50	-0.56	2	DOX ActD	0.50 0.50	0.74	1.3	atr	2	5FU SAHA	0.50 0.50	-0.24	2	Vin SAHA	0.50 0.50	-0.56	0.32
1656	2	0	0	0.72	0	0	0	0.28	0	2	Vin SAHA	0.50 0.50	-0.54	2	DOX ActD	0.50 0.50	0.74	1.28	atr	2	5FU SAHA	0.50 0.50	-0.26	2	Vin SAHA	0.50 0.50	-0.54	0.28
1657	2	0	0	0.73	0	0	0	0.27	0	2	Vin SAHA	0.50 0.50	-0.54	2	DOX ActD	0.50 0.50	0.76	1.3	atr	2	5FU SAHA	0.50 0.50	-0.28	2	Vin SAHA	0.50 0.50	-0.54	0.26
1658	2	0	0	0.74	0	0	0	0.26	0	2	Vin SAHA	0.50 0.50	-0.52	2	DOX ActD	0.50 0.50	0.78	1.3	atr	2	5FU SAHA	0.50 0.50	-0.28	2	Vin SAHA	0.50 0.50	-0.52	0.24
1659	2	0	0	0.75	0	0	0	0.25	0	2	Vin SAHA	0.50 0.50	-0.52	2	DOX ActD	0.50 0.50	0.78	1.3	atr	2	5FU SAHA	0.50 0.50	-0.3	2	Vin SAHA	0.50 0.50	-0.52	0.22
1660	2	0	0	0.76	0	0	0	0.24	0	2	Vin SAHA	0.50 0.50	-0.5	2	DOX ActD	0.50 0.50	0.8	1.3	atr	2	5FU SAHA	0.50 0.50	-0.3	2	Vin SAHA	0.50 0.50	-0.5	0.2
1661	2	0	0	0.77	0	0	0	0.23	0	2	Vin SAHA	0.50 0.50	-0.48	2	DOX ActD	0.50 0.50	0.82	1.3	atr	2	5FU SAHA	0.50 0.50	-0.32	2	Vin SAHA	0.50 0.50	-0.48	0.16
1662	2	0	0	0.78	0	0	0	0.22	0	2	Vin SAHA	0.50 0.50	-0.48	2	DOX ActD	0.50 0.50	0.82	1.3	atr	2	5FU SAHA	0.50 0.50	-0.32	2	Vin SAHA	0.50 0.50	-0.48	0.16
1663	2	0	0	0.79	0	0	0	0.21	0	2	Vin SAHA	0.50 0.50	-0.46	2	DOX ActD	0.50 0.50	0.84	1.3	atr	2	5FU SAHA	0.50 0.50	-0.34	2	Vin SAHA	0.50 0.50	-0.46	0.12
1664	2	0	0	0.8	0	0	0	0.2	0	2	Vin SAHA	0.50 0.50	-0.46	2	DOX ActD	0.50 0.50	0.86	1.32	atr	2	5FU SAHA	0.50 0.50	-0.36	2	Vin SAHA	0.50 0.50	-0.46	0.1
1665	2	0	0	0.81	0	0	0	0.19	0	2	5FU Vin	0.50 0.50	-0.46	2	DOX ActD	0.50 0.50	0.86	1.32	atr	2	5FU SAHA	0.50 0.50	-0.36	2	5FU Vin	0.50 0.50	-0.46	0.1
1666	2	0	0	0.82	0	0	0	0.18	0	2	5FU Vin	0.50 0.50	-0.46	2	DOX ActD	0.50 0.50	0.88	1.34	atr	2	5FU SAHA	0.50 0.50	-0.38	2	5FU Vin	0.50 0.50	-0.46	0.08
1667	2	0	0	0.83	0	0	0	0.17	0	2	5FU Vin	0.50 0.50	-0.46	2	DOX ActD	0.50 0.50	0.9	1.36	atr	2	5FU SAHA	0.50 0.50	-0.38	2	5FU Vin	0.50 0.50	-0.46	0.08
1668	2	0	0	0.84	0	0	0	0.16	0	2	5FU Vin	0.50 0.50	-0.46	2	DOX ActD	0.50 0.50	0.92	1.38	atr	2	5FU SAHA	0.50 0.50	-0.4	2	5FU Vin	0.50 0.50	-0.46	0.06
1669	2	0	0	0.85	0	0	0	0.15	0	2	5FU Vin	0.50 0.50	-0.46	2	DOX ActD	0.50 0.50	0.92	1.38	atr	2	5FU SAHA	0.50 0.50	-0.4	2	5FU Vin	0.50 0.50	-0.46	0.06
1670	2	0	0	0.86	0	0	0	0.14	0	2	5FU Vin	0.50 0.50	-0.46	2	DOX ActD	0.50 0.50	0.94	1.4	atr	2	5FU SAHA	0.50 0.50	-0.42	2	5FU Vin	0.50 0.50	-0.46	0.04
1671	2	0	0	0.87	0	0	0	0.13	0	2	5FU Vin	0.50 0.50	-0.46	2	DOX ActD	0.50 0.50	0.96	1.42	atr	2	5FU SAHA	0.50 0.50	-0.44	2	5FU Vin	0.50 0.50	-0.46	0.02
1672	2	0	0	0.88	0	0	0	0.12	0	2	5FU Vin	0.50 0.50	-0.46	2	DOX ActD	0.50 0.50	0.96	1.42	atr	2	5FU SAHA	0.50 0.50	-0.44	2	5FU Vin	0.50 0.50	-0.46	0.02
1673	2	0	0	0.89	0	0	0	0.11	0	2	5FU Vin	0.50 0.50	-0.48	2	DOX ActD	0.50 0.50	0.98	1.46	atr	2	5FU SAHA	0.50 0.50	-0.46	2	5FU Vin	0.50 0.50	-0.48	0.02
1674	2	0	0	0.9	0	0	0	0.1	0	2	5FU Vin	0.50 0.50	-0.48	2	DOX ActD	0.50 0.50	1	1.48	atr	2	5FU SAHA	0.50 0.50	-0.46	2	5FU Vin	0.50 0.50	-0.48	0.02
1675	2	0	0	0.91	0	0	0	0.09	0	2	5FU SAHA	0.50 0.50	-0.48	2	DOX ActD	0.50 0.50	1	1.48	atr	2	5FU SAHA	0.50 0.50	-0.48	2	5FU SAHA	0.50 0.50	-0.48	0
1676	2	0	0	0.92	0	0	0	0.08	0	2	5FU SAHA	0.50 0.50	-0.48	2	DOX ActD	0.50 0.50	1.02	1.5	atr	2	5FU SAHA	0.50 0.50	-0.48	2	5FU SAHA	0.50 0.50	-0.48	0
1677	2	0	0	0.93	0	0	0	0.07	0	2	5FU SAHA	0.50 0.50	-0.5	2	DOX ActD	0.50 0.50	1.04	1.54	atr	2	5FU SAHA	0.50 0.50	-0.5	2	5FU SAHA	0.50 0.50	-0.5	0
1678	2	0	0	0.94	0	0	0	0.06	0	2	5FU SAHA	0.50 0.50	-0.52	2	DOX ActD	0.50 0.50	1.04	1.56	atr	2	5FU SAHA	0.50 0.50	-0.52	2	5FU SAHA	0.50 0.50	-0.52	0
1679	2	0	0	0.95	0	0	0	0.05	0	2	5FU SAHA	0.50 0.50	-0.52	2	DOX ActD	0.50 0.50	1.06	1.58	atr	2	5FU SAHA	0.50 0.50	-0.52	2	5FU SAHA	0.50 0.50	-0.52	0
1680	2	0	0	0.96	0	0	0	0.04	0	2	5FU SAHA	0.50 0.50	-0.54	2	DOX ActD	0.50 0.50	1.08	1.62	atr	2	5FU SAHA	0.50 0.50	-0.54	2	5FU SAHA	0.50 0.50	-0.54	0
1681	2	0	0	0.97	0	0	0	0.03	0	2	5FU SAHA	0.50 0.50	-0.54	2	DOX ActD	0.50 0.50	1.08	1.62	atr	2	5FU SAHA	0.50 0.50	-0.54	2	5FU SAHA	0.50 0.50	-0.54	0
1682	2	0	0	0.98	0	0	0	0.02	0	2	5FU SAHA	0.50 0.50	-0.56	2	DOX ActD	0.50 0.50	1.1	1.66	atr	2	5FU SAHA	0.50 0.50	-0.56	2	5FU SAHA	0.50 0.50	-0.56	0
1683	2	0	0	0.99	0	0	0	0.01	0	2	5FU SAHA	0.50 0.50	-0.56	2	DOX ActD	0.50 0.50	1.12	1.68	atr	2	5FU SAHA	0.50 0.50	-0.56	2	5FU SAHA	0.50 0.50	-0.56	0
1684	2	0	0	0.01	0	0	0	0	0.99	2	CBL Vin	0.50 0.50	0.34	2	Erlotinib SAHA	0.50 0.50	2.74	2.4	bim	2	CBL Vin	0.50 0.50	0.34	2	CBL Vin	0.50 0.50	0.34	0
1685	2	0	0	0.02	0	0	0	0	0.98	2	CBL Vin	0.50 0.50	0.34	2	Erlotinib SAHA	0.50 0.50	2.72	2.38	bim	2	CBL Vin	0.50 0.50	0.34	2	CBL Vin	0.50 0.50	0.34	0
1686	2	0	0	0.03	0	0	0	0	0.97	2	CBL Vin	0.50 0.50	0.34	2	Erlotinib SAHA	0.50 0.50	2.68	2.34	bim	2	CBL Vin	0.50 0.50	0.34	2	CBL Vin	0.50 0.50	0.34	0
1687	2	0	0	0.04	0	0	0	0	0.96	2	CBL Vin	0.50 0.50	0.32	2	Erlotinib SAHA	0.50 0.50	2.66	2.34	bim	2	CBL Vin	0.50 0.50	0.32	2	CBL Vin	0.50 0.50	0.32	0
1688	2	0	0	0.05	0	0	0	0	0.95	2	CBL Vin	0.50 0.50	0.32	2	Erlotinib SAHA	0.50 0.50	2.64	2.32	bim	2	CBL Vin	0.50 0.50	0.32	2	CBL Vin	0.50 0.50	0.32	0
1689	2	0	0	0.06	0	0	0	0	0.94	2	CBL Vin	0.50 0.50	0.32	2	Erlotinib SAHA	0.50 0.50	2.6	2.28	bim	2	CBL Vin	0.50 0.50	0.32	2	CBL Vin	0.50 0.50	0.32	0
1690	2	0	0	0.07	0	0	0	0	0.93	2	CBL Vin	0.50 0.50	0.32	2	Erlotinib SAHA	0.50 0.50	2.58	2.26	bim	2	CBL Vin	0.50 0.50	0.32	2	CBL Vin	0.50 0.50	0.32	0
1691	2	0	0	0.08	0	0	0	0	0.92	2	CBL Vin	0.50 0.50	0.32	2	Erlotinib SAHA	0.50 0.50	2.56	2.24	bim	2	CBL Vin	0.50 0.50	0.32	2	CBL Vin	0.50 0.50	0.32	0
1692	2	0	0	0.09	0	0	0	0	0.91	2	CBL Vin	0.50 0.50	0.3	2	Erlotinib SAHA	0.50 0.50	2.52	2.22	bim	2	CBL Vin	0.50 0.50	0.3	2	CBL Vin	0.50 0.50	0.3	0
1693	2	0	0	0.1	0	0	0	0	0.9	2	CBL Vin	0.50 0.50	0.3	2	Erlotinib SAHA	0.50 0.50	2.5	2.2	bim	2	CBL Vin	0.50 0.50	0.3	2	CBL Vin	0.50 0.50	0.3	0
1694	2	0	0	0.11	0	0	0	0	0.89	2	CBL Vin	0.50 0.50	0.3	2	Erlotinib SAHA	0.50 0.50	2.48	2.18	bim	2	CBL Vin	0.50 0.50	0.3	2	CBL Vin	0.50 0.50	0.3	0
1695	2	0	0	0.12	0	0	0	0	0.88	2	CBL Vin	0.50 0.50	0.3	2	Erlotinib SAHA	0.50 0.50	2.44	2.14	bim	2	CBL Vin	0.50 0.50	0.3	2	CBL Vin	0.50 0.50	0.3	0
1696	2	0	0	0.13	0	0	0	0	0.87	2	CBL Vin	0.50 0.50	0.28	2	Erlotinib SAHA	0.50 0.50	2.42	2.14	bim	2	CBL Vin	0.50 0.50	0.28	2	CBL Vin	0.50 0.50	0.28	0
1697	2	0	0	0.14	0	0	0	0	0.86	2	CBL Vin	0.50 0.50	0.28	2	Erlotinib SAHA	0.50 0.50	2.38	2.1	bim	2	CBL Vin	0.50 0.50	0.28	2	CBL Vin	0.50 0.50	0.28	0
1698	2	0	0	0.15	0	0	0	0	0.85	2	CBL Vin	0.50 0.50	0.28	2	Erlotinib SAHA	0.50 0.50	2.36	2.08	bim	2	CBL Vin	0.50 0.50	0.28	2	CBL Vin	0.50 0.50	0.28	0
1699	2	0	0	0.16	0	0	0	0	0.84	2	CBL Vin	0.50 0.50	0.28	2	Erlotinib SAHA	0.50 0.50	2.34	2.06	bim	2	CBL Vin	0.50 0.50	0.28	2	CBL Vin	0.50 0.50	0.28	0
1700	2	0	0	0.17	0	0	0	0	0.83	2	CBL Vin	0.50 0.50	0.28	2	Erlotinib SAHA	0.50 0.50	2.3	2.02	bim	2	CBL Vin	0.50 0.50	0.28	2	CBL Vin	0.50 0.50	0.28	0
1701	2	0	0	0.18	0	0	0	0	0.82	2	CBL Vin	0.50 0.50	0.26	2	Erlotinib SAHA	0.50 0.50	2.28	2.02	bim	2	CBL Vin	0.50 0.50	0.26	2	CBL Vin	0.50 0.50	0.26	0
1702	2	0	0	0.19	0	0	0	0	0.81	2	CBL Vin	0.50 0.50	0.26	2	Erlotinib SAHA	0.50 0.50	2.26	2	bim	2	CBL Vin	0.50 0.50	0.26	2	CBL Vin	0.50 0.50	0.26	0
1703	2	0	0	0.2	0	0	0	0	0.8	2	CBL Vin	0.50 0.50	0.26	2	Erlotinib SAHA	0.50 0.50	2.22	1.96	bim	2	CBL Vin	0.50 0.50	0.26	2	CBL Vin	0.50 0.50	0.26	0
1704	2	0	0	0.21	0	0	0	0	0.79	2	CBL Vin	0.50 0.50	0.26	2	Erlotinib SAHA	0.50 0.50	2.2	1.94	bim	2	CBL Vin	0.50 0.50	0.26	2	CBL Vin	0.50 0.50	0.26	0
1705	2	0	0	0.22	0	0	0	0	0.78	2	CBL Vin	0.50 0.50	0.26	2	Erlotinib SAHA	0.50 0.50	2.18	1.92	bim	2	CBL Vin	0.50 0.50	0.26	2	CBL Vin	0.50 0.50	0.26	0
1706	2	0	0	0.23	0	0	0	0	0.77	2	CBL Vin	0.50 0.50	0.24	2	Erlotinib SAHA	0.50 0.50	2.14	1.9	bim	2	CBL Vin	0.50 0.50	0.24	2	CBL Vin	0.50 0.50	0.24	0
1707	2	0	0	0.24	0	0	0	0	0.76	2	CBL Vin	0.50 0.50	0.24	2	Erlotinib SAHA	0.50 0.50	2.12	1.88	bim	2	CBL Vin	0.50 0.50	0.24	2	CBL Vin	0.50 0.50	0.24	0
1708	2	0	0	0.25	0	0	0	0	0.75	2	CBL Vin	0.50 0.50	0.24	2	Erlotinib SAHA	0.50 0.50	2.1	1.86	bim	2	CBL Vin	0.50 0.50	0.24	2	CBL Vin	0.50 0.50	0.24	0
1709	2	0	0	0.26	0	0	0	0	0.74	2	CBL Vin	0.50 0.50	0.24	2	Erlotinib SAHA	0.50 0.50	2.06	1.82	bim	2	CBL Vin	0.50 0.50	0.24	2	CBL Vin	0.50 0.50	0.24	0
1710	2	0	0	0.27	0	0	0	0	0.73	2	CBL Vin	0.50 0.50	0.24	2	Erlotinib SAHA	0.50 0.50	2.04	1.8	bim	2	CBL Vin	0.50 0.50	0.24	2	CBL Vin	0.50 0.50	0.24	0
1711	2	0	0	0.28	0	0	0	0	0.72	2	CBL Vin	0.50 0.50	0.22	2	Erlotinib SAHA	0.50 0.50	2.02	1.8	bim	2	CBL Vin	0.50 0.50	0.22	2	CBL Vin	0.50 0.50	0.22	0
1712	2	0	0	0.29	0	0	0	0	0.71	2	CBL Vin	0.50 0.50	0.22	2	Erlotinib SAHA	0.50 0.50	1.98	1.76	bim	2	CBL Vin	0.50 0.50	0.22	2	CBL Vin	0.50 0.50	0.22	0
1713	2	0	0	0.3	0	0	0	0	0.7	2	CBL Vin	0.50 0.50	0.22	2	Erlotinib SAHA	0.50 0.50	1.96	1.74	bim	2	CBL Vin	0.50 0.50	0.22	2	CBL Vin	0.50 0.50	0.22	0
1714	2	0	0	0.31	0	0	0	0	0.69	2	CBL Vin	0.50 0.50	0.22	2	Erlotinib SAHA	0.50 0.50	1.92	1.7	bim	2	CBL Vin	0.50 0.50	0.22	2	CBL Vin	0.50 0.50	0.22	0
1715	2	0	0	0.32	0	0	0	0	0.68	2	CBL Vin	0.50 0.50	0.2	2	Erlotinib SAHA	0.50 0.50	1.9	1.7	bim	2	CBL Vin	0.50 0.50	0.2	2	CBL Vin	0.50 0.50	0.2	0
1716	2	0	0	0.33	0	0	0	0	0.67	2	CBL Vin	0.50 0.50	0.2	2	Erlotinib SAHA	0.50 0.50	1.88	1.68	bim	2	CBL Vin	0.50 0.50	0.2	2	CBL Vin	0.50 0.50	0.2	0
1717	2	0	0	0.34	0	0	0	0	0.66	2	CBL Vin	0.50 0.50	0.2	2	Erlotinib SAHA	0.50 0.50	1.84	1.64	bim	2	CBL Vin	0.50 0.50	0.2	2	CBL Vin	0.50 0.50	0.2	0
1718	2	0	0	0.35	0	0	0	0	0.65	2	CBL Vin	0.50 0.50	0.2	2	Erlotinib SAHA	0.50 0.50	1.82	1.62	bim	2	CBL Vin	0.50 0.50	0.2	2	CBL Vin	0.50 0.50	0.2	0
1719	2	0	0	0.36	0	0	0	0	0.64	2	CBL Vin	0.50 0.50	0.2	2	Erlotinib SAHA	0.50 0.50	1.8	1.6	bim	2	CBL Vin	0.50 0.50	0.2	2	CBL Vin	0.50 0.50	0.2	0
1720	2	0	0	0.37	0	0	0	0	0.63	2	CBL Vin	0.50 0.50	0.18	2	Erlotinib SAHA	0.50 0.50	1.76	1.58	bim	2	CBL Vin	0.50 0.50	0.18	2	CBL Vin	0.50 0.50	0.18	0
1721	2	0	0	0.38	0	0	0	0	0.62	2	CBL Vin	0.50 0.50	0.18	2	Erlotinib SAHA	0.50 0.50	1.74	1.56	bim	2	CBL Vin	0.50 0.50	0.18	2	CBL Vin	0.50 0.50	0.18	0
1722	2	0	0	0.39	0	0	0	0	0.61	2	CBL Vin	0.50 0.50	0.18	2	Erlotinib SAHA	0.50 0.50	1.72	1.54	bim	2	CBL Vin	0.50 0.50	0.18	2	CBL Vin	0.50 0.50	0.18	0
1723	2	0	0	0.4	0	0	0	0	0.6	2	CBL Vin	0.50 0.50	0.18	2	Erlotinib SAHA	0.50 0.50	1.68	1.5	bim	2	CBL Vin	0.50 0.50	0.18	2	CBL Vin	0.50 0.50	0.18	0
1724	2	0	0	0.41	0	0	0	0	0.59	2	CBL Vin	0.50 0.50	0.18	2	Erlotinib SAHA	0.50 0.50	1.66	1.48	bim	2	CBL Vin	0.50 0.50	0.18	2	CBL Vin	0.50 0.50	0.18	0
1725	2	0	0	0.42	0	0	0	0	0.58	2	CBL Vin	0.50 0.50	0.16	2	Erlotinib SAHA	0.50 0.50	1.64	1.48	bim	2	CBL Vin	0.50 0.50	0.16	2	CBL Vin	0.50 0.50	0.16	0
1726	2	0	0	0.43	0	0	0	0	0.57	2	CBL Vin	0.50 0.50	0.16	2	Erlotinib SAHA	0.50 0.50	1.6	1.44	bim	2	CBL Vin	0.50 0.50	0.16	2	CBL Vin	0.50 0.50	0.16	0
1727	2	0	0	0.44	0	0	0	0	0.56	2	CBL Vin	0.50 0.50	0.16	2	Erlotinib SAHA	0.50 0.50	1.58	1.42	bim	2	CBL Vin	0.50 0.50	0.16	2	CBL Vin	0.50 0.50	0.16	0
1728	2	0	0	0.45	0	0	0	0	0.55	2	CBL Vin	0.50 0.50	0.16	2	Erlotinib SAHA	0.50 0.50	1.54	1.38	bim	2	CBL Vin	0.50 0.50	0.16	2	CBL Vin	0.50 0.50	0.16	0
1729	2	0	0	0.46	0	0	0	0	0.54	2	CBL Vin	0.50 0.50	0.16	2	Erlotinib SAHA	0.50 0.50	1.52	1.36	bim	2	CBL Vin	0.50 0.50	0.16	2	CBL Vin	0.50 0.50	0.16	0
1730	2	0	0	0.47	0	0	0	0	0.53	2	CBL Vin	0.50 0.50	0.14	2	Erlotinib SAHA	0.50 0.50	1.5	1.36	bim	2	CBL Vin	0.50 0.50	0.14	2	CBL Vin	0.50 0.50	0.14	0
1731	2	0	0	0.48	0	0	0	0	0.52	2	CBL Vin	0.50 0.50	0.14	2	Erlotinib SAHA	0.50 0.50	1.46	1.32	bim	2	CBL Vin	0.50 0.50	0.14	2	CBL Vin	0.50 0.50	0.14	0
1732	2	0	0	0.49	0	0	0	0	0.51	2	CBL Vin	0.50 0.50	0.14	2	Erlotinib SAHA	0.50 0.50	1.44	1.3	bim	2	CBL Vin	0.50 0.50	0.14	2	CBL Vin	0.50 0.50	0.14	0
1733	2	0	0	0.5	0	0	0	0	0.5	2	CBL Vin	0.50 0.50	0.14	2	Erlotinib SAHA	0.50 0.50	1.42	1.28	bim	2	CBL Vin	0.50 0.50	0.14	2	CBL Vin	0.50 0.50	0.14	0
1734	2	0	0	0.51	0	0	0	0	0.49	2	CBL Vin	0.50 0.50	0.14	2	Erlotinib SAHA	0.50 0.50	1.38	1.24	atr	2	5FU SAHA	0.50 0.50	0.86	2	CBL Vin	0.50 0.50	0.14	0.72
1735	2	0	0	0.52	0	0	0	0	0.48	2	CBL Vin	0.50 0.50	0.12	2	Erlotinib SAHA	0.50 0.50	1.36	1.24	atr	2	5FU SAHA	0.50 0.50	0.82	2	CBL Vin	0.50 0.50	0.12	0.7
1736	2	0	0	0.53	0	0	0	0	0.47	2	CBL Vin	0.50 0.50	0.12	2	Erlotinib SAHA	0.50 0.50	1.34	1.22	atr	2	5FU SAHA	0.50 0.50	0.8	2	CBL Vin	0.50 0.50	0.12	0.68
1737	2	0	0	0.54	0	0	0	0	0.46	2	CBL Vin	0.50 0.50	0.12	2	DOX Erlotinib	0.50 0.50	1.32	1.2	atr	2	5FU SAHA	0.50 0.50	0.78	2	CBL Vin	0.50 0.50	0.12	0.66
1738	2	0	0	0.55	0	0	0	0	0.45	2	CBL Vin	0.50 0.50	0.12	2	DOX Erlotinib	0.50 0.50	1.3	1.18	atr	2	5FU SAHA	0.50 0.50	0.74	2	CBL Vin	0.50 0.50	0.12	0.62
1739	2	0	0	0.56	0	0	0	0	0.44	2	CBL Vin	0.50 0.50	0.1	2	DOX Erlotinib	0.50 0.50	1.3	1.2	atr	2	5FU SAHA	0.50 0.50	0.72	2	CBL Vin	0.50 0.50	0.1	0.62
1740	2	0	0	0.57	0	0	0	0	0.43	2	CBL Vin	0.50 0.50	0.1	2	DOX Erlotinib	0.50 0.50	1.28	1.18	atr	2	5FU SAHA	0.50 0.50	0.68	2	CBL Vin	0.50 0.50	0.1	0.58
1741	2	0	0	0.58	0	0	0	0	0.42	2	CBL Vin	0.50 0.50	0.1	2	DOX Erlotinib	0.50 0.50	1.28	1.18	atr	2	5FU SAHA	0.50 0.50	0.66	2	CBL Vin	0.50 0.50	0.1	0.56
1742	2	0	0	0.59	0	0	0	0	0.41	2	CBL Vin	0.50 0.50	0.1	2	DOX Erlotinib	0.50 0.50	1.26	1.16	atr	2	5FU SAHA	0.50 0.50	0.62	2	CBL Vin	0.50 0.50	0.1	0.52
1743	2	0	0	0.6	0	0	0	0	0.4	2	CBL Vin	0.50 0.50	0.1	2	DOX Erlotinib	0.50 0.50	1.26	1.16	atr	2	5FU SAHA	0.50 0.50	0.6	2	CBL Vin	0.50 0.50	0.1	0.5
1744	2	0	0	0.61	0	0	0	0	0.39	2	5FU Vin	0.50 0.50	0.08	2	DOX Erlotinib	0.50 0.50	1.24	1.16	atr	2	5FU SAHA	0.50 0.50	0.56	2	5FU Vin	0.50 0.50	0.08	0.48
1745	2	0	0	0.62	0	0	0	0	0.38	2	5FU Vin	0.50 0.50	0.06	2	DOX Erlotinib	0.50 0.50	1.24	1.18	atr	2	5FU SAHA	0.50 0.50	0.54	2	5FU Vin	0.50 0.50	0.06	0.48
1746	2	0	0	0.63	0	0	0	0	0.37	2	5FU Vin	0.50 0.50	0.04	2	DOX Erlotinib	0.50 0.50	1.22	1.18	atr	2	5FU SAHA	0.50 0.50	0.5	2	5FU Vin	0.50 0.50	0.04	0.46
1747	2	0	0	0.64	0	0	0	0	0.36	2	5FU Vin	0.50 0.50	0.04	2	DOX Erlotinib	0.50 0.50	1.22	1.18	atr	2	5FU SAHA	0.50 0.50	0.48	2	5FU Vin	0.50 0.50	0.04	0.44
1748	2	0	0	0.65	0	0	0	0	0.35	2	5FU Vin	0.50 0.50	0.02	2	DOX Erlotinib	0.50 0.50	1.2	1.18	atr	2	5FU SAHA	0.50 0.50	0.44	2	5FU Vin	0.50 0.50	0.02	0.42
1749	2	0	0	0.66	0	0	0	0	0.34	2	5FU Vin	0.50 0.50	0	2	DOX Erlotinib	0.50 0.50	1.2	1.2	atr	2	5FU SAHA	0.50 0.50	0.42	2	5FU Vin	0.50 0.50	0	0.42
1750	2	0	0	0.67	0	0	0	0	0.33	2	5FU Vin	0.50 0.50	-0.02	2	DOX Erlotinib	0.50 0.50	1.18	1.2	atr	2	5FU SAHA	0.50 0.50	0.38	2	5FU Vin	0.50 0.50	-0.02	0.4
1751	2	0	0	0.68	0	0	0	0	0.32	2	5FU Vin	0.50 0.50	-0.02	2	DOX Erlotinib	0.50 0.50	1.18	1.2	atr	2	5FU SAHA	0.50 0.50	0.36	2	5FU Vin	0.50 0.50	-0.02	0.38
1752	2	0	0	0.69	0	0	0	0	0.31	2	5FU Vin	0.50 0.50	-0.04	2	DOX Erlotinib	0.50 0.50	1.18	1.22	atr	2	5FU SAHA	0.50 0.50	0.34	2	5FU Vin	0.50 0.50	-0.04	0.38
1753	2	0	0	0.7	0	0	0	0	0.3	2	5FU Vin	0.50 0.50	-0.06	2	DOX Erlotinib	0.50 0.50	1.16	1.22	atr	2	5FU SAHA	0.50 0.50	0.3	2	5FU Vin	0.50 0.50	-0.06	0.36
1754	2	0	0	0.71	0	0	0	0	0.29	2	5FU Vin	0.50 0.50	-0.06	2	DOX Erlotinib	0.50 0.50	1.16	1.22	atr	2	5FU SAHA	0.50 0.50	0.28	2	5FU Vin	0.50 0.50	-0.06	0.34
1755	2	0	0	0.72	0	0	0	0	0.28	2	5FU Vin	0.50 0.50	-0.08	2	DOX Erlotinib	0.50 0.50	1.14	1.22	atr	2	5FU SAHA	0.50 0.50	0.24	2	5FU Vin	0.50 0.50	-0.08	0.32
1756	2	0	0	0.73	0	0	0	0	0.27	2	5FU Vin	0.50 0.50	-0.1	2	DOX Erlotinib	0.50 0.50	1.14	1.24	atr	2	5FU SAHA	0.50 0.50	0.22	2	5FU Vin	0.50 0.50	-0.1	0.32
1757	2	0	0	0.74	0	0	0	0	0.26	2	5FU Vin	0.50 0.50	-0.12	2	DOX Erlotinib	0.50 0.50	1.12	1.24	atr	2	5FU SAHA	0.50 0.50	0.18	2	5FU Vin	0.50 0.50	-0.12	0.3
1758	2	0	0	0.75	0	0	0	0	0.25	2	5FU Vin	0.50 0.50	-0.12	2	DOX Erlotinib	0.50 0.50	1.12	1.24	atr	2	5FU SAHA	0.50 0.50	0.16	2	5FU Vin	0.50 0.50	-0.12	0.28
1759	2	0	0	0.76	0	0	0	0	0.24	2	5FU Vin	0.50 0.50	-0.14	2	DOX IRT	0.50 0.50	1.1	1.24	atr	2	5FU SAHA	0.50 0.50	0.12	2	5FU Vin	0.50 0.50	-0.14	0.26
1760	2	0	0	0.77	0	0	0	0	0.23	2	5FU Vin	0.50 0.50	-0.16	2	DOX IRT	0.50 0.50	1.1	1.26	atr	2	5FU SAHA	0.50 0.50	0.1	2	5FU Vin	0.50 0.50	-0.16	0.26
1761	2	0	0	0.78	0	0	0	0	0.22	2	5FU Vin	0.50 0.50	-0.18	2	DOX IRT	0.50 0.50	1.1	1.28	atr	2	5FU SAHA	0.50 0.50	0.06	2	5FU Vin	0.50 0.50	-0.18	0.24
1762	2	0	0	0.79	0	0	0	0	0.21	2	5FU Vin	0.50 0.50	-0.18	2	DOX IRT	0.50 0.50	1.1	1.28	atr	2	5FU SAHA	0.50 0.50	0.04	2	5FU Vin	0.50 0.50	-0.18	0.22
1763	2	0	0	0.8	0	0	0	0	0.2	2	5FU Vin	0.50 0.50	-0.2	2	DOX IRT	0.50 0.50	1.1	1.3	atr	2	5FU SAHA	0.50 0.50	0	2	5FU Vin	0.50 0.50	-0.2	0.2
1764	2	0	0	0.81	0	0	0	0	0.19	2	5FU Vin	0.50 0.50	-0.22	2	DOX IRT	0.50 0.50	1.1	1.32	atr	2	5FU SAHA	0.50 0.50	-0.02	2	5FU Vin	0.50 0.50	-0.22	0.2
1765	2	0	0	0.82	0	0	0	0	0.18	2	5FU Vin	0.50 0.50	-0.24	2	DOX IRT	0.50 0.50	1.1	1.34	atr	2	5FU SAHA	0.50 0.50	-0.06	2	5FU Vin	0.50 0.50	-0.24	0.18
1766	2	0	0	0.83	0	0	0	0	0.17	2	5FU Vin	0.50 0.50	-0.24	2	DOX IRT	0.50 0.50	1.1	1.34	atr	2	5FU SAHA	0.50 0.50	-0.08	2	5FU Vin	0.50 0.50	-0.24	0.16
1767	2	0	0	0.84	0	0	0	0	0.16	2	5FU Vin	0.50 0.50	-0.26	2	DOX IRT	0.50 0.50	1.1	1.36	atr	2	5FU SAHA	0.50 0.50	-0.1	2	5FU Vin	0.50 0.50	-0.26	0.16
1768	2	0	0	0.85	0	0	0	0	0.15	2	5FU Vin	0.50 0.50	-0.28	2	DOX IRT	0.50 0.50	1.1	1.38	atr	2	5FU SAHA	0.50 0.50	-0.14	2	5FU Vin	0.50 0.50	-0.28	0.14
1769	2	0	0	0.86	0	0	0	0	0.14	2	5FU Vin	0.50 0.50	-0.28	2	DOX IRT	0.50 0.50	1.1	1.38	atr	2	5FU SAHA	0.50 0.50	-0.16	2	5FU Vin	0.50 0.50	-0.28	0.12
1770	2	0	0	0.87	0	0	0	0	0.13	2	5FU Vin	0.50 0.50	-0.3	2	DOX IRT	0.50 0.50	1.1	1.4	atr	2	5FU SAHA	0.50 0.50	-0.2	2	5FU Vin	0.50 0.50	-0.3	0.1
1771	2	0	0	0.88	0	0	0	0	0.12	2	5FU Vin	0.50 0.50	-0.32	2	DOX IRT	0.50 0.50	1.1	1.42	atr	2	5FU SAHA	0.50 0.50	-0.22	2	5FU Vin	0.50 0.50	-0.32	0.1
1772	2	0	0	0.89	0	0	0	0	0.11	2	5FU Vin	0.50 0.50	-0.34	2	DOX IRT	0.50 0.50	1.1	1.44	atr	2	5FU SAHA	0.50 0.50	-0.26	2	5FU Vin	0.50 0.50	-0.34	0.08
1773	2	0	0	0.9	0	0	0	0	0.1	2	5FU Vin	0.50 0.50	-0.34	2	DOX ActD	0.50 0.50	1.1	1.44	atr	2	5FU SAHA	0.50 0.50	-0.28	2	5FU Vin	0.50 0.50	-0.34	0.06
1774	2	0	0	0.91	0	0	0	0	0.09	2	5FU Vin	0.50 0.50	-0.36	2	DOX ActD	0.50 0.50	1.1	1.46	atr	2	5FU SAHA	0.50 0.50	-0.32	2	5FU Vin	0.50 0.50	-0.36	0.04
1775	2	0	0	0.92	0	0	0	0	0.08	2	5FU Vin	0.50 0.50	-0.38	2	DOX ActD	0.50 0.50	1.1	1.48	atr	2	5FU SAHA	0.50 0.50	-0.34	2	5FU Vin	0.50 0.50	-0.38	0.04
1776	2	0	0	0.93	0	0	0	0	0.07	2	5FU Vin	0.50 0.50	-0.4	2	DOX ActD	0.50 0.50	1.1	1.5	atr	2	5FU SAHA	0.50 0.50	-0.38	2	5FU Vin	0.50 0.50	-0.4	0.02
1777	2	0	0	0.94	0	0	0	0	0.06	2	5FU Vin	0.50 0.50	-0.4	2	DOX ActD	0.50 0.50	1.1	1.5	atr	2	5FU SAHA	0.50 0.50	-0.4	2	5FU Vin	0.50 0.50	-0.4	0
1778	2	0	0	0.95	0	0	0	0	0.05	2	5FU SAHA	0.50 0.50	-0.44	2	DOX ActD	0.50 0.50	1.12	1.56	atr	2	5FU SAHA	0.50 0.50	-0.44	2	5FU SAHA	0.50 0.50	-0.44	0
1779	2	0	0	0.96	0	0	0	0	0.04	2	5FU SAHA	0.50 0.50	-0.46	2	DOX ActD	0.50 0.50	1.12	1.58	atr	2	5FU SAHA	0.50 0.50	-0.46	2	5FU SAHA	0.50 0.50	-0.46	0
1780	2	0	0	0.97	0	0	0	0	0.03	2	5FU SAHA	0.50 0.50	-0.5	2	DOX ActD	0.50 0.50	1.12	1.62	atr	2	5FU SAHA	0.50 0.50	-0.5	2	5FU SAHA	0.50 0.50	-0.5	0
1781	2	0	0	0.98	0	0	0	0	0.02	2	5FU SAHA	0.50 0.50	-0.52	2	DOX ActD	0.50 0.50	1.12	1.64	atr	2	5FU SAHA	0.50 0.50	-0.52	2	5FU SAHA	0.50 0.50	-0.52	0
1782	2	0	0	0.99	0	0	0	0	0.01	2	5FU SAHA	0.50 0.50	-0.54	2	DOX ActD	0.50 0.50	1.12	1.66	atr	2	5FU SAHA	0.50 0.50	-0.54	2	5FU SAHA	0.50 0.50	-0.54	0
1783	2	0	0	0	0.01	0.99	0	0	0	2	DOX SAHA	0.50 0.50	-2	2	IRT Sunitinib	0.50 0.50	0.34	2.34	atx	2	DOX SAHA	0.50 0.50	-2	2	DOX SAHA	0.50 0.50	-2	0
1784	2	0	0	0	0.02	0.98	0	0	0	2	DOX SAHA	0.50 0.50	-1.98	2	IRT Sunitinib	0.50 0.50	0.32	2.3	atx	2	DOX SAHA	0.50 0.50	-1.98	2	DOX SAHA	0.50 0.50	-1.98	0
1785	2	0	0	0	0.03	0.97	0	0	0	2	DOX SAHA	0.50 0.50	-1.98	2	IRT Sunitinib	0.50 0.50	0.32	2.3	atx	2	DOX SAHA	0.50 0.50	-1.98	2	DOX SAHA	0.50 0.50	-1.98	0
1786	2	0	0	0	0.04	0.96	0	0	0	2	DOX SAHA	0.50 0.50	-1.96	2	IRT Sunitinib	0.50 0.50	0.32	2.28	atx	2	DOX SAHA	0.50 0.50	-1.96	2	DOX SAHA	0.50 0.50	-1.96	0
1787	2	0	0	0	0.05	0.95	0	0	0	2	DOX SAHA	0.50 0.50	-1.94	2	IRT Sunitinib	0.50 0.50	0.3	2.24	atx	2	DOX SAHA	0.50 0.50	-1.94	2	DOX SAHA	0.50 0.50	-1.94	0
1788	2	0	0	0	0.06	0.94	0	0	0	2	DOX SAHA	0.50 0.50	-1.92	2	IRT Sunitinib	0.50 0.50	0.3	2.22	atx	2	DOX SAHA	0.50 0.50	-1.92	2	DOX SAHA	0.50 0.50	-1.92	0
1789	2	0	0	0	0.07	0.93	0	0	0	2	DOX SAHA	0.50 0.50	-1.9	2	IRT Sunitinib	0.50 0.50	0.28	2.18	atx	2	DOX SAHA	0.50 0.50	-1.9	2	DOX SAHA	0.50 0.50	-1.9	0
1790	2	0	0	0	0.08	0.92	0	0	0	2	DOX SAHA	0.50 0.50	-1.9	2	IRT Sunitinib	0.50 0.50	0.28	2.18	atx	2	DOX SAHA	0.50 0.50	-1.9	2	DOX SAHA	0.50 0.50	-1.9	0
1791	2	0	0	0	0.09	0.91	0	0	0	2	DOX SAHA	0.50 0.50	-1.88	2	IRT Sunitinib	0.50 0.50	0.26	2.14	atx	2	DOX SAHA	0.50 0.50	-1.88	2	DOX SAHA	0.50 0.50	-1.88	0
1792	2	0	0	0	0.1	0.9	0	0	0	2	DOX SAHA	0.50 0.50	-1.86	2	IRT Sunitinib	0.50 0.50	0.26	2.12	atx	2	DOX SAHA	0.50 0.50	-1.86	2	DOX SAHA	0.50 0.50	-1.86	0
1793	2	0	0	0	0.11	0.89	0	0	0	2	DOX SAHA	0.50 0.50	-1.84	2	IRT Sunitinib	0.50 0.50	0.24	2.08	atx	2	DOX SAHA	0.50 0.50	-1.84	2	DOX SAHA	0.50 0.50	-1.84	0
1794	2	0	0	0	0.12	0.88	0	0	0	2	DOX SAHA	0.50 0.50	-1.82	2	IRT Sunitinib	0.50 0.50	0.24	2.06	atx	2	DOX SAHA	0.50 0.50	-1.82	2	DOX SAHA	0.50 0.50	-1.82	0
1795	2	0	0	0	0.13	0.87	0	0	0	2	DOX SAHA	0.50 0.50	-1.82	2	IRT Sunitinib	0.50 0.50	0.22	2.04	atx	2	DOX SAHA	0.50 0.50	-1.82	2	DOX SAHA	0.50 0.50	-1.82	0
1796	2	0	0	0	0.14	0.86	0	0	0	2	DOX SAHA	0.50 0.50	-1.8	2	IRT Sunitinib	0.50 0.50	0.22	2.02	atx	2	DOX SAHA	0.50 0.50	-1.8	2	DOX SAHA	0.50 0.50	-1.8	0
1797	2	0	0	0	0.15	0.85	0	0	0	2	DOX SAHA	0.50 0.50	-1.78	2	IRT Sunitinib	0.50 0.50	0.2	1.98	atx	2	DOX SAHA	0.50 0.50	-1.78	2	DOX SAHA	0.50 0.50	-1.78	0
1798	2	0	0	0	0.16	0.84	0	0	0	2	DOX SAHA	0.50 0.50	-1.76	2	IRT Sunitinib	0.50 0.50	0.2	1.96	atx	2	DOX SAHA	0.50 0.50	-1.76	2	DOX SAHA	0.50 0.50	-1.76	0
1799	2	0	0	0	0.17	0.83	0	0	0	2	DOX SAHA	0.50 0.50	-1.74	2	IRT Sunitinib	0.50 0.50	0.18	1.92	atx	2	DOX SAHA	0.50 0.50	-1.74	2	DOX SAHA	0.50 0.50	-1.74	0
1800	2	0	0	0	0.18	0.82	0	0	0	2	DOX SAHA	0.50 0.50	-1.74	2	IRT Sunitinib	0.50 0.50	0.18	1.92	atx	2	DOX SAHA	0.50 0.50	-1.74	2	DOX SAHA	0.50 0.50	-1.74	0
1801	2	0	0	0	0.19	0.81	0	0	0	2	DOX SAHA	0.50 0.50	-1.72	2	IRT Sunitinib	0.50 0.50	0.16	1.88	atx	2	DOX SAHA	0.50 0.50	-1.72	2	DOX SAHA	0.50 0.50	-1.72	0
1802	2	0	0	0	0.2	0.8	0	0	0	2	DOX SAHA	0.50 0.50	-1.7	2	IRT Sunitinib	0.50 0.50	0.16	1.86	atx	2	DOX SAHA	0.50 0.50	-1.7	2	DOX SAHA	0.50 0.50	-1.7	0
1803	2	0	0	0	0.21	0.79	0	0	0	2	DOX SAHA	0.50 0.50	-1.68	2	IRT Sunitinib	0.50 0.50	0.16	1.84	atx	2	DOX SAHA	0.50 0.50	-1.68	2	DOX SAHA	0.50 0.50	-1.68	0
1804	2	0	0	0	0.22	0.78	0	0	0	2	DOX SAHA	0.50 0.50	-1.66	2	IRT Sunitinib	0.50 0.50	0.14	1.8	atx	2	DOX SAHA	0.50 0.50	-1.66	2	DOX SAHA	0.50 0.50	-1.66	0
1805	2	0	0	0	0.23	0.77	0	0	0	2	DOX SAHA	0.50 0.50	-1.66	2	IRT Sunitinib	0.50 0.50	0.14	1.8	atx	2	DOX SAHA	0.50 0.50	-1.66	2	DOX SAHA	0.50 0.50	-1.66	0
1806	2	0	0	0	0.24	0.76	0	0	0	2	DOX SAHA	0.50 0.50	-1.64	2	IRT Sunitinib	0.50 0.50	0.12	1.76	atx	2	DOX SAHA	0.50 0.50	-1.64	2	DOX SAHA	0.50 0.50	-1.64	0
1807	2	0	0	0	0.25	0.75	0	0	0	2	DOX SAHA	0.50 0.50	-1.62	2	IRT Sunitinib	0.50 0.50	0.12	1.74	atx	2	DOX SAHA	0.50 0.50	-1.62	2	DOX SAHA	0.50 0.50	-1.62	0
1808	2	0	0	0	0.26	0.74	0	0	0	2	DOX SAHA	0.50 0.50	-1.6	2	IRT Sunitinib	0.50 0.50	0.1	1.7	atx	2	DOX SAHA	0.50 0.50	-1.6	2	DOX SAHA	0.50 0.50	-1.6	0
1809	2	0	0	0	0.27	0.73	0	0	0	2	DOX SAHA	0.50 0.50	-1.58	2	IRT Sunitinib	0.50 0.50	0.1	1.68	atx	2	DOX SAHA	0.50 0.50	-1.58	2	DOX SAHA	0.50 0.50	-1.58	0
1810	2	0	0	0	0.28	0.72	0	0	0	2	DOX SAHA	0.50 0.50	-1.58	2	IRT Sunitinib	0.50 0.50	0.08	1.66	atx	2	DOX SAHA	0.50 0.50	-1.58	2	DOX SAHA	0.50 0.50	-1.58	0
1811	2	0	0	0	0.29	0.71	0	0	0	2	DOX SAHA	0.50 0.50	-1.56	2	IRT Sunitinib	0.50 0.50	0.08	1.64	atx	2	DOX SAHA	0.50 0.50	-1.56	2	DOX SAHA	0.50 0.50	-1.56	0
1812	2	0	0	0	0.3	0.7	0	0	0	2	DOX SAHA	0.50 0.50	-1.54	2	IRT Sunitinib	0.50 0.50	0.06	1.6	atx	2	DOX SAHA	0.50 0.50	-1.54	2	DOX SAHA	0.50 0.50	-1.54	0
1813	2	0	0	0	0.31	0.69	0	0	0	2	DOX SAHA	0.50 0.50	-1.52	2	IRT Sunitinib	0.50 0.50	0.06	1.58	atx	2	DOX SAHA	0.50 0.50	-1.52	2	DOX SAHA	0.50 0.50	-1.52	0
1814	2	0	0	0	0.32	0.68	0	0	0	2	DOX SAHA	0.50 0.50	-1.5	2	IRT Sunitinib	0.50 0.50	0.04	1.54	atx	2	DOX SAHA	0.50 0.50	-1.5	2	DOX SAHA	0.50 0.50	-1.5	0
1815	2	0	0	0	0.33	0.67	0	0	0	2	DOX SAHA	0.50 0.50	-1.5	2	IRT Sunitinib	0.50 0.50	0.04	1.54	atx	2	DOX SAHA	0.50 0.50	-1.5	2	DOX SAHA	0.50 0.50	-1.5	0
1816	2	0	0	0	0.34	0.66	0	0	0	2	DOX SAHA	0.50 0.50	-1.48	2	IRT Sunitinib	0.50 0.50	0.02	1.5	atx	2	DOX SAHA	0.50 0.50	-1.48	2	DOX SAHA	0.50 0.50	-1.48	0
1817	2	0	0	0	0.35	0.65	0	0	0	2	DOX SAHA	0.50 0.50	-1.46	2	IRT Sunitinib	0.50 0.50	0.02	1.48	atx	2	DOX SAHA	0.50 0.50	-1.46	2	DOX SAHA	0.50 0.50	-1.46	0
1818	2	0	0	0	0.36	0.64	0	0	0	2	CBL SAHA	0.50 0.50	-1.46	2	IRT Sunitinib	0.50 0.50	0	1.46	atx	2	DOX SAHA	0.50 0.50	-1.44	2	CBL SAHA	0.50 0.50	-1.46	0.02
1819	2	0	0	0	0.37	0.63	0	0	0	2	CBL SAHA	0.50 0.50	-1.44	2	IRT Sunitinib	0.50 0.50	0	1.44	atx	2	DOX SAHA	0.50 0.50	-1.42	2	CBL SAHA	0.50 0.50	-1.44	0.02
1820	2	0	0	0	0.38	0.62	0	0	0	2	CBL SAHA	0.50 0.50	-1.44	2	IRT Sunitinib	0.50 0.50	0	1.44	atx	2	DOX SAHA	0.50 0.50	-1.4	2	CBL SAHA	0.50 0.50	-1.44	0.04
1821	2	0	0	0	0.39	0.61	0	0	0	2	CBL SAHA	0.50 0.50	-1.44	2	IRT Sunitinib	0.50 0.50	-0.02	1.42	atx	2	DOX SAHA	0.50 0.50	-1.4	2	CBL SAHA	0.50 0.50	-1.44	0.04
1822	2	0	0	0	0.4	0.6	0	0	0	2	CBL SAHA	0.50 0.50	-1.42	2	IRT Sunitinib	0.50 0.50	-0.02	1.4	atx	2	DOX SAHA	0.50 0.50	-1.38	2	CBL SAHA	0.50 0.50	-1.42	0.04
1823	2	0	0	0	0.41	0.59	0	0	0	2	CBL SAHA	0.50 0.50	-1.42	2	IRT Sunitinib	0.50 0.50	-0.04	1.38	atx	2	DOX SAHA	0.50 0.50	-1.36	2	CBL SAHA	0.50 0.50	-1.42	0.06
1824	2	0	0	0	0.42	0.58	0	0	0	2	CBL SAHA	0.50 0.50	-1.42	2	IRT Sunitinib	0.50 0.50	-0.04	1.38	atx	2	DOX SAHA	0.50 0.50	-1.34	2	CBL SAHA	0.50 0.50	-1.42	0.08
1825	2	0	0	0	0.43	0.57	0	0	0	2	CBL SAHA	0.50 0.50	-1.4	2	IRT Sunitinib	0.50 0.50	-0.06	1.34	atx	2	DOX SAHA	0.50 0.50	-1.32	2	CBL SAHA	0.50 0.50	-1.4	0.08
1826	2	0	0	0	0.44	0.56	0	0	0	2	CBL SAHA	0.50 0.50	-1.4	2	IRT Sunitinib	0.50 0.50	-0.06	1.34	atx	2	DOX SAHA	0.50 0.50	-1.32	2	CBL SAHA	0.50 0.50	-1.4	0.08
1827	2	0	0	0	0.45	0.55	0	0	0	2	CBL SAHA	0.50 0.50	-1.4	2	IRT Sunitinib	0.50 0.50	-0.08	1.32	atx	2	DOX SAHA	0.50 0.50	-1.3	2	CBL SAHA	0.50 0.50	-1.4	0.1
1828	2	0	0	0	0.46	0.54	0	0	0	2	CBL SAHA	0.50 0.50	-1.38	2	IRT Sunitinib	0.50 0.50	-0.08	1.3	atx	2	DOX SAHA	0.50 0.50	-1.28	2	CBL SAHA	0.50 0.50	-1.38	0.1
1829	2	0	0	0	0.47	0.53	0	0	0	2	CBL SAHA	0.50 0.50	-1.38	2	IRT Sunitinib	0.50 0.50	-0.1	1.28	atx	2	DOX SAHA	0.50 0.50	-1.26	2	CBL SAHA	0.50 0.50	-1.38	0.12
1830	2	0	0	0	0.48	0.52	0	0	0	2	CBL SAHA	0.50 0.50	-1.38	2	IRT Sunitinib	0.50 0.50	-0.1	1.28	atx	2	DOX SAHA	0.50 0.50	-1.24	2	CBL SAHA	0.50 0.50	-1.38	0.14
1831	2	0	0	0	0.49	0.51	0	0	0	2	CBL SAHA	0.50 0.50	-1.36	2	IRT Sunitinib	0.50 0.50	-0.12	1.24	atx	2	DOX SAHA	0.50 0.50	-1.24	2	CBL SAHA	0.50 0.50	-1.36	0.12
1832	2	0	0	0	0.5	0.5	0	0	0	2	CBL SAHA	0.50 0.50	-1.36	2	IRT Sunitinib	0.50 0.50	-0.12	1.24	atx	2	DOX SAHA	0.50 0.50	-1.22	2	CBL SAHA	0.50 0.50	-1.36	0.14
1833	2	0	0	0	0.51	0.49	0	0	0	2	CBL SAHA	0.50 0.50	-1.36	2	IRT Sunitinib	0.50 0.50	-0.14	1.22	chk1	2	CBL 5FU	0.50 0.50	-1.18	2	CBL SAHA	0.50 0.50	-1.36	0.18
1834	2	0	0	0	0.52	0.48	0	0	0	2	CBL SAHA	0.50 0.50	-1.36	2	IRT Sunitinib	0.50 0.50	-0.14	1.22	chk1	2	CBL 5FU	0.50 0.50	-1.18	2	CBL SAHA	0.50 0.50	-1.36	0.18
1835	2	0	0	0	0.53	0.47	0	0	0	2	CBL SAHA	0.50 0.50	-1.34	2	Sunitinib 17AAG	0.50 0.50	-0.14	1.2	chk1	2	CBL 5FU	0.50 0.50	-1.2	2	CBL SAHA	0.50 0.50	-1.34	0.14
1836	2	0	0	0	0.54	0.46	0	0	0	2	CBL SAHA	0.50 0.50	-1.34	2	Sunitinib 17AAG	0.50 0.50	-0.14	1.2	chk1	2	CBL 5FU	0.50 0.50	-1.2	2	CBL SAHA	0.50 0.50	-1.34	0.14
1837	2	0	0	0	0.55	0.45	0	0	0	2	CBL SAHA	0.50 0.50	-1.34	2	Sunitinib 17AAG	0.50 0.50	-0.16	1.18	chk1	2	CBL 5FU	0.50 0.50	-1.22	2	CBL SAHA	0.50 0.50	-1.34	0.12
1838	2	0	0	0	0.56	0.44	0	0	0	2	CBL SAHA	0.50 0.50	-1.32	2	Sunitinib 17AAG	0.50 0.50	-0.16	1.16	chk1	2	CBL 5FU	0.50 0.50	-1.22	2	CBL SAHA	0.50 0.50	-1.32	0.1
1839	2	0	0	0	0.57	0.43	0	0	0	2	CBL SAHA	0.50 0.50	-1.32	2	Sunitinib 17AAG	0.50 0.50	-0.16	1.16	chk1	2	CBL 5FU	0.50 0.50	-1.24	2	CBL SAHA	0.50 0.50	-1.32	0.08
1840	2	0	0	0	0.58	0.42	0	0	0	2	CBL SAHA	0.50 0.50	-1.32	2	Sunitinib 17AAG	0.50 0.50	-0.16	1.16	chk1	2	CBL 5FU	0.50 0.50	-1.24	2	CBL SAHA	0.50 0.50	-1.32	0.08
1841	2	0	0	0	0.59	0.41	0	0	0	2	CBL SAHA	0.50 0.50	-1.3	2	Sunitinib 17AAG	0.50 0.50	-0.16	1.14	chk1	2	CBL 5FU	0.50 0.50	-1.26	2	CBL SAHA	0.50 0.50	-1.3	0.04
1842	2	0	0	0	0.6	0.4	0	0	0	2	CBL SAHA	0.50 0.50	-1.3	2	Sunitinib 17AAG	0.50 0.50	-0.16	1.14	chk1	2	CBL 5FU	0.50 0.50	-1.26	2	CBL SAHA	0.50 0.50	-1.3	0.04
1843	2	0	0	0	0.61	0.39	0	0	0	2	CBL SAHA	0.50 0.50	-1.3	2	Sunitinib 17AAG	0.50 0.50	-0.18	1.12	chk1	2	CBL 5FU	0.50 0.50	-1.28	2	CBL SAHA	0.50 0.50	-1.3	0.02
1844	2	0	0	0	0.62	0.38	0	0	0	2	CBL SAHA	0.50 0.50	-1.28	2	Sunitinib 17AAG	0.50 0.50	-0.18	1.1	chk1	2	CBL 5FU	0.50 0.50	-1.28	2	CBL SAHA	0.50 0.50	-1.28	0
1845	2	0	0	0	0.63	0.37	0	0	0	2	CBL 5FU	0.50 0.50	-1.3	2	Sunitinib 17AAG	0.50 0.50	-0.18	1.12	chk1	2	CBL 5FU	0.50 0.50	-1.3	2	CBL 5FU	0.50 0.50	-1.3	0
1846	2	0	0	0	0.64	0.36	0	0	0	2	CBL 5FU	0.50 0.50	-1.3	2	Sunitinib 17AAG	0.50 0.50	-0.18	1.12	chk1	2	CBL 5FU	0.50 0.50	-1.3	2	CBL 5FU	0.50 0.50	-1.3	0
1847	2	0	0	0	0.65	0.35	0	0	0	2	CBL 5FU	0.50 0.50	-1.32	2	Sunitinib 17AAG	0.50 0.50	-0.18	1.14	chk1	2	CBL 5FU	0.50 0.50	-1.32	2	CBL 5FU	0.50 0.50	-1.32	0
1848	2	0	0	0	0.66	0.34	0	0	0	2	CBL 5FU	0.50 0.50	-1.32	2	Sunitinib 17AAG	0.50 0.50	-0.2	1.12	chk1	2	CBL 5FU	0.50 0.50	-1.32	2	CBL 5FU	0.50 0.50	-1.32	0
1849	2	0	0	0	0.67	0.33	0	0	0	2	CBL 5FU	0.50 0.50	-1.34	2	Sunitinib 17AAG	0.50 0.50	-0.2	1.14	chk1	2	CBL 5FU	0.50 0.50	-1.34	2	CBL 5FU	0.50 0.50	-1.34	0
1850	2	0	0	0	0.68	0.32	0	0	0	2	CBL 5FU	0.50 0.50	-1.34	2	Sunitinib 17AAG	0.50 0.50	-0.2	1.14	chk1	2	CBL 5FU	0.50 0.50	-1.34	2	CBL 5FU	0.50 0.50	-1.34	0
1851	2	0	0	0	0.69	0.31	0	0	0	2	CBL 5FU	0.50 0.50	-1.36	2	Sunitinib 17AAG	0.50 0.50	-0.2	1.16	chk1	2	CBL 5FU	0.50 0.50	-1.36	2	CBL 5FU	0.50 0.50	-1.36	0
1852	2	0	0	0	0.7	0.3	0	0	0	2	CBL 5FU	0.50 0.50	-1.36	2	Sunitinib 17AAG	0.50 0.50	-0.2	1.16	chk1	2	CBL 5FU	0.50 0.50	-1.36	2	CBL 5FU	0.50 0.50	-1.36	0
1853	2	0	0	0	0.71	0.29	0	0	0	2	CBL 5FU	0.50 0.50	-1.38	2	Sunitinib 17AAG	0.50 0.50	-0.2	1.18	chk1	2	CBL 5FU	0.50 0.50	-1.38	2	CBL 5FU	0.50 0.50	-1.38	0
1854	2	0	0	0	0.72	0.28	0	0	0	2	CBL 5FU	0.50 0.50	-1.38	2	Sunitinib 17AAG	0.50 0.50	-0.22	1.16	chk1	2	CBL 5FU	0.50 0.50	-1.38	2	CBL 5FU	0.50 0.50	-1.38	0
1855	2	0	0	0	0.73	0.27	0	0	0	2	CBL 5FU	0.50 0.50	-1.4	2	Sunitinib 17AAG	0.50 0.50	-0.22	1.18	chk1	2	CBL 5FU	0.50 0.50	-1.4	2	CBL 5FU	0.50 0.50	-1.4	0
1856	2	0	0	0	0.74	0.26	0	0	0	2	CBL 5FU	0.50 0.50	-1.4	2	Sunitinib 17AAG	0.50 0.50	-0.22	1.18	chk1	2	CBL 5FU	0.50 0.50	-1.4	2	CBL 5FU	0.50 0.50	-1.4	0
1857	2	0	0	0	0.75	0.25	0	0	0	2	CBL 5FU	0.50 0.50	-1.42	2	Sunitinib 17AAG	0.50 0.50	-0.22	1.2	chk1	2	CBL 5FU	0.50 0.50	-1.42	2	CBL 5FU	0.50 0.50	-1.42	0
1858	2	0	0	0	0.76	0.24	0	0	0	2	CBL 5FU	0.50 0.50	-1.42	2	Sunitinib 17AAG	0.50 0.50	-0.22	1.2	chk1	2	CBL 5FU	0.50 0.50	-1.42	2	CBL 5FU	0.50 0.50	-1.42	0
1859	2	0	0	0	0.77	0.23	0	0	0	2	CBL 5FU	0.50 0.50	-1.44	2	DOX Sunitinib	0.50 0.50	-0.22	1.22	chk1	2	CBL 5FU	0.50 0.50	-1.44	2	CBL 5FU	0.50 0.50	-1.44	0
1860	2	0	0	0	0.78	0.22	0	0	0	2	CBL 5FU	0.50 0.50	-1.44	2	DOX Sunitinib	0.50 0.50	-0.22	1.22	chk1	2	CBL 5FU	0.50 0.50	-1.44	2	CBL 5FU	0.50 0.50	-1.44	0
1861	2	0	0	0	0.79	0.21	0	0	0	2	CBL 5FU	0.50 0.50	-1.46	2	DOX Sunitinib	0.50 0.50	-0.2	1.26	chk1	2	CBL 5FU	0.50 0.50	-1.46	2	CBL 5FU	0.50 0.50	-1.46	0
1862	2	0	0	0	0.8	0.2	0	0	0	2	CBL 5FU	0.50 0.50	-1.46	2	DOX Sunitinib	0.50 0.50	-0.2	1.26	chk1	2	CBL 5FU	0.50 0.50	-1.46	2	CBL 5FU	0.50 0.50	-1.46	0
1863	2	0	0	0	0.81	0.19	0	0	0	2	CBL 5FU	0.50 0.50	-1.48	2	DOX Sunitinib	0.50 0.50	-0.2	1.28	chk1	2	CBL 5FU	0.50 0.50	-1.48	2	CBL 5FU	0.50 0.50	-1.48	0
1864	2	0	0	0	0.82	0.18	0	0	0	2	CBL 5FU	0.50 0.50	-1.5	2	DOX Sunitinib	0.50 0.50	-0.18	1.32	chk1	2	CBL 5FU	0.50 0.50	-1.5	2	CBL 5FU	0.50 0.50	-1.5	0
1865	2	0	0	0	0.83	0.17	0	0	0	2	CBL 5FU	0.50 0.50	-1.5	2	DOX Sunitinib	0.50 0.50	-0.18	1.32	chk1	2	CBL 5FU	0.50 0.50	-1.5	2	CBL 5FU	0.50 0.50	-1.5	0
1866	2	0	0	0	0.84	0.16	0	0	0	2	CBL 5FU	0.50 0.50	-1.52	2	DOX Sunitinib	0.50 0.50	-0.16	1.36	chk1	2	CBL 5FU	0.50 0.50	-1.52	2	CBL 5FU	0.50 0.50	-1.52	0
1867	2	0	0	0	0.85	0.15	0	0	0	2	CBL 5FU	0.50 0.50	-1.52	2	DOX Sunitinib	0.50 0.50	-0.16	1.36	chk1	2	CBL 5FU	0.50 0.50	-1.52	2	CBL 5FU	0.50 0.50	-1.52	0
1868	2	0	0	0	0.86	0.14	0	0	0	2	CBL 5FU	0.50 0.50	-1.54	2	DOX Sunitinib	0.50 0.50	-0.16	1.38	chk1	2	CBL 5FU	0.50 0.50	-1.54	2	CBL 5FU	0.50 0.50	-1.54	0
1869	2	0	0	0	0.87	0.13	0	0	0	2	CBL 5FU	0.50 0.50	-1.54	2	DOX Sunitinib	0.50 0.50	-0.14	1.4	chk1	2	CBL 5FU	0.50 0.50	-1.54	2	CBL 5FU	0.50 0.50	-1.54	0
1870	2	0	0	0	0.88	0.12	0	0	0	2	CBL 5FU	0.50 0.50	-1.56	2	DOX Sunitinib	0.50 0.50	-0.14	1.42	chk1	2	CBL 5FU	0.50 0.50	-1.56	2	CBL 5FU	0.50 0.50	-1.56	0
1871	2	0	0	0	0.89	0.11	0	0	0	2	CBL 5FU	0.50 0.50	-1.56	2	DOX Sunitinib	0.50 0.50	-0.12	1.44	chk1	2	CBL 5FU	0.50 0.50	-1.56	2	CBL 5FU	0.50 0.50	-1.56	0
1872	2	0	0	0	0.9	0.1	0	0	0	2	CBL 5FU	0.50 0.50	-1.58	2	DOX Sunitinib	0.50 0.50	-0.12	1.46	chk1	2	CBL 5FU	0.50 0.50	-1.58	2	CBL 5FU	0.50 0.50	-1.58	0
1873	2	0	0	0	0.91	0.09	0	0	0	2	CBL 5FU	0.50 0.50	-1.58	2	DOX Sunitinib	0.50 0.50	-0.12	1.46	chk1	2	CBL 5FU	0.50 0.50	-1.58	2	CBL 5FU	0.50 0.50	-1.58	0
1874	2	0	0	0	0.92	0.08	0	0	0	2	CBL 5FU	0.50 0.50	-1.6	2	DOX Sunitinib	0.50 0.50	-0.1	1.5	chk1	2	CBL 5FU	0.50 0.50	-1.6	2	CBL 5FU	0.50 0.50	-1.6	0
1875	2	0	0	0	0.93	0.07	0	0	0	2	CBL 5FU	0.50 0.50	-1.6	2	DOX Sunitinib	0.50 0.50	-0.1	1.5	chk1	2	CBL 5FU	0.50 0.50	-1.6	2	CBL 5FU	0.50 0.50	-1.6	0
1876	2	0	0	0	0.94	0.06	0	0	0	2	CBL 5FU	0.50 0.50	-1.62	2	DOX Sunitinib	0.50 0.50	-0.08	1.54	chk1	2	CBL 5FU	0.50 0.50	-1.62	2	CBL 5FU	0.50 0.50	-1.62	0
1877	2	0	0	0	0.95	0.05	0	0	0	2	CBL 5FU	0.50 0.50	-1.62	2	DOX Sunitinib	0.50 0.50	-0.08	1.54	chk1	2	CBL 5FU	0.50 0.50	-1.62	2	CBL 5FU	0.50 0.50	-1.62	0
1878	2	0	0	0	0.96	0.04	0	0	0	2	CBL 5FU	0.50 0.50	-1.64	2	DOX Sunitinib	0.50 0.50	-0.06	1.58	chk1	2	CBL 5FU	0.50 0.50	-1.64	2	CBL 5FU	0.50 0.50	-1.64	0
1879	2	0	0	0	0.97	0.03	0	0	0	2	CBL 5FU	0.50 0.50	-1.64	2	DOX Sunitinib	0.50 0.50	-0.06	1.58	chk1	2	CBL 5FU	0.50 0.50	-1.64	2	CBL 5FU	0.50 0.50	-1.64	0
1880	2	0	0	0	0.98	0.02	0	0	0	2	CBL 5FU	0.50 0.50	-1.66	2	DOX Sunitinib	0.50 0.50	-0.06	1.6	chk1	2	CBL 5FU	0.50 0.50	-1.66	2	CBL 5FU	0.50 0.50	-1.66	0
1881	2	0	0	0	0.99	0.01	0	0	0	2	CBL 5FU	0.50 0.50	-1.66	2	DOX Sunitinib	0.50 0.50	-0.04	1.62	chk1	2	CBL 5FU	0.50 0.50	-1.66	2	CBL 5FU	0.50 0.50	-1.66	0
1882	2	0	0	0	0.01	0	0.99	0	0	2	DOX 17AAG	0.50 0.50	-0.92	2	CBL IRT	0.50 0.50	1	1.92	dnapk	2	DOX 17AAG	0.50 0.50	-0.92	2	DOX 17AAG	0.50 0.50	-0.92	0
1883	2	0	0	0	0.02	0	0.98	0	0	2	DOX 17AAG	0.50 0.50	-0.92	2	CBL IRT	0.50 0.50	0.98	1.9	dnapk	2	DOX 17AAG	0.50 0.50	-0.92	2	DOX 17AAG	0.50 0.50	-0.92	0
1884	2	0	0	0	0.03	0	0.97	0	0	2	DOX 17AAG	0.50 0.50	-0.92	2	CBL IRT	0.50 0.50	0.96	1.88	dnapk	2	DOX 17AAG	0.50 0.50	-0.92	2	DOX 17AAG	0.50 0.50	-0.92	0
1885	2	0	0	0	0.04	0	0.96	0	0	2	DOX 17AAG	0.50 0.50	-0.9	2	CBL IRT	0.50 0.50	0.92	1.82	dnapk	2	DOX 17AAG	0.50 0.50	-0.9	2	DOX 17AAG	0.50 0.50	-0.9	0
1886	2	0	0	0	0.05	0	0.95	0	0	2	DOX 17AAG	0.50 0.50	-0.9	2	CBL IRT	0.50 0.50	0.9	1.8	dnapk	2	DOX 17AAG	0.50 0.50	-0.9	2	DOX 17AAG	0.50 0.50	-0.9	0
1887	2	0	0	0	0.06	0	0.94	0	0	2	DOX 17AAG	0.50 0.50	-0.9	2	CBL IRT	0.50 0.50	0.88	1.78	dnapk	2	DOX 17AAG	0.50 0.50	-0.9	2	DOX 17AAG	0.50 0.50	-0.9	0
1888	2	0	0	0	0.07	0	0.93	0	0	2	DOX 17AAG	0.50 0.50	-0.88	2	CBL IRT	0.50 0.50	0.86	1.74	dnapk	2	DOX 17AAG	0.50 0.50	-0.88	2	DOX 17AAG	0.50 0.50	-0.88	0
1889	2	0	0	0	0.08	0	0.92	0	0	2	DOX 17AAG	0.50 0.50	-0.88	2	CBL IRT	0.50 0.50	0.84	1.72	dnapk	2	DOX 17AAG	0.50 0.50	-0.88	2	DOX 17AAG	0.50 0.50	-0.88	0
1890	2	0	0	0	0.09	0	0.91	0	0	2	DOX 17AAG	0.50 0.50	-0.88	2	CBL IRT	0.50 0.50	0.82	1.7	dnapk	2	DOX 17AAG	0.50 0.50	-0.88	2	DOX 17AAG	0.50 0.50	-0.88	0
1891	2	0	0	0	0.1	0	0.9	0	0	2	DOX 17AAG	0.50 0.50	-0.86	2	CBL IRT	0.50 0.50	0.8	1.66	dnapk	2	DOX 17AAG	0.50 0.50	-0.86	2	DOX 17AAG	0.50 0.50	-0.86	0
1892	2	0	0	0	0.11	0	0.89	0	0	2	DOX 17AAG	0.50 0.50	-0.86	2	CBL IRT	0.50 0.50	0.78	1.64	dnapk	2	DOX 17AAG	0.50 0.50	-0.86	2	DOX 17AAG	0.50 0.50	-0.86	0
1893	2	0	0	0	0.12	0	0.88	0	0	2	DOX 17AAG	0.50 0.50	-0.86	2	CBL IRT	0.50 0.50	0.74	1.6	dnapk	2	DOX 17AAG	0.50 0.50	-0.86	2	DOX 17AAG	0.50 0.50	-0.86	0
1894	2	0	0	0	0.13	0	0.87	0	0	2	DOX 17AAG	0.50 0.50	-0.86	2	CBL IRT	0.50 0.50	0.72	1.58	dnapk	2	DOX 17AAG	0.50 0.50	-0.86	2	DOX 17AAG	0.50 0.50	-0.86	0
1895	2	0	0	0	0.14	0	0.86	0	0	2	DOX 17AAG	0.50 0.50	-0.84	2	CBL IRT	0.50 0.50	0.7	1.54	dnapk	2	DOX 17AAG	0.50 0.50	-0.84	2	DOX 17AAG	0.50 0.50	-0.84	0
1896	2	0	0	0	0.15	0	0.85	0	0	2	DOX 17AAG	0.50 0.50	-0.84	2	CBL IRT	0.50 0.50	0.68	1.52	dnapk	2	DOX 17AAG	0.50 0.50	-0.84	2	DOX 17AAG	0.50 0.50	-0.84	0
1897	2	0	0	0	0.16	0	0.84	0	0	2	DOX 17AAG	0.50 0.50	-0.84	2	CBL IRT	0.50 0.50	0.66	1.5	dnapk	2	DOX 17AAG	0.50 0.50	-0.84	2	DOX 17AAG	0.50 0.50	-0.84	0
1898	2	0	0	0	0.17	0	0.83	0	0	2	DOX 17AAG	0.50 0.50	-0.82	2	CBL IRT	0.50 0.50	0.64	1.46	dnapk	2	DOX 17AAG	0.50 0.50	-0.82	2	DOX 17AAG	0.50 0.50	-0.82	0
1899	2	0	0	0	0.18	0	0.82	0	0	2	DOX 17AAG	0.50 0.50	-0.82	2	CBL IRT	0.50 0.50	0.62	1.44	dnapk	2	DOX 17AAG	0.50 0.50	-0.82	2	DOX 17AAG	0.50 0.50	-0.82	0
1900	2	0	0	0	0.19	0	0.81	0	0	2	DOX 17AAG	0.50 0.50	-0.82	2	CBL IRT	0.50 0.50	0.58	1.4	dnapk	2	DOX 17AAG	0.50 0.50	-0.82	2	DOX 17AAG	0.50 0.50	-0.82	0
1901	2	0	0	0	0.2	0	0.8	0	0	2	DOX 17AAG	0.50 0.50	-0.82	2	CBL IRT	0.50 0.50	0.56	1.38	dnapk	2	DOX 17AAG	0.50 0.50	-0.82	2	DOX 17AAG	0.50 0.50	-0.82	0
1902	2	0	0	0	0.21	0	0.79	0	0	2	DOX 17AAG	0.50 0.50	-0.8	2	CBL IRT	0.50 0.50	0.54	1.34	dnapk	2	DOX 17AAG	0.50 0.50	-0.8	2	DOX 17AAG	0.50 0.50	-0.8	0
1903	2	0	0	0	0.22	0	0.78	0	0	2	DOX 17AAG	0.50 0.50	-0.8	2	CBL IRT	0.50 0.50	0.52	1.32	dnapk	2	DOX 17AAG	0.50 0.50	-0.8	2	DOX 17AAG	0.50 0.50	-0.8	0
1904	2	0	0	0	0.23	0	0.77	0	0	2	DOX 17AAG	0.50 0.50	-0.8	2	CBL IRT	0.50 0.50	0.5	1.3	dnapk	2	DOX 17AAG	0.50 0.50	-0.8	2	DOX 17AAG	0.50 0.50	-0.8	0
1905	2	0	0	0	0.24	0	0.76	0	0	2	DOX 17AAG	0.50 0.50	-0.78	2	CBL IRT	0.50 0.50	0.48	1.26	dnapk	2	DOX 17AAG	0.50 0.50	-0.78	2	DOX 17AAG	0.50 0.50	-0.78	0
1906	2	0	0	0	0.25	0	0.75	0	0	2	DOX 17AAG	0.50 0.50	-0.78	2	CBL IRT	0.50 0.50	0.46	1.24	dnapk	2	DOX 17AAG	0.50 0.50	-0.78	2	DOX 17AAG	0.50 0.50	-0.78	0
1907	2	0	0	0	0.26	0	0.74	0	0	2	DOX 17AAG	0.50 0.50	-0.78	2	CBL IRT	0.50 0.50	0.42	1.2	dnapk	2	DOX 17AAG	0.50 0.50	-0.78	2	DOX 17AAG	0.50 0.50	-0.78	0
1908	2	0	0	0	0.27	0	0.73	0	0	2	DOX 17AAG	0.50 0.50	-0.78	2	CBL IRT	0.50 0.50	0.4	1.18	dnapk	2	DOX 17AAG	0.50 0.50	-0.78	2	DOX 17AAG	0.50 0.50	-0.78	0
1909	2	0	0	0	0.28	0	0.72	0	0	2	DOX 17AAG	0.50 0.50	-0.76	2	CBL IRT	0.50 0.50	0.38	1.14	dnapk	2	DOX 17AAG	0.50 0.50	-0.76	2	DOX 17AAG	0.50 0.50	-0.76	0
1910	2	0	0	0	0.29	0	0.71	0	0	2	DOX 17AAG	0.50 0.50	-0.76	2	CBL IRT	0.50 0.50	0.36	1.12	dnapk	2	DOX 17AAG	0.50 0.50	-0.76	2	DOX 17AAG	0.50 0.50	-0.76	0
1911	2	0	0	0	0.3	0	0.7	0	0	2	DOX 17AAG	0.50 0.50	-0.76	2	CBL IRT	0.50 0.50	0.34	1.1	dnapk	2	DOX 17AAG	0.50 0.50	-0.76	2	DOX 17AAG	0.50 0.50	-0.76	0
1912	2	0	0	0	0.31	0	0.69	0	0	2	DOX 17AAG	0.50 0.50	-0.74	2	IRT Erlotinib	0.50 0.50	0.32	1.06	dnapk	2	DOX 17AAG	0.50 0.50	-0.74	2	DOX 17AAG	0.50 0.50	-0.74	0
1913	2	0	0	0	0.32	0	0.68	0	0	2	DOX 17AAG	0.50 0.50	-0.74	2	IRT Erlotinib	0.50 0.50	0.3	1.04	dnapk	2	DOX 17AAG	0.50 0.50	-0.74	2	DOX 17AAG	0.50 0.50	-0.74	0
1914	2	0	0	0	0.33	0	0.67	0	0	2	DOX 17AAG	0.50 0.50	-0.74	2	IRT Erlotinib	0.50 0.50	0.28	1.02	dnapk	2	DOX 17AAG	0.50 0.50	-0.74	2	DOX 17AAG	0.50 0.50	-0.74	0
1915	2	0	0	0	0.34	0	0.66	0	0	2	DOX 17AAG	0.50 0.50	-0.72	2	IRT Erlotinib	0.50 0.50	0.26	0.98	dnapk	2	DOX 17AAG	0.50 0.50	-0.72	2	DOX 17AAG	0.50 0.50	-0.72	0
1916	2	0	0	0	0.35	0	0.65	0	0	2	DOX 17AAG	0.50 0.50	-0.72	2	IRT Sunitinib	0.50 0.50	0.24	0.96	dnapk	2	DOX 17AAG	0.50 0.50	-0.72	2	DOX 17AAG	0.50 0.50	-0.72	0
1917	2	0	0	0	0.36	0	0.64	0	0	2	DOX 17AAG	0.50 0.50	-0.72	2	IRT Sunitinib	0.50 0.50	0.24	0.96	dnapk	2	DOX 17AAG	0.50 0.50	-0.72	2	DOX 17AAG	0.50 0.50	-0.72	0
1918	2	0	0	0	0.37	0	0.63	0	0	2	DOX 17AAG	0.50 0.50	-0.72	2	IRT Sunitinib	0.50 0.50	0.22	0.94	dnapk	2	DOX 17AAG	0.50 0.50	-0.72	2	DOX 17AAG	0.50 0.50	-0.72	0
1919	2	0	0	0	0.38	0	0.62	0	0	2	DOX 17AAG	0.50 0.50	-0.7	2	IRT Sunitinib	0.50 0.50	0.2	0.9	dnapk	2	DOX 17AAG	0.50 0.50	-0.7	2	DOX 17AAG	0.50 0.50	-0.7	0
1920	2	0	0	0	0.39	0	0.61	0	0	2	DOX 17AAG	0.50 0.50	-0.7	2	IRT Sunitinib	0.50 0.50	0.2	0.9	dnapk	2	DOX 17AAG	0.50 0.50	-0.7	2	DOX 17AAG	0.50 0.50	-0.7	0
1921	2	0	0	0	0.4	0	0.6	0	0	2	DOX 17AAG	0.50 0.50	-0.7	2	IRT Sunitinib	0.50 0.50	0.18	0.88	dnapk	2	DOX 17AAG	0.50 0.50	-0.7	2	DOX 17AAG	0.50 0.50	-0.7	0
1922	2	0	0	0	0.41	0	0.59	0	0	2	DOX 17AAG	0.50 0.50	-0.68	2	IRT Sunitinib	0.50 0.50	0.16	0.84	dnapk	2	DOX 17AAG	0.50 0.50	-0.68	2	DOX 17AAG	0.50 0.50	-0.68	0
1923	2	0	0	0	0.42	0	0.58	0	0	2	DOX 17AAG	0.50 0.50	-0.68	2	IRT Sunitinib	0.50 0.50	0.16	0.84	dnapk	2	DOX 17AAG	0.50 0.50	-0.68	2	DOX 17AAG	0.50 0.50	-0.68	0
1924	2	0	0	0	0.43	0	0.57	0	0	2	DOX 17AAG	0.50 0.50	-0.68	2	IRT Sunitinib	0.50 0.50	0.14	0.82	dnapk	2	DOX 17AAG	0.50 0.50	-0.68	2	DOX 17AAG	0.50 0.50	-0.68	0
1925	2	0	0	0	0.44	0	0.56	0	0	2	DOX 17AAG	0.50 0.50	-0.68	2	IRT Sunitinib	0.50 0.50	0.12	0.8	dnapk	2	DOX 17AAG	0.50 0.50	-0.68	2	DOX 17AAG	0.50 0.50	-0.68	0
1926	2	0	0	0	0.45	0	0.55	0	0	2	DOX 17AAG	0.50 0.50	-0.66	2	IRT Sunitinib	0.50 0.50	0.12	0.78	dnapk	2	DOX 17AAG	0.50 0.50	-0.66	2	DOX 17AAG	0.50 0.50	-0.66	0
1927	2	0	0	0	0.46	0	0.54	0	0	2	DOX 17AAG	0.50 0.50	-0.66	2	IRT Sunitinib	0.50 0.50	0.1	0.76	dnapk	2	DOX 17AAG	0.50 0.50	-0.66	2	DOX 17AAG	0.50 0.50	-0.66	0
1928	2	0	0	0	0.47	0	0.53	0	0	2	DOX 17AAG	0.50 0.50	-0.66	2	IRT Sunitinib	0.50 0.50	0.1	0.76	dnapk	2	DOX 17AAG	0.50 0.50	-0.66	2	DOX 17AAG	0.50 0.50	-0.66	0
1929	2	0	0	0	0.48	0	0.52	0	0	2	DOX 17AAG	0.50 0.50	-0.64	2	IRT Sunitinib	0.50 0.50	0.08	0.72	dnapk	2	DOX 17AAG	0.50 0.50	-0.64	2	DOX 17AAG	0.50 0.50	-0.64	0
1930	2	0	0	0	0.49	0	0.51	0	0	2	5FU 17AAG	0.50 0.50	-0.66	2	IRT Sunitinib	0.50 0.50	0.06	0.72	dnapk	2	DOX 17AAG	0.50 0.50	-0.64	2	5FU 17AAG	0.50 0.50	-0.66	0.02
1931	2	0	0	0	0.5	0	0.5	0	0	2	5FU 17AAG	0.50 0.50	-0.68	2	IRT Sunitinib	0.50 0.50	0.06	0.74	dnapk	2	DOX 17AAG	0.50 0.50	-0.64	2	5FU 17AAG	0.50 0.50	-0.68	0.04
1932	2	0	0	0	0.51	0	0.49	0	0	2	5FU 17AAG	0.50 0.50	-0.68	2	IRT Sunitinib	0.50 0.50	0.04	0.72	chk1	2	CBL 5FU	0.50 0.50	-0.48	2	5FU 17AAG	0.50 0.50	-0.68	0.2
1933	2	0	0	0	0.52	0	0.48	0	0	2	5FU 17AAG	0.50 0.50	-0.7	2	IRT Sunitinib	0.50 0.50	0.02	0.72	chk1	2	CBL 5FU	0.50 0.50	-0.5	2	5FU 17AAG	0.50 0.50	-0.7	0.2
1934	2	0	0	0	0.53	0	0.47	0	0	2	5FU 17AAG	0.50 0.50	-0.7	2	IRT Sunitinib	0.50 0.50	0.02	0.72	chk1	2	CBL 5FU	0.50 0.50	-0.52	2	5FU 17AAG	0.50 0.50	-0.7	0.18
1935	2	0	0	0	0.54	0	0.46	0	0	2	5FU 17AAG	0.50 0.50	-0.72	2	IRT Sunitinib	0.50 0.50	0	0.72	chk1	2	CBL 5FU	0.50 0.50	-0.56	2	5FU 17AAG	0.50 0.50	-0.72	0.16
1936	2	0	0	0	0.55	0	0.45	0	0	2	5FU 17AAG	0.50 0.50	-0.74	2	IRT Sunitinib	0.50 0.50	-0.02	0.72	chk1	2	CBL 5FU	0.50 0.50	-0.58	2	5FU 17AAG	0.50 0.50	-0.74	0.16
1937	2	0	0	0	0.56	0	0.44	0	0	2	5FU 17AAG	0.50 0.50	-0.74	2	ActD Sunitinib	0.50 0.50	-0.02	0.72	chk1	2	CBL 5FU	0.50 0.50	-0.6	2	5FU 17AAG	0.50 0.50	-0.74	0.14
1938	2	0	0	0	0.57	0	0.43	0	0	2	5FU 17AAG	0.50 0.50	-0.76	2	ActD Sunitinib	0.50 0.50	-0.02	0.74	chk1	2	CBL 5FU	0.50 0.50	-0.62	2	5FU 17AAG	0.50 0.50	-0.76	0.14
1939	2	0	0	0	0.58	0	0.42	0	0	2	5FU 17AAG	0.50 0.50	-0.78	2	ActD Sunitinib	0.50 0.50	-0.02	0.76	chk1	2	CBL 5FU	0.50 0.50	-0.64	2	5FU 17AAG	0.50 0.50	-0.78	0.14
1940	2	0	0	0	0.59	0	0.41	0	0	2	5FU 17AAG	0.50 0.50	-0.78	2	ActD Sunitinib	0.50 0.50	-0.04	0.74	chk1	2	CBL 5FU	0.50 0.50	-0.68	2	5FU 17AAG	0.50 0.50	-0.78	0.1
1941	2	0	0	0	0.6	0	0.4	0	0	2	5FU 17AAG	0.50 0.50	-0.8	2	ActD Sunitinib	0.50 0.50	-0.04	0.76	chk1	2	CBL 5FU	0.50 0.50	-0.7	2	5FU 17AAG	0.50 0.50	-0.8	0.1
1942	2	0	0	0	0.61	0	0.39	0	0	2	5FU 17AAG	0.50 0.50	-0.82	2	ActD Sunitinib	0.50 0.50	-0.04	0.78	chk1	2	CBL 5FU	0.50 0.50	-0.72	2	5FU 17AAG	0.50 0.50	-0.82	0.1
1943	2	0	0	0	0.62	0	0.38	0	0	2	5FU 17AAG	0.50 0.50	-0.82	2	ActD Sunitinib	0.50 0.50	-0.04	0.78	chk1	2	CBL 5FU	0.50 0.50	-0.74	2	5FU 17AAG	0.50 0.50	-0.82	0.08
1944	2	0	0	0	0.63	0	0.37	0	0	2	5FU 17AAG	0.50 0.50	-0.84	2	ActD Sunitinib	0.50 0.50	-0.04	0.8	chk1	2	CBL 5FU	0.50 0.50	-0.78	2	5FU 17AAG	0.50 0.50	-0.84	0.06
1945	2	0	0	0	0.64	0	0.36	0	0	2	5FU 17AAG	0.50 0.50	-0.86	2	ActD Sunitinib	0.50 0.50	-0.04	0.82	chk1	2	CBL 5FU	0.50 0.50	-0.8	2	5FU 17AAG	0.50 0.50	-0.86	0.06
1946	2	0	0	0	0.65	0	0.35	0	0	2	5FU 17AAG	0.50 0.50	-0.86	2	ActD Sunitinib	0.50 0.50	-0.04	0.82	chk1	2	CBL 5FU	0.50 0.50	-0.82	2	5FU 17AAG	0.50 0.50	-0.86	0.04
1947	2	0	0	0	0.66	0	0.34	0	0	2	5FU 17AAG	0.50 0.50	-0.88	2	ActD Sunitinib	0.50 0.50	-0.06	0.82	chk1	2	CBL 5FU	0.50 0.50	-0.84	2	5FU 17AAG	0.50 0.50	-0.88	0.04
1948	2	0	0	0	0.67	0	0.33	0	0	2	5FU 17AAG	0.50 0.50	-0.9	2	ActD Sunitinib	0.50 0.50	-0.06	0.84	chk1	2	CBL 5FU	0.50 0.50	-0.86	2	5FU 17AAG	0.50 0.50	-0.9	0.04
1949	2	0	0	0	0.68	0	0.32	0	0	2	5FU 17AAG	0.50 0.50	-0.9	2	ActD Sunitinib	0.50 0.50	-0.06	0.84	chk1	2	CBL 5FU	0.50 0.50	-0.9	2	5FU 17AAG	0.50 0.50	-0.9	0
1950	2	0	0	0	0.69	0	0.31	0	0	2	CBL 5FU	0.50 0.50	-0.92	2	ActD Sunitinib	0.50 0.50	-0.06	0.86	chk1	2	CBL 5FU	0.50 0.50	-0.92	2	CBL 5FU	0.50 0.50	-0.92	0
1951	2	0	0	0	0.7	0	0.3	0	0	2	CBL 5FU	0.50 0.50	-0.94	2	ActD Sunitinib	0.50 0.50	-0.06	0.88	chk1	2	CBL 5FU	0.50 0.50	-0.94	2	CBL 5FU	0.50 0.50	-0.94	0
1952	2	0	0	0	0.71	0	0.29	0	0	2	CBL 5FU	0.50 0.50	-0.96	2	ActD Sunitinib	0.50 0.50	-0.06	0.9	chk1	2	CBL 5FU	0.50 0.50	-0.96	2	CBL 5FU	0.50 0.50	-0.96	0
1953	2	0	0	0	0.72	0	0.28	0	0	2	CBL 5FU	0.50 0.50	-1	2	ActD Sunitinib	0.50 0.50	-0.08	0.92	chk1	2	CBL 5FU	0.50 0.50	-1	2	CBL 5FU	0.50 0.50	-1	0
1954	2	0	0	0	0.73	0	0.27	0	0	2	CBL 5FU	0.50 0.50	-1.02	2	ActD Sunitinib	0.50 0.50	-0.08	0.94	chk1	2	CBL 5FU	0.50 0.50	-1.02	2	CBL 5FU	0.50 0.50	-1.02	0
1955	2	0	0	0	0.74	0	0.26	0	0	2	CBL 5FU	0.50 0.50	-1.04	2	ActD Sunitinib	0.50 0.50	-0.08	0.96	chk1	2	CBL 5FU	0.50 0.50	-1.04	2	CBL 5FU	0.50 0.50	-1.04	0
1956	2	0	0	0	0.75	0	0.25	0	0	2	CBL 5FU	0.50 0.50	-1.06	2	ActD Sunitinib	0.50 0.50	-0.08	0.98	chk1	2	CBL 5FU	0.50 0.50	-1.06	2	CBL 5FU	0.50 0.50	-1.06	0
1957	2	0	0	0	0.76	0	0.24	0	0	2	CBL 5FU	0.50 0.50	-1.08	2	ActD Sunitinib	0.50 0.50	-0.08	1	chk1	2	CBL 5FU	0.50 0.50	-1.08	2	CBL 5FU	0.50 0.50	-1.08	0
1958	2	0	0	0	0.77	0	0.23	0	0	2	CBL 5FU	0.50 0.50	-1.12	2	ActD Sunitinib	0.50 0.50	-0.08	1.04	chk1	2	CBL 5FU	0.50 0.50	-1.12	2	CBL 5FU	0.50 0.50	-1.12	0
1959	2	0	0	0	0.78	0	0.22	0	0	2	CBL 5FU	0.50 0.50	-1.14	2	ActD Sunitinib	0.50 0.50	-0.1	1.04	chk1	2	CBL 5FU	0.50 0.50	-1.14	2	CBL 5FU	0.50 0.50	-1.14	0
1960	2	0	0	0	0.79	0	0.21	0	0	2	CBL 5FU	0.50 0.50	-1.16	2	ActD Sunitinib	0.50 0.50	-0.1	1.06	chk1	2	CBL 5FU	0.50 0.50	-1.16	2	CBL 5FU	0.50 0.50	-1.16	0
1961	2	0	0	0	0.8	0	0.2	0	0	2	CBL 5FU	0.50 0.50	-1.18	2	ActD Sunitinib	0.50 0.50	-0.1	1.08	chk1	2	CBL 5FU	0.50 0.50	-1.18	2	CBL 5FU	0.50 0.50	-1.18	0
1962	2	0	0	0	0.81	0	0.19	0	0	2	CBL 5FU	0.50 0.50	-1.22	2	ActD Sunitinib	0.50 0.50	-0.1	1.12	chk1	2	CBL 5FU	0.50 0.50	-1.22	2	CBL 5FU	0.50 0.50	-1.22	0
1963	2	0	0	0	0.82	0	0.18	0	0	2	CBL 5FU	0.50 0.50	-1.24	2	ActD Sunitinib	0.50 0.50	-0.1	1.14	chk1	2	CBL 5FU	0.50 0.50	-1.24	2	CBL 5FU	0.50 0.50	-1.24	0
1964	2	0	0	0	0.83	0	0.17	0	0	2	CBL 5FU	0.50 0.50	-1.26	2	ActD Sunitinib	0.50 0.50	-0.1	1.16	chk1	2	CBL 5FU	0.50 0.50	-1.26	2	CBL 5FU	0.50 0.50	-1.26	0
1965	2	0	0	0	0.84	0	0.16	0	0	2	CBL 5FU	0.50 0.50	-1.28	2	DOX Sunitinib	0.50 0.50	-0.1	1.18	chk1	2	CBL 5FU	0.50 0.50	-1.28	2	CBL 5FU	0.50 0.50	-1.28	0
1966	2	0	0	0	0.85	0	0.15	0	0	2	CBL 5FU	0.50 0.50	-1.3	2	DOX Sunitinib	0.50 0.50	-0.1	1.2	chk1	2	CBL 5FU	0.50 0.50	-1.3	2	CBL 5FU	0.50 0.50	-1.3	0
1967	2	0	0	0	0.86	0	0.14	0	0	2	CBL 5FU	0.50 0.50	-1.34	2	DOX Sunitinib	0.50 0.50	-0.1	1.24	chk1	2	CBL 5FU	0.50 0.50	-1.34	2	CBL 5FU	0.50 0.50	-1.34	0
1968	2	0	0	0	0.87	0	0.13	0	0	2	CBL 5FU	0.50 0.50	-1.36	2	DOX Sunitinib	0.50 0.50	-0.1	1.26	chk1	2	CBL 5FU	0.50 0.50	-1.36	2	CBL 5FU	0.50 0.50	-1.36	0
1969	2	0	0	0	0.88	0	0.12	0	0	2	CBL 5FU	0.50 0.50	-1.38	2	DOX Sunitinib	0.50 0.50	-0.08	1.3	chk1	2	CBL 5FU	0.50 0.50	-1.38	2	CBL 5FU	0.50 0.50	-1.38	0
1970	2	0	0	0	0.89	0	0.11	0	0	2	CBL 5FU	0.50 0.50	-1.4	2	DOX Sunitinib	0.50 0.50	-0.08	1.32	chk1	2	CBL 5FU	0.50 0.50	-1.4	2	CBL 5FU	0.50 0.50	-1.4	0
1971	2	0	0	0	0.9	0	0.1	0	0	2	CBL 5FU	0.50 0.50	-1.44	2	DOX Sunitinib	0.50 0.50	-0.08	1.36	chk1	2	CBL 5FU	0.50 0.50	-1.44	2	CBL 5FU	0.50 0.50	-1.44	0
1972	2	0	0	0	0.91	0	0.09	0	0	2	CBL 5FU	0.50 0.50	-1.46	2	DOX Sunitinib	0.50 0.50	-0.08	1.38	chk1	2	CBL 5FU	0.50 0.50	-1.46	2	CBL 5FU	0.50 0.50	-1.46	0
1973	2	0	0	0	0.92	0	0.08	0	0	2	CBL 5FU	0.50 0.50	-1.48	2	DOX Sunitinib	0.50 0.50	-0.08	1.4	chk1	2	CBL 5FU	0.50 0.50	-1.48	2	CBL 5FU	0.50 0.50	-1.48	0
1974	2	0	0	0	0.93	0	0.07	0	0	2	CBL 5FU	0.50 0.50	-1.5	2	DOX Sunitinib	0.50 0.50	-0.06	1.44	chk1	2	CBL 5FU	0.50 0.50	-1.5	2	CBL 5FU	0.50 0.50	-1.5	0
1975	2	0	0	0	0.94	0	0.06	0	0	2	CBL 5FU	0.50 0.50	-1.52	2	DOX Sunitinib	0.50 0.50	-0.06	1.46	chk1	2	CBL 5FU	0.50 0.50	-1.52	2	CBL 5FU	0.50 0.50	-1.52	0
1976	2	0	0	0	0.95	0	0.05	0	0	2	CBL 5FU	0.50 0.50	-1.56	2	DOX Sunitinib	0.50 0.50	-0.06	1.5	chk1	2	CBL 5FU	0.50 0.50	-1.56	2	CBL 5FU	0.50 0.50	-1.56	0
1977	2	0	0	0	0.96	0	0.04	0	0	2	CBL 5FU	0.50 0.50	-1.58	2	DOX Sunitinib	0.50 0.50	-0.06	1.52	chk1	2	CBL 5FU	0.50 0.50	-1.58	2	CBL 5FU	0.50 0.50	-1.58	0
1978	2	0	0	0	0.97	0	0.03	0	0	2	CBL 5FU	0.50 0.50	-1.6	2	DOX Sunitinib	0.50 0.50	-0.06	1.54	chk1	2	CBL 5FU	0.50 0.50	-1.6	2	CBL 5FU	0.50 0.50	-1.6	0
1979	2	0	0	0	0.98	0	0.02	0	0	2	CBL 5FU	0.50 0.50	-1.62	2	DOX Sunitinib	0.50 0.50	-0.04	1.58	chk1	2	CBL 5FU	0.50 0.50	-1.62	2	CBL 5FU	0.50 0.50	-1.62	0
1980	2	0	0	0	0.99	0	0.01	0	0	2	CBL 5FU	0.50 0.50	-1.66	2	DOX Sunitinib	0.50 0.50	-0.04	1.62	chk1	2	CBL 5FU	0.50 0.50	-1.66	2	CBL 5FU	0.50 0.50	-1.66	0
1981	2	0	0	0	0.01	0	0	0.99	0	2	CBL Vin	0.50 0.50	-1.46	2	5FU Erlotinib	0.50 0.50	1.44	2.9	bok	2	CBL Vin	0.50 0.50	-1.46	2	CBL Vin	0.50 0.50	-1.46	0
1982	2	0	0	0	0.02	0	0	0.98	0	2	CBL Vin	0.50 0.50	-1.44	2	5FU Erlotinib	0.50 0.50	1.4	2.84	bok	2	CBL Vin	0.50 0.50	-1.44	2	CBL Vin	0.50 0.50	-1.44	0
1983	2	0	0	0	0.03	0	0	0.97	0	2	CBL Vin	0.50 0.50	-1.44	2	5FU Erlotinib	0.50 0.50	1.38	2.82	bok	2	CBL Vin	0.50 0.50	-1.44	2	CBL Vin	0.50 0.50	-1.44	0
1984	2	0	0	0	0.04	0	0	0.96	0	2	CBL Vin	0.50 0.50	-1.44	2	5FU Erlotinib	0.50 0.50	1.36	2.8	bok	2	CBL Vin	0.50 0.50	-1.44	2	CBL Vin	0.50 0.50	-1.44	0
1985	2	0	0	0	0.05	0	0	0.95	0	2	CBL Vin	0.50 0.50	-1.44	2	5FU Erlotinib	0.50 0.50	1.32	2.76	bok	2	CBL Vin	0.50 0.50	-1.44	2	CBL Vin	0.50 0.50	-1.44	0
1986	2	0	0	0	0.06	0	0	0.94	0	2	CBL Vin	0.50 0.50	-1.42	2	5FU Erlotinib	0.50 0.50	1.3	2.72	bok	2	CBL Vin	0.50 0.50	-1.42	2	CBL Vin	0.50 0.50	-1.42	0
1987	2	0	0	0	0.07	0	0	0.93	0	2	CBL Vin	0.50 0.50	-1.42	2	5FU Erlotinib	0.50 0.50	1.26	2.68	bok	2	CBL Vin	0.50 0.50	-1.42	2	CBL Vin	0.50 0.50	-1.42	0
1988	2	0	0	0	0.08	0	0	0.92	0	2	CBL Vin	0.50 0.50	-1.42	2	5FU Erlotinib	0.50 0.50	1.24	2.66	bok	2	CBL Vin	0.50 0.50	-1.42	2	CBL Vin	0.50 0.50	-1.42	0
1989	2	0	0	0	0.09	0	0	0.91	0	2	CBL Vin	0.50 0.50	-1.42	2	5FU Erlotinib	0.50 0.50	1.2	2.62	bok	2	CBL Vin	0.50 0.50	-1.42	2	CBL Vin	0.50 0.50	-1.42	0
1990	2	0	0	0	0.1	0	0	0.9	0	2	CBL Vin	0.50 0.50	-1.42	2	5FU Erlotinib	0.50 0.50	1.18	2.6	bok	2	CBL Vin	0.50 0.50	-1.42	2	CBL Vin	0.50 0.50	-1.42	0
1991	2	0	0	0	0.11	0	0	0.89	0	2	CBL Vin	0.50 0.50	-1.4	2	5FU Erlotinib	0.50 0.50	1.14	2.54	bok	2	CBL Vin	0.50 0.50	-1.4	2	CBL Vin	0.50 0.50	-1.4	0
1992	2	0	0	0	0.12	0	0	0.88	0	2	CBL Vin	0.50 0.50	-1.4	2	5FU Erlotinib	0.50 0.50	1.12	2.52	bok	2	CBL Vin	0.50 0.50	-1.4	2	CBL Vin	0.50 0.50	-1.4	0
1993	2	0	0	0	0.13	0	0	0.87	0	2	CBL Vin	0.50 0.50	-1.4	2	5FU Erlotinib	0.50 0.50	1.08	2.48	bok	2	CBL Vin	0.50 0.50	-1.4	2	CBL Vin	0.50 0.50	-1.4	0
1994	2	0	0	0	0.14	0	0	0.86	0	2	CBL Vin	0.50 0.50	-1.4	2	5FU Erlotinib	0.50 0.50	1.06	2.46	bok	2	CBL Vin	0.50 0.50	-1.4	2	CBL Vin	0.50 0.50	-1.4	0
1995	2	0	0	0	0.15	0	0	0.85	0	2	CBL Vin	0.50 0.50	-1.38	2	5FU Erlotinib	0.50 0.50	1.02	2.4	bok	2	CBL Vin	0.50 0.50	-1.38	2	CBL Vin	0.50 0.50	-1.38	0
1996	2	0	0	0	0.16	0	0	0.84	0	2	CBL Vin	0.50 0.50	-1.38	2	5FU Erlotinib	0.50 0.50	1	2.38	bok	2	CBL Vin	0.50 0.50	-1.38	2	CBL Vin	0.50 0.50	-1.38	0
1997	2	0	0	0	0.17	0	0	0.83	0	2	CBL Vin	0.50 0.50	-1.38	2	5FU Erlotinib	0.50 0.50	0.96	2.34	bok	2	CBL Vin	0.50 0.50	-1.38	2	CBL Vin	0.50 0.50	-1.38	0
1998	2	0	0	0	0.18	0	0	0.82	0	2	CBL Vin	0.50 0.50	-1.38	2	5FU Erlotinib	0.50 0.50	0.94	2.32	bok	2	CBL Vin	0.50 0.50	-1.38	2	CBL Vin	0.50 0.50	-1.38	0
[truncated: 774 more rows]
